# Supplementary material for: Gene Expression Profiling of Neospora caninum in Bovine Macrophages Reveals Differences Between Isolates Associated With Key Parasite Functions
Source: Front Cell Infect Microbiol. 2019 Oct 15;9:354. doi: 10.3389/fcimb.2019.00354 (PMC6803445; doi:10.3389/fcimb.2019.00354)
Supplement: Supplementary file 2 [file Table_2.XLSX]

## Sheet: Gene expression
RNA-seq results for Neospora caninum genes in the comparison Nc-Spain1H-infected macrophages versus Nc-Spain7-infected macrophages.
gene_id	gene_name	gene_description	locus	log2FoldChange	FoldChange	pvalue	padj	CCM0.7.8A	CCM0.7.8B	CCM0.7.8C	CCM0.1H.8A	CCM0.1H.8B	CCM0.1H.8C
NCLIV_000010	NCLIV_000010	putative+heat+shock+protein+90	FR823380:15453-22922	-0.146637	-1.10699	0.285926	0.515252	242.033	192.664	328.922	181.052	97.355	131.483
NCLIV_000020	NCLIV_000020	putative+M+protein	FR823380:23563-31911	0.636037	1.55405	0.606201	0.811667	0.634079	0.504743	0.861712	0.88438	0.475546	0.642249
NCLIV_000030	NCLIV_000030	conserved+hypothetical+protein	FR823380:34077-39761	-0.165987	-1.12193	0.265528	0.491348	121.645	96.8328	165.316	89.777	48.2746	65.1973
NCLIV_000040	NCLIV_000040	putative+transmembrane+domain-containing+protein	FR823380:43707-47951	-0.237954	-1.17932	0.0307059	0.106584	437.102	347.944	594.021	306.923	165.038	222.892
NCLIV_000050	NCLIV_000050	conserved+hypothetical+protein	FR823380:50333-67055	-0.21703	-1.16234	0.202805	0.405393	84.3061	67.1099	114.572	60.0491	32.2895	43.6085
NCLIV_000060	NCLIV_000060	putative+3',+5'-cyclic+nucleotide+phosphodiesterase+domain-containing+protein	FR823380:71321-85323	0.648311	1.56733	1.20915e-07	2.04896e-06	189.871	151.142	258.035	246.519	132.557	179.025
NCLIV_000070	NCLIV_000070	conserved+hypothetical+protein	FR823380:89508-90998	0	1	1	1	0	0	0	0	0	0
NCLIV_000080	NCLIV_000080	conserved+hypothetical+protein	FR823380:93992-104253	1.99179	3.9773	8.9358e-14	3.82904e-12	13.9611	11.1134	18.9731	46.3535	24.9251	33.6626
NCLIV_000090	NCLIV_000090	conserved+hypothetical+protein	FR823380:107536-108816	0.208853	1.15577	0.227672	0.440685	70.9558	56.4826	96.4288	67.9333	36.5289	49.3341
NCLIV_000100	NCLIV_000100	putative+sybindin-like+family+domain-containing+protein	FR823380:109004-110206	-0.00829287	-1.00576	0.970996	1	39.1828	31.1905	53.2494	32.2618	17.3477	23.429
NCLIV_000110	NCLIV_000110	arabinogalactan+protein,+related	FR823380:112338-119877	0.294014	1.22605	0.0527363	0.158741	100.301	79.8419	136.309	101.867	54.7754	73.9769
NCLIV_000120	NCLIV_000120	conserved+hypothetical+protein	FR823380:122226-132266	-0.0589646	-1.04172	0.705045	0.880067	102.55	81.6324	139.365	81.5205	43.8349	59.2013
NCLIV_000130	NCLIV_000130	hypothetical+protein	FR823380:135373-140309	-0.173585	-1.12786	0.0880946	0.233251	615.951	490.313	837.077	452.254	243.185	328.433
NCLIV_000140	NCLIV_000140	inositol-1,4,5-trisphosphate+5-phosphatase+2,+related	FR823380:144578-150939	0.739204	1.66925	4.88532e-08	9.12907e-07	127.602	101.575	173.411	176.477	94.8947	128.16
NCLIV_000150	NCLIV_000150	conserved+hypothetical+protein	FR823380:153974-155100	-0.360113	-1.28353	0.275918	0.504102	19.9706	15.8971	27.14	12.8575	6.91369	9.33728
NCLIV_000160	NCLIV_000160	putative+zinc+finger+DHHC+domain-containing+protein	FR823380:159529-166900	-0.119427	-1.0863	0.592933	0.804679	43.4508	34.588	59.0497	33.115	17.8065	24.0485
NCLIV_000170	NCLIV_000170	conserved+hypothetical+protein	FR823380:169260-175558	-0.968842	-1.95727	1.26957e-05	0.00013581	69.3311	55.1894	94.221	29.2756	15.742	21.2604
NCLIV_000180	NCLIV_000180	conserved+hypothetical+protein	FR823380:179208-183072	0.540238	1.45421	0.000267607	0.00197162	88.7807	70.6717	120.653	106.974	57.522	77.6863
NCLIV_000190	NCLIV_000190	conserved+hypothetical+protein	FR823380:187823-191812	-2.3942	-5.25686	0.172535	0.36411	0.63458	0.505142	0.862394	0	0	0
NCLIV_000200	NCLIV_000200	hypothetical+protein	FR823380:193889-198745	-1.0525	-2.07412	0.405665	0.6302	1.26722	1.00874	1.72215	0.441931	0.237634	0.320936
NCLIV_000210	NCLIV_000210	hypothetical+protein	FR823380:204228-207575	1.15693	2.22982	0.00213635	0.0119944	8.52356	6.78497	11.5835	15.8906	8.54462	11.5399
NCLIV_000220	NCLIV_000220	putative+pyruvate+dehydrogenase+(lipoamide)+kinase	FR823380:212384-215612	0.520994	1.43494	2.81428e-05	0.000274291	368.262	293.146	500.468	437.674	235.345	317.845
NCLIV_000230	NCLIV_000230	conserved+hypothetical+protein	FR823380:220540-228657	0.0787041	1.05607	0.634992	0.832987	106.403	84.6995	144.602	93.0657	50.043	67.5856
NCLIV_000240	NCLIV_000240	putative+WW+domain+containing+protein	FR823380:233545-235455	-0.0861807	-1.06156	0.596526	0.808085	93.4937	74.4234	127.058	72.9285	39.2149	52.9617
NCLIV_000250	NCLIV_000250	putative+ribosomal+protein+L20	FR823380:237067-237432	-0.337743	-1.26378	0.153381	0.347458	43.1098	34.3165	58.5862	28.2238	15.1764	20.4965
NCLIV_000260	NCLIV_000260	conserved+hypothetical+protein	FR823380:239747-250500	0.0891692	1.06376	0.498516	0.716968	183.568	146.125	249.469	161.722	86.9607	117.445
NCLIV_000270	NCLIV_000270	conserved+hypothetical+protein	FR823380:256048-259875	-0.14643	-1.10683	0.564706	0.776399	38.58	30.7107	52.4302	28.8562	15.5165	20.9558
NCLIV_000280	NCLIV_000280	ranbp1+domain+containing+protein,+related	FR823380:260963-263403	-0.371435	-1.29364	0.00264733	0.0144182	281.544	224.116	382.618	180.206	96.8998	130.868
NCLIV_000290	NCLIV_000290	putative+mitochondrial+carrier+domain-containing+protein	FR823380:265611-267942	-0.248444	-1.18793	0.36595	0.588933	30.0118	23.8902	40.786	20.9016	11.2392	15.1791
NCLIV_000300	NCLIV_000300	conserved+hypothetical+protein	FR823380:269681-271050	-0.829639	-1.77724	7.7871e-14	3.3561e-12	566.43	450.893	769.779	263.885	141.896	191.637
NCLIV_000310	NCLIV_000310	putative+arginine+N-methyltransferase	FR823380:274950-276803	-0.248783	-1.1882	0.272048	0.498817	44.4458	35.38	60.4018	30.9578	16.6465	22.482
NCLIV_000320	NCLIV_000320	hypothetical+protein	FR823380:278802-280577	0.418943	1.33695	0.195855	0.397142	16.3465	13.0122	22.2149	18.1388	9.75356	13.1727
NCLIV_000330	NCLIV_000330	conserved+hypothetical+protein	FR823380:282208-286323	-1.7827	-3.4407	3.94764e-07	5.98244e-06	29.7885	23.7124	40.4826	7.08196	3.80809	5.14302
NCLIV_000340	NCLIV_000340	hypothetical+protein	FR823380:289748-292805	0.330374	1.25734	0.149275	0.340944	34.7573	27.6677	47.2352	36.2226	19.4775	26.3054
NCLIV_000350	NCLIV_000350	conserved+hypothetical+protein	FR823380:294461-295216	0.121678	1.088	0.554799	0.768082	49.7446	39.598	67.6029	44.8311	24.1064	32.5569
NCLIV_000360	NCLIV_000360	conserved+hypothetical+protein	FR823380:295483-296048	0.436538	1.35335	0.106393	0.26863	22.453	17.8732	30.5136	25.2078	13.5547	18.3062
NCLIV_000370	NCLIV_000370	conserved+hypothetical+protein	FR823380:298221-299945	3.03303	8.18525	0.0471825	0.146929	0	0	0	0.886792	0.476843	0.644001
NCLIV_000380	NCLIV_000380	potential+mitochondrial+membrane+protein,related	FR823380:302613-304271	2.79675	6.94874	0.000179354	0.00139589	0.950635	0.75673	1.29191	6.20446	3.33624	4.50576
NCLIV_000390	NCLIV_000390	conserved+hypothetical+protein	FR823380:305636-306874	0.601838	1.51765	1.81747e-12	6.84395e-11	1492.37	1187.96	2028.13	1875.72	1008.6	1362.17
NCLIV_000400	NCLIV_000400	conserved+hypothetical+protein	FR823380:309430-310692	0.517907	1.43188	0.0291875	0.10241	31.4753	25.0551	42.7749	37.3763	20.0979	27.1432
NCLIV_000410	NCLIV_000410	hypothetical+protein	FR823380:314738-317519	-2.39155	-5.24719	0.172851	0.36411	0.63341	0.504211	0.860804	0	0	0
NCLIV_000420	NCLIV_000420	putative+DNA+ligase	FR823380:319860-329969	0.511761	1.42579	0.0229269	0.0850462	35.0757	27.9211	47.6678	41.4693	22.2988	30.1156
NCLIV_000430	NCLIV_000430	conserved+hypothetical+protein	FR823380:334039-337105	0.576068	1.49078	1.1973e-05	0.000129378	142.543	113.468	193.715	176.041	94.66	127.843
NCLIV_000440	NCLIV_000440	molybdopterin+biosynthesis+protein,+related	FR823380:338990-342736	1.02838	2.03973	7.80867e-08	1.37315e-06	47.5409	37.8438	64.608	80.4339	43.2507	58.4122
NCLIV_000450	NCLIV_000450	conserved+hypothetical+protein	FR823380:347404-348123	-0.312278	-1.24167	0.337344	0.557332	20.5953	16.3944	27.989	13.712	7.37319	9.95785
NCLIV_000460	NCLIV_000460	conserved+hypothetical+protein	FR823380:352161-367207	0.695374	1.6193	0.0606321	0.176247	10.4891	8.3496	14.2547	14.143	7.60491	10.2708
NCLIV_000470	NCLIV_000470	putative+poly(ADP)-ribose+polymerase+domain-containing+protein	FR823380:369847-371324	-0.150908	-1.11027	0.516686	0.736036	44.5218	35.4405	60.5051	33.1968	17.8505	24.108
NCLIV_000480	NCLIV_000480	conserved+hypothetical+protein	FR823380:375288-379189	0.111019	1.07999	0.536511	0.753164	70.7372	56.3087	96.1319	63.275	34.0241	45.9512
NCLIV_000490	NCLIV_000490	conserved+hypothetical+protein	FR823380:381508-386786	-0.0542172	-1.0383	0.694308	0.873567	158.073	125.83	214.82	126.073	67.7916	91.5559
NCLIV_000500	NCLIV_000500	conserved+hypothetical+protein	FR823380:392058-400328	0.885916	1.84794	0.00832514	0.0377798	12.0616	9.60137	16.3918	18.5635	9.98191	13.4811
NCLIV_000510	NCLIV_000510	putative+translocation+protein+sec62	FR823380:403070-408695	-0.176856	-1.13042	0.156125	0.34968	237.778	189.277	323.14	174.18	93.6597	126.492
NCLIV_000520	NCLIV_000520	conserved+hypothetical+protein	FR823380:412151-413414	-0.0832162	-1.05938	0.576643	0.789034	110.777	88.1815	150.546	86.5905	46.5612	62.8832
NCLIV_000530	NCLIV_000530	3-oxoacyl-(Acyl-carrier-protein)+synthase+II,related	FR823380:417648-423323	-1.68383	-3.2128	1.51144e-19	1.26621e-17	127.553	101.535	173.344	32.7928	17.6333	23.8146
NCLIV_000540	NCLIV_000540	50s+ribosomal+protein+L27,+chloroplastic,related	FR823380:424848-426864	-0.371053	-1.2933	0.0747297	0.206319	70.285	55.9486	95.5172	44.9772	24.185	32.6631
NCLIV_000550	NCLIV_000550	putative+dihydroorotase+protein	FR823380:427957-432295	0.197665	1.14684	0.365017	0.587938	43.6217	34.724	59.2819	41.4484	22.2875	30.1004
NCLIV_000560	NCLIV_000560	conserved+hypothetical+protein	FR823380:435656-438157	3.02824	8.15811	0.047416	0.146929	0	0	0	0.883848	0.47526	0.641862
NCLIV_000570	NCLIV_000570	conserved+hypothetical+protein	FR823380:439585-447617	0.00779214	1.00542	0.951878	1	196.192	156.174	266.625	163.355	87.839	118.631
NCLIV_000580	NCLIV_000580	conserved+hypothetical+protein	FR823380:468988-470031	0.0714502	1.05077	0.783443	0.926463	28.4674	22.6608	38.6872	24.7778	13.3235	17.994
NCLIV_000590	NCLIV_000590	putative+transcription+elongation+factor+TFIIS	FR823380:476435-477691	-0.41164	-1.3302	0.00706187	0.0328467	118.354	94.2131	160.843	73.6534	39.6047	53.4881
NCLIV_000600	NCLIV_000600	conserved+hypothetical+protein	FR823380:482351-485615	-0.823581	-1.76979	0.000642663	0.00424044	50.1337	39.9077	68.1317	23.4058	12.5857	16.9976
NCLIV_000610	NCLIV_000610	putative+profilin+family+protein	FR823380:489311-490647	-0.362787	-1.28591	0.000124878	0.00103339	1159.94	923.339	1576.35	746.986	401.667	542.472
NCLIV_000620	NCLIV_000620	conserved+hypothetical+protein	FR823380:492194-495891	0.14662	1.10697	0.406076	0.630251	69.9443	55.6775	95.0543	64.133	34.4854	46.5743
NCLIV_000630	NCLIV_000630	conserved+hypothetical+protein	FR823380:498222-499676	-0.10387	-1.07465	0.495845	0.713986	119.281	94.9509	162.103	91.9114	49.4223	66.7473
NCLIV_000640	NCLIV_000640	conserved+hypothetical+protein	FR823380:502748-504451	0.036441	1.02558	0.743694	0.900452	352.909	280.924	479.603	299.738	161.174	217.674
NCLIV_000650	NCLIV_000650	unspecified+product	FR823380:510387-516694	0.38299	1.30404	0.00102151	0.00634168	251.32	200.057	341.543	271.446	145.961	197.127
NCLIV_000660	NCLIV_000660	putative+transporter,+major+facilitator+family+domain-containing+protein	FR823380:522068-527633	-0.140668	-1.10242	0.496723	0.715113	57.8378	46.0403	78.6015	43.4374	23.3571	31.5449
NCLIV_000670	NCLIV_000670	putative+RNA+recognition+motif+domain-containing+protein	FR823380:531269-533366	0.00652702	1.00453	0.976388	1	43.8082	34.8725	59.5354	36.4452	19.5972	26.467
NCLIV_000680	NCLIV_000680	conserved+hypothetical+protein	FR823380:543614-551900	0.48696	1.40149	0.000569228	0.00382357	157.32	125.231	213.798	182.642	98.2099	132.637
NCLIV_000690	NCLIV_000690	hypothetical+protein	FR823380:554096-561612	0.0803334	1.05726	0.528713	0.745874	186.41	148.387	253.331	163.221	87.7669	118.534
NCLIV_000700	NCLIV_000700	putative+protein+kinase+(incomplete+catalytic+triad)	FR823380:563464-575585	0.280074	1.21426	0.0497537	0.152159	115.251	91.7429	156.626	115.92	62.3323	84.1828
NCLIV_000710	NCLIV_000710	conserved+hypothetical+protein	FR823380:580481-583755	0.524537	1.43847	2.42428e-09	5.77491e-08	1201.13	956.13	1632.34	1430.91	769.425	1039.15
NCLIV_000711	NCLIV_000711	conserved+hypothetical+protein	FR823380:584512-591943	0.359365	1.28286	0.57806	0.790829	3.76165	2.99437	5.11209	4.02816	2.16601	2.9253
NCLIV_000712	NCLIV_000712	conserved+hypothetical+protein	FR823380:593628-600459	0.170692	1.1256	0.383625	0.606383	59.964	47.7329	81.491	55.9126	30.0652	40.6045
NCLIV_000715	NCLIV_000715	unspecified+product	FR823380:604928-606097	0.675218	1.59684	0.526754	0.744686	0.948643	0.755144	1.28921	1.32753	0.713833	0.964067
NCLIV_000720	NCLIV_000720	putative+DHHC+zinc+finger+domain-containing+protein	FR823380:610708-619040	-0.469052	-1.3842	0.00382249	0.0196691	105.865	84.2712	143.87	63.3026	34.0389	45.9712
NCLIV_000725	NCLIV_000725	putative+DHHC+zinc+finger+domain-containing+protein	FR823380:622107-623872	0.549736	1.46382	3.32546e-07	5.10178e-06	375.413	298.839	510.187	455.152	244.743	330.538
NCLIV_000730	NCLIV_000730	putative+EF+hand+domain-containing+protein	FR823380:628176-629486	0.466038	1.38131	0.000276181	0.00202918	291.779	232.264	396.528	333.821	179.501	242.425
NCLIV_000740	NCLIV_000740	class+I+chitinase,+related	FR823380:632114-637090	0.548346	1.46241	3.18118e-08	6.16075e-07	497.584	396.09	676.217	602.673	324.067	437.669
NCLIV_000750	NCLIV_000750	conserved+hypothetical+protein	FR823380:639324-640244	0.206401	1.15381	0.694088	0.873567	6.00276	4.77835	8.15774	5.75405	3.09405	4.17867
NCLIV_000760	NCLIV_000760	conserved+hypothetical+protein	FR823380:642090-643004	1.9115	3.762	0.126391	0.301976	0.316536	0.25197	0.430172	1.32649	0.713274	0.963312
NCLIV_000770	NCLIV_000770	ga25361,+related	FR823380:645715-648361	-0.194362	-1.14422	0.889071	0.991364	0.63341	0.504211	0.860804	0.442555	0.23797	0.32139
NCLIV_000780	NCLIV_000780	carboxyvinyl-carboxyphosphonate+phosphorylmutase+protein,+related	FR823380:650835-654115	1.50816	2.84447	1.59182e-14	7.5596e-13	34.6805	27.6065	47.1307	81.9205	44.0501	59.4918
NCLIV_000790	NCLIV_000790	hypothetical+protein	FR823380:656365-664993	0.170477	1.12543	0.28596	0.515252	83.3605	66.3571	113.287	77.7088	41.7854	56.4332
NCLIV_000800	NCLIV_000800	hypothetical+protein	FR823380:669971-673175	1.32365	2.50299	2.5502e-09	6.03628e-08	28.0215	22.3059	38.0812	58.2673	31.3313	42.3145
NCLIV_000810	NCLIV_000810	conserved+hypothetical+protein	FR823380:677831-683510	0.93046	1.90588	0.230334	0.44434	1.89155	1.50572	2.57061	3.09601	1.66478	2.24836
NCLIV_000820	NCLIV_000820	conserved+hypothetical+protein	FR823380:689828-693142	-0.389928	-1.31033	0.632537	0.831918	2.85865	2.27556	3.8849	1.77695	0.955497	1.29045
NCLIV_000830	NCLIV_000830	conserved+hypothetical+protein	FR823380:694687-697392	-0.715361	-1.64189	0.000603044	0.00402173	69.0609	54.9742	93.8537	34.7849	18.7044	25.2613
NCLIV_000840	NCLIV_000840	thioredoxin+h,+related	FR823380:698930-700189	0.290846	1.22336	0.00174586	0.00999005	1055.76	840.415	1434.78	1069.64	575.162	776.784
NCLIV_000850	NCLIV_000850	conserved+hypothetical+protein	FR823380:703986-711932	-0.687645	-1.61065	0.603303	0.811667	0.948878	0.755331	1.28952	0.441081	0.237177	0.320319
NCLIV_000860	NCLIV_000860	spatr,+related	FR823380:714117-718555	0.39108	1.31137	0.000226733	0.00171801	552.263	439.616	750.526	599.799	322.522	435.582
NCLIV_000870	NCLIV_000870	sua5/YciO/YrdC/YwlC+family+protein,+related	FR823380:720380-723487	0.0687718	1.04882	0.802313	0.940756	30.7919	24.5111	41.8462	26.7495	14.3837	19.4258
NCLIV_000880	NCLIV_000880	hypothetical+protein	FR823380:726483-731210	0.268881	1.20487	0.179588	0.372791	53.4376	42.5377	72.6217	53.3454	28.6847	38.7402
NCLIV_000890	NCLIV_000890	er+lumen+protein+retaining+receptor+2,+related	FR823380:737544-740838	-0.0938436	-1.06721	0.640898	0.836432	60.6298	48.2629	82.3959	47.0403	25.2944	34.1613
NCLIV_000900	NCLIV_000900	conserved+hypothetical+protein	FR823380:742571-746681	-1.61323	-3.05936	2.46807e-07	3.92365e-06	37.9655	30.2215	51.5951	10.1936	5.48128	7.40274
NCLIV_000910	NCLIV_000910	conserved+hypothetical+protein	FR823380:748227-755324	0.206912	1.15421	0.164855	0.356278	102.586	81.6613	139.415	98.0763	52.7373	71.2243
NCLIV_000920	NCLIV_000920	putative+tRNA(guanine-N(7)-)-methyltransferase	FR823380:758664-764777	1.91697	3.77628	3.4882e-31	4.81629e-29	44.3999	35.3435	60.3395	139.195	74.8478	101.086
NCLIV_000930	NCLIV_000930	3-hydroxyisobutyryl-CoA+hydrolase/+catalytic,related	FR823380:766855-774793	0.210611	1.15718	0.310742	0.542216	46.7848	37.2419	63.5805	44.8528	24.1181	32.5727
NCLIV_000940	NCLIV_000940	putative+Glucose-6-phosphate+dehydrogenase	FR823380:778953-786336	0.53257	1.4465	5.28431e-11	1.65546e-09	3881.28	3089.6	5274.66	4649.48	2500.11	3376.52
NCLIV_000950	NCLIV_000950	conserved+hypothetical+protein	FR823380:789838-797935	0.248013	1.18757	0.759435	0.912596	2.22215	1.76889	3.0199	2.2088	1.18771	1.60406
NCLIV_000960	NCLIV_000960	conserved+hypothetical+protein	FR823380:800734-801810	-0.00618075	-1.00429	0.974495	1	68.7257	54.7074	93.3982	56.6702	30.4725	41.1547
NCLIV_000970	NCLIV_000970	hypothetical+protein	FR823380:805618-813144	1.05494	2.07763	0.291109	0.521743	0.950624	0.756721	1.2919	1.7685	0.950954	1.28431
NCLIV_000980	NCLIV_000980	conserved+hypothetical+protein	FR823380:818444-818770	0.0237968	1.01663	0.841315	0.96459	269.458	214.495	366.193	226.863	121.988	164.751
NCLIV_000990	NCLIV_000990	conserved+hypothetical+protein	FR823380:822700-832948	1.36743	2.58011	0.00104705	0.00647101	6.31691	5.02842	8.58468	13.6914	7.36209	9.94287
NCLIV_001000	NCLIV_001000	conserved+hypothetical+protein	FR823380:837604-843136	-1.06198	-2.0878	0.00101465	0.00630436	28.0449	22.3245	38.113	11.0594	5.94685	8.03152
NCLIV_001010	NCLIV_001010	hypothetical+protein	FR823380:846814-848567	-1.64645	-3.13063	0.334245	0.555356	0.31746	0.252706	0.431428	0	0	0
NCLIV_001020	NCLIV_001020	protein+arginine+methyltransferase,+related	FR823380:853138-858014	0.299804	1.23098	0.249482	0.469614	25.9274	20.6389	35.2353	26.4594	14.2277	19.2152
NCLIV_001030	NCLIV_001030	hypothetical+protein	FR823380:861846-870351	-0.01213	-1.00844	0.950646	1	59.0073	46.9713	80.1909	48.4561	26.0557	35.1895
NCLIV_001040	NCLIV_001040	putative+der1-like+family+domain-containing+protein,conserved	FR823380:874147-875354	-0.253303	-1.19193	0.117931	0.28813	111.684	88.9031	151.778	77.5758	41.7138	56.3366
NCLIV_001050	NCLIV_001050	hypothetical+protein	FR823380:880560-894307	-0.132022	-1.09583	0.337042	0.557186	148.943	118.562	202.413	112.548	60.5189	81.7338
NCLIV_001060	NCLIV_001060	putative+TPR+domain-containing+protein	FR823380:897746-907877	0.386365	1.3071	0.303992	0.53626	11.4006	9.07521	15.4935	12.3784	6.6561	8.98939
NCLIV_001070	NCLIV_001070	histone+H2B,+related	FR823380:909754-910104	1.00426	2.00591	9.52804e-09	2.06515e-07	58.7048	46.7305	79.7798	97.6434	52.5045	70.91
NCLIV_001080	NCLIV_001080	hypothetical+protein	FR823380:914802-922436	0.209475	1.15627	0.240649	0.457643	66.2934	52.7713	90.0927	63.4985	34.1442	46.1135
NCLIV_001090	NCLIV_001090	cora-like+Mg2++transporter+domain-containing+protein,+related	FR823380:926052-931221	-0.318229	-1.2468	0.0884086	0.233833	73.7245	58.6866	100.192	48.9445	26.3183	35.5442
NCLIV_001100	NCLIV_001100	hypothetical+protein	FR823380:933676-941887	0.190996	1.14155	0.174634	0.366012	123.493	98.3035	167.827	116.763	62.7857	84.7952
NCLIV_001105	NCLIV_001105	unspecified+product	FR823380:944053-945142	2.19522	4.57958	0.160461	0.34968	0	0	0	0.441952	0.237645	0.320951
NCLIV_001110	NCLIV_001110	conserved+hypothetical+protein	FR823380:946952-951901	0.132818	1.09643	0.571728	0.783747	35.7525	28.4599	48.5876	32.4757	17.4627	23.5843
NCLIV_001120	NCLIV_001120	putative+XPA-binding+protein	FR823380:953408-960564	0.150814	1.1102	0.264731	0.49063	162.91	129.681	221.395	149.793	80.5464	108.782
NCLIV_001130	NCLIV_001130	hypothetical+protein	FR823380:963048-965700	0.308426	1.23836	0.0154234	0.0620597	189.631	150.951	257.708	194.501	104.587	141.249
NCLIV_001135	NCLIV_001135	hypothetical+protein	FR823380:968241-971318	0.675455	1.5971	2.02506e-06	2.64892e-05	99.4298	79.1487	135.125	131.582	70.7538	95.5566
NCLIV_001137	NCLIV_001137	unspecified+product	FR823380:974592-978064	-0.201518	-1.14991	0.146343	0.335941	154.103	122.67	209.426	110.966	59.6684	80.5851
NCLIV_001140	NCLIV_001140	putative+CMGC+kinase,+CK2+family	FR823380:980529-983478	-2.88265	-7.37506	0.0952409	0.24761	0.950617	0.756716	1.29189	0	0	0
NCLIV_001150	NCLIV_001150	elongation+factor+Ts,+related	FR823380:999021-1001541	-0.201608	-1.14998	0.331742	0.555356	54.0416	43.0185	73.4426	38.9014	20.9179	28.2507
NCLIV_001160	NCLIV_001160	conserved+hypothetical+protein	FR823380:1019487-1024718	-0.0564792	-1.03992	0.947602	1	2.22076	1.76778	3.01801	1.76405	0.94856	1.28108
NCLIV_001170	NCLIV_001170	putative+CBS+domain+multi-pass+transmembrane+protein	FR823380:1026844-1033667	0.508459	1.42253	0.00160086	0.00932503	75.9554	60.4624	103.223	89.5323	48.1431	65.0196
NCLIV_001180	NCLIV_001180	cbr-GPDH-1+protein,+related	FR823380:1037160-1042435	-0.237284	-1.17877	0.0685864	0.194294	201.104	160.084	273.301	141.266	75.9611	102.589
NCLIV_001190	NCLIV_001190	conserved+hypothetical+protein	FR823380:1057686-1063537	0.389512	1.30995	0.0117915	0.0503536	86.4311	68.8014	117.46	93.8006	50.4382	68.1193
NCLIV_001200	NCLIV_001200	hypothetical+protein	FR823380:1066010-1070688	0.0837737	1.05979	0.637518	0.834816	71.0694	56.5731	96.5832	62.3823	33.544	45.3029
NCLIV_001210	NCLIV_001210	klla0c10076p,+related	FR823380:1072984-1078166	-0.029934	-1.02097	0.84581	0.966474	101.006	80.4034	137.267	81.9272	44.0537	59.4966
NCLIV_001220	NCLIV_001220	conserved+hypothetical+protein	FR823380:1082925-1088442	0.104369	1.07502	0.649534	0.843434	40.8309	32.5025	55.4892	36.3602	19.5515	26.4053
NCLIV_001225	NCLIV_001225	unspecified+product	FR823380:1094361-1096623	1.33311	2.51945	1.02262e-08	2.19732e-07	23.386	18.6158	31.7815	48.9809	26.3378	35.5706
NCLIV_001230	NCLIV_001230	protein+phosphatase+2C-like+domain-containing+protein,+related	FR823380:1104517-1116307	0.343113	1.26849	0.0101628	0.044599	305.825	243.445	415.616	321.301	172.769	233.333
NCLIV_001240	NCLIV_001240	hypothetical+protein	FR823380:1122446-1132073	0.0809638	1.05772	0.526945	0.744797	226.544	180.335	307.874	198.448	106.709	144.116
NCLIV_001250	NCLIV_001250	putative+guanylate+binding+protein	FR823380:1135537-1146057	-0.568575	-1.48306	0.000148652	0.00119692	136.425	108.598	185.401	76.1393	40.9414	55.2934
NCLIV_001260	NCLIV_001260	putative+RNA+binding+protein	FR823380:1151006-1152346	-0.277281	-1.21191	0.258856	0.482483	36.892	29.367	50.1362	25.1883	13.5442	18.2921
NCLIV_001270	NCLIV_001270	conserved+hypothetical+protein	FR823380:1155307-1164330	0.568818	1.48331	3.43996e-05	0.000327984	115.151	91.6629	156.49	141.51	76.0921	102.766
NCLIV_001280	NCLIV_001280	putative+ribokinase	FR823380:1168697-1170395	-0.202089	-1.15036	0.437736	0.660398	32.967	26.2426	44.8021	23.7173	12.7532	17.2238
NCLIV_001290	NCLIV_001290	conserved+hypothetical+protein	FR823380:1173285-1185228	-0.217108	-1.1624	0.143355	0.330506	124.871	99.4005	169.7	88.9458	47.8277	64.5937
NCLIV_001300	NCLIV_001300	putative+calmodulin	FR823380:1187980-1188381	-0.0794598	-1.05662	0.470039	0.688934	536.826	427.327	729.546	420.737	226.237	305.545
NCLIV_001310	NCLIV_001310	putative+tubulin-specific+chaperone	FR823380:1190310-1192537	0.132388	1.09611	0.352591	0.574468	126.007	100.305	171.244	114.393	61.5108	83.0734
NCLIV_001320	NCLIV_001320	conserved+hypothetical+protein	FR823380:1193414-1195883	0.0722419	1.05135	0.723987	0.885506	68.891	54.839	93.6228	59.988	32.2566	43.5641
NCLIV_001330	NCLIV_001330	conserved+hypothetical+protein	FR823380:1211547-1212164	-0.480838	-1.39555	0.0402594	0.131367	54.4978	43.3816	74.0625	32.3046	17.3707	23.46
NCLIV_001340	NCLIV_001340	putative+oxysterol-binding+protein+domain-containing+protein	FR823380:1216631-1221213	2.2068	4.61649	1.52513e-07	2.51578e-06	4.70409	3.74458	6.39286	18.4259	9.90795	13.3812
NCLIV_001350	NCLIV_001350	putative+EGF-like+domain-containing+protein	FR823380:1223647-1229239	1.82738	3.54892	0.000278117	0.00204098	3.49336	2.7808	4.74747	10.5828	5.69054	7.68536
NCLIV_001360	NCLIV_001360	conserved+hypothetical+protein	FR823380:1232909-1235770	0.175905	1.12967	0.132003	0.311613	285.569	227.32	388.088	267.174	143.664	194.026
NCLIV_001370	NCLIV_001370	putative+DEAD/DEAH+box+helicase	FR823380:1238442-1256845	0.0825195	1.05887	0.528004	0.745465	178.78	142.313	242.962	156.778	84.3021	113.854
NCLIV_001380	NCLIV_001380	ubiquitin+carboxyl-terminal+hydrolase,+related	FR823380:1259789-1266398	-0.075363	-1.05363	0.603505	0.811667	124.215	98.8786	168.809	97.6261	52.4952	70.8974
NCLIV_001390	NCLIV_001390	conserved+putative+aminotransferase+class+V+domain-containing+protein	FR823380:1270137-1272964	0.235724	1.1775	0.376666	0.599123	25.3286	20.1622	34.4216	24.7206	13.2927	17.9525
NCLIV_001395	NCLIV_001395	conserved+putative+aminotransferase+class+V+domain-containing+protein	FR823380:1275977-1286253	0.72406	1.65182	0.0633275	0.182375	10.7933	8.59171	14.668	14.8418	7.9807	10.7783
NCLIV_001397	NCLIV_001397	unspecified+product	FR823380:1287970-1290048	0.387695	1.3083	0.152848	0.347026	27.576	21.9512	37.4757	29.9132	16.0848	21.7234
NCLIV_001400	NCLIV_001400	unspecified+product	FR823380:1292581-1302111	1.71443	3.28167	2.64588e-43	6.5759e-41	135.331	107.727	183.914	368.067	197.916	267.295
NCLIV_001410	NCLIV_001410	conserved+hypothetical+protein	FR823380:1307178-1309960	1.88761	3.70022	4.33657e-17	2.78737e-15	20.3192	16.1746	27.6137	62.5985	33.6603	45.4599
NCLIV_001420	NCLIV_001420	putative+programmed+cell+death+protein	FR823380:1311858-1314406	0.305763	1.23607	0.13176	0.311181	47.4321	37.7571	64.4602	48.5824	26.1236	35.2812
NCLIV_001430	NCLIV_001430	f3f19.18,+related	FR823380:1316361-1323970	-0.0105969	-1.00737	0.954109	1	78.1883	62.2399	106.258	64.2752	34.5619	46.6776
NCLIV_001440	NCLIV_001440	nol1/NOP2/sun+family+methyltransferase,+related	FR823380:1325285-1336020	-0.232413	-1.1748	0.362049	0.584655	32.6324	25.9762	44.3474	22.9848	12.3593	16.6919
NCLIV_001450	NCLIV_001450	hypothetical+protein	FR823380:1341731-1366906	0.357715	1.28139	0.000946992	0.00595846	441.401	351.366	599.863	468.439	251.888	340.187
NCLIV_001460	NCLIV_001460	unspecified+product	FR823380:1368923-1369915	0.370089	1.29243	0.0133216	0.0553655	103.398	82.3071	140.517	110.704	59.5274	80.3948
NCLIV_001470	NCLIV_001470	putative+rhodanese-like+domain+containing+protein	FR823380:1375239-1378710	1.9413	3.8405	1.2133e-23	1.23923e-21	32.1017	25.5538	43.6262	102.446	55.0869	74.3976
NCLIV_001480	NCLIV_001480	conserved+hypothetical+protein	FR823380:1383218-1384411	2.19522	4.57958	0.160461	0.34968	0	0	0	0.441952	0.237645	0.320951
NCLIV_001490	NCLIV_001490	conserved+hypothetical+protein	FR823380:1385826-1392162	0.340763	1.26643	0.380681	0.603264	12.2157	9.72405	16.6012	12.8429	6.90584	9.32668
NCLIV_001500	NCLIV_001500	hypothetical+protein	FR823380:1394272-1395972	3.02824	8.15811	0.047416	0.146929	0	0	0	0.883848	0.47526	0.641862
NCLIV_001510	NCLIV_001510	conserved+hypothetical+protein	FR823380:1398751-1404045	-0.419022	-1.33702	0.00459728	0.0229587	133.211	106.039	181.034	82.4788	44.3503	59.8972
NCLIV_001520	NCLIV_001520	eukaryotic+translation+initiation+factor+3+subunit+C,+related	FR823380:1408194-1414584	-0.267397	-1.20363	0.0138065	0.0572216	467.692	372.295	635.593	321.768	173.02	233.672
NCLIV_001530	NCLIV_001530	hypothetical+protein	FR823380:1418998-1420518	0.552461	1.46659	0.00171136	0.00982792	71.7785	57.1375	97.5469	87.2342	46.9073	63.3507
NCLIV_001540	NCLIV_001540	putative+PH+domain-containing+protein	FR823380:1420709-1426783	0.324154	1.25193	0.0131789	0.0549565	158.881	126.473	215.919	164.756	88.5921	119.648
NCLIV_001550	NCLIV_001550	putative+ribonucleoside-diphosphate+reductase,+large+subunit	FR823380:1430960-1436008	-0.927907	-1.90251	2.40412e-16	1.43401e-14	583.478	464.464	792.947	253.923	136.538	184.402
NCLIV_001560	NCLIV_001560	hypothetical+protein	FR823380:1438268-1444967	0.0161706	1.01127	0.986992	1	1.57732	1.25559	2.14358	1.32207	0.710901	0.960107
NCLIV_001570	NCLIV_001570	eukaryotic+translation+initiation+factor+3+subunit+G-2,+related	FR823380:1445722-1458448	-0.39985	-1.31937	0.000684194	0.00447095	336.01	267.473	456.638	210.877	113.392	153.141
NCLIV_001580	NCLIV_001580	putative+rhomboid-like+protease+5	FR823380:1461291-1467532	0.123391	1.08929	0.338008	0.558304	453.186	360.748	615.88	408.826	219.833	296.895
NCLIV_001590	NCLIV_001590	hypothetical+protein	FR823380:1469715-1474629	-0.318412	-1.24696	0.1493	0.340944	57.1251	45.4731	77.633	37.9146	20.3873	27.5341
NCLIV_001600	NCLIV_001600	possible+RNA-binding+protein,+related	FR823380:1479258-1485253	-0.109301	-1.07871	0.460977	0.683092	128.329	102.153	174.399	98.5125	52.9719	71.5411
NCLIV_001610	NCLIV_001610	conserved+hypothetical+protein	FR823380:1489124-1492228	0.279323	1.21362	0.202355	0.404947	52.7936	42.0251	71.7465	53.0873	28.546	38.5527
NCLIV_001620	NCLIV_001620	conserved+hypothetical+protein	FR823380:1495023-1503073	-0.100566	-1.07219	0.562123	0.774153	88.7011	70.6084	120.545	68.5036	36.8356	49.7482
NCLIV_001630	NCLIV_001630	putative+armadillo/beta-catenin-like+repeat-containing+protein	FR823380:1507357-1521331	0.166519	1.12235	0.280302	0.509626	103.359	82.2765	140.465	96.0821	51.665	69.7761
NCLIV_001640	NCLIV_001640	conserved+hypothetical+protein	FR823380:1524528-1527840	-0.155051	-1.11346	0.433013	0.656209	63.043	50.1838	85.6754	46.8761	25.2061	34.0421
NCLIV_001650	NCLIV_001650	conserved+hypothetical+protein	FR823380:1532777-1535554	-0.131464	-1.0954	0.655579	0.846993	26.0057	20.7012	35.3417	19.6478	10.5649	14.2685
NCLIV_001660	NCLIV_001660	conserved+hypothetical+protein	FR823380:1540390-1541394	-0.012382	-1.00862	0.91243	1	502.416	399.936	682.783	412.514	221.816	299.573
NCLIV_001670	NCLIV_001670	elongation+factor+1-alpha,+related	FR823380:1542969-1544618	-0.805245	-1.74744	6.11295e-18	4.18148e-16	1451.21	1155.2	1972.19	687.699	369.787	499.416
NCLIV_001680	NCLIV_001680	putative+RRM+domain-containing+protein	FR823380:1549800-1552191	0.136642	1.09934	0.547506	0.762585	42.8107	34.0785	58.1798	38.9863	20.9636	28.3124
NCLIV_001690	NCLIV_001690	short-chain+dehydrogenase/reductase+SDR,+related	FR823380:1556802-1592881	0.520086	1.43404	0.362273	0.584655	4.4334	3.5291	6.02499	5.31812	2.85964	3.86209
NCLIV_001700	NCLIV_001700	conserved+hypothetical+protein	FR823380:1593295-1596996	-0.78053	-1.71776	0.000631946	0.00417712	56.1794	44.7202	76.3477	27.0328	14.536	19.6316
NCLIV_001710	NCLIV_001710	putative+zinc+finger+(CCCH+type)+protein	FR823380:1602271-1606234	-0.658615	-1.57857	0.00404791	0.0206862	52.1219	41.4904	70.8336	27.2989	14.6791	19.8248
NCLIV_001720	NCLIV_001720	lipocalin-like+protein,+related	FR823380:1610412-1611050	-1.7902	-3.45863	0.119592	0.290827	2.21563	1.7637	3.01104	0.442475	0.237926	0.321331
NCLIV_001730	NCLIV_001730	putative+actin-like+protein+7	FR823380:1612152-1613884	0.466528	1.38178	0.37612	0.598708	5.36321	4.26925	7.28859	6.18357	3.32501	4.4906
NCLIV_001740	NCLIV_001740	conserved+hypothetical+protein	FR823380:1618431-1626978	-0.73058	-1.65931	0.00100413	0.00625984	59.5678	47.4175	80.9526	29.6802	15.9596	21.5542
NCLIV_001750	NCLIV_001750	conserved+hypothetical+protein	FR823380:1630339-1632760	0.403376	1.3226	0.00054858	0.00372003	276.907	220.425	376.317	303.336	163.109	220.287
NCLIV_001760	NCLIV_001760	putative+N-glycosylase/DNA+lyase	FR823380:1637509-1642903	-0.749666	-1.6814	0.0306811	0.106548	21.4996	17.1142	29.2179	10.5397	5.66736	7.65405
NCLIV_001770	NCLIV_001770	putative+DNAK+family+domain+containing+protein	FR823380:1646176-1654294	-0.852306	-1.80538	0.000157362	0.00125218	59.0801	47.0293	80.2898	27.0448	14.5424	19.6403
NCLIV_001780	NCLIV_001780	hypothetical+protein	FR823380:1656969-1659515	-0.00286096	-1.00199	0.992525	1	21.993	17.507	29.8885	18.1772	9.77418	13.2005
NCLIV_001790	NCLIV_001790	putative+general+transcription+factor+IIH+polypeptide+2	FR823380:1661305-1667926	0.387206	1.30786	0.0692523	0.195363	46.6124	37.1047	63.3462	50.5218	27.1664	36.6896
NCLIV_001800	NCLIV_001800	putative+leucine+rich+repeat+protein	FR823380:1670878-1674766	-0.14325	-1.10439	0.448894	0.669818	73.0229	58.1281	99.2381	54.7463	29.438	39.7575
NCLIV_001810	NCLIV_001810	conserved+hypothetical+protein	FR823380:1676304-1678721	0.0778451	1.05544	0.756119	0.910028	35.0349	27.8887	47.6124	30.6289	16.4697	22.2431
NCLIV_001820	NCLIV_001820	conserved+hypothetical+protein	FR823380:1681080-1685423	-0.337357	-1.26344	0.103058	0.262164	59.1212	47.062	80.3457	38.7264	20.8239	28.1236
NCLIV_001830	NCLIV_001830	hypothetical+protein	FR823380:1688090-1690507	0.709103	1.63479	9.10335e-11	2.74796e-09	497.585	396.091	676.218	673.727	362.275	489.27
NCLIV_001840	NCLIV_001840	putative+sec1+family+domain-containing+protein	FR823380:1695165-1698975	-0.364177	-1.28715	0.156725	0.34968	37.6608	29.979	51.181	24.204	13.0149	17.5773
NCLIV_001850	NCLIV_001850	putative+ATP-dependent+RNA+helicase	FR823380:1699826-1702825	0.148402	1.10834	0.502487	0.721321	39.9206	31.7779	54.2521	36.655	19.71	26.6194
NCLIV_001860	NCLIV_001860	sterol+sensing+5-transmembrane+protein,+related	FR823380:1705468-1716286	0.726805	1.65497	0.216949	0.4259	3.81412	3.03614	5.18339	5.30867	2.85456	3.85523
NCLIV_001870	NCLIV_001870	conserved+hypothetical+protein	FR823380:1721108-1726091	-0.775383	-1.71164	0.00630058	0.0298267	33.0356	26.2972	44.8954	15.9321	8.56698	11.5701
NCLIV_001880	NCLIV_001880	hypothetical+protein	FR823380:1728841-1731527	-0.7575	-1.69056	0.00168762	0.00972402	50.8508	40.4786	69.1062	24.8585	13.3668	18.0526
NCLIV_001890	NCLIV_001890	hypothetical+protein	FR823380:1734247-1743516	-0.0472533	-1.0333	0.722713	0.884528	188.033	149.679	255.537	150.697	81.0325	109.438
NCLIV_001900	NCLIV_001900	putative+histidyl-tRNAsynthetase	FR823380:1746926-1750924	-1.54588	-2.91982	2.39247e-39	4.69429e-37	598.896	476.737	813.899	169.782	91.2949	123.298
NCLIV_001910	NCLIV_001910	conserved+hypothetical+protein	FR823380:1753778-1756592	0.165934	1.12189	0.390653	0.614754	56.2138	44.7477	76.3946	52.2425	28.0917	37.9392
NCLIV_001920	NCLIV_001920	putative+ATP-dependent+helicase	FR823380:1758174-1767485	0.262699	1.19972	0.0967711	0.250182	93.3789	74.332	126.902	92.801	49.9007	67.3933
NCLIV_001930	NCLIV_001930	conserved+hypothetical+protein	FR823380:1771257-1779557	-0.100146	-1.07188	0.495521	0.713752	141.028	112.262	191.657	108.952	58.5851	79.1221
NCLIV_001940	NCLIV_001940	conserved+hypothetical+protein	FR823380:1782698-1786975	0.775422	1.71169	4.68726e-07	6.97569e-06	95.9971	76.4162	130.46	136.165	73.2181	98.8847
NCLIV_001950	NCLIV_001950	unspecified+product	FR823380:1793066-1794763	1.14972	2.21871	2.45788e-08	4.86099e-07	41.4366	32.9846	56.3124	76.2828	41.0186	55.3976
NCLIV_001960	NCLIV_001960	phosphatidylinositol+4-kinase,+related	FR823380:1796773-1800197	0.405286	1.32435	0.0536728	0.161105	49.7519	39.6038	67.6128	54.6065	29.3628	39.656
NCLIV_001970	NCLIV_001970	unspecified+product	FR823380:1801552-1803336	0.0389166	1.02734	0.676608	0.860858	11837.4	9422.89	16087	10071.1	5415.4	7313.77
NCLIV_001980	NCLIV_001980	hypothetical+protein	FR823380:1812577-1822573	-0.0761416	-1.05419	0.549179	0.763648	194.581	154.891	264.435	152.85	82.1902	111.002
NCLIV_001990	NCLIV_001990	ubiquitin+carrier+protein,+related	FR823380:1838848-1842793	-0.137924	-1.10032	0.335771	0.556335	157.846	125.649	214.512	118.79	63.8755	86.267
NCLIV_002000	NCLIV_002000	conserved+hypothetical+protein	FR823380:1847210-1849291	-0.0377649	-1.02652	0.891071	0.992356	26.8671	21.3869	36.5123	21.6713	11.653	15.738
NCLIV_002010	NCLIV_002010	conserved+hypothetical+protein	FR823380:1850356-1851252	-0.66035	-1.58047	0.285603	0.51499	6.00044	4.77651	8.1546	3.0983	1.66601	2.25003
NCLIV_002020	NCLIV_002020	hypothetical+protein	FR823380:1855854-1859302	0.440167	1.35676	6.72066e-06	7.74486e-05	742.218	590.825	1008.67	833.993	448.452	605.657
NCLIV_002030	NCLIV_002030	conserved+hypothetical+protein	FR823380:1869594-1873503	-0.384089	-1.30504	0.00487569	0.0240431	252.894	201.31	343.683	160.451	86.2771	116.522
NCLIV_002040	NCLIV_002040	hypothetical+protein	FR823380:1874026-1874433	-0.284793	-1.21824	0.222772	0.433565	45.3541	36.103	61.6362	30.809	16.5665	22.3739
NCLIV_002050	NCLIV_002050	ekn1,+related	FR823380:1878833-1881275	-0.780131	-1.71729	0.313507	0.545381	3.77034	3.00129	5.12389	1.76609	0.949657	1.28256
NCLIV_002060	NCLIV_002060	putative+ATP-dependent+Clp+protease+adaptor+domain-containing+protein	FR823380:1885097-1887788	-0.198483	-1.14749	0.487303	0.706598	27.7677	22.1038	37.7363	20.0228	10.7666	14.5409
NCLIV_002070	NCLIV_002070	hypothetical+protein	FR823380:1889553-1903380	0.391594	1.31184	0.00332459	0.0175429	179.385	142.795	243.784	194.922	104.813	141.555
NCLIV_002080	NCLIV_002080	conserved+hypothetical+protein	FR823380:1906105-1914730	-0.219318	-1.16418	0.302585	0.534868	55.1598	43.9086	74.9621	39.2203	21.0895	28.4823
NCLIV_002090	NCLIV_002090	putative+CAM+kinase,+CDPK+family	FR823380:1920442-1931025	0.152781	1.11171	0.468525	0.68731	47.4123	37.7414	64.4333	43.6647	23.4792	31.7099
NCLIV_002100	NCLIV_002100	conserved+hypothetical+protein	FR823380:1936251-1947185	0.42674	1.34419	0.0312965	0.108131	51.3895	40.9073	69.8383	57.2488	30.7836	41.5748
NCLIV_002110	NCLIV_002110	putative+TPR+domain-containing+protein	FR823380:1948639-1952759	-2.05548	-4.15681	1.15196e-05	0.00012557	20.4853	16.3068	27.8395	3.98669	2.14371	2.89519
NCLIV_002115	NCLIV_002115	unspecified+product	FR823380:1956334-1960882	0.0919427	1.0658	0.698365	0.876693	36.1942	28.8115	49.1879	31.9541	17.1823	23.2055
NCLIV_002120	NCLIV_002120	hypothetical+protein	FR823380:1963706-1994038	0.281763	1.21568	0.024483	0.0893516	442.49	352.234	601.344	445.507	239.557	323.533
NCLIV_002130	NCLIV_002130	putative+ubiquinone/menaquinone+biosynthesis+methyltransferae	FR823380:1998753-2000150	-0.271732	-1.20726	0.227192	0.440329	48.2837	38.4351	65.6176	33.0997	17.7983	24.0375
NCLIV_002140	NCLIV_002140	wd+repeat+protein,+related	FR823380:2002225-2010854	0.16013	1.11739	0.355776	0.577295	87.1004	69.3341	118.369	80.6121	43.3465	58.5416
NCLIV_002150	NCLIV_002150	hypothetical+protein	FR823380:2015059-2016144	0	1	1	1	0	0	0	0	0	0
NCLIV_002160	NCLIV_002160	e3+ubiquitin-protein+ligase+ubr11,+related	FR823380:2019678-2038482	-0.299509	-1.23073	0.0914828	0.240598	91.0769	72.4995	123.773	61.2631	32.9422	44.4901
NCLIV_002170	NCLIV_002170	conserved+hypothetical+protein	FR823380:2041845-2045213	-0.531792	-1.44572	0.155899	0.34968	17.8192	14.1846	24.2163	10.1682	5.4676	7.38426
NCLIV_002180	NCLIV_002180	hypothetical+protein	FR823380:2049336-2051819	1.35735	2.56215	0.153411	0.347458	0.947044	0.753871	1.28703	2.2015	1.18378	1.59876
NCLIV_002190	NCLIV_002190	conserved+hypothetical+protein	FR823380:2055151-2056407	-0.101958	-1.07323	0.555932	0.768879	86.0439	68.4931	116.934	66.3863	35.6971	48.2106
NCLIV_002200	NCLIV_002200	putative+zinc+finger+(CCCH+type)+protein	FR823380:2061025-2065397	0.230846	1.17352	0.0520279	0.157053	278.511	221.702	378.496	270.689	145.554	196.578
NCLIV_002210	NCLIV_002210	putative+SET+domain-containing+protein	FR823380:2068990-2088704	-0.112793	-1.08132	0.44539	0.666583	117.615	93.6245	159.839	90.0676	48.4309	65.4083
NCLIV_002220	NCLIV_002220	srs+domain-containing+protein	FR823380:2091593-2092786	1.27867	2.42615	0.00331937	0.0175429	6.02432	4.79551	8.18705	12.281	6.60372	8.91866
NCLIV_002230	NCLIV_002230	srs+domain-containing+protein	FR823380:2095258-2096445	0	1	1	1	0	0	0	0	0	0
NCLIV_002240	NCLIV_002240	srs+domain-containing+protein	FR823380:2098912-2100120	2.19522	4.57958	0.160461	0.34968	0	0	0	0.441952	0.237645	0.320951
NCLIV_002250	NCLIV_002250	srs+domain-containing+protein	FR823380:2102552-2103769	0	1	1	1	0	0	0	0	0	0
NCLIV_002260	NCLIV_002260	srs+domain-containing+protein	FR823380:2106228-2107409	1.3812	2.60486	0.305594	0.536499	0.316536	0.25197	0.430172	0.880922	0.473687	0.639738
NCLIV_002270	NCLIV_002270	conserved+hypothetical+protein	FR823380:2111621-2117918	0.483512	1.39814	0.0124484	0.0526162	50.3328	40.0662	68.4022	58.3273	31.3636	42.3581
NCLIV_002280	NCLIV_002280	hypothetical+protein	FR823380:2121037-2144560	-0.0982382	-1.07047	0.443115	0.664849	205.786	163.811	279.663	159.193	85.6006	115.608
NCLIV_002290	NCLIV_002290	hypothetical+protein	FR823380:2149004-2149426	0.0679723	1.04824	0.741413	0.89915	56.8245	45.2338	77.2245	49.3336	26.5275	35.8267
NCLIV_002300	NCLIV_002300	conserved+hypothetical+protein	FR823380:2151569-2153062	0.129324	1.09378	0.440226	0.662668	85.1094	67.7492	115.664	77.1035	41.4599	55.9936
NCLIV_002310	NCLIV_002310	conserved+hypothetical+protein	FR823380:2154526-2155761	-0.387818	-1.30841	0.636102	0.833675	2.82538	2.24908	3.83969	1.75887	0.945777	1.27732
NCLIV_002320	NCLIV_002320	conserved+hypothetical+protein	FR823380:2157621-2158739	2.19522	4.57958	0.160461	0.34968	0	0	0	0.441952	0.237645	0.320951
NCLIV_002330	NCLIV_002330	conserved+hypothetical+protein	FR823380:2160263-2165125	-0.0245283	-1.01715	0.871904	0.983645	113.793	90.5823	154.645	92.6462	49.8175	67.2809
NCLIV_002340	NCLIV_002340	conserved+hypothetical+protein	FR823380:2169830-2177323	-0.0415947	-1.02925	0.796555	0.936326	92.361	73.5217	125.519	74.311	39.9583	53.9657
NCLIV_002350	NCLIV_002350	hypothetical+protein	FR823380:2178407-2183080	-0.896001	-1.8609	0.00807651	0.0368083	25.963	20.6673	35.2838	11.4974	6.18237	8.3496
NCLIV_002360	NCLIV_002360	conserved+hypothetical+protein	FR823380:2185569-2186759	2.19238	4.57058	0.160723	0.34968	0	0	0	0.441081	0.237177	0.320319
NCLIV_002370	NCLIV_002370	conserved+hypothetical+protein	FR823380:2189505-2200664	0.208446	1.15544	0.331758	0.555356	42.9289	34.1725	58.3404	41.0969	22.0985	29.8452
NCLIV_002380	NCLIV_002380	conserved+hypothetical+protein	FR823380:2206630-2208156	0.197261	1.14652	0.0396498	0.130221	726.06	577.962	986.715	689.398	370.701	500.65
NCLIV_002390	NCLIV_002390	nucleoside+diphosphate+kinase,related	FR823380:2209162-2210235	-0.966776	-1.95447	3.53017e-16	2.08896e-14	401.851	319.884	546.116	170.211	91.5251	123.609
NCLIV_002400	NCLIV_002400	hypothetical+protein	FR823380:2211954-2216013	-0.227505	-1.17081	0.117737	0.287914	127.776	101.713	173.648	90.3617	48.5891	65.6219
NCLIV_002420	NCLIV_002420	conserved+hypothetical+protein	FR823380:2219128-2231437	-0.203948	-1.15185	0.248652	0.468524	84.4999	67.2641	114.835	60.7375	32.6596	44.1084
NCLIV_002430	NCLIV_002430	conserved+hypothetical+protein	FR823380:2233633-2241750	-0.0665833	-1.04723	0.775228	0.921984	39.7932	31.6764	54.079	31.4618	16.9176	22.848
NCLIV_002440	NCLIV_002440	putative+tubulin-specific+chaperone+a	FR823380:2243014-2244089	-0.114103	-1.0823	0.626527	0.82826	42.1535	33.5553	57.2866	32.2445	17.3384	23.4164
NCLIV_002450	NCLIV_002450	hypothetical+protein	FR823381:9769-26273	-0.14009	-1.10197	0.424867	0.648544	78.6875	62.6373	106.936	59.123	31.7914	42.9359
NCLIV_002460	NCLIV_002460	conserved+hypothetical+protein	FR823381:26880-27896	2.84281	7.17414	0.00862381	0.0388514	0.31656	0.25199	0.430204	2.64241	1.42087	1.91895
NCLIV_002470	NCLIV_002470	conserved+hypothetical+protein	FR823381:34695-39027	0.280645	1.21474	0.0444015	0.141902	169.207	134.693	229.953	170.245	91.5434	123.634
NCLIV_002480	NCLIV_002480	cbr-DPY-23+protein,+related	FR823381:44152-49719	-0.50258	-1.41674	0.00297005	0.0158857	98.5666	78.4616	133.952	57.5795	30.9615	41.815
NCLIV_002490	NCLIV_002490	hypothetical+protein	FR823381:50684-54022	-0.241028	-1.18183	0.300394	0.532311	41.5039	33.0381	56.4037	29.0641	15.6283	21.1067
NCLIV_002500	NCLIV_002500	putative+intraflagellar+transport+particle+protein	FR823381:62370-68361	0.151899	1.11103	0.896486	0.995696	0.949818	0.756079	1.2908	0.886989	0.476949	0.644143
NCLIV_002510	NCLIV_002510	putative+ATP-dependent+RNA+helicase+DDX+family+protein	FR823381:70540-80624	-0.0741545	-1.05274	0.666768	0.855003	78.5701	62.5438	106.777	61.801	33.2315	44.8808
NCLIV_002520	NCLIV_002520	hypothetical+protein	FR823381:82592-85514	-0.145227	-1.1059	0.0988964	0.254003	1768.36	1407.66	2403.2	1324.2	712.045	961.652
NCLIV_002530	NCLIV_002530	upf0027+protein+PH1602,+related	FR823381:88928-93880	-0.23896	-1.18014	0.247158	0.466652	57.3169	45.6257	77.8936	40.2017	21.6171	29.195
NCLIV_002540	NCLIV_002540	putative+GTP-binding+protein	FR823381:95317-100111	0.223986	1.16796	0.380019	0.602599	31.0902	24.7486	42.2516	30.0933	16.1817	21.8542
NCLIV_002550	NCLIV_002550	hypothetical+protein	FR823381:104292-149007	0.745183	1.67619	1.54746e-07	2.54138e-06	132.482	105.459	180.043	183.987	98.9327	133.614
NCLIV_002560	NCLIV_002560	putative+T-cell+activation+protein+phosphatase+2C	FR823381:151051-153538	0.340072	1.26582	0.0457706	0.145076	75.2002	59.8613	102.197	78.8629	42.4059	57.2713
NCLIV_002570	NCLIV_002570	putative+tubulin+delta+chain	FR823381:155465-158466	3.02824	8.15811	0.047416	0.146929	0	0	0	0.883848	0.47526	0.641862
NCLIV_002580	NCLIV_002580	unspecified+product	FR823381:160867-162666	-0.201824	-1.15015	0.885682	0.991316	0.63458	0.505142	0.862394	0.441081	0.237177	0.320319
NCLIV_002590	NCLIV_002590	phthalate+dioxygenase+reductase+subunit,+related	FR823381:165005-172491	0.0408024	1.02869	0.752819	0.907081	171.963	136.887	233.698	146.499	78.7751	106.39
NCLIV_002600	NCLIV_002600	putative+peptide+chain+release+factor+1	FR823381:172656-178616	-0.304385	-1.23489	0.248414	0.46843	33.7279	26.8483	45.8362	22.5943	12.1493	16.4083
NCLIV_002610	NCLIV_002610	putative+isoleucine-tRNAsynthetase	FR823381:179303-191706	-0.0659361	-1.04676	0.649414	0.843434	139.853	111.326	190.06	110.639	59.4922	80.3472
NCLIV_002620	NCLIV_002620	kinesin-ii+motor+protein,+related	FR823381:200927-212275	0.695064	1.61896	0.421639	0.64619	1.58732	1.26355	2.15717	2.20509	1.18571	1.60137
NCLIV_002630	NCLIV_002630	protein+F46A9.4,+confirmed+by+transcript+evidence,+related	FR823381:212989-214994	-0.148721	-1.10859	0.40868	0.632836	75.5313	60.1248	102.647	56.4116	30.3335	40.9669
NCLIV_002640	NCLIV_002640	hypothetical+protein	FR823381:219678-221275	0.326739	1.25418	0.128131	0.304541	57.5018	45.7729	78.1449	59.7565	32.1321	43.396
NCLIV_002650	NCLIV_002650	unspecified+product	FR823381:222770-223999	0.162237	1.11902	0.802955	0.940756	3.79183	3.0184	5.1531	3.52839	1.89728	2.56237
NCLIV_002660	NCLIV_002660	hypothetical+protein	FR823381:228776-232662	-0.060938	-1.04314	0.743471	0.900452	72.5757	57.7721	98.6303	57.6113	30.9786	41.8381
NCLIV_002670	NCLIV_002670	hypothetical+protein	FR823381:235608-245158	-0.0186841	-1.01304	0.915557	1	83.0885	66.1406	112.917	67.922	36.5228	49.3258
NCLIV_002680	NCLIV_002680	agap001651-PA,+related	FR823381:259993-265088	-0.232141	-1.17458	0.0856416	0.228051	199.548	158.845	271.185	140.674	75.6429	102.159
NCLIV_002690	NCLIV_002690	chaperone+protein+DNAJ,+related	FR823381:266505-274431	-0.26993	-1.20575	0.056573	0.166854	174.099	138.587	236.601	119.554	64.2864	86.822
NCLIV_002700	NCLIV_002700	conserved+hypothetical+protein	FR823381:279788-284890	1.39988	2.63881	0.00285765	0.0154207	4.7502	3.78128	6.45552	10.5829	5.69062	7.68546
NCLIV_002710	NCLIV_002710	conserved+hypothetical+protein	FR823381:288329-291122	1.95406	3.87463	0.0106455	0.0463087	1.26916	1.01028	1.72478	4.42757	2.38078	3.21537
NCLIV_002720	NCLIV_002720	conserved+hypothetical+protein	FR823381:293673-297155	-2.39572	-5.2624	0.172355	0.36411	0.635251	0.505676	0.863306	0	0	0
NCLIV_002730	NCLIV_002730	conserved+hypothetical+protein	FR823381:299062-300033	3.42013	10.7044	0.000555702	0.0037496	0.316474	0.251922	0.430089	4.00106	2.15144	2.90562
NCLIV_002740	NCLIV_002740	related+to+CG16984+PROTEIN,+related	FR823381:300259-300827	3.54302	11.6562	2.8268e-07	4.42523e-06	0.952532	0.75824	1.29449	10.5097	5.65124	7.63229
NCLIV_002750	NCLIV_002750	conserved+hypothetical+protein	FR823381:304647-307205	0.344873	1.27004	0.00972328	0.0429993	145.438	115.773	197.65	153.001	82.2711	111.111
NCLIV_002760	NCLIV_002760	putative+CMGC+kinase,+MAPK+family	FR823381:312060-316979	0.0110205	1.00767	0.937763	1	151.094	120.275	205.336	126.089	67.8001	91.5674
NCLIV_002770	NCLIV_002770	putative+MORN+repeat-containing+protein	FR823381:321269-324357	0.460893	1.37639	5.69933e-05	0.000512596	324.039	257.944	440.369	369.401	198.633	268.264
NCLIV_002780	NCLIV_002780	yml024wp-like+protein,+related	FR823381:326177-327893	0.031192	1.02186	0.747862	0.903331	1171.13	932.252	1591.57	991.064	532.912	719.724
NCLIV_002790	NCLIV_002790	conserved+hypothetical+protein	FR823381:330809-370100	1.45591	2.74329	1.67593e-06	2.2434e-05	12.6288	10.0528	17.1625	28.9038	15.5421	20.9903
NCLIV_002800	NCLIV_002800	hypothetical+protein	FR823381:370417-392958	0.990084	1.9863	4.28278e-15	2.22604e-13	142.811	113.681	194.08	235.038	126.384	170.688
NCLIV_002810	NCLIV_002810	hypothetical+protein	FR823381:394028-397232	0.867628	1.82466	2.97808e-09	7.00459e-08	91.8272	73.0968	124.793	138.858	74.6663	100.841
NCLIV_002820	NCLIV_002820	hypothetical+protein	FR823381:399644-407508	0.130978	1.09504	0.371067	0.594218	146.427	116.559	198.994	132.799	71.4082	96.4403
NCLIV_002830	NCLIV_002830	calcium/proton+antiporter,+related	FR823381:409551-416746	0.019166	1.01337	0.905659	0.997799	87.0084	69.2609	118.244	73.0202	39.2642	53.0283
NCLIV_002840	NCLIV_002840	conserved+hypothetical+protein	FR823381:418534-423163	-0.634093	-1.55196	3.76041e-05	0.000352675	142.093	113.11	193.104	75.7788	40.7476	55.0316
NCLIV_002850	NCLIV_002850	hypothetical+protein	FR823381:426112-428282	-0.219381	-1.16423	0.0994831	0.25505	166.66	132.666	226.491	118.531	63.736	86.0787
NCLIV_002860	NCLIV_002860	hypothetical+protein	FR823381:431316-435346	-0.536295	-1.45024	0.0421013	0.136244	35.5701	28.3147	48.3397	20.2739	10.9016	14.7232
NCLIV_002870	NCLIV_002870	conserved+hypothetical+protein	FR823381:437691-438590	0.091357	1.06537	0.632641	0.831918	60.6777	48.301	82.461	53.5431	28.7911	38.8837
NCLIV_002880	NCLIV_002880	conserved+hypothetical+protein	FR823381:443576-450604	0.442238	1.35871	0.00929656	0.041475	72.1375	57.4233	98.0349	81.2147	43.6705	58.9792
NCLIV_002890	NCLIV_002890	hypothetical+protein	FR823381:454058-455476	0	1	1	1	0	0	0	0	0	0
NCLIV_002900	NCLIV_002900	conserved+hypothetical+protein	FR823381:463351-471711	0.0489253	1.03449	0.895139	0.994806	14.4205	11.4791	19.5975	12.3574	6.64478	8.97411
NCLIV_002905	NCLIV_002905	putative+ftsJ-like+methyltransferase+domain-containing+protein	FR823381:472386-473977	-0.450792	-1.36679	0.204092	0.407201	18.2823	14.5532	24.8456	11.0437	5.9384	8.0201
NCLIV_002910	NCLIV_002910	putative+ftsJ-like+methyltransferase+domain-containing+protein	FR823381:476181-483041	-0.215104	-1.16079	0.147944	0.338366	123.275	98.1304	167.531	87.931	47.282	63.8567
NCLIV_002920	NCLIV_002920	conserved+hypothetical+protein	FR823381:484877-487887	-0.622465	-1.5395	0.0286584	0.101029	32.0705	25.5289	43.5837	17.2086	9.25334	12.4971
NCLIV_002930	NCLIV_002930	unspecified+product	FR823381:493480-500769	-0.119003	-1.08598	0.867057	0.980701	3.4809	2.77089	4.73055	2.64474	1.42212	1.92065
NCLIV_002940	NCLIV_002940	putative+microneme+protein+MIC4	FR823381:504529-506316	0.763163	1.69721	1.95112e-19	1.6164e-17	6376.07	5075.52	8665.08	8961.83	4818.93	6508.2
NCLIV_002950	NCLIV_002950	hypothetical+protein	FR823381:508765-519798	-0.939816	-1.91828	4.115e-06	4.98886e-05	76.0593	60.5451	103.364	32.7761	17.6243	23.8025
NCLIV_002960	NCLIV_002960	putative+ABC+transporter	FR823381:521255-540368	-0.672656	-1.594	0.00470302	0.0233927	54.4969	43.381	74.0613	28.2662	15.1992	20.5273
NCLIV_002970	NCLIV_002970	hypothetical+protein	FR823381:543405-554635	0.15835	1.11601	0.423881	0.647539	62.4024	49.6739	84.8048	57.6897	31.0208	41.8951
NCLIV_002980	NCLIV_002980	putative+5-formyltetrahydrofolate+cyclo-ligase+domain-containing+protein	FR823381:559963-561076	-1.11719	-2.16924	0.00438724	0.0221321	19.8277	15.7834	26.9459	7.5035	4.03476	5.44914
NCLIV_002990	NCLIV_002990	putative+PHD-finger+domain-containing+protein	FR823381:563130-567433	-0.0826192	-1.05894	0.713767	0.880067	51.0553	40.6413	69.3841	39.9224	21.4669	28.9922
NCLIV_003000	NCLIV_003000	putative+pinA	FR823381:571020-573149	-0.113203	-1.08163	0.487894	0.70718	93.3226	74.2872	126.825	71.442	38.4156	51.8822
NCLIV_003010	NCLIV_003010	hypothetical+protein	FR823381:574456-577067	-0.553601	-1.46774	0.0353215	0.118695	37.9455	30.2056	51.568	21.3696	11.4908	15.5189
NCLIV_003020	NCLIV_003020	conserved+hypothetical+protein	FR823381:580189-586953	-0.146289	-1.10672	0.318691	0.550675	157.658	125.5	214.257	117.961	63.4296	85.6648
NCLIV_003030	NCLIV_003030	putative+RNA+recognition+motif-containing+protein	FR823381:590755-592534	0.0482727	1.03403	0.76581	0.915219	94.8227	75.4814	128.864	81.2032	43.6643	58.9708
NCLIV_003040	NCLIV_003040	conserved+hypothetical+protein	FR823381:596501-599344	-0.427685	-1.34507	0.0702826	0.197448	47.685	37.9585	64.8039	29.3268	15.7695	21.2975
NCLIV_003050	NCLIV_003050	putative+myosin+heavy+chain	FR823381:601812-606612	0.64221	1.56072	4.71167e-14	2.1291e-12	3499.17	2785.43	4755.37	4522.73	2431.95	3284.47
NCLIV_003060	NCLIV_003060	putative+capping+protein+alpha-like+subunit	FR823381:612820-616742	-0.273057	-1.20837	0.148032	0.338463	79.881	63.5873	108.558	54.726	29.4271	39.7428
NCLIV_003070	NCLIV_003070	conserved+hypothetical+protein	FR823381:619225-632669	0.444623	1.36096	3.4238e-05	0.000326861	509.359	405.463	692.219	574.127	308.718	416.939
NCLIV_003080	NCLIV_003080	transporter,+related	FR823381:636615-647330	-0.467089	-1.38232	0.0338233	0.114516	52.4427	41.7457	71.2696	31.3838	16.8756	22.7913
NCLIV_003090	NCLIV_003090	sodium-and+chloride-dependent+GABA+transporter+3,related	FR823381:653318-662323	0.165374	1.12146	0.180782	0.373797	201.456	160.364	273.778	187.112	100.613	135.884
NCLIV_003100	NCLIV_003100	unspecified+product	FR823381:663825-668194	0.303308	1.23397	0.00489297	0.0240805	349.023	277.831	474.322	356.696	191.802	259.038
NCLIV_003110	NCLIV_003110	conserved+hypothetical+protein	FR823381:669082-669717	-0.179473	-1.13247	0.126271	0.301976	288.038	229.286	391.444	210.619	113.254	152.955
NCLIV_003120	NCLIV_003120	unspecified+product	FR823381:671110-674123	0.719576	1.6467	5.04893e-15	2.57841e-13	728.415	579.837	989.916	993.419	534.179	721.435
NCLIV_003125	NCLIV_003125	GTP-binding+protein,+related	FR823381:679713-684965	-0.0636404	-1.0451	0.669552	0.855788	115.354	91.825	156.766	91.4016	49.1482	66.3771
NCLIV_003130	NCLIV_003130	GTP-binding+protein,+related	FR823381:687165-692553	0.103058	1.07405	0.473606	0.69304	132.302	105.315	179.798	117.688	63.2827	85.4664
NCLIV_003140	NCLIV_003140	conserved+hypothetical+protein	FR823381:694250-697303	0.989538	1.98555	0.0263894	0.094687	6.33909	5.04608	8.61482	10.5458	5.67063	7.65847
NCLIV_003150	NCLIV_003150	conserved+hypothetical+protein	FR823381:697882-700053	-0.194057	-1.14398	0.409332	0.633322	39.0744	31.1042	53.1021	28.2712	15.2019	20.5309
NCLIV_003160	NCLIV_003160	nicotinate+phosphoribosyltransferase,+related	FR823381:704445-713039	-0.0889959	-1.06363	0.595868	0.807634	86.4878	68.8465	117.537	67.3314	36.2052	48.897
NCLIV_003170	NCLIV_003170	putative+ATP-dependent+RNA+helicase	FR823381:716399-723899	-0.0879238	-1.06284	0.65538	0.846993	59.5215	47.3807	80.8897	46.371	24.9345	33.6752
NCLIV_003180	NCLIV_003180	conserved+hypothetical+protein	FR823381:726838-727782	0.853321	1.80666	1.68624e-15	9.1771e-14	355.214	282.759	482.735	531.558	285.828	386.025
NCLIV_003190	NCLIV_003190	putative+mitochondrial+carrier+domain-containing+protein	FR823381:729704-734438	-1.06729	-2.09549	9.47597e-10	2.45322e-08	110.807	88.2055	150.587	43.7266	23.5125	31.7549
NCLIV_003200	NCLIV_003200	ubiquitin-conjugating+enzyme,+related	FR823381:738820-742432	0.501318	1.41551	1.46619e-06	1.98762e-05	552.286	439.634	750.556	647.463	348.152	470.196
NCLIV_003210	NCLIV_003210	DNA+ligase+(Polydeoxyribonucleotide+synthase+[ATP])(Lig(Tk)),+related	FR823381:744788-752500	-0.656666	-1.57643	0.000153672	0.00122938	102.83	81.8552	139.746	53.9738	29.0226	39.1965
NCLIV_003220	NCLIV_003220	putative+vacuolar+ATP+synthase+subunit+h	FR823381:755027-761291	0.227766	1.17102	0.0696908	0.196303	198.402	157.933	269.628	192.426	103.471	139.742
NCLIV_003230	NCLIV_003230	putative+DNA/RNA+non-specific+endonuclease+domain-containing+protein	FR823381:762567-769173	-0.360217	-1.28362	0.336515	0.556747	16.5177	13.1485	22.4475	10.6291	5.71546	7.71901
NCLIV_003240	NCLIV_003240	putative+phosphatase	FR823381:771690-773399	0.189965	1.14074	0.115251	0.28379	304.378	242.292	413.649	287.561	154.626	208.83
NCLIV_003250	NCLIV_003250	putative+NcMCP4	FR823381:780921-784336	-0.592708	-1.50807	0.0185961	0.0722527	41.8206	33.2903	56.8342	22.9243	12.3268	16.648
NCLIV_003260	NCLIV_003260	putative+NcMCP3	FR823381:786398-788710	0.017246	1.01203	0.981214	1	3.17513	2.52748	4.31499	2.66223	1.43153	1.93335
NCLIV_003270	NCLIV_003270	putative+RWD+domain-containing+protein	FR823381:793347-796273	-0.0406511	-1.02858	0.836386	0.962341	65.6093	52.2267	89.163	52.8204	28.4024	38.3589
NCLIV_003280	NCLIV_003280	conserved+hypothetical+protein	FR823381:797531-799258	1.41014	2.65764	0.0468766	0.146929	1.9013	1.51348	2.58386	4.3899	2.36053	3.18801
NCLIV_003290	NCLIV_003290	conserved+hypothetical+protein	FR823381:802556-803357	0	1	1	1	0	0	0	0	0	0
NCLIV_003300	NCLIV_003300	ubiquitin+carrier+protein,+related	FR823381:805127-806617	0.00377108	1.00262	0.982324	1	88.8986	70.7656	120.813	73.8123	39.6901	53.6035
NCLIV_003310	NCLIV_003310	hypothetical+protein	FR823381:808492-811773	-0.906045	-1.8739	6.184e-07	9.11224e-06	97.4079	77.5392	132.377	42.9901	23.1165	31.22
NCLIV_003320	NCLIV_003320	fkbp-type+peptidyl-prolyl+cis-trans+isomerase,related	FR823381:814417-817542	-0.63244	-1.55018	0.00721762	0.0334252	51.9584	41.3602	70.6114	27.7125	14.9015	20.1252
NCLIV_003325	NCLIV_003325	fkbp-type+peptidyl-prolyl+cis-trans+isomerase,related	FR823381:819251-823225	-0.739747	-1.66988	0.220385	0.430377	6.3297	5.0386	8.60206	3.08953	1.66129	2.24366
NCLIV_003330	NCLIV_003330	hypothetical+protein	FR823381:823867-833583	-0.174763	-1.12878	0.328595	0.555356	79.9399	63.6342	108.638	58.6337	31.5283	42.5806
NCLIV_003340	NCLIV_003340	conserved+hypothetical+protein	FR823381:836875-838287	0.354307	1.27837	0.000194739	0.00150308	675.21	537.485	917.61	714.861	384.393	519.142
NCLIV_003350	NCLIV_003350	putative+ATP-dependent+DNA+helicase	FR823381:841122-853854	-0.0863653	-1.06169	0.440383	0.662668	469.047	373.373	637.434	365.859	196.729	265.692
NCLIV_003360	NCLIV_003360	srs+domain-containing+protein	FR823381:857334-857891	2.19522	4.57958	0.160461	0.34968	0	0	0	0.441952	0.237645	0.320951
NCLIV_003370	NCLIV_003370	conserved+hypothetical+protein	FR823381:865177-872885	0.121163	1.08761	0.522331	0.741886	70.8679	56.4127	96.3094	63.8401	34.3279	46.3615
NCLIV_003380	NCLIV_003380	conserved+hypothetical+protein	FR823381:875062-878163	-0.263432	-1.20033	0.153216	0.347419	76.2703	60.7131	103.651	52.6008	28.2843	38.1994
NCLIV_003390	NCLIV_003390	conserved+hypothetical+protein	FR823381:883106-883870	-0.564407	-1.47878	0.285098	0.514987	7.92862	6.31139	10.775	4.40068	2.36632	3.19583
NCLIV_003400	NCLIV_003400	conserved+hypothetical+protein	FR823381:887200-888474	-0.0768666	-1.05472	0.750409	0.905641	35.9559	28.6218	48.864	28.2249	15.177	20.4973
NCLIV_003410	NCLIV_003410	putative+HECT-domain+(ubiquitin-transferase)+containing+protein	FR823381:890642-929974	0.510885	1.42492	0.000263375	0.00194428	154.079	122.651	209.394	181.874	97.7969	132.08
NCLIV_003420	NCLIV_003420	putative+elongation+factor+ts	FR823381:934363-936405	-0.227156	-1.17053	0.200201	0.401803	84.5939	67.3389	114.963	59.8329	32.1732	43.4514
NCLIV_003430	NCLIV_003430	conserved+hypothetical+protein	FR823381:937853-944848	0.861798	1.8173	9.31161e-06	0.000103933	41.9024	33.3554	56.9453	63.1636	33.9641	45.8702
NCLIV_003440	NCLIV_003440	actin,+related	FR823381:949756-951293	0.172779	1.12723	0.0334452	0.113555	3511.21	2795.01	4771.73	3277.74	1762.5	2380.34
NCLIV_003450	NCLIV_003450	putative+ankyrin+repeat-containing+protein	FR823381:952936-956902	-0.41198	-1.33051	0.0853857	0.227503	45.9676	36.5914	62.47	28.58	15.368	20.7552
NCLIV_003460	NCLIV_003460	hypothetical+protein	FR823381:963033-966446	-0.633572	-1.5514	0.00461345	0.023024	52.2765	41.6134	71.0437	27.8612	14.9815	20.2332
NCLIV_003470	NCLIV_003470	putative+thrombospondin+type+1+domain-containing+protein	FR823381:971864-978049	-1.388	-2.61715	1.01051e-08	2.17756e-07	60.0877	47.8313	81.6591	18.9376	10.1831	13.7527
NCLIV_003480	NCLIV_003480	conserved+hypothetical+protein	FR823381:980221-981672	0.271296	1.20689	0.040024	0.130988	142.551	113.474	193.727	142.502	76.6258	103.487
NCLIV_003490	NCLIV_003490	putative+transport+protein+particle+component+Bet3+domain-containing+protein	FR823381:982273-983043	-0.108303	-1.07796	0.608695	0.813048	48.8491	38.8851	66.3859	37.5195	20.1749	27.2472
NCLIV_003500	NCLIV_003500	conserved+hypothetical+protein	FR823381:984702-985202	-0.363484	-1.28653	0.0139182	0.0575883	130.204	103.646	176.947	83.7845	45.0524	60.8455
NCLIV_003510	NCLIV_003510	conserved+hypothetical+protein	FR823381:988344-994621	0.0214026	1.01495	0.875558	0.985383	146.943	116.97	199.695	123.51	66.4135	89.6947
NCLIV_003520	NCLIV_003520	putative+mRNA+decapping+enzyme	FR823381:998338-1001459	0.0560613	1.03962	0.779654	0.923887	53.2201	42.3646	72.3261	45.8252	24.641	33.2789
NCLIV_003530	NCLIV_003530	conserved+hypothetical+protein	FR823381:1003376-1004377	-0.43164	-1.34877	0.0745991	0.20631	41.2681	32.8505	56.0833	25.3062	13.6076	18.3777
NCLIV_003540	NCLIV_003540	hect+E3+ubiquitin+ligase,+related	FR823381:1006346-1016064	0.735035	1.66444	0.000247371	0.00184624	47.2905	37.6445	64.2678	65.2678	35.0956	47.3983
NCLIV_003550	NCLIV_003550	hypothetical+protein	FR823381:1023129-1023677	-1.49929	-2.82703	2.55347e-06	3.24892e-05	34.9246	27.8009	47.4626	10.1508	5.45824	7.37162
NCLIV_003560	NCLIV_003560	putative+mitochondrial+alternative+NADH+dehydrogenase+1	FR823381:1025967-1028652	-0.678989	-1.60102	0.00336012	0.0176928	53.0362	42.2182	72.0762	27.3876	14.7268	19.8892
NCLIV_003570	NCLIV_003570	hypothetical+protein	FR823381:1030247-1036478	-0.323825	-1.25164	0.0835728	0.22363	72.3292	57.5759	98.2953	47.8307	25.7194	34.7353
NCLIV_003580	NCLIV_003580	conserved+hypothetical+protein	FR823381:1040346-1041218	0.481678	1.39637	8.18586e-05	0.000710521	189.826	151.107	257.974	219.562	118.062	159.449
NCLIV_003590	NCLIV_003590	putative+PAN+domain-containing+protein	FR823381:1047538-1048830	0.161681	1.11859	0.690072	0.870588	10.4566	8.32372	14.2105	9.70128	5.21655	7.0452
NCLIV_003600	NCLIV_003600	putative+ABC+transporter	FR823381:1050865-1055585	0.220058	1.16478	0.238322	0.454691	62.0312	49.3785	84.3004	59.8553	32.1852	43.4677
NCLIV_003610	NCLIV_003610	conserved+hypothetical+protein	FR823381:1058579-1067308	-0.0178659	-1.01246	0.899651	0.995995	137.01	109.064	186.197	112.067	60.2602	81.3844
NCLIV_003620	NCLIV_003620	putative+KH+domain-containing+protein	FR823381:1070453-1079369	-0.0224938	-1.01571	0.866265	0.980251	219.02	174.345	297.647	178.572	96.0213	129.682
NCLIV_003630	NCLIV_003630	conserved+hypothetical+protein	FR823381:1082034-1085585	0.832604	1.7809	0.000107431	0.000905916	36.4726	29.0332	49.5663	53.8884	28.9767	39.1345
NCLIV_003640	NCLIV_003640	conserved+hypothetical+protein	FR823381:1090612-1096293	-0.109517	-1.07887	0.299338	0.531143	595.366	473.927	809.102	456.996	245.735	331.877
NCLIV_003650	NCLIV_003650	hypothetical+protein	FR823381:1099540-1101891	-0.118325	-1.08547	0.281519	0.511081	383.379	305.18	521.012	292.482	157.273	212.405
NCLIV_003660	NCLIV_003660	conserved+hypothetical+protein	FR823381:1105820-1115784	0.273071	1.20838	0.109715	0.27425	72.6452	57.8274	98.7248	72.7216	39.1036	52.8114
NCLIV_003670	NCLIV_003670	conserved+hypothetical+protein	FR823381:1124063-1131797	-0.0286424	-1.02005	0.855387	0.97311	96.7896	77.047	131.537	78.5773	42.2523	57.0639
NCLIV_003680	NCLIV_003680	40s+ribosomal+protein+S28,+related	FR823381:1136044-1136250	0.157595	1.11543	0.135811	0.318089	582.763	463.895	791.975	538.33	289.469	390.943
NCLIV_003690	NCLIV_003690	putative+dynein+intermediate+chain	FR823381:1140759-1149132	-0.221243	-1.16574	0.84133	0.96459	1.26725	1.00876	1.72219	0.882746	0.474667	0.641062
NCLIV_003700	NCLIV_003700	conserved+hypothetical+protein	FR823381:1151077-1152712	-0.0216335	-1.01511	0.864359	0.979581	250.812	199.653	340.853	204.613	110.024	148.593
NCLIV_003710	NCLIV_003710	putative+U3+small+nucleolar+ribonucleoprotein+protein+IMP3	FR823381:1153828-1156063	-0.155443	-1.11376	0.450311	0.671187	67.3949	53.648	91.5896	50.0987	26.9389	36.3824
NCLIV_003720	NCLIV_003720	conserved+hypothetical+protein	FR823381:1160019-1166004	0.614976	1.53153	0.000793484	0.00510458	53.3866	42.4971	72.5523	67.7771	36.4449	49.2206
NCLIV_003730	NCLIV_003730	hypothetical+protein	FR823381:1166084-1166929	-0.306417	-1.23663	0.40174	0.627304	15.859	12.6242	21.5524	10.5969	5.69811	7.69559
NCLIV_003740	NCLIV_003740	hypothetical+protein	FR823381:1167114-1171241	0.174759	1.12878	0.279827	0.509249	92.6577	73.7579	125.922	86.632	46.5835	62.9133
NCLIV_003750	NCLIV_003750	putative+TLD+domain-containing+protein	FR823381:1174588-1180848	0.306523	1.23672	0.0287958	0.10137	120.514	95.9326	163.779	123.458	66.3856	89.657
NCLIV_003760	NCLIV_003760	conserved+hypothetical+protein	FR823381:1185998-1189203	-0.377883	-1.29943	0.0248646	0.0903201	95.0147	75.6341	129.125	60.5252	32.5455	43.9543
NCLIV_003770	NCLIV_003770	protein+with+signal+peptide+plus+Thr+stretch,possible+mucin,+related	FR823381:1190567-1193647	-1.64226	-3.12154	0.334808	0.555356	0.316536	0.25197	0.430172	0	0	0
NCLIV_003780	NCLIV_003780	conserved+hypothetical+protein	FR823381:1195809-1197173	0	1	1	1	0	0	0	0	0	0
NCLIV_003790	NCLIV_003790	conserved+hypothetical+protein	FR823381:1202393-1206144	0.465457	1.38075	0.0983264	0.253062	21.4424	17.0687	29.1402	24.5655	13.2093	17.8398
NCLIV_003800	NCLIV_003800	conserved+hypothetical+protein	FR823381:1211972-1221987	0.395339	1.31525	0.00160671	0.00934467	201.014	160.012	273.178	218.987	117.753	159.032
NCLIV_003810	NCLIV_003810	conserved+hypothetical+protein	FR823381:1224859-1227642	1.38598	2.61349	0.304262	0.536434	0.316536	0.25197	0.430172	0.883848	0.47526	0.641862
NCLIV_003820	NCLIV_003820	conserved+hypothetical+protein	FR823381:1235642-1246376	-0.116592	-1.08417	0.507626	0.726134	78.2648	62.3008	106.362	59.7723	32.1406	43.4074
NCLIV_003830	NCLIV_003830	conserved+hypothetical+protein	FR823381:1249312-1250424	-0.308027	-1.23801	0.298516	0.530442	25.9172	20.6308	35.2215	17.3122	9.30908	12.5724
NCLIV_003840	NCLIV_003840	conserved+hypothetical+protein	FR823381:1253202-1258329	0.460122	1.37566	0.113939	0.281282	18.9947	15.1203	25.8138	21.6855	11.6607	15.7483
NCLIV_003850	NCLIV_003850	hypothetical+protein	FR823381:1261440-1267282	-0.188458	-1.13955	0.520594	0.740366	23.7389	18.8968	32.2611	17.2364	9.26833	12.5173
NCLIV_003860	NCLIV_003860	conserved+hypothetical+protein	FR823381:1270501-1272027	-1.58197	-2.99379	0.0844201	0.225443	3.49388	2.78121	4.74817	0.884213	0.475457	0.642128
NCLIV_003870	NCLIV_003870	hypothetical+protein	FR823381:1278690-1281289	-0.138923	-1.10108	0.364916	0.587938	106.439	84.7278	144.65	80.0431	43.0406	58.1284
NCLIV_003875	NCLIV_003875	unspecified+product	FR823381:1286050-1290434	-0.383744	-1.30472	0.281222	0.510665	17.3647	13.8227	23.5986	10.9932	5.91121	7.98338
NCLIV_003880	NCLIV_003880	conserved+hypothetical+protein	FR823381:1293930-1294803	1.76134	3.39012	0.00917097	0.0409699	1.90825	1.51902	2.59331	5.65557	3.04109	4.10715
NCLIV_003890	NCLIV_003890	conserved+hypothetical+protein	FR823381:1295737-1297467	0.500501	1.4147	8.24035e-07	1.17476e-05	605.92	482.328	823.446	709.933	381.743	515.563
NCLIV_003900	NCLIV_003900	putative+oocyst+wall+protein+COWP	FR823381:1299256-1300758	1.1229	2.17784	2.04631e-05	0.000208433	19.3023	15.3651	26.2318	34.9577	18.7974	25.3868
NCLIV_003910	NCLIV_003910	cathepsin+D+enzyme,+related	FR823381:1302186-1303929	0	1	1	1	0	0	0	0	0	0
NCLIV_003920	NCLIV_003920	conserved+hypothetical+protein	FR823381:1305227-1308286	0.269783	1.20563	0.316277	0.548155	24.3386	19.3742	33.0762	24.3253	13.0801	17.6654
NCLIV_003930	NCLIV_003930	conserved+hypothetical+protein	FR823381:1309958-1311178	0.295948	1.22769	0.260233	0.484348	26.994	21.4879	36.6848	27.4729	14.7726	19.9512
NCLIV_003940	NCLIV_003940	conserved+hypothetical+protein	FR823381:1313434-1329292	0.145181	1.10587	0.472695	0.692078	54.3187	43.2391	73.8191	49.7585	26.756	36.1353
NCLIV_003950	NCLIV_003950	conserved+hypothetical+protein	FR823381:1331551-1337377	0.208546	1.15552	0.322919	0.555265	45.1259	35.9214	61.326	43.2023	23.2306	31.3741
NCLIV_003960	NCLIV_003960	hypothetical+protein	FR823381:1339644-1340917	-0.296282	-1.22798	0.0788753	0.214242	88.4762	70.4294	120.239	59.6451	32.0722	43.3151
NCLIV_003970	NCLIV_003970	conserved+hypothetical+protein	FR823381:1342724-1343498	-0.292921	-1.22512	0.104361	0.264755	76.4026	60.8184	103.831	51.6232	27.7587	37.4894
NCLIV_003980	NCLIV_003980	50s+ribosomal+protein+L28,+related	FR823381:1346517-1347775	-0.332101	-1.25885	0.0401574	0.131149	104.34	83.057	141.797	68.6153	36.8956	49.8294
NCLIV_003990	NCLIV_003990	conserved+hypothetical+protein	FR823381:1348052-1349964	0.207333	1.15455	0.119578	0.290827	166.101	132.22	225.731	158.832	85.4069	115.346
NCLIV_004000	NCLIV_004000	conserved+hypothetical+protein	FR823381:1351904-1359664	-0.875398	-1.83451	1.30538e-05	0.000138449	78.4427	62.4424	106.604	35.3545	19.0107	25.6749
NCLIV_004010	NCLIV_004010	conserved+hypothetical+protein	FR823381:1361875-1362483	-0.109912	-1.07916	0.730233	0.890308	19.6115	15.6112	26.652	15.0403	8.0874	10.9224
NCLIV_004020	NCLIV_004020	tryptophan-rich+antigen+(Pv-fam-a),+related	FR823381:1365840-1367807	1.62848	3.09187	0.00153946	0.00900956	3.80948	3.03245	5.17709	10.0146	5.38502	7.27274
NCLIV_004030	NCLIV_004030	hypothetical+protein	FR823381:1369786-1383395	0.0857517	1.06124	0.685016	0.866893	46.6791	37.1578	63.4369	41.0322	22.0637	29.7981
NCLIV_004040	NCLIV_004040	radical+SAM+enzyme,+Cfr+family,+related	FR823381:1386040-1390275	0.247013	1.18675	0.265314	0.491348	40.1114	31.9297	54.5114	39.4448	21.2101	28.6453
NCLIV_004050	NCLIV_004050	formate/nitrite+transporter+family+protein,related	FR823381:1393693-1394958	-0.00373644	-1.00259	0.978111	1	141.807	112.882	192.716	117.132	62.9838	85.0628
NCLIV_004060	NCLIV_004060	conserved+hypothetical+protein	FR823381:1396790-1397803	-0.268035	-1.20417	0.049503	0.151517	196.054	156.064	266.437	134.811	72.49	97.9013
NCLIV_004070	NCLIV_004070	hypothetical+protein	FR823381:1399320-1403145	-0.27032	-1.20608	0.305235	0.536499	32.3849	25.7792	44.0111	22.2152	11.9455	16.133
NCLIV_004080	NCLIV_004080	putative+myosin+heavy+chain	FR823381:1407993-1416068	-0.26935	-1.20526	0.362405	0.584738	24.4775	19.4847	33.2649	16.7977	9.03242	12.1987
NCLIV_004090	NCLIV_004090	hypothetical+protein	FR823381:1420331-1423011	0.0204664	1.01429	0.92284	1	52.7307	41.975	71.661	44.2931	23.8171	32.1662
NCLIV_004100	NCLIV_004100	putative+nucleolar+phosphoprotein+p130	FR823381:1428445-1430572	-0.41554	-1.3338	0.181692	0.37495	22.8334	18.176	31.0306	14.1461	7.60659	10.2731
NCLIV_004110	NCLIV_004110	hypothetical+protein	FR823381:1431857-1434878	-0.172235	-1.1268	0.528994	0.745874	29.9146	23.8128	40.6539	21.9727	11.8151	15.9569
NCLIV_004120	NCLIV_004120	putative+glutamic+acid-rcih+protein	FR823381:1438786-1454378	0.241937	1.18258	0.190374	0.388885	73.9115	58.8354	100.446	72.4087	38.9354	52.5842
NCLIV_004130	NCLIV_004130	hypothetical+protein	FR823381:1456924-1460752	-0.425544	-1.34308	0.106286	0.268452	35.7173	28.4319	48.5398	21.992	11.8255	15.9709
NCLIV_004140	NCLIV_004140	hypothetical+protein	FR823381:1464085-1465701	-0.0760696	-1.05414	0.52361	0.742009	293.933	233.978	399.455	230.91	124.164	167.69
NCLIV_004150	NCLIV_004150	conserved+hypothetical+protein	FR823381:1471004-1473457	-0.410396	-1.32905	0.165225	0.356763	27.1958	21.6486	36.9591	16.9143	9.09513	12.2834
NCLIV_004160	NCLIV_004160	histone+H2B,+related	FR823381:1476686-1477057	0.0907395	1.06492	0.324869	0.555356	1391.21	1107.44	1890.66	1226.92	659.737	891.007
NCLIV_004170	NCLIV_004170	unspecified+product	FR823381:1479174-1481615	0.55296	1.46709	0.714173	0.880067	0.316536	0.25197	0.430172	0.441952	0.237645	0.320951
NCLIV_004180	NCLIV_004180	conserved+hypothetical+protein	FR823381:1487181-1492353	-0.0995882	-1.07147	0.742568	0.899819	26.7729	21.3119	36.3843	20.6844	11.1223	15.0213
NCLIV_004190	NCLIV_004190	putative+thioredoxin	FR823381:1498857-1501854	-0.00311642	-1.00216	0.978073	1	421.003	335.129	572.143	347.897	187.07	252.648
NCLIV_004200	NCLIV_004200	hypothetical+protein	FR823381:1507477-1519904	0.0661663	1.04693	0.669617	0.855788	99.2706	79.0219	134.909	86.0747	46.2838	62.5086
NCLIV_004210	NCLIV_004210	putative+gamma-tubulin+complex+component+4	FR823381:1523662-1537962	0.144193	1.10511	0.317553	0.54956	128.117	101.984	174.111	117.264	63.0549	85.1588
NCLIV_004220	NCLIV_004220	unspecified+product	FR823381:1539091-1540830	1.92995	3.81041	3.55413e-06	4.37286e-05	5.08018	4.04395	6.90396	16.3784	8.80695	11.8942
NCLIV_004230	NCLIV_004230	hypothetical+protein	FR823381:1544074-1545478	3.02628	8.14705	0.0475115	0.146929	0	0	0	0.882648	0.474615	0.640991
NCLIV_004240	NCLIV_004240	conserved+hypothetical+protein	FR823381:1548203-1555485	0.415322	1.3336	0.00427428	0.0216944	101.416	80.7298	137.824	112.046	60.2489	81.3692
NCLIV_004250	NCLIV_004250	putative+nuclear+RNA+binding+protein	FR823381:1558618-1561658	-0.138648	-1.10087	0.167584	0.360195	767.152	610.673	1042.56	577.086	310.309	419.087
NCLIV_004260	NCLIV_004260	hypothetical+protein	FR823381:1563847-1566590	-1.97434	-3.92949	2.16658e-10	6.18928e-09	42.2975	33.6699	57.4823	8.82222	4.74386	6.40682
NCLIV_004270	NCLIV_004270	putative+protein+kinase	FR823381:1569506-1577688	0.150139	1.10968	0.198497	0.399674	252.528	201.018	343.185	232.078	124.793	168.538
NCLIV_004280	NCLIV_004280	hypothetical+protein	FR823381:1583632-1591950	-0.309996	-1.2397	0.101546	0.258857	73.3491	58.3878	99.6814	48.9735	26.3339	35.5652
NCLIV_004290	NCLIV_004290	hypothetical+protein	FR823381:1600754-1604070	0.02246	1.01569	0.911993	1	52.5142	41.8026	71.3667	44.1738	23.753	32.0796
NCLIV_004300	NCLIV_004300	putative+dynamin-like+protein	FR823381:1606995-1615776	0.0980162	1.0703	0.286616	0.515937	1010.96	804.75	1373.89	896.083	481.839	650.748
NCLIV_004310	NCLIV_004310	hypothetical+protein	FR823381:1620764-1626657	-0.233163	-1.17541	0.352648	0.574468	33.8639	26.9565	46.021	23.8405	12.8194	17.3133
NCLIV_004320	NCLIV_004320	conserved+hypothetical+protein	FR823381:1628188-1634333	-0.172389	-1.12692	0.334324	0.555356	80.9614	64.4474	110.027	59.4833	31.9852	43.1976
NCLIV_004330	NCLIV_004330	conserved+hypothetical+protein	FR823381:1636612-1639073	-0.127437	-1.09235	0.374107	0.597235	127.05	101.135	172.66	96.3092	51.7871	69.941
NCLIV_004340	NCLIV_004340	hypothetical+protein	FR823381:1640611-1641401	-2.14465	-4.42184	6.56538e-19	5.09911e-17	83.1035	66.1525	112.938	15.4684	8.31761	11.2333
NCLIV_004350	NCLIV_004350	calcium+homeostasis+endoplasmic+reticulum+protein,+related	FR823381:1642307-1651890	-0.010126	-1.00704	0.947842	1	106.825	85.0355	145.175	87.8472	47.2369	63.7958
NCLIV_004360	NCLIV_004360	conserved+hypothetical+protein	FR823381:1653458-1654342	-0.456059	-1.37179	0.0578047	0.169482	42.306	33.6766	57.4938	25.5071	13.7156	18.5236
NCLIV_004370	NCLIV_004370	conserved+hypothetical+protein	FR823381:1656330-1665348	-0.214798	-1.16054	0.139505	0.324439	152.875	121.693	207.757	109.072	58.65	79.2097
NCLIV_004380	NCLIV_004380	cathepsin+L,+related	FR823381:1666633-1669425	0.398256	1.31791	0.000173823	0.00135994	452.647	360.318	615.147	494.067	265.668	358.798
NCLIV_004390	NCLIV_004390	p23,+related	FR823381:1670839-1672961	-0.282707	-1.21648	0.00692498	0.0324326	702.909	559.533	955.253	478.498	257.296	347.492
NCLIV_004400	NCLIV_004400	hypothetical+protein	FR823381:1677554-1680178	-0.341671	-1.26722	0.00102881	0.0063764	557.867	444.076	758.141	364.544	196.022	264.737
NCLIV_004401	NCLIV_004401	srs+domain-containing+protein	FR823381:1684234-1685394	0	1	1	1	0	0	0	0	0	0
NCLIV_004410	NCLIV_004410	srs+domain-containing+protein	FR823381:1687132-1688286	-1.64493	-3.12732	0.334449	0.555356	0.317124	0.252439	0.430971	0	0	0
NCLIV_004411	NCLIV_004411	srs+domain-containing+protein	FR823381:1690873-1692033	-1.64226	-3.12154	0.334808	0.555356	0.316536	0.25197	0.430172	0	0	0
NCLIV_004420	NCLIV_004420	srs+domain-containing+protein	FR823381:1693963-1695114	-1.64493	-3.12732	0.334449	0.555356	0.317124	0.252439	0.430971	0	0	0
NCLIV_004421	NCLIV_004421	srs+domain-containing+protein	FR823381:1696860-1698017	0	1	1	1	0	0	0	0	0	0
NCLIV_004430	NCLIV_004430	srs+domain-containing+protein	FR823381:1699768-1700928	0	1	1	1	0	0	0	0	0	0
NCLIV_004431	NCLIV_004431	srs+domain-containing+protein	FR823381:1702369-1703529	0	1	1	1	0	0	0	0	0	0
NCLIV_004432	NCLIV_004432	srs+domain-containing+protein	FR823381:1712578-1713735	-5.21431	-37.1247	8.05218e-05	0.000699733	5.38656	4.28784	7.32034	0	0	0
NCLIV_004440	NCLIV_004440	srs+domain-containing+protein	FR823381:1716886-1718040	1.15751	2.23073	0.308281	0.538931	0.634611	0.505167	0.862436	1.32467	0.712297	0.961993
NCLIV_004441	NCLIV_004441	srs+domain-containing+protein	FR823381:1719544-1720692	-1.64493	-3.12732	0.334449	0.555356	0.317124	0.252439	0.430971	0	0	0
NCLIV_004450	NCLIV_004450	srs+domain-containing+protein	FR823381:1722554-1723711	2.19718	4.58583	0.16028	0.34968	0	0	0	0.442555	0.23797	0.32139
NCLIV_004460	NCLIV_004460	srs+domain-containing+protein	FR823381:1726792-1727961	0	1	1	1	0	0	0	0	0	0
NCLIV_004470	NCLIV_004470	SAG1-related+sequence+2,+related	FR823381:1731030-1732199	0	1	1	1	0	0	0	0	0	0
NCLIV_004471	NCLIV_004471	srs+domain-containing+protein	FR823381:1734830-1735918	2.13812	4.40187	1.81222e-18	1.35119e-16	17.6641	14.0611	24.0055	64.8096	34.8493	47.0656
NCLIV_004480	NCLIV_004480	putative+myb-like+DNA-binding+domain-containing+protein	FR823381:1737271-1751750	0.0550751	1.03891	0.694838	0.873902	205.311	163.433	279.018	176.65	94.9875	128.285
NCLIV_004490	NCLIV_004490	hypothetical+protein	FR823381:1756781-1765587	0.272546	1.20794	0.0107951	0.0467138	383.727	305.456	521.485	383.885	206.421	278.782
NCLIV_004500	NCLIV_004500	putative+DNA+repair+protein+recA	FR823381:1767840-1769399	-0.322137	-1.25018	0.380014	0.602599	16.6461	13.2507	22.622	11.0031	5.91657	7.99062
NCLIV_004510	NCLIV_004510	putative+kelch+motif+domain-containing+protein	FR823381:1771575-1773152	0.185877	1.13751	0.207664	0.413003	111.322	88.6152	151.287	104.885	56.3986	76.1691
NCLIV_004520	NCLIV_004520	conserved+hypothetical+protein	FR823381:1775176-1786745	-0.0577048	-1.04081	0.640176	0.8364	239.814	190.899	325.908	190.809	102.601	138.568
NCLIV_004530	NCLIV_004530	putative+microsomal+signal+peptidase+subunit+SPCS1+domain-containing+protein	FR823381:1788962-1789360	0.0875915	1.06259	0.583038	0.795741	97.448	77.5711	132.432	85.7599	46.1145	62.28
NCLIV_004540	NCLIV_004540	conserved+hypothetical+protein	FR823381:1790145-1791275	0.947745	1.92885	0.25281	0.474202	1.58726	1.2635	2.15709	2.65049	1.42521	1.92482
NCLIV_004550	NCLIV_004550	conserved+hypothetical+protein	FR823381:1793921-1802595	-0.29426	-1.22626	0.190624	0.389182	46.4774	36.9972	63.1628	31.3651	16.8656	22.7778
NCLIV_004560	NCLIV_004560	putative+RNA+recognition+motif+domain-containing+protein	FR823381:1805135-1809437	0.452008	1.36794	0.0499348	0.152588	36.4878	29.0452	49.5869	41.3802	22.2508	30.0508
NCLIV_004570	NCLIV_004570	hypothetical+protein	FR823381:1812984-1813439	0.486992	1.40152	1.43095e-07	2.37092e-06	1036.73	825.261	1408.91	1203.33	647.053	873.877
NCLIV_004580	NCLIV_004580	hypothetical+protein	FR823381:1815591-1830526	1.09572	2.1372	6.99733e-16	3.95243e-14	114.301	90.9865	155.335	202.444	108.858	147.017
NCLIV_004590	NCLIV_004590	putative+zinc+finger+(C2H2+type)+protein	FR823381:1832590-1836628	0.236896	1.17845	0.291169	0.521743	41.4477	32.9934	56.3274	40.4703	21.7616	29.3901
NCLIV_004600	NCLIV_004600	hypothetical+protein	FR823381:1839206-1843169	0.0173219	1.01208	0.912898	1	110.286	87.7906	149.879	92.4376	49.7053	67.1295
NCLIV_004610	NCLIV_004610	hypothetical+protein	FR823381:1845172-1849446	0.369491	1.2919	0.0325371	0.111023	69.9222	55.6598	95.0242	74.8451	40.2455	54.3535
NCLIV_004620	NCLIV_004620	hypothetical+protein	FR823381:1855947-1856210	-1.79435	-3.46858	0.118468	0.289037	2.21918	1.76652	3.01586	0.441909	0.237622	0.32092
NCLIV_004630	NCLIV_004630	putative+threonine+synthase	FR823382:47138-52537	2.52895	5.7715	5.7077e-33	8.51133e-31	21.409	17.0421	29.0948	102.912	55.3378	74.7364
NCLIV_004640	NCLIV_004640	putative+DEAD/DEAH+box+helicase	FR823382:58406-62251	0.116095	1.0838	0.437815	0.660398	120.858	96.2059	164.246	108.485	58.3341	78.7831
NCLIV_004650	NCLIV_004650	conserved+hypothetical+protein	FR823382:64385-66615	0.610576	1.52687	0.00597806	0.0284108	35.3417	28.1329	48.0293	44.7546	24.0653	32.5014
NCLIV_004660	NCLIV_004660	conserved+hypothetical+protein	FR823382:69266-71427	-0.110464	-1.07958	0.576212	0.788589	69.2216	55.1022	94.0722	53.0904	28.5476	38.555
NCLIV_004670	NCLIV_004670	conserved+hypothetical+protein	FR823382:72298-74774	0.42478	1.34237	5.08817e-05	0.000463696	604.374	481.097	821.344	671.908	361.296	487.949
NCLIV_004680	NCLIV_004680	conserved+hypothetical+protein	FR823382:76691-78802	-0.00283484	-1.00197	0.976397	1	848.526	675.449	1153.15	701.32	377.112	509.308
NCLIV_004690	NCLIV_004690	heat+repeat+family+protein,+related	FR823382:81055-93323	0.251643	1.19056	0.0549121	0.162961	165.913	132.071	225.476	163.606	87.9739	118.813
NCLIV_004700	NCLIV_004700	conserved+hypothetical+protein	FR823382:95878-101142	-0.351028	-1.27547	0.188272	0.385514	33.4715	26.6442	45.4878	21.706	11.6717	15.7632
NCLIV_004710	NCLIV_004710	hypothetical+protein	FR823382:102615-108181	-0.965435	-1.95265	2.50202e-08	4.93521e-07	119.196	94.8835	161.988	50.4918	27.1503	36.6678
NCLIV_004720	NCLIV_004720	putative+ribosomal+RNA+large+subunit+methyltransferase+J	FR823382:119896-123636	-0.274429	-1.20951	0.222715	0.433565	51.5697	41.0508	70.0833	35.2866	18.9742	25.6256
NCLIV_004730	NCLIV_004730	hypothetical+protein	FR823382:126140-127354	0.413476	1.33189	3.31707e-05	0.000317893	655.959	522.16	891.447	723.559	389.07	525.459
NCLIV_004740	NCLIV_004740	putative+acetyltransferase+domain-containing+protein	FR823382:129337-131021	0.309594	1.23936	0.0225536	0.084038	134.069	106.722	182.199	137.632	74.0072	99.9504
NCLIV_004750	NCLIV_004750	putative+peptidase+family+M48+domain-containing+protein	FR823382:133186-136835	-0.112081	-1.08079	0.359483	0.581664	222.391	177.029	302.229	170.395	91.6245	123.743
NCLIV_004760	NCLIV_004760	putative+transmembrane+domain-containing+protein	FR823382:138970-144846	0.520674	1.43463	9.31639e-07	1.30815e-05	512.593	408.037	696.614	609.053	327.498	442.302
NCLIV_004770	NCLIV_004770	hypothetical+protein	FR823382:145481-147145	0.136985	1.0996	0.520448	0.740366	50.4006	40.1202	68.4944	45.9091	24.6861	33.3398
NCLIV_004780	NCLIV_004780	cw-type+zinc+finger+domain-containing+protein,related	FR823382:149004-160001	0.22114	1.16565	0.067171	0.191228	243.715	194.003	331.208	235.285	126.517	170.867
NCLIV_004790	NCLIV_004790	putative+18+kDa+cyclophilin	FR823382:164464-166110	0.113763	1.08205	0.223604	0.434731	969.11	771.436	1317.02	868.418	466.963	630.657
NCLIV_004800	NCLIV_004800	conserved+hypothetical+protein	FR823382:168214-180281	-1.7917	-3.46223	0.11998	0.291486	2.21058	1.75968	3.00418	0.441009	0.237138	0.320267
NCLIV_004810	NCLIV_004810	conserved+hypothetical+protein	FR823382:186954-191606	-0.0260245	-1.0182	0.875738	0.985436	116.623	92.835	158.491	94.8511	51.003	68.8821
NCLIV_004820	NCLIV_004820	phospho-2-dehydro-3-deoxyheptonate+aldolase,related	FR823382:197997-203183	-1.31192	-2.48271	6.44314e-12	2.27678e-10	101.381	80.7022	137.777	33.7429	18.1441	24.5045
NCLIV_004821	NCLIV_004821	phospho-2-dehydro-3-deoxyheptonate+aldolase,related	FR823382:205922-212390	0.251294	1.19027	0.166433	0.358235	63.6096	50.6349	86.4454	62.725	33.7283	45.5517
NCLIV_004830	NCLIV_004830	hypothetical+protein	FR823382:218236-219962	-0.314562	-1.24363	0.0281237	0.0996897	143.312	114.08	194.76	95.408	51.3025	69.2866
NCLIV_004840	NCLIV_004840	conserved+hypothetical+protein	FR823382:227082-241970	0.285792	1.21908	0.0597503	0.174432	119.365	95.0172	162.216	120.533	64.8128	87.5329
NCLIV_004850	NCLIV_004850	hypothetical+protein	FR823382:247880-249779	-0.0140248	-1.00977	0.983063	1	3.77193	3.00255	5.12605	3.09137	1.66228	2.245
NCLIV_004860	NCLIV_004860	hypothetical+protein	FR823382:253429-267884	-0.754168	-1.68666	3.71415e-07	5.64006e-06	196.875	156.718	267.553	96.6142	51.9511	70.1625
NCLIV_004870	NCLIV_004870	putative+DNA+gyrase+subunit+A	FR823382:271080-282415	-0.0440318	-1.03099	0.74789	0.903331	186.367	148.353	253.273	149.696	80.4943	108.712
NCLIV_004880	NCLIV_004880	conserved+hypothetical+protein	FR823382:285827-287864	0.434089	1.35106	0.018342	0.0714887	55.6892	44.33	75.6816	62.3518	33.5276	45.2807
NCLIV_004890	NCLIV_004890	conserved+hypothetical+protein	FR823382:291448-293864	-0.346761	-1.2717	0.309924	0.541296	19.0358	15.153	25.8696	12.3699	6.65153	8.98322
NCLIV_004900	NCLIV_004900	hypothetical+protein	FR823382:295157-299700	-0.363592	-1.28663	0.0958914	0.248425	55.5294	44.2028	75.4644	35.7148	19.2045	25.9366
NCLIV_004910	NCLIV_004910	conserved+hypothetical+protein	FR823382:302097-308556	-0.631381	-1.54905	0.0473365	0.146929	25.5035	20.3014	34.6592	13.5919	7.30862	9.87065
NCLIV_004920	NCLIV_004920	hypothetical+protein	FR823382:310586-311938	0.315234	1.24421	0.00144203	0.00854753	654.595	521.074	889.594	674.515	362.698	489.842
NCLIV_004930	NCLIV_004930	conserved+hypothetical+protein	FR823382:315123-320749	0.0703681	1.04998	0.644222	0.8393	102.306	81.4378	139.033	88.9643	47.8376	64.6071
NCLIV_004940	NCLIV_004940	proteophosphoglycan+ppg4,+related	FR823382:324776-330886	-0.0866957	-1.06194	0.461515	0.683563	342.628	272.741	465.631	267.189	143.672	194.036
NCLIV_004950	NCLIV_004950	putative+actin	FR823382:337498-341642	-0.0293303	-1.02054	0.827741	0.957437	189.957	151.211	258.152	154.144	82.886	111.942
NCLIV_004960	NCLIV_004960	putative+kinesin+motor+domain+cointaining+protein	FR823382:344569-352242	0.983924	1.97784	0.10684	0.269212	3.16561	2.51991	4.30206	5.30539	2.8528	3.85285
NCLIV_004970	NCLIV_004970	conserved+hypothetical+protein	FR823382:354955-356217	0.316043	1.24491	0.466126	0.687051	8.9453	7.12069	12.1567	9.25386	4.97596	6.72028
NCLIV_004980	NCLIV_004980	hypothetical+protein	FR823382:356568-363649	-0.333201	-1.25981	0.139637	0.324644	55.2694	43.9959	75.1111	36.3054	19.522	26.3655
NCLIV_004990	NCLIV_004990	spry+domain+containing+protein,+related	FR823382:367821-371142	0.173177	1.12754	0.488452	0.707577	32.6269	25.9719	44.34	30.4815	16.3904	22.1361
NCLIV_005000	NCLIV_005000	putative+phosphoglycerate+mutase+family+protein	FR823382:374760-383768	-0.0244125	-1.01707	0.91085	1	53.3962	42.5047	72.5654	43.475	23.3773	31.5721
NCLIV_005010	NCLIV_005010	conserved+hypothetical+protein	FR823382:384475-390741	-0.137342	-1.09988	0.234343	0.449692	307.137	244.489	417.399	231.244	124.344	167.933
NCLIV_005020	NCLIV_005020	putative+PUA+domain-containing,+cell+cycle+regulator+protein	FR823382:393293-395368	0.395024	1.31496	0.0400679	0.130988	55.0298	43.8051	74.7855	59.9642	32.2438	43.5468
NCLIV_005030	NCLIV_005030	putative+dual+specificity+protein+phosphatase,+catalytic+domain-containing+protein	FR823382:398129-401098	0.045602	1.03211	0.740542	0.898678	146.902	116.938	199.639	125.566	67.5189	91.1876
NCLIV_005040	NCLIV_005040	conserved+hypothetical+protein	FR823382:402473-403926	0.207532	1.15471	0.0688668	0.194565	322.232	256.505	437.913	308.157	165.701	223.788
NCLIV_005050	NCLIV_005050	putative+coatomer+delta+subunit	FR823382:407193-412395	-0.0124373	-1.00866	0.934676	1	105.707	84.1454	143.656	86.7874	46.6671	63.0262
NCLIV_005060	NCLIV_005060	conserved+hypothetical+protein	FR823382:414206-417309	0.305824	1.23612	0.173131	0.36411	40.2764	32.061	54.7356	41.2611	22.1868	29.9644
NCLIV_005070	NCLIV_005070	conserved+hypothetical+protein	FR823382:419950-426885	-0.17718	-1.13067	0.297352	0.528813	89.2069	71.011	121.232	65.3246	35.1261	47.4396
NCLIV_005080	NCLIV_005080	putative+CMGC+kinase,+MAPK+family,+MEK+kinase-related+(incomplete+catalytic+triad)	FR823382:430986-431741	-1.6981	-3.24473	0.0126786	0.0533386	7.25948	5.77873	9.86563	1.76723	0.950269	1.28338
NCLIV_005090	NCLIV_005090	putative+TBP-binding+protein+ABT1	FR823382:436532-439194	-2.39155	-5.24719	0.172851	0.36411	0.63341	0.504211	0.860804	0	0	0
NCLIV_005100	NCLIV_005100	gd15873,+related	FR823382:441071-442087	-0.228024	-1.17123	0.447692	0.668442	25.5901	20.3704	34.777	18.077	9.72029	13.1277
NCLIV_005110	NCLIV_005110	putative+ftsJ-like+methyltransferase+domain-containing+protein	FR823382:446604-458715	-0.200724	-1.14927	0.169757	0.363777	136.617	108.75	185.662	98.4263	52.9255	71.4785
NCLIV_005120	NCLIV_005120	dsptp1+protein,+related	FR823382:462496-465168	0.595304	1.51079	1.53751e-08	3.2243e-07	526.741	419.299	715.841	659.095	354.407	478.644
NCLIV_005130	NCLIV_005130	conserved+hypothetical+protein	FR823382:466685-470907	-1.20734	-2.30912	0.00138737	0.00823588	22.5139	17.9217	30.5964	8.00361	4.30368	5.81233
NCLIV_005140	NCLIV_005140	putative+ubiquitin+carboxyl-terminal+hydrolase	FR823382:475813-480787	-0.398793	-1.3184	0.0125857	0.0531066	111.454	88.7202	151.466	69.9791	37.629	50.8198
NCLIV_005150	NCLIV_005150	hypothetical+protein	FR823382:484032-486385	-0.751078	-1.68305	1.04015e-12	3.99759e-11	690.937	550.004	938.983	339.924	182.783	246.857
NCLIV_005160	NCLIV_005160	putative+ppg3	FR823382:492201-500491	-3.98815	-15.8691	0.0110379	0.047654	2.21721	1.76495	3.01318	0	0	0
NCLIV_005170	NCLIV_005170	putative+ppg3	FR823382:503835-507460	-0.443508	-1.35991	0.183631	0.378324	21.2685	16.9302	28.9038	12.9183	6.9464	9.38146
NCLIV_005180	NCLIV_005180	hypothetical+protein	FR823382:511839-523334	0.110702	1.07975	0.45789	0.679543	117.113	93.2253	159.157	104.732	56.3162	76.0578
NCLIV_005190	NCLIV_005190	putative+transcription+elongation+factor+FACT+140+kDa	FR823382:531254-538739	-0.0579581	-1.04099	0.677387	0.861211	140.553	111.884	191.011	111.809	60.1217	81.1974
NCLIV_005200	NCLIV_005200	hypothetical+protein	FR823382:565908-581148	0.349004	1.27368	0.14403	0.331447	33.8967	26.9827	46.0656	35.7865	19.243	25.9886
NCLIV_005210	NCLIV_005210	conserved+hypothetical+protein	FR823382:587311-593151	0.206802	1.15413	0.305074	0.536499	54.9813	43.7665	74.7196	52.5687	28.2671	38.1761
NCLIV_005220	NCLIV_005220	conserved+hypothetical+protein	FR823382:594577-598627	0.156496	1.11458	0.375785	0.59843	73.337	58.3782	99.665	67.7064	36.4069	49.1693
NCLIV_005230	NCLIV_005230	tbc+domain-containing+protein,related	FR823382:599982-610335	0.00546319	1.00379	0.97367	1	86.2521	68.6589	117.216	71.7006	38.5546	52.0699
NCLIV_005240	NCLIV_005240	pollux,+isoform+A,+related	FR823382:615516-622465	0.351783	1.27614	0.129594	0.306942	33.4974	26.6648	45.5229	35.4342	19.0536	25.7328
NCLIV_005250	NCLIV_005250	putative+subtilisin-like+serine+protease	FR823382:626158-638849	0.697982	1.62223	0.0694121	0.195666	10.1056	8.04431	13.7335	13.6528	7.34134	9.91485
NCLIV_005260	NCLIV_005260	conserved+hypothetical+protein	FR823382:641570-643381	2.19718	4.58583	0.16028	0.34968	0	0	0	0.442555	0.23797	0.32139
NCLIV_005270	NCLIV_005270	conserved+hypothetical+protein	FR823382:646090-648935	-0.0101926	-1.00709	0.969307	1	31.7833	25.3003	43.1935	26.1358	14.0537	18.9802
NCLIV_005280	NCLIV_005280	conserved+hypothetical+protein	FR823382:659192-665015	0.477613	1.39244	0.000313836	0.00227844	138.406	110.175	188.094	159.65	85.8464	115.94
NCLIV_005290	NCLIV_005290	nb-ARC+domain+protein,+related	FR823382:668007-686815	0.71771	1.64457	0.000265505	0.00195807	44.579	35.486	60.5829	60.7932	32.6895	44.1488
NCLIV_005300	NCLIV_005300	putative+awp1+protein	FR823382:689438-692788	0.0829927	1.05921	0.717968	0.880538	36.7384	29.2447	49.9275	32.2334	17.3325	23.4083
NCLIV_005310	NCLIV_005310	loc397781+protein,+related	FR823382:699725-701599	0.353191	1.27738	0.00144679	0.00856134	298.016	237.228	405.003	315.292	169.538	228.969
NCLIV_005320	NCLIV_005320	hypothetical+protein	FR823382:703927-706832	0.421214	1.33905	0.479599	0.699235	4.42467	3.52215	6.01312	4.94604	2.65957	3.59188
NCLIV_005330	NCLIV_005330	at4g25910+protein,+related	FR823382:707310-711364	-1.14305	-2.20847	4.46042e-05	0.000410579	39.1075	31.1306	53.147	14.5971	7.84909	10.6006
NCLIV_005340	NCLIV_005340	conserved+hypothetical+protein	FR823382:714212-714826	0.552257	1.46638	0.714428	0.880067	0.317124	0.252439	0.430971	0.442555	0.23797	0.32139
NCLIV_005350	NCLIV_005350	hypothetical+protein	FR823382:716469-725937	0.0876343	1.06263	0.52062	0.740366	161.337	128.428	219.257	141.985	76.3478	103.111
NCLIV_005360	NCLIV_005360	putative+splicing+factor+3a+protein	FR823382:729455-734325	-0.307995	-1.23799	0.0458007	0.145076	116.529	92.7601	158.363	77.9268	41.9026	56.5915
NCLIV_005370	NCLIV_005370	conserved+hypothetical+protein	FR823382:737414-738668	-0.157018	-1.11498	0.484492	0.704609	44.8629	35.7121	60.9687	33.3079	17.9102	24.1887
NCLIV_005380	NCLIV_005380	putative+ww+domain+U1+zinc+finger+domain-containing+protein	FR823382:740451-743980	-0.233326	-1.17554	0.252414	0.473578	59.9548	47.7256	81.4785	42.2192	22.702	30.6601
NCLIV_005390	NCLIV_005390	conserved+hypothetical+protein	FR823382:745590-747515	-0.0101756	-1.00708	0.96391	1	42.9062	34.1544	58.3095	35.2822	18.9718	25.6224
NCLIV_005400	NCLIV_005400	brx1,+related	FR823382:749694-753833	0.174123	1.12828	0.232374	0.447118	108.186	86.1186	147.024	101.102	54.3642	73.4216
NCLIV_005410	NCLIV_005410	putative+ubiquitin-like+domain-containing+CTD+phosphatase+1	FR823382:756902-761713	-0.219881	-1.16464	0.23829	0.454691	76.2587	60.7039	103.636	54.2079	29.1485	39.3665
NCLIV_005420	NCLIV_005420	phosphoglycerate+kinase,+related	FR823382:765400-768763	-2.99157	-7.95341	1.46605e-14	7.00698e-13	39.2401	31.2362	53.3273	3.97771	2.13888	2.88866
NCLIV_005430	NCLIV_005430	conserved+hypothetical+protein	FR823382:771417-776240	-0.156825	-1.11483	0.463861	0.684997	51.4766	40.9767	69.9566	38.2264	20.555	27.7605
NCLIV_005440	NCLIV_005440	putative+mog1+protein	FR823382:779849-781692	0.623643	1.54076	9.88482e-07	1.37678e-05	147.533	117.44	200.497	188.314	101.259	136.756
NCLIV_005450	NCLIV_005450	conserved+hypothetical+protein	FR823382:787270-791682	-0.256722	-1.19476	0.163442	0.353943	74.0873	58.9754	100.685	51.3325	27.6024	37.2784
NCLIV_005460	NCLIV_005460	hypothetical+protein	FR823382:796605-804336	0.365652	1.28846	0.0587653	0.171758	52.7776	42.0123	71.7247	56.3501	30.3004	40.9222
NCLIV_005470	NCLIV_005470	putative+elongation+factor+1-alpha	FR823382:807202-810585	-0.485931	-1.40049	0.0280362	0.099447	51.5429	41.0295	70.0468	30.4432	16.3698	22.1082
NCLIV_005480	NCLIV_005480	hypothetical+protein	FR823382:857944-859056	0	1	1	1	0	0	0	0	0	0
NCLIV_005490	NCLIV_005490	conserved+hypothetical+protein	FR823382:863650-865694	-0.681626	-1.60395	0.040649	0.132176	23.9613	19.0738	32.5633	12.3251	6.62742	8.95066
NCLIV_005500	NCLIV_005500	conserved+hypothetical+protein	FR823382:866884-870294	0.267919	1.20407	0.0233617	0.0864012	276.357	219.987	375.569	275.591	148.19	200.138
NCLIV_005510	NCLIV_005510	hypothetical+protein	FR823382:874855-879279	-0.356592	-1.2804	0.0395315	0.129902	89.9891	71.6337	122.295	58.1763	31.2824	42.2484
NCLIV_005520	NCLIV_005520	conserved+hypothetical+protein	FR823382:881140-888529	-0.138409	-1.10069	0.3471	0.56817	135.783	108.087	184.529	102.151	54.9283	74.1834
NCLIV_005530	NCLIV_005530	os07g0295200+protein,+related	FR823382:890055-890651	-0.0733059	-1.05212	0.701409	0.878723	64.4913	51.3367	87.6436	50.7557	27.2922	36.8595
NCLIV_005540	NCLIV_005540	hypothetical+protein	FR823382:892058-902831	-0.0643812	-1.04564	0.761877	0.913747	50.7766	40.4195	69.0054	40.2096	21.6214	29.2008
NCLIV_005550	NCLIV_005550	hypothetical+protein	FR823382:911453-918108	-0.684037	-1.60663	1.08307e-05	0.00011893	192.454	153.198	261.545	99.1534	53.3165	72.0065
NCLIV_005560	NCLIV_005560	putative+dense-granule+antigen+DG32	FR823382:922040-923484	-0.0151958	-1.01059	0.877265	0.98641	1097.03	873.262	1490.86	898.974	483.394	652.847
NCLIV_005570	NCLIV_005570	conserved+hypothetical+protein	FR823382:926116-926388	-0.254044	-1.19255	0.558906	0.771133	11.6545	9.27732	15.8385	8.07112	4.33998	5.86136
NCLIV_005580	NCLIV_005580	hypothetical+protein	FR823382:929255-930826	-1.64645	-3.13063	0.334245	0.555356	0.31746	0.252706	0.431428	0	0	0
NCLIV_005590	NCLIV_005590	conserved+hypothetical+protein	FR823382:933761-939303	0.407431	1.32632	0.101487	0.258857	27.2354	21.6801	37.013	29.9554	16.1075	21.754
NCLIV_005600	NCLIV_005600	hypothetical+protein	FR823382:942356-947843	-0.619138	-1.53596	0.0106866	0.0464331	48.5989	38.686	66.0459	26.1611	14.0673	18.9985
NCLIV_005610	NCLIV_005610	membrane+protein,+related	FR823382:949075-952729	-0.0887703	-1.06346	0.704691	0.880067	45.8167	36.4713	62.2649	35.6711	19.181	25.9048
NCLIV_005620	NCLIV_005620	putative+articulin+4	FR823382:957189-960150	-0.685721	-1.60851	1.95219e-09	4.74121e-08	457.708	364.347	622.025	235.604	126.688	171.099
NCLIV_005630	NCLIV_005630	conserved+hypothetical+protein	FR823382:962944-971600	0.356607	1.28041	0.00645663	0.0305074	145.055	115.468	197.13	153.846	82.7254	111.725
NCLIV_005640	NCLIV_005640	conserved+hypothetical+protein	FR823382:977115-980240	0.461362	1.37684	3.21091e-05	0.000309309	315.489	251.137	428.749	359.774	193.456	261.272
NCLIV_005650	NCLIV_005650	conserved+hypothetical+protein	FR823382:983131-988650	0.0601988	1.04261	0.677977	0.861304	121.839	96.9869	165.579	105.205	56.5707	76.4016
NCLIV_005660	NCLIV_005660	hypothetical+protein	FR823382:991459-991743	0	1	1	1	0	0	0	0	0	0
NCLIV_005670	NCLIV_005670	conserved+hypothetical+protein	FR823382:993762-996362	-2.35396	-5.11225	5.20637e-16	3.03271e-14	57.9885	46.1603	78.8063	9.294	4.99754	6.74943
NCLIV_005680	NCLIV_005680	conserved+hypothetical+protein	FR823382:997847-999191	-0.251472	-1.19042	0.446633	0.668099	19.5976	15.6002	26.6332	13.6142	7.32057	9.88679
NCLIV_005690	NCLIV_005690	hypothetical+protein	FR823382:1000671-1001529	-0.234273	-1.17631	0.350119	0.571347	34.4958	27.4595	46.8797	24.267	13.0488	17.623
NCLIV_005700	NCLIV_005700	conserved+hypothetical+protein	FR823382:1002804-1007922	-1.37098	-2.58646	5.759e-06	6.73027e-05	37.5299	29.8748	51.0031	11.9407	6.42072	8.6715
NCLIV_005710	NCLIV_005710	conserved+hypothetical+protein	FR823382:1012808-1017534	0.383858	1.30483	0.0740016	0.205038	44.7982	35.6605	60.8808	48.4456	26.05	35.1818
NCLIV_005720	NCLIV_005720	conserved+hypothetical+protein	FR823382:1020221-1028476	-0.677607	-1.59948	0.0255386	0.0922557	27.2918	21.725	37.0895	14.0847	7.57357	10.2285
NCLIV_005730	NCLIV_005730	gk24670,+related	FR823382:1032846-1037901	-0.138909	-1.10107	0.718568	0.880756	14.1803	11.2879	19.271	10.6529	5.72825	7.73629
NCLIV_005740	NCLIV_005740	conserved+hypothetical+protein	FR823382:1039632-1045837	-1.04061	-2.05709	4.32791e-08	8.16934e-07	91.3104	72.6855	124.091	36.6963	19.7322	26.6493
NCLIV_005750	NCLIV_005750	conserved+hypothetical+protein	FR823382:1048570-1056485	-0.0223521	-1.01561	0.902022	0.996097	67.7058	53.8955	92.0121	55.2059	29.6851	40.0913
NCLIV_005760	NCLIV_005760	putative+SRS13	FR823382:1058876-1060939	-0.200505	-1.1491	0.886281	0.991316	0.635251	0.505676	0.863306	0.441952	0.237645	0.320951
NCLIV_005770	NCLIV_005770	hypothetical+protein	FR823382:1065283-1073543	-0.15362	-1.11236	0.223601	0.434731	208.429	165.915	283.254	155.161	83.4329	112.68
NCLIV_005780	NCLIV_005780	conserved+hypothetical+protein	FR823382:1087871-1088746	-0.382949	-1.304	0.106073	0.268094	45.0499	35.8609	61.2228	28.5814	15.3687	20.7562
NCLIV_005790	NCLIV_005790	conserved+hypothetical+protein	FR823382:1090801-1094922	-1.25575	-2.38791	0.000372747	0.00264434	25.6035	20.3811	34.7952	8.80789	4.73616	6.39641
NCLIV_005800	NCLIV_005800	unspecified+product	FR823382:1099690-1108304	-1.04996	-2.07048	0.000483005	0.00333981	31.0749	24.7364	42.2307	12.3654	6.64909	8.97993
NCLIV_005810	NCLIV_005810	conserved+hypothetical+protein	FR823382:1113063-1114778	0.451868	1.36781	0.117565	0.287587	20.284	16.1466	27.5659	23.0217	12.3791	16.7187
NCLIV_005820	NCLIV_005820	putative+ubiquitin-transferase+domain+containing+protein	FR823382:1117285-1129542	0.714737	1.64118	5.26503e-09	1.18241e-07	169.439	134.878	230.267	230.369	123.873	167.297
NCLIV_005830	NCLIV_005830	hypothetical+protein	FR823382:1135762-1164612	0.396647	1.31644	0.00230878	0.0128082	220.707	175.689	299.941	240.655	129.404	174.767
NCLIV_005840	NCLIV_005840	hypothetical+protein	FR823382:1168794-1170554	0.154484	1.11302	0.894973	0.994771	0.946817	0.75369	1.28672	0.885779	0.476298	0.643264
NCLIV_005850	NCLIV_005850	conserved+hypothetical+protein	FR823382:1171244-1173560	2.19522	4.57958	0.160461	0.34968	0	0	0	0.441952	0.237645	0.320951
NCLIV_005860	NCLIV_005860	IMP-specific+5'-nucleotidase,+related	FR823382:1176055-1180727	0.422861	1.34058	0.000256185	0.00189684	275.752	219.505	374.746	306.18	164.638	222.352
NCLIV_005870	NCLIV_005870	granule-bound+starch+synthase+WX-TsB+protein,related	FR823382:1183402-1212491	0.0477348	1.03364	0.733261	0.892603	132.363	105.364	179.881	113.308	60.9274	82.2855
NCLIV_005880	NCLIV_005880	putative+serine/threonine+protein+phosphatase	FR823382:1215835-1221098	-0.379809	-1.30117	0.0451202	0.1434	86.5796	68.9196	117.662	55.0762	29.6154	39.9971
NCLIV_005890	NCLIV_005890	conserved+hypothetical+protein	FR823382:1222213-1222518	0.264664	1.20136	0.150707	0.343316	77.989	62.0812	105.987	77.6126	41.7336	56.3633
NCLIV_005900	NCLIV_005900	translation+INITIATION+FACTOR+3+SUBUNIT+9-like+protein,+related	FR823382:1224956-1234747	-0.353345	-1.27752	0.000666377	0.004366	578.405	460.425	786.051	374.92	201.601	272.272
NCLIV_005910	NCLIV_005910	conserved+hypothetical+protein	FR823382:1236337-1237892	-0.20985	-1.15657	0.338108	0.558346	53.064	42.2403	72.1139	37.9779	20.4213	27.58
NCLIV_005920	NCLIV_005920	conserved+hypothetical+protein	FR823382:1240584-1245754	0.241495	1.18222	0.215016	0.422773	58.83	46.8302	79.9499	57.6191	30.9828	41.8437
NCLIV_005930	NCLIV_005930	putative+phosphoserine+phosphatase	FR823382:1248138-1261625	0.161062	1.11811	0.156641	0.34968	599.259	477.026	814.393	554.902	298.38	402.977
NCLIV_005940	NCLIV_005940	putative+phosphoglycerate+mutase+family+protein	FR823382:1265056-1268684	-0.0418081	-1.0294	0.839881	0.96459	62.9465	50.1071	85.5443	50.6377	27.2288	36.7738
NCLIV_005950	NCLIV_005950	putative+trafficking+protein+particle+complex+protein	FR823382:1271436-1271858	-1.19078	-2.28276	3.22817e-05	0.000310571	36.7835	29.2806	49.9888	13.2748	7.13808	9.64034
NCLIV_005960	NCLIV_005960	fibronectin-binding+A+domain+protein,+related	FR823382:1275138-1277085	0.016798	1.01171	0.90027	0.995995	180.635	143.79	245.483	151.344	81.3801	109.908
NCLIV_005970	NCLIV_005970	putative+oocyst+wall+protein	FR823382:1279477-1281067	1.20874	2.31135	6.1123e-25	6.51047e-23	207.371	165.073	281.817	397.098	213.526	288.378
NCLIV_005980	NCLIV_005980	putative+14+kDa+phosphohistidine+phosphatase	FR823382:1282991-1284154	-0.567976	-1.48244	0.00585711	0.0279761	73.0691	58.1649	99.3009	40.7791	21.9276	29.6143
NCLIV_005990	NCLIV_005990	deha2d02640p,+related	FR823382:1289739-1299414	0.0489906	1.03454	0.808802	0.944024	53.2243	42.3679	72.3318	45.6038	24.5219	33.1181
NCLIV_006000	NCLIV_006000	hypothetical+protein	FR823382:1302141-1307686	-0.521677	-1.43562	0.010741	0.0465609	65.6987	52.2979	89.2845	37.8611	20.3586	27.4952
NCLIV_006010	NCLIV_006010	putative+PAN+domain+containing+protein	FR823382:1308599-1315048	1.81791	3.52569	0.038224	0.126581	0.951454	0.757382	1.29303	3.09024	1.66168	2.24418
NCLIV_006020	NCLIV_006020	putative+ribosomal+protein+S18+domain+containing+protein	FR823382:1317850-1321353	-0.621443	-1.53841	0.0189847	0.0733419	41.451	32.9961	56.3319	22.2698	11.9748	16.1726
NCLIV_006030	NCLIV_006030	putative+dynein+light+chain	FR823382:1327338-1327607	-0.260733	-1.19809	0.068502	0.194202	149.426	118.947	203.069	103.265	55.5274	74.9926
NCLIV_006040	NCLIV_006040	putative+coproporphyrinogen+oxidase	FR823382:1330050-1331072	-0.199106	-1.14799	0.357674	0.579114	49.9151	39.7337	67.8347	35.9926	19.3538	26.1383
NCLIV_006050	NCLIV_006050	conserved+hypothetical+protein	FR823382:1334929-1336731	-1.64645	-3.13063	0.334245	0.555356	0.31746	0.252706	0.431428	0	0	0
NCLIV_006060	NCLIV_006060	conserved+hypothetical+protein	FR823382:1338596-1340169	-0.282341	-1.21617	0.0304867	0.10607	193.747	154.227	263.302	131.908	70.9292	95.7935
NCLIV_006070	NCLIV_006070	30s+ribosomal+protein+S10P,+related	FR823382:1343535-1345038	-0.10309	-1.07407	0.280816	0.510176	1067.77	849.972	1451.1	823.274	442.688	597.873
NCLIV_006080	NCLIV_006080	putative+MORN+repeat-containing+protein	FR823382:1348603-1373332	-0.718954	-1.64599	0.012278	0.0520438	33.621	26.7632	45.6909	16.8666	9.06948	12.2488
NCLIV_006090	NCLIV_006090	conserved+hypothetical+protein	FR823382:1377486-1379757	0.0520447	1.03673	0.668967	0.855396	263.893	210.066	358.631	226.573	121.832	164.541
NCLIV_006100	NCLIV_006100	conserved+hypothetical+protein	FR823382:1383408-1393165	0.523349	1.43729	1.28773e-05	0.000137162	217.993	173.528	296.253	259.527	139.552	188.472
NCLIV_006110	NCLIV_006110	conserved+hypothetical+protein	FR823382:1399069-1401092	-1.31455	-2.48724	7.39228e-08	1.30609e-06	57.1086	45.4599	77.6106	18.9409	10.1849	13.7552
NCLIV_006120	NCLIV_006120	hypothetical+protein	FR823382:1404720-1407753	-0.149762	-1.10939	0.340101	0.560397	105.319	83.8368	143.129	78.6074	42.2685	57.0858
NCLIV_006130	NCLIV_006130	conserved+hypothetical+protein	FR823382:1410711-1412082	2.19522	4.57958	0.160461	0.34968	0	0	0	0.441952	0.237645	0.320951
NCLIV_006140	NCLIV_006140	ubiquitin,+related	FR823382:1422092-1432405	-0.121356	-1.08776	0.507522	0.726134	77.0054	61.2983	104.65	58.6154	31.5185	42.5673
NCLIV_006150	NCLIV_006150	tRNAbinding+domain+containing+protein,+related	FR823382:1433727-1438228	-0.109412	-1.07879	0.44293	0.664849	150.122	119.501	204.016	115.232	61.9623	83.6832
NCLIV_006160	NCLIV_006160	multi-pass+transmembrane+protein,+related	FR823382:1450640-1463359	0.185848	1.13749	0.198716	0.400008	117.186	93.2831	159.256	110.406	59.3674	80.1786
NCLIV_006170	NCLIV_006170	phosphoglycerate+mutase,+related	FR823382:1477940-1481822	-0.170198	-1.12521	0.142492	0.329573	336.489	267.854	457.288	247.636	133.158	179.837
NCLIV_006180	NCLIV_006180	putative+duplicated+carbonic+anhydrase	FR823382:1484605-1486494	-0.035708	-1.02506	0.727569	0.88843	1242.69	989.212	1688.81	1003.96	539.846	729.089
NCLIV_006190	NCLIV_006190	conserved+hypothetical+protein	FR823382:1489838-1491879	0.115144	1.08308	0.618507	0.821444	40.9189	32.5725	55.6087	36.711	19.7401	26.6601
NCLIV_006200	NCLIV_006200	hypothetical+protein	FR823382:1493704-1494825	0.591779	1.5071	0.130815	0.309378	9.88021	7.8649	13.4272	12.3948	6.66487	9.00124
NCLIV_006205	NCLIV_006205	hypothetical+protein	FR823382:1498731-1499975	-0.0389684	-1.02738	0.875083	0.985283	33.9253	27.0054	46.1045	27.3431	14.7029	19.857
NCLIV_006210	NCLIV_006210	hypothetical+protein	FR823382:1502167-1511407	-0.0565054	-1.03994	0.691978	0.87196	134.913	107.394	183.347	107.432	57.7678	78.0183
NCLIV_006220	NCLIV_006220	conserved+hypothetical+protein	FR823382:1515320-1519465	-0.672722	-1.59408	0.0014779	0.00871776	75.5033	60.1026	102.609	39.1772	21.0662	28.451
NCLIV_006230	NCLIV_006230	conserved+hypothetical+protein	FR823382:1521819-1523569	-0.419452	-1.33742	0.0509206	0.154775	56.0213	44.5944	76.1329	34.657	18.6357	25.1684
NCLIV_006240	NCLIV_006240	hypothetical+protein	FR823382:1529324-1530879	-0.103413	-1.07431	0.656203	0.847506	44.152	35.1461	60.0026	34.0271	18.297	24.711
NCLIV_006250	NCLIV_006250	putative+MORN+repeat-containing+protein	FR823382:1533294-1537252	-1.05371	-2.07586	0.405325	0.6302	1.26591	1.0077	1.72037	0.441103	0.237189	0.320335
NCLIV_006260	NCLIV_006260	conserved+hypothetical+protein	FR823382:1542204-1545974	0.272936	1.20826	0.196909	0.398198	43.4847	34.615	59.0957	43.5378	23.411	31.6177
NCLIV_006270	NCLIV_006270	50s+ribosomal+protein+L17,+related	FR823382:1549373-1552067	0.559305	1.47356	0.0310375	0.107505	26.7261	21.2746	36.3207	32.6719	17.5682	23.7268
NCLIV_006280	NCLIV_006280	conserved+hypothetical+protein	FR823382:1554534-1559890	-0.0694259	-1.0493	0.74102	0.89882	57.1558	45.4975	77.6746	45.1043	24.2533	32.7553
NCLIV_006290	NCLIV_006290	conserved+hypothetical+protein	FR823382:1564768-1578875	-0.195852	-1.1454	0.162947	0.353281	140.264	111.654	190.619	101.397	54.523	73.636
NCLIV_006300	NCLIV_006300	putative+very+long-chain+acyl-CoA+synthetase	FR823382:1581916-1586298	0.100985	1.07251	0.650038	0.843577	43.6819	34.7719	59.3637	38.8067	20.867	28.1819
NCLIV_006320	NCLIV_006320	hypothetical+protein	FR823382:1588132-1594312	0.105433	1.07582	0.471247	0.690299	126.464	100.669	171.865	112.681	60.5904	81.8303
NCLIV_006330	NCLIV_006330	hypothetical+protein	FR823382:1597325-1603077	-1.1835	-2.27127	0.000101253	0.000861805	35.5753	28.3189	48.3468	12.9012	6.93718	9.36901
NCLIV_006340	NCLIV_006340	conserved+hypothetical+protein	FR823382:1606221-1609421	-0.707536	-1.63301	0.121828	0.294918	11.3834	9.06149	15.4701	5.72514	3.0785	4.15767
NCLIV_006350	NCLIV_006350	conserved+hypothetical+protein	FR823382:1610665-1611300	-2.39155	-5.24719	0.172851	0.36411	0.63341	0.504211	0.860804	0	0	0
NCLIV_006360	NCLIV_006360	conserved+hypothetical+protein	FR823382:1618089-1618723	3.03106	8.17411	0.0472779	0.146929	0	0	0	0.885585	0.476194	0.643124
NCLIV_006370	NCLIV_006370	conserved+hypothetical+protein	FR823382:1623131-1627217	-1.64493	-3.12732	0.334449	0.555356	0.317124	0.252439	0.430971	0	0	0
NCLIV_006380	NCLIV_006380	conserved+hypothetical+protein	FR823382:1628519-1635831	0.645686	1.56448	0.00110182	0.00674481	44.1914	35.1775	60.056	57.3242	30.8242	41.6296
NCLIV_006390	NCLIV_006390	conserved+hypothetical+protein	FR823382:1639594-1649994	0.378656	1.30013	0.0551981	0.163576	51.8519	41.2755	70.4668	55.8658	30.04	40.5705
NCLIV_006400	NCLIV_006400	conserved+hypothetical+protein	FR823382:1659828-1664543	-0.0324148	-1.02272	0.783142	0.926254	324.244	258.106	440.647	262.55	141.178	190.668
NCLIV_006410	NCLIV_006410	conserved+hypothetical+protein	FR823382:1666106-1667839	-0.241319	-1.18207	0.502865	0.721726	17.1202	13.6281	23.2664	11.9747	6.43898	8.69617
NCLIV_006420	NCLIV_006420	conserved+hypothetical+protein	FR823382:1668062-1677868	0.284201	1.21774	0.240686	0.457643	31.0753	24.7367	42.2313	31.3651	16.8655	22.7777
NCLIV_006430	NCLIV_006430	conserved+hypothetical+protein	FR823382:1679577-1701716	1.34795	2.54549	9.52849e-08	1.64075e-06	21.3842	17.0223	29.061	45.2669	24.3408	32.8734
NCLIV_006440	NCLIV_006440	conserved+hypothetical+protein	FR823382:1705685-1709728	0.389308	1.30977	0.000651945	0.00429029	279.436	222.438	379.753	303.134	163.001	220.14
NCLIV_006450	NCLIV_006450	conserved+hypothetical+protein	FR823382:1712033-1714100	-0.239833	-1.18086	0.653241	0.845144	6.99347	5.56698	9.50413	4.88528	2.6269	3.54776
NCLIV_006460	NCLIV_006460	putative+beta-tubulin+cofactor+d	FR823382:1715550-1726362	0.2111	1.15757	0.233573	0.448499	70.5833	56.1861	95.9226	67.6815	36.3935	49.1512
NCLIV_006470	NCLIV_006470	conserved+hypothetical+protein	FR823382:1730525-1733648	0.195751	1.14532	0.0979509	0.252365	362.038	288.192	492.01	343.407	184.656	249.387
NCLIV_006480	NCLIV_006480	hypothetical+protein	FR823382:1750523-1754833	-0.214067	-1.15995	0.263065	0.487976	66.0065	52.5429	89.7028	47.1083	25.3309	34.2107
NCLIV_006490	NCLIV_006490	putative+myosin+light+chain+2	FR823382:1760523-1766122	-0.184726	-1.1366	0.153695	0.347735	204.975	163.166	278.561	149.332	80.2985	108.447
NCLIV_006500	NCLIV_006500	conserved+hypothetical+protein	FR823382:1769926-1782378	0.303637	1.23425	0.369014	0.591878	16.0329	12.7626	21.7888	16.4152	8.82674	11.921
NCLIV_006510	NCLIV_006510	putative+TCP-1/cpn60+family+chaperonin	FR823382:1783314-1789982	-1.21204	-2.31665	3.27385e-14	1.49753e-12	158.343	126.045	215.189	56.5326	30.3985	41.0547
NCLIV_006520	NCLIV_006520	hypothetical+protein	FR823382:1791750-1796467	-0.0607917	-1.04304	0.777435	0.922871	48.2703	38.4244	65.5994	38.3206	20.6057	27.829
NCLIV_006530	NCLIV_006530	brct+domain+protein,+related	FR823382:1799451-1808558	-0.222928	-1.1671	0.18946	0.387441	88.99	70.8383	120.937	63.1278	33.9449	45.8443
NCLIV_006540	NCLIV_006540	DNA-directed+RNA+polymerase,related	FR823382:1810342-1825173	0.0559393	1.03954	0.711231	0.880067	110.421	87.8981	150.062	95.0635	51.1172	69.0364
NCLIV_006550	NCLIV_006550	hypothetical+protein	FR823382:1827664-1829541	0.101143	1.07262	0.753928	0.907831	18.2799	14.5512	24.8423	16.2467	8.73613	11.7986
NCLIV_006560	NCLIV_006560	hypothetical+protein	FR823382:1834462-1836542	0	1	1	1	0	0	0	0	0	0
NCLIV_006570	NCLIV_006570	putative+serine/threonine+protein+phosphatase	FR823382:1841451-1846611	0.312057	1.24148	0.00116336	0.00706355	642.828	511.708	873.603	660.933	355.395	479.979
NCLIV_006580	NCLIV_006580	conserved+hypothetical+protein	FR823382:1851308-1851808	-1.64226	-3.12154	0.334808	0.555356	0.316536	0.25197	0.430172	0	0	0
NCLIV_006590	NCLIV_006590	coiled-coil+domain-containing+protein+38,related	FR823382:1852447-1856705	-0.233274	-1.1755	0.77923	0.923785	2.5371	2.0196	3.44792	1.76888	0.951156	1.28458
NCLIV_006595	NCLIV_006595	unspecified+product	FR823382:1860357-1860822	-1.64226	-3.12154	0.334808	0.555356	0.316536	0.25197	0.430172	0	0	0
NCLIV_006600	NCLIV_006600	conserved+hypothetical+protein	FR823382:1864657-1872715	-0.047518	-1.03349	0.761772	0.913747	111.302	88.5991	151.259	89.1843	47.9559	64.7668
NCLIV_006610	NCLIV_006610	conserved+hypothetical+protein	FR823382:1876929-1880135	0.387781	1.30838	0.670389	0.856334	1.59398	1.26885	2.16622	1.76615	0.949691	1.2826
NCLIV_006620	NCLIV_006620	trehalose-6-phosphate+synthase+of+likely+plant+origin,+related	FR823382:1882578-1894488	0.0354064	1.02485	0.76908	0.917042	263.408	209.679	357.971	223.562	120.213	162.354
NCLIV_006630	NCLIV_006630	conserved+hypothetical+protein	FR823382:1900415-1901454	-0.156858	-1.11486	0.468746	0.68731	51.8198	41.2499	70.4231	38.4809	20.6918	27.9453
NCLIV_006640	NCLIV_006640	hypothetical+protein	FR823382:1903888-1919035	-0.142998	-1.1042	0.322037	0.554502	150.845	120.076	204.998	113.121	60.8272	82.1502
NCLIV_006650	NCLIV_006650	conserved+hypothetical+protein	FR823382:1920873-1921646	0.0740644	1.05268	0.687393	0.868973	68.4083	54.4548	92.9669	59.6429	32.071	43.3135
NCLIV_006660	NCLIV_006660	conserved+hypothetical+protein	FR823382:1923843-1925558	-0.0587704	-1.04158	0.759312	0.912596	65.6815	52.2842	89.2611	52.2176	28.0783	37.9212
NCLIV_006670	NCLIV_006670	hypothetical+protein	FR823382:1929159-1929644	-0.726463	-1.65458	0.235479	0.451344	6.2718	4.99252	8.52338	3.08966	1.66137	2.24376
NCLIV_006680	NCLIV_006680	hypothetical+protein	FR823382:1929800-1938040	-0.308719	-1.23861	0.310932	0.542422	23.7589	18.9127	32.2884	15.8619	8.52919	11.5191
NCLIV_006690	NCLIV_006690	conserved+hypothetical+protein	FR823382:1940708-1941613	0.278125	1.21262	0.362939	0.585224	18.9598	15.0925	25.7664	19.0652	10.2517	13.8454
NCLIV_006700	NCLIV_006700	structural+maintenance+of+chromosome+2,+related	FR823382:1944249-1948288	-1.23034	-2.34623	0.000149023	0.00119861	29.0648	23.1363	39.499	10.1876	5.47803	7.39836
NCLIV_006710	NCLIV_006710	smc2+protein,+related	FR823382:1950191-1961859	-0.6421	-1.5606	0.00472199	0.0234715	55.3803	44.0841	75.2618	29.344	15.7788	21.31
NCLIV_006720	NCLIV_006720	conserved+hypothetical+protein	FR823382:1972630-1974893	-0.142712	-1.10398	0.224788	0.436691	343.844	273.709	467.284	257.92	138.688	187.305
NCLIV_006730	NCLIV_006730	putative+armadillo/beta-catenin-like+repeat+protein	FR823382:1976466-1984978	0.144105	1.10505	0.901007	0.995995	0.95155	0.757458	1.29316	0.883809	0.475239	0.641834
NCLIV_006740	NCLIV_006740	putative+armadillo/beta-catenin-like+repeat-containing+protein	FR823382:1990770-1995950	-0.0372737	-1.02617	0.86434	0.979581	45.9417	36.5708	62.4348	37.0728	19.9347	26.9228
NCLIV_006750	NCLIV_006750	putative+DNA+primase,+large+subunit	FR823382:1998854-2008938	-0.20798	-1.15507	0.206984	0.412008	97.8378	77.8814	132.962	70.1304	37.7103	50.9296
NCLIV_006760	NCLIV_006760	branched-chain-amino-acid+aminotransferase,+related	FR823382:2016790-2019249	1.20194	2.30049	0.0217549	0.0817153	4.10672	3.26905	5.58102	7.98304	4.29261	5.79739
NCLIV_006770	NCLIV_006770	conserved+hypothetical+protein	FR823382:2020767-2025316	-0.822809	-1.76885	4.2398e-06	5.10694e-05	101.472	80.7743	137.9	47.4539	25.5168	34.4617
NCLIV_006780	NCLIV_006780	conserved+hypothetical+protein	FR823382:2027444-2028414	-0.338	-1.264	0.000301744	0.00219493	1218.43	969.899	1655.84	798.255	429.235	579.704
NCLIV_006790	NCLIV_006790	conserved+hypothetical+protein	FR823382:2030240-2034979	-0.521197	-1.43515	0.00174719	0.00999005	104.061	82.8353	141.419	60.0096	32.2682	43.5798
NCLIV_006800	NCLIV_006800	conserved+hypothetical+protein	FR823382:2037971-2041947	0.246181	1.18606	0.0387041	0.127633	238.737	190.04	324.443	234.517	126.104	170.309
NCLIV_006810	NCLIV_006810	conserved+hypothetical+protein	FR823382:2043519-2044715	0.688524	1.61163	0.468631	0.68731	1.26848	1.00974	1.72386	1.7685	0.950952	1.28431
NCLIV_006820	NCLIV_006820	conserved+hypothetical+protein	FR823382:2047110-2049518	-2.3942	-5.25686	0.172535	0.36411	0.63458	0.505142	0.862394	0	0	0
NCLIV_006830	NCLIV_006830	putative+HesB-like+domain+containing+protein	FR823382:2053589-2055949	-0.747134	-1.67846	0.0988459	0.253961	11.739	9.34455	15.9533	5.74212	3.08764	4.17001
NCLIV_006840	NCLIV_006840	hypothetical+protein	FR823382:2057633-2060927	-0.186243	-1.1378	0.408158	0.632293	46.2239	36.7954	62.8183	33.6282	18.0824	24.4212
NCLIV_006850	NCLIV_006850	unspecified+product	FR823382:2063989-2075424	0.149838	1.10944	0.160301	0.34968	962.865	766.465	1308.53	884.671	475.703	642.46
NCLIV_006860	NCLIV_006860	hypothetical+protein	FR823382:2079858-2085433	0.442179	1.35865	0.000333425	0.0023904	175.493	139.697	238.495	197.501	106.2	143.428
NCLIV_006870	NCLIV_006870	conserved+hypothetical+protein	FR823382:2088340-2088699	0.0738557	1.05253	0.747801	0.903331	39.7885	31.6727	54.0726	34.6867	18.6516	25.1899
NCLIV_006880	NCLIV_006880	conserved+hypothetical+protein	FR823382:2094082-2122673	0.648939	1.56801	1.91951e-06	2.5286e-05	123.399	98.229	167.7	160.308	86.2005	116.418
NCLIV_006890	NCLIV_006890	dead-box+helicase+family+protein,+related	FR823382:2127513-2135613	0.249655	1.18892	0.0880738	0.233251	107.363	85.464	145.907	105.734	56.8548	76.7853
NCLIV_006900	NCLIV_006900	conserved+hypothetical+protein	FR823382:2137695-2145934	-0.0387587	-1.02723	0.833148	0.960587	71.4065	56.8414	97.0413	57.5641	30.9532	41.8039
NCLIV_006910	NCLIV_006910	conserved+hypothetical+protein	FR823382:2147135-2148618	-1.1874	-2.27743	0.0130897	0.054615	12.3659	9.84357	16.8052	4.4271	2.38053	3.21502
NCLIV_006920	NCLIV_006920	conserved+hypothetical+protein	FR823382:2151551-2154828	-0.982147	-1.9754	1.67426e-05	0.000174347	58.1456	46.2854	79.0198	24.3152	13.0747	17.658
NCLIV_006930	NCLIV_006930	hypothetical+protein	FR823383:35472-36161	1.46936	2.76899	0.00985795	0.0434146	3.15689	2.51296	4.2902	7.45707	4.00979	5.41543
NCLIV_006940	NCLIV_006940	conserved+hypothetical+protein	FR823383:38118-39836	0.0291303	1.0204	0.849573	0.968202	99.0487	78.8453	134.607	83.7016	45.0078	60.7852
NCLIV_006950	NCLIV_006950	conserved+hypothetical+protein	FR823383:46533-56372	4.58346	23.9751	1.05346e-16	6.54552e-15	0.952505	0.758219	1.29445	21.7553	11.6982	15.799
NCLIV_006960	NCLIV_006960	putative+CDP-alcohol+phosphatidyltransferase+domain-containing+protein	FR823383:58959-63983	-0.233249	-1.17548	0.236765	0.452879	63.1559	50.2737	85.8288	44.4762	23.9156	32.2992
NCLIV_006970	NCLIV_006970	putative+bromodomain-containing+protein	FR823383:67617-83106	-0.000319352	-1.00022	0.998301	1	170.523	135.74	231.74	141.187	75.9187	102.532
NCLIV_006980	NCLIV_006980	hypothetical+protein	FR823383:88517-98334	0.323242	1.25114	0.00553639	0.0266503	302.087	240.469	410.536	313.03	168.322	227.327
NCLIV_006990	NCLIV_006990	conserved+hypothetical+protein	FR823383:102665-110447	-1.02564	-2.03586	3.87299e-05	0.000362776	53.2131	42.359	72.3165	21.5828	11.6054	15.6737
NCLIV_007000	NCLIV_007000	adp-ribosylation+factor+4,+related	FR823383:111745-114134	-0.258071	-1.19588	0.0262447	0.0943494	367.398	292.458	499.294	254.401	136.796	184.75
NCLIV_007010	NCLIV_007010	putative+cathepsin+C2+(TgCPC2)	FR823383:117044-121811	0.12542	1.09083	0.257805	0.480909	396.498	315.622	538.84	358.19	192.605	260.122
NCLIV_007020	NCLIV_007020	putative+zinc+finger+MYND+domain-containing+protein	FR823383:124465-128186	-0.867346	-1.8243	0.00145779	0.00861957	38.8627	30.9357	52.8144	17.5867	9.45666	12.7717
NCLIV_007030	NCLIV_007030	cytochrome+b5,+related	FR823383:129380-130801	-0.864365	-1.82054	0.00166706	0.00961297	37.2238	29.6311	50.5872	16.8762	9.0746	12.2557
NCLIV_007040	NCLIV_007040	conserved+hypothetical+protein	FR823383:133170-138107	-0.137844	-1.10026	0.465691	0.686883	86.0493	68.4974	116.941	64.7584	34.8217	47.0284
NCLIV_007050	NCLIV_007050	hypothetical+protein	FR823383:141502-143140	0.157508	1.11536	0.548758	0.763347	28.0845	22.356	38.1668	25.9564	13.9572	18.8499
NCLIV_007060	NCLIV_007060	putative+ubiquinone+biosynthesis+protein+COQ4	FR823383:149600-154089	0.107372	1.07726	0.666278	0.854891	32.2185	25.6467	43.7849	28.753	15.461	20.8809
NCLIV_007070	NCLIV_007070	putative+tubulin+epsilon+chain	FR823383:160428-163421	-1.3427	-2.53626	0.271052	0.497775	1.58478	1.26153	2.15372	0.44246	0.237918	0.321321
NCLIV_007080	NCLIV_007080	conserved+hypothetical+protein	FR823383:166774-168925	-0.213326	-1.15936	0.093687	0.245615	208.634	166.078	283.533	149.012	80.1261	108.214
NCLIV_007090	NCLIV_007090	conserved+hypothetical+protein	FR823383:171139-178015	-0.552551	-1.46668	0.0199584	0.0763129	45.99	36.6092	62.5004	25.929	13.9425	18.83
NCLIV_007100	NCLIV_007100	hypothetical+protein	FR823383:181553-187584	0.822498	1.76847	3.22467e-06	4.00052e-05	54.7862	43.6112	74.4544	80.3323	43.196	58.3384
NCLIV_007105	NCLIV_007105	unspecified+product	FR823383:191616-192131	0.179428	1.13244	0.113058	0.279961	371.365	295.616	504.685	348.288	187.28	252.932
NCLIV_007110	NCLIV_007110	hypothetical+protein	FR823383:195587-197555	-0.0203357	-1.0142	0.826439	0.956525	1302.38	1036.73	1769.93	1063.46	571.839	772.296
NCLIV_007120	NCLIV_007120	hypothetical+protein	FR823383:200691-208016	-0.40899	-1.32776	0.0044174	0.0222241	142.954	113.795	194.274	89.1319	47.9277	64.7288
NCLIV_007130	NCLIV_007130	fibrillin-like+protein,+related	FR823383:210923-212305	0.55029	1.46438	0.715134	0.880067	0.317124	0.252439	0.430971	0.441952	0.237645	0.320951
NCLIV_007140	NCLIV_007140	unspecified+product	FR823383:212979-215914	-0.219279	-1.16415	0.84263	0.964859	1.26935	1.01043	1.72504	0.885412	0.476101	0.642998
NCLIV_007150	NCLIV_007150	putative+F-box+domain-containing+protein	FR823383:217560-219524	-0.565195	-1.47959	0.0851267	0.227004	22.1319	17.6176	30.0772	12.3474	6.63943	8.96688
NCLIV_007160	NCLIV_007160	conserved+hypothetical+protein	FR823383:222771-223460	0.166562	1.12238	0.614322	0.817634	16.1557	12.8604	21.9556	15.0315	8.08271	10.9161
NCLIV_007170	NCLIV_007170	conserved+hypothetical+protein	FR823383:227138-228698	-4.17126	-18.0166	0.00657918	0.0310274	2.53724	2.01971	3.44811	0	0	0
NCLIV_007180	NCLIV_007180	hypothetical+protein	FR823383:230166-231733	-0.0647059	-1.04587	0.651203	0.843577	127.891	101.804	173.803	101.262	54.45	73.5375
NCLIV_007190	NCLIV_007190	conserved+hypothetical+protein	FR823383:233979-241935	-0.164947	-1.12113	0.519063	0.738575	33.817	26.9192	45.9573	24.9669	13.4251	18.1313
NCLIV_007200	NCLIV_007200	conserved+hypothetical+protein	FR823383:243264-244915	-2.39306	-5.25272	0.172671	0.36411	0.634079	0.504743	0.861712	0	0	0
NCLIV_007210	NCLIV_007210	conserved+hypothetical+protein	FR823383:246412-247048	0	1	1	1	0	0	0	0	0	0
NCLIV_007220	NCLIV_007220	hypothetical+protein	FR823383:248610-257079	-0.635871	-1.55388	2.13891e-05	0.000216681	137.569	109.508	186.956	73.2738	39.4006	53.2124
NCLIV_007230	NCLIV_007230	hypothetical+protein	FR823383:261924-263720	0.203521	1.15151	0.175777	0.367318	104.033	82.8128	141.381	99.2258	53.3554	72.0592
NCLIV_007240	NCLIV_007240	conserved+hypothetical+protein	FR823383:266724-270629	-0.071135	-1.05054	0.705828	0.880067	75.6825	60.2453	102.853	59.6536	32.0768	43.3213
NCLIV_007250	NCLIV_007250	conserved+hypothetical+protein	FR823383:274036-275334	-0.201824	-1.15015	0.885682	0.991316	0.63458	0.505142	0.862394	0.441081	0.237177	0.320319
NCLIV_007260	NCLIV_007260	putative+p97+protein	FR823383:278398-280941	-0.382499	-1.3036	0.00673336	0.0316544	204.376	162.688	277.747	129.805	69.7983	94.2661
NCLIV_007270	NCLIV_007270	putative+ppg3	FR823383:283031-285035	0.2728	1.20815	0.0155134	0.0623882	318.523	253.553	432.873	318.715	171.378	231.455
NCLIV_007280	NCLIV_007280	hypothetical+protein	FR823383:287604-299198	0.1761	1.12983	0.230635	0.444804	127.832	101.758	173.724	119.625	64.3243	86.8732
NCLIV_007290	NCLIV_007290	putative+protein+kinase	FR823383:302837-308795	-1.15726	-2.23033	4.90449e-11	1.54949e-09	121.616	96.8091	165.276	45.0889	24.245	32.7441
NCLIV_007300	NCLIV_007300	loc100127341+protein,+related	FR823383:315878-323690	0	1	1	1	0	0	0	0	0	0
NCLIV_007310	NCLIV_007310	putative+zinc+finger+DHHC+domain-containing+protein	FR823383:329236-332248	-0.0202446	-1.01413	0.876296	0.985767	249.63	198.712	339.247	203.846	109.611	148.035
NCLIV_007320	NCLIV_007320	pentatricopeptide+repeat-containing+protein+At5g55840,+related	FR823383:336373-343997	0.177243	1.13072	0.0793878	0.215315	957.281	762.021	1300.94	896.411	482.016	650.986
NCLIV_007330	NCLIV_007330	similar+to+uniprot|P15705+Saccharomyces+cerevisiae+YOR027w+STI1,+related	FR823383:349362-355355	0.115952	1.08369	0.329303	0.555356	269.124	214.229	365.739	241.535	129.877	175.406
NCLIV_007340	NCLIV_007340	conserved+hypothetical+protein	FR823383:358370-360705	-1.15633	-2.2289	0.000327434	0.00235424	34.7966	27.699	47.2886	12.8604	6.91523	9.33936
NCLIV_007350	NCLIV_007350	putative+ATPase+domain-containing+cell+division+control+protein	FR823383:363262-369063	0.27536	1.2103	0.112635	0.279376	71.8746	57.2141	97.6776	72.067	38.7516	52.336
NCLIV_007360	NCLIV_007360	conserved+hypothetical+protein	FR823383:393525-394484	-3.98585	-15.8439	0.0110967	0.0478118	2.21368	1.76214	3.00838	0	0	0
NCLIV_007370	NCLIV_007370	ribosomal+protein+L1,+related	FR823383:397744-401172	-0.408834	-1.32761	0.263099	0.487976	17.027	13.5539	23.1397	10.5904	5.69464	7.69089
NCLIV_007380	NCLIV_007380	conserved+hypothetical+protein	FR823383:402438-407636	-0.272999	-1.20832	0.291975	0.522078	34.8412	27.7345	47.3491	23.857	12.8283	17.3252
NCLIV_007390	NCLIV_007390	mgc78841+protein,+related	FR823383:411096-417487	0.0889324	1.06358	0.523429	0.742009	131.855	104.96	179.19	116.145	62.4533	84.3463
NCLIV_007400	NCLIV_007400	conserved+hypothetical+protein	FR823383:420324-424270	0	1	1	1	0	0	0	0	0	0
NCLIV_007410	NCLIV_007410	putative+DNA+polymerase+epsilon+p17+subunit	FR823383:427488-427889	-0.381455	-1.30266	0.0549022	0.162961	68.8662	54.8193	93.5892	43.7516	23.526	31.773
NCLIV_007420	NCLIV_007420	putative+nuclear+DNA-binding+protein	FR823383:429412-431235	0.247776	1.18738	0.221828	0.432357	55.5406	44.2117	75.4796	54.6362	29.3788	39.6776
NCLIV_007430	NCLIV_007430	mboat+domain-containing+protein,+related	FR823383:435844-439543	0.278984	1.21334	0.293629	0.523905	24.9882	19.8912	33.9589	25.1348	13.5154	18.2533
NCLIV_007440	NCLIV_007440	conserved+hypothetical+protein	FR823383:442671-443270	0.351097	1.27553	0.256052	0.478838	18.3526	14.6091	24.9411	19.4201	10.4425	14.1031
NCLIV_007450	NCLIV_007450	unspecified+product	FR823383:447651-449309	-0.116705	-1.08426	0.248529	0.468493	803.094	639.284	1091.4	613.384	329.827	445.448
NCLIV_007460	NCLIV_007460	unspecified+product	FR823383:451388-458186	-0.0247469	-1.0173	0.91127	1	43.0373	34.2588	58.4877	35.0322	18.8374	25.4409
NCLIV_007470	NCLIV_007470	conserved+hypothetical+protein	FR823383:461938-469509	-0.110109	-1.07931	0.581655	0.794872	71.7223	57.0928	97.4706	55.0241	29.5874	39.9592
NCLIV_007480	NCLIV_007480	conserved+hypothetical+protein	FR823383:471922-472742	-0.599376	-1.51506	0.00576196	0.02761	66.7702	53.1508	90.7407	36.4571	19.6036	26.4756
NCLIV_007490	NCLIV_007490	putative+HIT+zinc+finger+domain-containing+protein	FR823383:482789-486710	0.122137	1.08835	0.632775	0.831928	29.8538	23.7644	40.5713	26.9186	14.4746	19.5486
NCLIV_007500	NCLIV_007500	conserved+hypothetical+protein	FR823383:488703-495022	-0.355575	-1.2795	0.161031	0.350248	36.3827	28.9616	49.4441	23.5207	12.6475	17.0811
NCLIV_007510	NCLIV_007510	conserved+hypothetical+protein	FR823383:498304-501255	-0.0276547	-1.01935	0.853831	0.972379	115.957	92.3052	157.586	94.2045	50.6554	68.4126
NCLIV_007520	NCLIV_007520	hypothetical+protein	FR823383:503662-504729	-0.608132	-1.52428	0.0170711	0.0673805	39.3324	31.3096	53.4527	21.3261	11.4674	15.4873
NCLIV_007530	NCLIV_007530	uvrd-like+DNA+helicase,+C+terminal,+related	FR823383:507471-511278	-0.500083	-1.4143	0.241788	0.458605	12.8818	10.2542	17.5063	7.50618	4.0362	5.45109
NCLIV_007540	NCLIV_007540	conserved+hypothetical+protein	FR823383:511897-520758	0.142948	1.10416	0.312495	0.544257	135.87	108.156	184.647	124.252	66.8124	90.2335
NCLIV_007550	NCLIV_007550	hypothetical+protein	FR823383:528277-530800	-0.0646976	-1.04587	0.817452	0.95055	25.7122	20.4676	34.9428	20.3541	10.9447	14.7814
NCLIV_007560	NCLIV_007560	putative+ELMO/CED-12+family+domain-containing+protein	FR823383:534059-536589	-0.560018	-1.47429	0.290029	0.520697	7.9326	6.31456	10.7804	4.4163	2.37472	3.20718
NCLIV_007570	NCLIV_007570	conserved+hypothetical+protein	FR823383:541414-546705	-1.14125	-2.20572	0.0367118	0.122581	9.60127	7.64286	13.0481	3.53766	1.90226	2.5691
NCLIV_007580	NCLIV_007580	hypothetical+protein	FR823383:550597-561060	0.582728	1.49768	2.06746e-05	0.000210105	118.284	94.157	160.748	146.768	78.9199	106.585
NCLIV_007590	NCLIV_007590	putative+actin-like+family+protein+ARP4a	FR823383:564317-567752	0.0840193	1.05997	0.673514	0.859002	59.4757	47.3442	80.8274	52.2137	28.0762	37.9183
NCLIV_007600	NCLIV_007600	conserved+hypothetical+protein	FR823383:569570-571834	-0.0006805	-1.00047	0.998204	1	24.5087	19.5096	33.3073	20.2877	10.909	14.7332
NCLIV_007610	NCLIV_007610	gf17261,+related	FR823383:574725-579943	0.253172	1.19182	0.258238	0.481596	37.9865	30.2382	51.6236	37.5162	20.1731	27.2448
NCLIV_007620	NCLIV_007620	putative+replication+protein+A2	FR823383:586047-588662	-0.547908	-1.46196	0.0447415	0.142378	34.9526	27.8232	47.5005	19.7604	10.6255	14.3502
NCLIV_007630	NCLIV_007630	putative+ATP-dependent+RNA+helicase	FR823383:589008-596604	0.08132	1.05799	0.642911	0.838326	85.4311	68.0053	116.101	74.8585	40.2527	54.3632
NCLIV_007640	NCLIV_007640	conserved+hypothetical+protein	FR823383:598221-599759	0.254409	1.19285	0.0800515	0.216393	112.018	89.1695	152.233	110.68	59.5147	80.3775
NCLIV_007650	NCLIV_007650	hypothetical+protein	FR823383:605197-608675	0	1	1	1	0	0	0	0	0	0
NCLIV_007660	NCLIV_007660	hypothetical+protein	FR823383:612337-619732	1.10503	2.15104	0.00289801	0.0155698	8.86483	7.05663	12.0473	15.9331	8.5675	11.5708
NCLIV_007670	NCLIV_007670	hypothetical+protein	FR823383:622528-626150	-0.0925868	-1.06628	0.517076	0.73645	145.849	116.099	198.208	113.267	60.9058	82.2563
NCLIV_007680	NCLIV_007680	conserved+hypothetical+protein	FR823383:632367-637516	-0.615282	-1.53186	0.0116784	0.0499278	47.8325	38.0759	65.0043	25.8155	13.8814	18.7475
NCLIV_007690	NCLIV_007690	putative+oxidoreductase	FR823383:641924-651117	2.8471	7.19554	0.0084941	0.0383366	0.316583	0.252008	0.430236	2.6505	1.42522	1.92483
NCLIV_007700	NCLIV_007700	conserved+hypothetical+protein	FR823383:652803-656531	0.137262	1.09982	0.539801	0.755681	44.1459	35.1413	59.9942	40.2189	21.6264	29.2075
NCLIV_007710	NCLIV_007710	f14o23.7+protein,+related	FR823383:660050-672311	0.178613	1.1318	0.162866	0.353275	200.167	159.338	272.027	187.632	100.893	136.261
NCLIV_007720	NCLIV_007720	conserved+hypothetical+protein	FR823383:675258-676118	-0.841544	-1.79197	5.41984e-18	3.8123e-16	1361.84	1084.06	1850.74	629.306	338.389	457.011
NCLIV_007730	NCLIV_007730	valyl-tRNAsynthetase,+mitochondrial,+related	FR823383:679939-689955	0.0179196	1.0125	0.893948	0.994507	199.209	158.576	270.725	167.037	89.8187	121.305
NCLIV_007740	NCLIV_007740	hypothetical+protein	FR823383:692057-694347	-4.16323	-17.9167	0.00677898	0.0318288	2.52313	2.00847	3.42893	0	0	0
NCLIV_007750	NCLIV_007750	conserved+hypothetical+protein	FR823383:697816-702097	-0.547488	-1.46154	0.0451106	0.1434	34.6796	27.6058	47.1295	19.6099	10.5446	14.241
NCLIV_007760	NCLIV_007760	conserved+hypothetical+protein	FR823383:704190-707479	-0.271254	-1.20686	0.317604	0.54956	29.7687	23.6967	40.4557	20.4055	10.9724	14.8188
NCLIV_007770	NCLIV_007770	putative+Rhoptry+kinase+family+protein,+truncated+(incomplete+catalytic+triad)	FR823383:709065-710644	-2.24789	-4.74988	6.82815e-107	4.62824e-104	1630.19	1297.67	2215.42	284.125	152.779	206.336
NCLIV_007780	NCLIV_007780	conserved+hypothetical+protein	FR823383:713560-720841	-0.775078	-1.71128	0.00765405	0.0350759	36.1144	28.748	49.0795	17.4235	9.3689	12.6532
NCLIV_007790	NCLIV_007790	conserved+hypothetical+protein	FR823383:722593-725964	0.0711543	1.05056	0.670275	0.856334	84.968	67.6367	115.471	73.9288	39.7528	53.6881
NCLIV_007800	NCLIV_007800	unspecified+product	FR823383:730163-750795	0.243715	1.18404	0.0234012	0.0864614	495.953	394.792	674	486.329	261.508	353.179
NCLIV_007810	NCLIV_007810	unspecified+product	FR823383:757131-762254	-0.0773677	-1.05509	0.615735	0.819004	134.33	106.93	182.554	105.428	56.6906	76.5634
NCLIV_007820	NCLIV_007820	hypothetical+protein	FR823383:763725-766917	3.02824	8.15811	0.047416	0.146929	0	0	0	0.883848	0.47526	0.641862
NCLIV_007830	NCLIV_007830	conserved+hypothetical+protein	FR823383:770612-776584	-0.0403355	-1.02835	0.832876	0.960587	62.5755	49.8117	85.0401	50.3893	27.0952	36.5934
NCLIV_007840	NCLIV_007840	conserved+hypothetical+protein	FR823383:779420-782324	-0.661087	-1.58127	0.0563922	0.166519	20.3344	16.1867	27.6344	10.6042	5.70208	7.70094
NCLIV_007850	NCLIV_007850	hypothetical+protein	FR823383:784005-787363	0.0407827	1.02867	0.845242	0.966474	49.5657	39.4556	67.3598	42.2286	22.707	30.667
NCLIV_007860	NCLIV_007860	hypothetical+protein	FR823383:790765-797180	0.00257486	1.00179	0.98042	1	479.256	381.5	651.309	397.601	213.797	288.743
NCLIV_007870	NCLIV_007870	hypothetical+protein	FR823383:799950-805685	0.552257	1.46638	0.714428	0.880067	0.317124	0.252439	0.430971	0.442555	0.23797	0.32139
NCLIV_007880	NCLIV_007880	gm10776,+related	FR823383:809467-820312	0.155311	1.11366	0.125286	0.300557	536.903	427.389	729.652	495.184	266.269	359.61
NCLIV_007890	NCLIV_007890	conserved+hypothetical+protein	FR823383:821094-821901	0	1	1	1	0	0	0	0	0	0
NCLIV_007900	NCLIV_007900	pv1h14125_P,+related	FR823383:822629-824874	0.238527	1.17979	0.0506591	0.154169	301.746	240.197	410.072	294.838	158.54	214.115
NCLIV_007905	NCLIV_007905	unspecified+product	FR823383:826492-827923	-1.64226	-3.12154	0.334808	0.555356	0.316536	0.25197	0.430172	0	0	0
NCLIV_007910	NCLIV_007910	conserved+hypothetical+protein	FR823383:831149-837976	0.161857	1.11873	0.310528	0.54197	89.6924	71.3975	121.892	83.1122	44.6908	60.3572
NCLIV_007920	NCLIV_007920	hypothetical+protein	FR823383:840201-846103	-2.88002	-7.36161	0.0954827	0.24771	0.948878	0.755331	1.28952	0	0	0
NCLIV_007930	NCLIV_007930	hypothetical+protein	FR823383:850215-854968	0.346045	1.27107	0.219837	0.429421	24.4335	19.4497	33.2051	25.7525	13.8476	18.7018
NCLIV_007940	NCLIV_007940	conserved+hypothetical+protein	FR823383:857374-861054	-0.299423	-1.23065	0.296933	0.52826	27.0484	21.5312	36.7588	18.1784	9.77485	13.2014
NCLIV_007950	NCLIV_007950	putative+rpp14+family+domain-containing+protein	FR823383:862276-863615	-0.361747	-1.28498	0.124115	0.298324	41.7971	33.2716	56.8022	26.91	14.4699	19.5424
NCLIV_007960	NCLIV_007960	conserved+hypothetical+protein	FR823383:865356-867625	-2.00801	-4.02226	5.36624e-08	9.87918e-07	32.6273	25.9721	44.3404	6.62505	3.5624	4.8112
NCLIV_007970	NCLIV_007970	putative+WD+domain,+G-beta+repeat-containing+protein	FR823383:870241-872080	-0.530548	-1.44448	0.620192	0.822509	1.59921	1.27302	2.17333	0.880067	0.473227	0.639117
NCLIV_007980	NCLIV_007980	conserved+hypothetical+protein	FR823383:875020-881168	0.250935	1.18998	0.0719554	0.201313	123.663	98.4392	168.058	121.89	65.5424	88.5183
NCLIV_007990	NCLIV_007990	conserved+hypothetical+protein	FR823383:883449-885711	-0.0602704	-1.04266	0.72266	0.884528	82.2576	65.4792	111.788	65.3279	35.1279	47.442
NCLIV_008000	NCLIV_008000	putative+CMGC+kinase,+CDK+family	FR823383:891784-896055	-0.686316	-1.60917	0.603904	0.811667	0.949874	0.756124	1.29088	0.441952	0.237645	0.320951
NCLIV_008010	NCLIV_008010	conserved+hypothetical+protein	FR823383:898672-906709	-0.127491	-1.09239	0.571275	0.78327	44.9904	35.8135	61.1419	34.097	18.3345	24.7617
NCLIV_008020	NCLIV_008020	conserved+hypothetical+protein	FR823383:908355-920737	0.0909465	1.06507	0.550324	0.76467	100.644	80.1149	136.775	88.7791	47.7381	64.4726
NCLIV_008030	NCLIV_008030	conserved+hypothetical+protein	FR823383:924728-927046	0.583678	1.49866	5.18873e-08	9.64768e-07	334.637	266.38	454.772	415.383	223.358	301.657
NCLIV_008040	NCLIV_008040	hypothetical+protein	FR823383:930137-933845	-0.620597	-1.53751	0.0276194	0.0982024	33.8811	26.9702	46.0444	18.2049	9.78907	13.2206
NCLIV_008050	NCLIV_008050	conserved+hypothetical+protein	FR823383:940223-940693	0.547449	1.4615	0.716156	0.880067	0.317124	0.252439	0.430971	0.441081	0.237177	0.320319
NCLIV_008060	NCLIV_008060	conserved+hypothetical+protein	FR823383:942714-945372	-1.05096	-2.07191	0.406443	0.630422	1.2659	1.00769	1.72036	0.441944	0.237641	0.320946
NCLIV_008065	NCLIV_008065	unspecified+product	FR823383:946767-948170	0.0258683	1.01809	0.883682	0.990786	85.0467	67.6994	115.578	71.7076	38.5584	52.075
NCLIV_008070	NCLIV_008070	conserved+hypothetical+protein	FR823383:949245-950084	0.284004	1.21757	0.000990489	0.00619059	1543.09	1228.34	2097.06	1555.96	836.665	1129.96
NCLIV_008080	NCLIV_008080	hypothetical+protein	FR823383:957796-964771	0.110153	1.07934	0.371199	0.594302	237.326	188.918	322.526	212.144	114.073	154.062
NCLIV_008090	NCLIV_008090	conserved+hypothetical+protein	FR823383:972288-975946	0	1	1	1	0	0	0	0	0	0
NCLIV_008100	NCLIV_008100	putative+IMPortin-alpha+re-exporter	FR823383:978164-987177	-0.295073	-1.22695	0.0639297	0.183897	109.295	87.0014	148.531	73.7462	39.6546	53.5555
NCLIV_008110	NCLIV_008110	conserved+hypothetical+protein	FR823383:992525-997243	-0.0492396	-1.03472	0.872035	0.983645	21.9661	17.4856	29.8519	17.5775	9.45172	12.765
NCLIV_008120	NCLIV_008120	conserved+hypothetical+protein	FR823383:998507-1026568	0.444349	1.3607	0.000241034	0.00180437	288.431	229.598	391.977	325.064	174.793	236.066
NCLIV_008130	NCLIV_008130	GTP+cyclohydrolase,+related	FR823383:1041859-1045279	-0.114716	-1.08276	0.445287	0.666583	137.747	109.65	187.199	105.345	56.646	76.5032
NCLIV_008140	NCLIV_008140	zinc+finger+(CCCH+type)+protein,+related	FR823383:1050088-1054435	-0.0517442	-1.03652	0.673974	0.859169	278.999	222.09	379.16	222.907	119.861	161.878
NCLIV_008150	NCLIV_008150	putative+ribosomal+protein+L15	FR823383:1059303-1063394	-0.144049	-1.105	0.617503	0.820404	25.8232	20.556	35.0938	19.3425	10.4008	14.0468
NCLIV_008160	NCLIV_008160	conserved+hypothetical+protein	FR823383:1064157-1071615	0.307974	1.23797	0.0256519	0.0925306	146.019	116.235	198.44	149.73	80.5124	108.736
NCLIV_008170	NCLIV_008170	hypothetical+protein	FR823383:1075112-1076979	0.636831	1.55491	2.50685e-09	5.95256e-08	368.171	293.074	500.344	474.158	254.963	344.34
NCLIV_008175	NCLIV_008175	unspecified+product	FR823383:1078412-1079718	0.0817551	1.0583	0.705226	0.880067	46.0494	36.6565	62.5811	40.3652	21.7051	29.3138
NCLIV_008180	NCLIV_008180	conserved+hypothetical+protein	FR823383:1082169-1083965	0.162139	1.11894	0.357047	0.578451	68.9322	54.8718	93.6788	63.8904	34.3549	46.3981
NCLIV_008190	NCLIV_008190	hypothetical+protein	FR823383:1086364-1096122	0.555459	1.46964	0.00216885	0.0121404	60.169	47.8961	81.7696	73.2889	39.4087	53.2234
NCLIV_008200	NCLIV_008200	conserved+hypothetical+protein	FR823383:1099219-1114333	-0.955315	-1.939	0.00649877	0.0306676	21.8224	17.3712	29.6566	9.26056	4.97956	6.72514
NCLIV_008210	NCLIV_008210	putative+GNS1/SUR4+family+domain-containing+protein	FR823383:1119920-1122085	-0.516608	-1.43059	0.00501921	0.0246165	101.578	80.8588	138.045	58.7632	31.598	42.6746
NCLIV_008220	NCLIV_008220	putative+M16+family+peptidase	FR823383:1126755-1134940	-1.50369	-2.83567	4.22936e-07	6.34489e-06	47.1398	37.5245	64.063	13.6865	7.35947	9.93933
NCLIV_008230	NCLIV_008230	delta-aminolevulinic+acid+dehydratase,+related	FR823383:1138306-1144066	-1.6423	-3.12162	8.29016e-12	2.90195e-10	72.1919	57.4666	98.1087	19.0676	10.253	13.8471
NCLIV_008240	NCLIV_008240	conserved+hypothetical+protein	FR823383:1148835-1151552	-0.151918	-1.11105	0.326369	0.555356	106.976	85.1558	145.381	79.7243	42.8691	57.8969
NCLIV_008245	NCLIV_008245	hypothetical+protein	FR823383:1180865-1201008	1.64182	3.12059	5.07157e-27	6.00216e-25	59.1579	47.0912	80.3955	153.143	82.3476	111.215
NCLIV_008255	NCLIV_008255	hypothetical+protein	FR823383:1158839-1180468	1.42395	2.6832	0.0447327	0.142378	1.9031	1.51492	2.58631	4.43639	2.38552	3.22177
NCLIV_008260	NCLIV_008260	putative+CAM+kinase+(incomplete+catalytic+triad)	FR823383:1204281-1210044	-0.193271	-1.14335	0.473676	0.69304	29.7969	23.7191	40.494	21.5671	11.597	15.6623
NCLIV_008270	NCLIV_008270	putative+XAP5+protein	FR823383:1214870-1218493	-0.0751592	-1.05348	0.716235	0.880067	55.2755	44.0007	75.1194	43.4458	23.3616	31.5509
NCLIV_008280	NCLIV_008280	putative+short+chain+dehydrogenase+domain-containing+protein	FR823383:1222823-1225851	-0.220912	-1.16547	0.541586	0.7569	18.2794	14.5509	24.8417	12.9695	6.97393	9.41863
NCLIV_008290	NCLIV_008290	conserved+hypothetical+protein	FR823383:1227014-1228609	0.12626	1.09146	0.734986	0.894119	13.2701	10.5634	18.0341	12.0048	6.45521	8.71808
NCLIV_008300	NCLIV_008300	conserved+hypothetical+protein	FR823383:1231210-1240609	0.196757	1.14612	0.16734	0.359986	122.911	97.8406	167.037	116.679	62.7404	84.7341
NCLIV_008310	NCLIV_008310	conserved+hypothetical+protein	FR823383:1243781-1245415	0.973442	1.96352	1.94651e-10	5.66922e-09	81.654	64.9987	110.968	132.893	71.459	96.5089
NCLIV_008320	NCLIV_008320	protein+F23B2.12,+partially+confirmed+by+transcript+evidence,+related	FR823383:1248704-1255202	0.572666	1.48727	4.14833e-06	5.02109e-05	164.13	130.652	223.053	202.214	108.734	146.851
NCLIV_008330	NCLIV_008330	putative+dynein+intermediate+chain	FR823383:1256285-1266179	-0.231896	-1.17438	0.760126	0.912596	3.15701	2.51306	4.29037	2.20756	1.18704	1.60316
NCLIV_008340	NCLIV_008340	agap004885-PA,+related	FR823383:1269789-1271144	-0.0942001	-1.06747	0.551511	0.765671	106.258	84.5843	144.405	82.4262	44.322	59.859
NCLIV_008350	NCLIV_008350	agap001401-PA,+related	FR823383:1273218-1275874	0.0941849	1.06746	0.698486	0.876693	36.699	29.2134	49.874	32.4506	17.4493	23.5661
NCLIV_008360	NCLIV_008360	putative+SRS14	FR823383:1278152-1279033	1.90603	3.74775	0.127317	0.302985	0.317124	0.252439	0.430971	1.3239	0.711886	0.961437
NCLIV_008370	NCLIV_008370	conserved+hypothetical+protein	FR823383:1286609-1287328	0.0630794	1.04469	0.63549	0.833236	178.585	142.159	242.697	154.508	83.0817	112.206
NCLIV_008380	NCLIV_008380	putative+zinc+transporter+ZIP+domain-containing+protein	FR823383:1290461-1291945	-0.216151	-1.16163	0.369614	0.592399	40.5022	32.2408	55.0425	28.8583	15.5176	20.9573
NCLIV_008390	NCLIV_008390	conserved+hypothetical+protein	FR823383:1294743-1296758	-0.171874	-1.12652	0.456691	0.678574	43.0297	34.2528	58.4774	31.6198	17.0025	22.9627
NCLIV_008400	NCLIV_008400	tryptophanyl-tRNAsynthetase,related	FR823383:1301516-1306221	0.0949385	1.06802	0.662864	0.853359	43.6498	34.7464	59.32	38.6147	20.7638	28.0425
NCLIV_008410	NCLIV_008410	gamma-aminobutyric+acid+receptor-associated+protein-like+1,+related	FR823383:1309163-1310941	0.180047	1.13292	0.113405	0.280541	396.295	315.461	538.564	371.827	199.938	270.026
NCLIV_008420	NCLIV_008420	conserved+hypothetical+protein	FR823383:1313029-1318258	0.514319	1.42832	0.0758808	0.208309	18.999	15.1237	25.8197	22.5258	12.1125	16.3585
NCLIV_008425	NCLIV_008425	unspecified+product	FR823383:1320068-1321480	-0.231382	-1.17396	0.362481	0.584738	35.0479	27.899	47.6301	24.706	13.2848	17.9418
NCLIV_008430	NCLIV_008430	conserved+hypothetical+protein	FR823383:1323483-1326334	0.48137	1.39607	0.000352957	0.00251592	142.524	113.453	193.69	164.827	88.6305	119.7
NCLIV_008440	NCLIV_008440	conserved+hypothetical+protein	FR823383:1334230-1336513	0.965364	1.95256	0.0985953	0.253579	3.48397	2.77333	4.73471	5.75083	3.09232	4.17633
NCLIV_008450	NCLIV_008450	putative+radial+spoke+3+protein	FR823383:1352109-1357175	-0.249607	-1.18888	0.793471	0.934101	1.92582	1.53301	2.61719	1.32327	0.711545	0.960976
NCLIV_008460	NCLIV_008460	putative+protein+kinase	FR823383:1362857-1364686	0	1	1	1	0	0	0	0	0	0
NCLIV_008470	NCLIV_008470	putative+glycyl-tRNAsynthetase	FR823383:1366826-1375520	-0.519454	-1.43341	0.0347235	0.117149	43.2163	34.4013	58.7309	24.9294	13.4049	18.104
NCLIV_008480	NCLIV_008480	conserved+hypothetical+protein	FR823383:1376079-1381685	-0.125565	-1.09093	0.429959	0.652907	98.2088	78.1768	133.466	74.541	40.0819	54.1327
NCLIV_008490	NCLIV_008490	rna+recognition+motif.+family+protein,+related	FR823383:1383535-1389415	0.332361	1.25907	0.131391	0.310509	38.8846	30.9531	52.8442	40.5764	21.8186	29.4671
NCLIV_008500	NCLIV_008500	conserved+hypothetical+protein	FR823383:1390729-1396675	-0.0706311	-1.05018	0.780297	0.924395	33.4457	26.6236	45.4527	26.3695	14.1793	19.1499
NCLIV_008510	NCLIV_008510	putative+MSF1-like+conserved+region+domain-containing+protein	FR823383:1399371-1402672	0.474179	1.38913	0.0335392	0.113771	34.8701	27.7575	47.3884	40.1625	21.5961	29.1666
NCLIV_008520	NCLIV_008520	hypothetical+protein	FR823383:1405309-1406070	-0.461231	-1.37672	0.29603	0.526904	11.0948	8.83177	15.0779	6.63989	3.57038	4.82198
NCLIV_008530	NCLIV_008530	predicted+CDS+Pa_1_14030,+related	FR823383:1411184-1415243	0.142886	1.10411	0.428801	0.651945	68.2092	54.2963	92.6962	62.3817	33.5437	45.3025
NCLIV_008540	NCLIV_008540	conserved+hypothetical+protein	FR823383:1417049-1418618	0.0581767	1.04115	0.802301	0.940756	37.7529	30.0523	51.3062	32.5569	17.5064	23.6432
NCLIV_008550	NCLIV_008550	conserved+hypothetical+protein	FR823383:1420055-1421684	-0.313302	-1.24255	0.340334	0.560657	19.9528	15.8829	27.1158	13.2739	7.1376	9.63969
NCLIV_008560	NCLIV_008560	conserved+hypothetical+protein	FR823383:1425324-1430873	-0.0933122	-1.06682	0.599131	0.810415	82.3535	65.5555	111.918	63.9204	34.3711	46.4199
NCLIV_008570	NCLIV_008570	conserved+hypothetical+protein	FR823383:1433602-1444203	-0.0580901	-1.04109	0.652281	0.844488	180.977	144.062	245.947	143.955	77.4071	104.542
NCLIV_008580	NCLIV_008580	hypothetical+protein	FR823383:1447302-1453946	0	1	1	1	0	0	0	0	0	0
NCLIV_008590	NCLIV_008590	conserved+hypothetical+protein	FR823383:1454931-1455572	0	1	1	1	0	0	0	0	0	0
NCLIV_008600	NCLIV_008600	conserved+hypothetical+protein	FR823383:1456875-1458464	0	1	1	1	0	0	0	0	0	0
NCLIV_008610	NCLIV_008610	putative+lipase+domain-containing+protein	FR823383:1461195-1467654	1.61134	3.05534	0.0766006	0.209437	0.949213	0.755598	1.28998	2.65471	1.42748	1.92789
NCLIV_008620	NCLIV_008620	conserved+hypothetical+protein	FR823383:1469107-1470937	0.682066	1.60444	8.59991e-05	0.000740427	64.0126	50.9556	86.993	85.129	45.7753	61.8218
NCLIV_008630	NCLIV_008630	hypothetical+protein	FR823383:1472569-1490044	0.689441	1.61266	0.468225	0.68731	1.26355	1.00582	1.71716	1.76275	0.947863	1.28014
NCLIV_008640	NCLIV_008640	unspecified+product	FR823383:1492376-1493821	-2.88002	-7.36161	0.0954827	0.24771	0.948878	0.755331	1.28952	0	0	0
NCLIV_008650	NCLIV_008650	hypothetical+protein	FR823383:1498697-1501217	-0.229789	-1.17266	0.18831	0.385514	84.1629	66.9958	114.377	59.4181	31.9501	43.1502
NCLIV_008660	NCLIV_008660	putative+adenylate+and+guanylate+cyclase+catalytic+domain-containing+protein	FR823383:1504180-1538971	0.313816	1.24299	0.00465074	0.0231791	410.255	326.574	557.537	422.336	227.098	306.706
NCLIV_008670	NCLIV_008670	putative+ribosomal+protein+L11	FR823383:1543117-1545362	0.165643	1.12167	0.582785	0.795589	20.388	16.2294	27.7073	18.9542	10.192	13.7648
NCLIV_008680	NCLIV_008680	conserved+hypothetical+protein	FR823383:1547094-1552567	0.265154	1.20176	0.087196	0.231364	90.2658	71.8539	122.671	89.8601	48.3193	65.2576
NCLIV_008690	NCLIV_008690	ribosomal+protein+L2,+related	FR823383:1555875-1558186	0.288002	1.22095	0.0829165	0.222303	74.6013	59.3845	101.383	75.4582	40.5752	54.7988
NCLIV_008700	NCLIV_008700	protein+phosphatase+2C,+related	FR823383:1560327-1565651	0.0942749	1.06753	0.686728	0.868427	44.3895	35.3352	60.3253	39.2501	21.1054	28.5039
NCLIV_008710	NCLIV_008710	putative+patatin-like+phospholipase+domain-containing+protein	FR823383:1568008-1574999	-0.0957932	-1.06865	0.705956	0.880067	32.6352	25.9784	44.3512	25.2819	13.5945	18.3601
NCLIV_008720	NCLIV_008720	unspecified+product	FR823383:1577451-1579952	0	1	1	1	0	0	0	0	0	0
NCLIV_008730	NCLIV_008730	hypothetical+protein	FR823383:1581656-1584506	-0.359059	-1.28259	0.000137994	0.00112323	1143.62	910.353	1554.18	738.387	397.043	536.226
NCLIV_008740	NCLIV_008740	probable+translation+factor+pelota,+related	FR823383:1589716-1596169	0.0903495	1.06463	0.605953	0.811667	75.9251	60.4384	103.182	66.9488	35.9995	48.6191
NCLIV_008750	NCLIV_008750	conserved+hypothetical+protein	FR823383:1596557-1597568	0.398908	1.31851	0.0921262	0.242034	33.7016	26.8273	45.8004	36.8396	19.8093	26.7534
NCLIV_008760	NCLIV_008760	conserved+hypothetical+protein	FR823383:1599945-1604125	0.443143	1.35956	2.55917e-05	0.000252429	509.14	405.289	691.922	573.291	308.269	416.332
NCLIV_008770	NCLIV_008770	putative+WD-40+repeat-containing+protein	FR823383:1606703-1608985	0.104376	1.07503	0.794047	0.934409	11.9221	9.4903	16.2021	10.6219	5.71157	7.71376
NCLIV_008780	NCLIV_008780	sel1+domain+protein+repeat-containing+protein,related	FR823383:1614521-1625752	-0.404757	-1.32387	0.0256494	0.0925306	86.5693	68.9114	117.648	54.1227	29.1027	39.3046
NCLIV_008790	NCLIV_008790	conserved+hypothetical+protein	FR823383:1628316-1631477	-0.680824	-1.60306	0.0384768	0.127277	23.1686	18.4428	31.4861	11.9226	6.41098	8.65834
NCLIV_008800	NCLIV_008800	hypothetical+protein	FR823383:1633532-1638061	0.549161	1.46323	0.0491931	0.150754	21.2669	16.929	28.9017	25.8288	13.8886	18.7573
NCLIV_008810	NCLIV_008810	conserved+hypothetical+protein	FR823383:1639483-1642556	-1.39061	-2.62189	7.57874e-06	8.60078e-05	36.5869	29.1241	49.7216	11.48	6.17298	8.33692
NCLIV_008820	NCLIV_008820	conserved+hypothetical+protein	FR823383:1645998-1652757	-0.093201	-1.06673	0.692306	0.871974	39.3914	31.3566	53.533	30.5723	16.4393	22.202
NCLIV_008830	NCLIV_008830	putative+CDP-alcohol+phosphatidyltransferase+domain-containing+protein	FR823383:1655141-1657532	0.410143	1.32882	0.0511731	0.155353	43.5046	34.6308	59.1227	47.9141	25.7642	34.7959
NCLIV_008840	NCLIV_008840	hypothetical+protein	FR823383:1660257-1665692	-0.0845374	-1.06035	0.551661	0.765671	135.711	108.03	184.432	105.985	56.99	76.9678
NCLIV_008850	NCLIV_008850	conserved+hypothetical+protein	FR823383:1667782-1679337	-0.123502	-1.08938	0.298638	0.530446	281.247	223.88	382.215	213.794	114.961	155.26
NCLIV_008860	NCLIV_008860	hypothetical+protein	FR823383:1681626-1683572	-0.229559	-1.17248	0.121038	0.293292	127.483	101.48	173.25	90.0258	48.4084	65.3779
NCLIV_008870	NCLIV_008870	conserved+hypothetical+protein	FR823383:1685972-1686645	-0.200505	-1.1491	0.886281	0.991316	0.635251	0.505676	0.863306	0.441952	0.237645	0.320951
NCLIV_008880	NCLIV_008880	putative+ubiquitin	FR823383:1688081-1688314	-0.123216	-1.08916	0.679672	0.86287	23.3998	18.6269	31.8004	17.781	9.56114	12.9128
NCLIV_008890	NCLIV_008890	putative+tim10/DDP+zinc+finger+domain-containing+protein	FR823383:1692134-1693708	0.447862	1.36402	0.0487925	0.149649	36.7648	29.2658	49.9634	41.5743	22.3552	30.1918
NCLIV_008900	NCLIV_008900	yali0d05697p,+related	FR823383:1696172-1697420	-0.011353	-1.0079	0.90518	0.99761	908.812	723.438	1235.07	746.724	401.526	542.281
NCLIV_008910	NCLIV_008910	putative+CMGC+kinase	FR823383:1703835-1707443	-0.119575	-1.08641	0.405409	0.6302	131.821	104.933	179.145	100.473	54.0263	72.9652
NCLIV_008915	NCLIV_008915	unspecified+product	FR823383:1709870-1710696	0.454115	1.36994	0.00229191	0.0127241	95.1367	75.7313	129.291	107.978	58.0618	78.4153
NCLIV_008920	NCLIV_008920	hypothetical+protein	FR823383:1711202-1712887	0.0177963	1.01241	0.899848	0.995995	140.777	112.062	191.316	118.032	63.4679	85.7165
NCLIV_008940	NCLIV_008940	conserved+hypothetical+protein	FR823383:1713358-1714842	0.0371301	1.02607	0.879623	0.988019	49.1218	39.1022	66.7565	41.7398	22.4442	30.312
NCLIV_008950	NCLIV_008950	conserved+hypothetical+protein	FR823383:1717519-1717963	-1.64493	-3.12732	0.334449	0.555356	0.317124	0.252439	0.430971	0	0	0
NCLIV_008960	NCLIV_008960	hypothetical+protein	FR823383:1719704-1722420	-0.145576	-1.10617	0.328804	0.555356	130.438	103.832	177.266	97.6422	52.5039	70.9091
NCLIV_008970	NCLIV_008970	conserved+hypothetical+protein	FR823383:1724194-1726113	0.335211	1.26156	0.0363206	0.121438	78.2759	62.3096	106.377	81.811	43.9912	59.4123
NCLIV_008980	NCLIV_008980	f21m12.37+protein,+related	FR823383:1728560-1737842	-0.197533	-1.14674	0.112839	0.279642	364.987	290.539	496.017	263.569	141.726	191.408
NCLIV_008990	NCLIV_008990	unspecified+product	FR823383:1739380-1740264	0.658837	1.57881	4.55073e-15	2.34002e-13	4868.08	3875.12	6615.72	6364.98	3422.56	4622.34
NCLIV_009000	NCLIV_009000	hypothetical+protein	FR823383:1741046-1748311	-0.251307	-1.19028	0.259507	0.483359	50.983	40.5838	69.2859	35.4509	19.0626	25.7449
NCLIV_009010	NCLIV_009010	conserved+hypothetical+protein	FR823383:1753375-1755533	2.19718	4.58583	0.16028	0.34968	0	0	0	0.442555	0.23797	0.32139
NCLIV_009020	NCLIV_009020	conserved+hypothetical+protein	FR823383:1755865-1758303	3.02628	8.14705	0.0475115	0.146929	0	0	0	0.882648	0.474615	0.640991
NCLIV_009030	NCLIV_009030	metallophosphoesterase,+related	FR823383:1759520-1760542	-0.145014	-1.10574	0.32703	0.555356	123.009	97.9184	167.169	92.1146	49.5316	66.8949
NCLIV_009040	NCLIV_009040	conserved+hypothetical+protein	FR823383:1761476-1762161	0.142345	1.1037	0.902045	0.996097	0.951543	0.757453	1.29315	0.882724	0.474656	0.641046
NCLIV_009050	NCLIV_009050	conserved+hypothetical+protein	FR823383:1763069-1768300	-0.727601	-1.65588	0.316404	0.548247	4.5361	3.61085	6.16456	2.22047	1.19398	1.61254
NCLIV_009060	NCLIV_009060	conserved+hypothetical+protein	FR823383:1771698-1772903	-0.196278	-1.14574	0.270375	0.497142	77.1491	61.4127	104.846	55.7477	29.9765	40.4847
NCLIV_009070	NCLIV_009070	conserved+hypothetical+protein	FR823383:1774126-1779370	0.122661	1.08874	0.469066	0.687644	83.3982	66.3871	113.338	75.2067	40.4399	54.6161
NCLIV_009080	NCLIV_009080	conserved+hypothetical+protein	FR823383:1781145-1783163	-0.567251	-1.4817	6.12975e-06	7.10784e-05	249.113	198.301	338.545	139.193	74.8464	101.084
NCLIV_009090	NCLIV_009090	conserved+hypothetical+protein	FR823383:1785213-1788777	-1.20305	-2.30226	0.071389	0.199957	6.35661	5.06003	8.63864	2.21637	1.19178	1.60956
NCLIV_009100	NCLIV_009100	hypothetical+protein	FR823383:1789255-1796849	0.208203	1.15525	0.419345	0.64387	30.1022	23.9621	40.9088	28.8189	15.4964	20.9287
NCLIV_009110	NCLIV_009110	putative+TPR+domain-containing+protein	FR823383:1798208-1804662	-0.235312	-1.17716	0.803857	0.940756	1.91204	1.52203	2.59846	1.32692	0.713508	0.963628
NCLIV_009120	NCLIV_009120	putative+myosin+heavy+chain	FR823383:1807948-1811811	-1.64493	-3.12732	0.334449	0.555356	0.317124	0.252439	0.430971	0	0	0
NCLIV_009130	NCLIV_009130	conserved+hypothetical+protein	FR823383:1813633-1819131	-0.11591	-1.08366	0.657015	0.848407	30.1421	23.9939	40.9631	23.0251	12.381	16.7212
NCLIV_009140	NCLIV_009140	conserved+hypothetical+protein	FR823383:1823874-1828099	0.256758	1.19479	0.0821692	0.220617	116.631	92.8412	158.501	115.425	62.0659	83.8231
NCLIV_009150	NCLIV_009150	putative+alpha-galactosidase+A	FR823383:1830336-1837047	0.0454251	1.03199	0.7069	0.880067	282.092	224.553	383.363	241.088	129.637	175.081
NCLIV_009160	NCLIV_009160	conserved+hypothetical+protein	FR823383:1839555-1841582	0.211394	1.15781	0.557162	0.769712	13.3059	10.5918	18.0827	12.7778	6.87082	9.27939
NCLIV_009170	NCLIV_009170	proteasome+(Prosome,+macropain)+subunit,+beta+type,+1,+related	FR823383:1844607-1845564	-0.702049	-1.62681	9.07423e-08	1.56615e-06	239.236	190.438	325.122	121.737	65.4601	88.4071
NCLIV_009180	NCLIV_009180	conserved+hypothetical+protein	FR823383:1851842-1854694	-0.770028	-1.7053	0.000488522	0.00336016	61.0833	48.6239	83.0121	29.6128	15.9233	21.5052
NCLIV_009190	NCLIV_009190	conserved+hypothetical+protein	FR823383:1859680-1861142	-0.0968622	-1.06944	0.690693	0.87093	35.3181	28.1141	47.9972	27.3416	14.7021	19.8559
NCLIV_009200	NCLIV_009200	conserved+hypothetical+protein	FR823383:1865540-1871441	0.209249	1.15609	0.134844	0.31672	136.909	108.983	186.06	131.097	70.493	95.2043
NCLIV_009210	NCLIV_009210	hypothetical+protein	FR823383:1875486-1891032	0.348716	1.27343	0.00078282	0.00504469	617.73	491.729	839.495	651.479	350.312	473.113
NCLIV_009220	NCLIV_009220	conserved+hypothetical+protein	FR823383:1894184-1900637	-0.0672626	-1.04773	0.71849	0.880756	69.8992	55.6416	94.993	55.2429	29.7051	40.1182
NCLIV_009230	NCLIV_009230	conserved+hypothetical+protein	FR823383:1902059-1906519	0.0178494	1.01245	0.985739	1	1.5818	1.25915	2.14966	1.32737	0.713748	0.963951
NCLIV_009240	NCLIV_009240	conserved+hypothetical+protein	FR823383:1910827-1913700	-0.467459	-1.38267	0.0785382	0.21356	38.3848	30.5553	52.1649	22.9542	12.3429	16.6696
NCLIV_009250	NCLIV_009250	conserved+hypothetical+protein	FR823383:1917979-1918269	0	1	1	1	0	0	0	0	0	0
NCLIV_009260	NCLIV_009260	conserved+hypothetical+protein	FR823383:1920534-1924379	-0.318471	-1.24701	0.105869	0.267669	73.6427	58.6215	100.08	48.8831	26.2853	35.4995
NCLIV_009270	NCLIV_009270	conserved+hypothetical+protein	FR823383:1926596-1930539	0.0442707	1.03116	0.849856	0.968295	40.9195	32.573	55.6096	34.9476	18.7919	25.3794
NCLIV_009280	NCLIV_009280	putative+F-box+domain+containing+protein	FR823383:1933283-1935007	0.694301	1.6181	0.422293	0.646587	1.58892	1.26482	2.15934	2.20614	1.18628	1.60213
NCLIV_009290	NCLIV_009290	conserved+hypothetical+protein	FR823383:1938811-1939503	-1.64226	-3.12154	0.334808	0.555356	0.316536	0.25197	0.430172	0	0	0
NCLIV_009300	NCLIV_009300	gk17769,+related	FR823383:1942962-1947150	-0.994249	-1.99204	9.88223e-08	1.69384e-06	102.184	81.3411	138.868	42.4186	22.8092	30.805
NCLIV_009310	NCLIV_009310	putative+trafficking+protein+particle+complex+subunit+3	FR823383:1948227-1951280	-0.395647	-1.31553	0.037613	0.125086	73.7613	58.7159	100.242	46.404	24.9522	33.6992
NCLIV_009320	NCLIV_009320	putative+B-box+zinc+finger+protein	FR823383:1953269-1955389	-0.184403	-1.13635	0.61946	0.821845	15.9627	12.7067	21.6933	11.6177	6.24706	8.43696
NCLIV_009330	NCLIV_009330	conserved+hypothetical+protein	FR823383:1957484-1960905	0.0506335	1.03572	0.865954	0.980251	21.5594	17.1618	29.2992	18.4967	9.94601	13.4326
NCLIV_009340	NCLIV_009340	putative+ATPase,+AAA+family+domain-containing+protein	FR823383:1964821-1968092	0.452758	1.36865	0.21026	0.416609	12.417	9.88426	16.8747	14.1203	7.59271	10.2543
NCLIV_009350	NCLIV_009350	hypothetical+protein	FR823383:1972974-1977758	-0.254206	-1.19268	0.376877	0.599145	27.2395	21.6833	37.0185	18.8944	10.1598	13.7214
NCLIV_009360	NCLIV_009360	unspecified+product	FR823383:1979255-1986502	-1.05345	-2.07549	0.40573	0.6302	1.26817	1.0095	1.72344	0.441969	0.237654	0.320964
NCLIV_009370	NCLIV_009370	conserved+hypothetical+protein	FR823383:1989539-2001198	0.349301	1.27394	0.0798875	0.216204	49.4092	39.331	67.1471	52.1606	28.0477	37.8798
NCLIV_009390	NCLIV_009390	putative+Cleft+lip+and+palate+transmembrane+protein+1	FR823383:2002556-2010391	-1.11745	-2.16962	2.87806e-10	8.03702e-09	111.297	88.5952	151.252	42.4152	22.8074	30.8025
NCLIV_009400	NCLIV_009400	conserved+hypothetical+protein	FR823383:2012385-2018657	-0.0204045	-1.01424	0.87945	0.987974	168.497	134.128	228.987	137.578	73.9783	99.9114
NCLIV_009410	NCLIV_009410	hypothetical+protein	FR823383:2023094-2033649	-0.00171173	-1.00119	0.99175	1	84.3822	67.1704	114.675	69.7974	37.5313	50.6878
NCLIV_009420	NCLIV_009420	putative+pyruvate+kinase	FR823383:2036595-2038850	-1.27801	-2.42505	0.00207995	0.0117575	18.3127	14.5774	24.887	6.18104	3.32365	4.48875
NCLIV_009430	NCLIV_009430	hypothetical+protein	FR823383:2039255-2040907	0.156208	1.11435	0.859397	0.975599	1.89648	1.50965	2.57732	1.7641	0.948586	1.28111
NCLIV_009440	NCLIV_009440	unspecified+product	FR823383:2044329-2051051	0.510361	1.42441	3.51073e-05	0.000333452	260.573	207.423	354.119	307.426	165.308	223.257
NCLIV_009450	NCLIV_009450	60s+ribosomal+protein+L17,+related	FR823383:2053240-2055561	0.0619439	1.04387	0.479431	0.699235	1684.74	1341.1	2289.56	1456.42	783.142	1057.67
NCLIV_009460	NCLIV_009460	putative+phosphatidylinositol+N-acetylglucosaminyltransferase+subunit	FR823383:2057828-2062688	0.083762	1.05978	0.72777	0.88853	37.8443	30.125	51.4304	33.2226	17.8643	24.1267
NCLIV_009470	NCLIV_009470	hypothetical+protein	FR823383:2064598-2067165	0.408418	1.32723	0.00223123	0.0124428	140.117	111.536	190.418	154.047	82.8335	111.871
NCLIV_009480	NCLIV_009480	unspecified+product	FR823383:2069940-2077364	-2.39155	-5.24719	0.172851	0.36411	0.63341	0.504211	0.860804	0	0	0
NCLIV_009490	NCLIV_009490	neuronal+nitric+oxide+synthase,+related	FR823383:2118125-2121512	-0.516645	-1.43062	0.00948877	0.0421623	74.7964	59.5399	101.648	43.2594	23.2613	31.4156
NCLIV_009495	NCLIV_009495	unspecified+product	FR823383:2113310-2115457	-0.330109	-1.25711	0.124018	0.298188	59.8587	47.649	81.3479	39.4067	21.1897	28.6177
NCLIV_009500	NCLIV_009500	hypothetical+protein	FR823383:2121820-2127736	-0.0919764	-1.06583	0.435255	0.658317	324.051	257.953	440.385	251.778	135.385	182.845
NCLIV_009510	NCLIV_009510	deha2e04510p,+related	FR823383:2129287-2130858	-0.0216912	-1.01515	0.898148	0.995995	80.6589	64.2066	109.615	65.7982	35.3808	47.7835
NCLIV_009520	NCLIV_009520	conserved+hypothetical+protein	FR823384:34822-39690	-1.91275	-3.76526	2.65823e-06	3.36499e-05	24.6312	19.607	33.4737	5.32641	2.8641	3.86811
NCLIV_009530	NCLIV_009530	conserved+hypothetical+protein	FR823384:42585-46508	-0.510508	-1.42455	0.125825	0.301365	20.6302	16.4222	28.0364	11.9561	6.42898	8.68266
NCLIV_009540	NCLIV_009540	conserved+hypothetical+protein	FR823384:49139-51324	-0.940432	-1.9191	0.000160346	0.0012705	53.8233	42.8447	73.1458	23.1656	12.4565	16.8232
NCLIV_009550	NCLIV_009550	putative+homoserine+O-acetyltransferase	FR823384:54975-57951	0.550119	1.46421	0.715194	0.880067	0.316536	0.25197	0.430172	0.441081	0.237177	0.320319
NCLIV_009560	NCLIV_009560	conserved+hypothetical+protein	FR823384:59686-60595	-0.0293333	-1.02054	0.909507	0.999689	30.006	23.8855	40.7781	24.346	13.0913	17.6804
NCLIV_009570	NCLIV_009570	conserved+hypothetical+protein	FR823384:69172-72621	2.19238	4.57058	0.160723	0.34968	0	0	0	0.441081	0.237177	0.320319
NCLIV_009580	NCLIV_009580	unspecified+product	FR823384:73223-74419	-0.0614183	-1.04349	0.770133	0.917856	56.0143	44.5888	76.1234	44.448	23.9005	32.2788
NCLIV_009590	NCLIV_009590	gi20748,+related	FR823384:76247-78343	0.66071	1.58086	2.30938e-07	3.67922e-06	145.642	115.935	197.928	190.743	102.566	138.52
NCLIV_009600	NCLIV_009600	unspecified+product	FR823384:82497-87294	0.686838	1.60975	0.0811904	0.218627	9.22558	7.3438	12.5376	12.3745	6.654	8.98656
NCLIV_009610	NCLIV_009610	vps16-like+protein,+related	FR823384:91123-102561	0.005985	1.00416	0.971568	1	81.1657	64.61	110.304	67.4971	36.2944	49.0173
NCLIV_009620	NCLIV_009620	putative+ankyrin+repeat-containing+protein	FR823384:104228-110754	-0.533331	-1.44727	0.100762	0.257464	23.1817	18.4532	31.5039	13.227	7.11237	9.60561
NCLIV_009630	NCLIV_009630	putative+cyclophilin	FR823384:112334-120674	-0.167197	-1.12287	0.322222	0.55459	100.456	79.9655	136.52	74.0735	39.8306	53.7932
NCLIV_009640	NCLIV_009640	putative+choline+kinase	FR823384:123775-128701	0.291458	1.22388	0.0041202	0.0210125	740.836	589.725	1006.8	750.898	403.771	545.312
NCLIV_009650	NCLIV_009650	putative+queuine+tRNA-ribosyltransferase	FR823384:133335-138952	-0.913572	-1.8837	0.000116883	0.000975905	55.7244	44.3581	75.7294	24.44	13.1418	17.7487
NCLIV_009660	NCLIV_009660	conserved+hypothetical+protein	FR823384:139273-142047	-0.66771	-1.58855	0.0124961	0.0527656	37.5729	29.909	51.0615	19.5409	10.5075	14.1909
NCLIV_009670	NCLIV_009670	cold-shock+protein,+DNA-binding,+related	FR823384:146394-147107	-0.060206	-1.04261	0.529316	0.746142	912.706	726.537	1240.37	724.951	389.818	526.469
NCLIV_009680	NCLIV_009680	hypothetical+protein	FR823384:150642-163138	0.44602	1.36228	0.00106464	0.00655008	122.732	97.6979	166.793	138.507	74.4774	100.585
NCLIV_009690	NCLIV_009690	putative+glycosyl+hydrolases+family+35+domain-containing+protein	FR823384:165597-177827	-0.407047	-1.32597	0.00404115	0.0206658	202.089	160.868	274.639	126.186	67.8523	91.6379
NCLIV_009700	NCLIV_009700	elongation+factor+1-alpha,+related	FR823384:180626-186407	-0.104741	-1.0753	0.365846	0.588892	303.277	241.416	412.153	233.559	125.589	169.614
NCLIV_009710	NCLIV_009710	tubulin+polymerization-promoting+protein+family+member+3,+related	FR823384:188071-188505	-1.64493	-3.12732	0.334449	0.555356	0.317124	0.252439	0.430971	0	0	0
NCLIV_009720	NCLIV_009720	conserved+hypothetical+protein	FR823384:191500-203127	0.256965	1.19496	0.0445472	0.142176	165.256	131.548	224.583	163.561	87.9495	118.78
NCLIV_009730	NCLIV_009730	conserved+hypothetical+protein	FR823384:204281-205588	1.34938	2.54802	0.0816269	0.219556	1.59041	1.26601	2.16137	3.54774	1.90768	2.57642
NCLIV_009740	NCLIV_009740	conserved+hypothetical+protein	FR823384:207370-208800	0.542686	1.45668	0.460551	0.682677	2.52652	2.01117	3.43354	3.10319	1.66864	2.25358
NCLIV_009750	NCLIV_009750	conserved+hypothetical+protein	FR823384:212548-214677	-1.00082	-2.00114	0.01117	0.0480576	19.3963	15.4399	26.3595	7.96501	4.28292	5.7843
NCLIV_009760	NCLIV_009760	conserved+hypothetical+protein	FR823384:215325-217411	-0.331951	-1.25871	0.365411	0.588445	16.912	13.4624	22.9834	11.1	5.96865	8.06096
NCLIV_009770	NCLIV_009770	putative+patched+transmembrane+domain-containing+protein	FR823384:223173-231660	0.275416	1.21034	0.265576	0.491348	29.3955	23.3996	39.9485	29.4902	15.8574	21.4162
NCLIV_009780	NCLIV_009780	beta-lactamase+domain+protein+(Precursor),related	FR823384:234507-238360	0.669545	1.59057	2.12133e-13	8.787e-12	899.315	715.878	1222.17	1184.67	637.016	860.322
NCLIV_009790	NCLIV_009790	putative+Rab+11b	FR823384:242239-243608	-0.961677	-1.94757	1.60013e-06	2.14965e-05	80.6088	64.1667	109.547	34.2168	18.399	24.8487
NCLIV_009800	NCLIV_009800	conserved+hypothetical+protein	FR823384:246487-246876	0.318306	1.24687	0.0897864	0.23671	57.3411	45.645	77.9266	59.2397	31.8542	43.0207
NCLIV_009810	NCLIV_009810	hypothetical+protein	FR823384:250157-262414	0.115232	1.08315	0.405008	0.630162	141.097	112.317	191.751	126.576	68.0619	91.921
NCLIV_009820	NCLIV_009820	putative+ribosome+biogenesis+regulatory+protein	FR823384:265405-268033	-0.412194	-1.33071	0.00993342	0.0436953	116.731	92.921	158.638	72.6153	39.0465	52.7342
NCLIV_009830	NCLIV_009830	conserved+hypothetical+protein	FR823384:270293-281374	-1.32523	-2.50573	9.77189e-08	1.67878e-06	55.2764	44.0014	75.1205	18.1939	9.78319	13.2127
NCLIV_009840	NCLIV_009840	putative+cell+cycle+control+protein	FR823384:284932-292379	-0.0163551	-1.0114	0.899929	0.995995	173.139	137.823	235.296	141.766	76.23	102.952
NCLIV_009850	NCLIV_009850	snf2+family+N-terminal+domain-containing+protein,+related	FR823384:295195-306693	-0.074149	-1.05274	0.554584	0.768082	236.776	188.48	321.778	186.255	100.152	135.261
NCLIV_009860	NCLIV_009860	conserved+hypothetical+protein	FR823384:309766-311795	-1.64226	-3.12154	0.334808	0.555356	0.316536	0.25197	0.430172	0	0	0
NCLIV_009870	NCLIV_009870	conserved+hypothetical+protein	FR823384:312648-315160	0	1	1	1	0	0	0	0	0	0
NCLIV_009880	NCLIV_009880	conserved+hypothetical+protein	FR823384:316579-320875	-0.795514	-1.7357	2.97358e-06	3.71997e-05	110.099	87.6414	149.624	52.4785	28.2186	38.1106
NCLIV_009890	NCLIV_009890	putative+transmembrane+domain-containing+protein	FR823384:322750-328349	0.826738	1.77367	0.00221047	0.0123363	20.494	16.3138	27.8514	30.1967	16.2373	21.9292
NCLIV_009900	NCLIV_009900	srs+domain-containing+protein	FR823384:332737-333882	0	1	1	1	0	0	0	0	0	0
NCLIV_009910	NCLIV_009910	srs+domain-containing+protein	FR823384:335810-336970	0	1	1	1	0	0	0	0	0	0
NCLIV_009920	NCLIV_009920	srs+domain-containing+protein	FR823384:338742-339917	0	1	1	1	0	0	0	0	0	0
NCLIV_009930	NCLIV_009930	srs+domain-containing+protein	FR823384:343555-344727	-1.64226	-3.12154	0.334808	0.555356	0.316536	0.25197	0.430172	0	0	0
NCLIV_009940	NCLIV_009940	srs+domain-containing+protein	FR823384:346652-347836	-3.24759	-9.49776	0.0542739	0.161956	1.26717	1.0087	1.72208	0	0	0
NCLIV_009950	NCLIV_009950	srs+domain-containing+protein	FR823384:349752-350921	-2.3889	-5.23757	0.173167	0.36411	0.632245	0.503283	0.85922	0	0	0
NCLIV_009960	NCLIV_009960	srs+domain-containing+protein	FR823384:355949-357139	0	1	1	1	0	0	0	0	0	0
NCLIV_009970	NCLIV_009970	srs+domain-containing+protein	FR823384:359007-360173	0	1	1	1	0	0	0	0	0	0
NCLIV_009980	NCLIV_009980	srs+domain-containing+protein	FR823384:362069-363259	0	1	1	1	0	0	0	0	0	0
NCLIV_009990	NCLIV_009990	srs+domain-containing+protein	FR823384:365516-366712	0	1	1	1	0	0	0	0	0	0
NCLIV_010000	NCLIV_010000	srs+domain-containing+protein	FR823384:369195-370361	0	1	1	1	0	0	0	0	0	0
NCLIV_010010	NCLIV_010010	het-R,+related	FR823384:376805-380585	-0.174833	-1.12883	0.217483	0.4265	147.409	117.341	200.329	108.128	58.1425	78.5243
NCLIV_010020	NCLIV_010020	ubiquinol-cytochrome+c+reductase+iron-sulfur+subunit,+related	FR823384:382942-386089	-0.250335	-1.18948	0.0221748	0.0829166	420.741	334.921	571.787	292.909	157.502	212.714
NCLIV_010030	NCLIV_010030	Bradyzoite+surface+protein+BSR4	FR823384:392666-393907	2.06892	4.19573	7.56e-06	8.59258e-05	4.4097	3.51023	5.99278	15.7124	8.44884	11.4106
NCLIV_010040	NCLIV_010040	srs+domain-containing+protein	FR823384:395968-397242	2.57545	5.96056	0.000861567	0.00549047	0.95004	0.756257	1.2911	5.30148	2.8507	3.85001
NCLIV_010050	NCLIV_010050	srs+domain-containing+protein	FR823384:400662-402041	0.903965	1.8712	6.41009e-07	9.40819e-06	61.1114	48.6462	83.0503	94.8041	50.9778	68.8481
NCLIV_010060	NCLIV_010060	srs+domain-containing+protein	FR823384:404050-405201	2.19718	4.58583	0.16028	0.34968	0	0	0	0.442555	0.23797	0.32139
NCLIV_010070	NCLIV_010070	srs+domain-containing+protein	FR823384:407752-409023	0	1	1	1	0	0	0	0	0	0
NCLIV_010080	NCLIV_010080	srs+domain-containing+protein	FR823384:410852-411802	3.55853	11.7821	0.0151687	0.0615333	0	0	0	1.33088	0.715639	0.966506
NCLIV_010090	NCLIV_010090	conserved+hypothetical+protein	FR823384:416528-422694	0.138296	1.1006	0.468665	0.68731	61.0538	48.6004	82.9721	55.6601	29.9294	40.4211
NCLIV_010100	NCLIV_010100	hypothetical+protein	FR823384:424011-429882	0.602709	1.51857	0.315377	0.547103	3.80952	3.03248	5.17714	4.85521	2.61073	3.52592
NCLIV_010110	NCLIV_010110	hypothetical+protein	FR823384:434977-436429	0.260993	1.1983	0.0470255	0.146929	163.338	130.021	221.976	162.115	87.172	117.73
NCLIV_010120	NCLIV_010120	conserved+hypothetical+protein	FR823384:438841-439779	-0.16275	-1.11942	0.501388	0.72016	36.4164	28.9884	49.4899	26.9275	14.4794	19.5551
NCLIV_010130	NCLIV_010130	helicase,+DEAD/DEAH+family+protein,+related	FR823384:441099-442325	-0.886626	-1.84885	0.000254871	0.001889	47.5252	37.8313	64.5867	21.2308	11.4161	15.4181
NCLIV_010140	NCLIV_010140	putative+proliferating+cell+nuclear+antigen	FR823384:444831-446971	-1.60978	-3.05206	6.19774e-11	1.90166e-09	63.6782	50.6895	86.5386	17.1954	9.24625	12.4875
NCLIV_010150	NCLIV_010150	putative+RNA+recognition+motif-containing+protein	FR823384:456398-462317	0.242937	1.1834	0.0752803	0.207118	143.66	114.357	195.234	140.813	75.7174	102.26
NCLIV_010160	NCLIV_010160	conserved+hypothetical+protein	FR823384:469540-472243	2.49633	5.64247	0.00625634	0.029655	0.632482	0.503472	0.859543	3.52737	1.89673	2.56162
NCLIV_010170	NCLIV_010170	conserved+hypothetical+protein	FR823384:482630-490266	0.139208	1.1013	0.43932	0.662133	76.802	61.1363	104.374	70.0599	37.6724	50.8785
NCLIV_010180	NCLIV_010180	putative+CDK-activating+kinase+assembly+factor	FR823384:496499-498694	0.0624132	1.04421	0.803164	0.940756	32.7049	26.0339	44.4459	28.2873	15.2105	20.5426
NCLIV_010190	NCLIV_010190	conserved+hypothetical+protein	FR823384:500860-504345	-0.105578	-1.07593	0.526358	0.74441	91.3117	72.6865	124.093	70.2746	37.7879	51.0344
NCLIV_010200	NCLIV_010200	hypothetical+protein	FR823384:506645-509689	-0.013466	-1.00938	0.872966	0.983963	2422.33	1928.24	3291.95	1987.4	1068.66	1443.27
NCLIV_010210	NCLIV_010210	putative+rar1	FR823384:517351-520722	-0.605995	-1.52203	0.0200335	0.0764822	38.1671	30.382	51.8691	20.7244	11.1439	15.0504
NCLIV_010220	NCLIV_010220	conserved+hypothetical+protein	FR823384:525518-527905	-0.177621	-1.13102	0.285435	0.51499	88.7435	70.6421	120.602	64.9648	34.9327	47.1783
NCLIV_010230	NCLIV_010230	hypothetical+protein	FR823384:531348-533171	-0.00781333	-1.00543	0.957757	1	142.817	113.686	194.088	117.633	63.253	85.4263
NCLIV_010240	NCLIV_010240	conserved+hypothetical+protein	FR823384:540857-548769	-0.00988538	-1.00688	0.9475	1	118.931	94.672	161.627	97.8194	52.5992	71.0378
NCLIV_010250	NCLIV_010250	hypothetical+protein	FR823384:551480-553045	-0.157354	-1.11524	0.582054	0.794979	25.6579	20.4243	34.869	19.0396	10.2379	13.8268
NCLIV_010260	NCLIV_010260	hypothetical+protein	FR823384:554631-562262	-0.221358	-1.16583	0.268664	0.494974	61.7008	49.1155	83.8514	43.8113	23.5581	31.8164
NCLIV_010270	NCLIV_010270	putative+thrombospondin+type+1+domain-containing+protein	FR823384:564842-571644	0.635171	1.55312	0.606613	0.811667	0.634079	0.504743	0.861712	0.883848	0.47526	0.641862
NCLIV_010280	NCLIV_010280	putative+serine+protease/subtilase	FR823384:574640-581047	0.0191351	1.01335	0.984772	1	1.57718	1.25547	2.14338	1.32467	0.7123	0.961996
NCLIV_010290	NCLIV_010290	c8orf53+homolog,+related	FR823384:583382-588659	0.0630996	1.04471	0.77799	0.923089	46.6048	37.0986	63.3359	40.325	21.6834	29.2845
NCLIV_010300	NCLIV_010300	putative+synaptosomal-associated+protein+25	FR823384:592788-596502	0.0509617	1.03596	0.767758	0.916178	79.6378	63.3938	108.228	68.3273	36.7408	49.6202
NCLIV_010310	NCLIV_010310	conserved+hypothetical+protein	FR823384:598393-606317	-0.0142893	-1.00995	0.927633	1	110.733	88.1465	150.486	90.7987	48.824	65.9392
NCLIV_010320	NCLIV_010320	putative+dihydrolipoamide+branched+chain+transacylase,+E2+subunit	FR823384:610541-616539	-0.131837	-1.09569	0.286518	0.515885	265.838	211.614	361.273	200.915	108.036	145.907
NCLIV_010330	NCLIV_010330	conserved+hypothetical+protein	FR823384:618685-624085	0.00669259	1.00465	0.980822	1	26.9983	21.4914	36.6907	22.4623	12.0784	16.3125
NCLIV_010340	NCLIV_010340	conserved+hypothetical+protein	FR823384:627015-637282	-0.160274	-1.1175	0.435333	0.658317	56.1408	44.6895	76.2953	41.591	22.3642	30.2039
NCLIV_010350	NCLIV_010350	conserved+hypothetical+protein	FR823384:641797-642656	-0.428634	-1.34596	0.0723444	0.202152	42.5912	33.9037	57.8814	26.1735	14.0739	19.0076
NCLIV_010360	NCLIV_010360	putative+MORN+repeat-containing+protein	FR823384:646923-658453	0.367224	1.28987	0.00784686	0.0358934	120.571	95.9774	163.856	128.829	69.2734	93.5571
NCLIV_010370	NCLIV_010370	ubiquitin+carrier+protein,+related	FR823384:659938-661781	-0.0477532	-1.03365	0.673706	0.859099	405.724	322.967	551.378	325.052	174.786	236.058
NCLIV_010380	NCLIV_010380	DNA+polymerase,+related	FR823384:666536-687927	-1.04114	-2.05785	4.64109e-09	1.055e-07	118.103	94.013	160.502	47.4652	25.5228	34.4698
NCLIV_010390	NCLIV_010390	novel+protein+(Zgc:77804),+related	FR823384:690514-692519	-0.100064	-1.07182	0.446304	0.667799	170.942	136.074	232.31	132.07	71.0161	95.9107
NCLIV_010400	NCLIV_010400	hypothetical+protein	FR823384:696227-699874	0.0609047	1.04312	0.849275	0.968121	19.2775	15.3454	26.1982	16.6587	8.95769	12.0978
NCLIV_010410	NCLIV_010410	conserved+hypothetical+protein	FR823384:702618-703811	0.33735	1.26343	0.177266	0.369912	28.7208	22.8625	39.0316	30.0825	16.1758	21.8463
NCLIV_010420	NCLIV_010420	conserved+hypothetical+protein	FR823384:706232-711664	-1.12553	-2.18181	0.00246628	0.0135909	21.2285	16.8984	28.8495	7.99012	4.29642	5.80253
NCLIV_010430	NCLIV_010430	putative+kinesin+motor+domain-containing+protein	FR823384:715096-722338	-0.278463	-1.2129	0.0825587	0.221583	102.897	81.9088	139.837	70.2345	37.7663	51.0052
NCLIV_010440	NCLIV_010440	protein+kinase+domain+containing+protein,+related	FR823384:724654-729371	-0.95745	-1.94187	0.339151	0.559567	2.221	1.76797	3.01834	0.886871	0.476886	0.644058
NCLIV_010450	NCLIV_010450	conserved+hypothetical+protein	FR823384:732202-733024	-0.548384	-1.46245	0.102741	0.261534	21.2602	16.9237	28.8926	11.9994	6.45226	8.7141
NCLIV_010460	NCLIV_010460	conserved+hypothetical+protein	FR823384:733248-734705	-1.64226	-3.12154	0.334808	0.555356	0.316536	0.25197	0.430172	0	0	0
NCLIV_010470	NCLIV_010470	hypothetical+protein	FR823384:734868-735770	0	1	1	1	0	0	0	0	0	0
NCLIV_010480	NCLIV_010480	conserved+hypothetical+protein	FR823384:738892-740652	0.551568	1.46568	0.0174179	0.0684596	31.904	25.3964	43.3575	38.7834	20.8545	28.1651
NCLIV_010490	NCLIV_010490	hypothetical+protein	FR823384:744003-746365	0.525505	1.43944	0.0238987	0.0879074	31.0911	24.7493	42.2528	37.1168	19.9583	26.9547
NCLIV_010500	NCLIV_010500	hypothetical+protein	FR823384:749257-751383	-0.126369	-1.09154	0.539498	0.755399	58.9828	46.9519	80.1577	44.7395	24.0572	32.4904
NCLIV_010510	NCLIV_010510	putative+3'+exoribonuclease	FR823384:753374-757790	0.567229	1.48168	0.000176155	0.00137386	101.635	80.9043	138.122	124.772	67.0919	90.6109
NCLIV_010520	NCLIV_010520	conserved+hypothetical+protein	FR823384:759913-764859	0.641307	1.55974	7.2726e-12	2.55776e-10	1406.42	1119.55	1911.32	1816.72	976.884	1319.33
NCLIV_010530	NCLIV_010530	conserved+hypothetical+protein	FR823384:767619-768449	-1.12963	-2.18803	4.2038e-06	5.07998e-05	51.6666	41.1279	70.2149	19.4878	10.4789	14.1523
NCLIV_010540	NCLIV_010540	conserved+hypothetical+protein	FR823384:771625-779172	-0.0284248	-1.0199	0.841559	0.96459	155.428	123.725	211.227	126.204	67.862	91.651
NCLIV_010550	NCLIV_010550	putative+protein+kinase+(incomplete+catalytic+triad)	FR823384:783853-801881	0.200302	1.14894	0.164677	0.355996	120.929	96.2627	164.343	115.08	61.8807	83.573
NCLIV_010560	NCLIV_010560	conserved+hypothetical+protein	FR823384:803471-806461	-0.680359	-1.60254	0.00761878	0.0350004	39.3793	31.3469	53.5164	20.3038	10.9177	14.7449
NCLIV_010570	NCLIV_010570	conserved+hypothetical+protein	FR823384:810934-830350	-0.192128	-1.14245	0.21425	0.421567	123.302	98.152	167.568	89.3653	48.0532	64.8983
NCLIV_010580	NCLIV_010580	conserved+hypothetical+protein	FR823384:831943-837445	0.441586	1.3581	0.0652762	0.186905	35.5463	28.2958	48.3074	40.0255	21.5224	29.0671
NCLIV_010590	NCLIV_010590	putative+WD-40+repeat+protein	FR823384:841122-847080	-0.3845	-1.30541	0.0225893	0.0840867	99.4397	79.1565	135.138	63.0553	33.9059	45.7916
NCLIV_010600	NCLIV_010600	putative+microneme+protein+MIC3	FR823384:849239-850327	0.536456	1.4504	2.73371e-12	1.00904e-10	22872.4	18207	31083.6	27473	14772.7	19951.3
NCLIV_010610	NCLIV_010610	hypothetical+protein	FR823384:853818-856572	-0.248829	-1.18824	0.198281	0.399649	71.7802	57.1389	97.5492	50.0088	26.8906	36.3171
NCLIV_010620	NCLIV_010620	conserved+hypothetical+protein	FR823384:859427-864181	-0.155648	-1.11392	0.334756	0.555356	99.1947	78.9615	134.805	73.7336	39.6478	53.5463
NCLIV_010630	NCLIV_010630	cDNA+FLJ53078,+highly+similar+to+Splicing+factor,arginine/serine-rich+1,+related	FR823384:867006-872168	-0.295973	-1.22771	0.0353252	0.118695	153.316	122.043	208.356	103.394	55.5969	75.0864
NCLIV_010640	NCLIV_010640	conserved+hypothetical+protein	FR823384:875597-881928	1.04778	2.06735	0.293842	0.52401	0.95412	0.759504	1.29665	1.76621	0.949721	1.28264
NCLIV_010650	NCLIV_010650	conserved+hypothetical+protein	FR823384:885293-886770	-0.16604	-1.12197	0.32905	0.555356	87.1756	69.394	118.472	64.3315	34.5922	46.7184
NCLIV_010660	NCLIV_010660	conserved+hypothetical+protein	FR823384:888911-897472	-0.113249	-1.08166	0.393375	0.617768	163.79	130.381	222.59	125.391	67.4251	91.061
NCLIV_010670	NCLIV_010670	conserved+hypothetical+protein	FR823384:903268-905517	2.19522	4.57958	0.160461	0.34968	0	0	0	0.441952	0.237645	0.320951
NCLIV_010680	NCLIV_010680	conserved+hypothetical+protein	FR823384:910928-922148	5.11015	34.5388	3.82945e-12	1.37271e-10	0.317092	0.252414	0.430928	13.2135	7.1051	9.59579
NCLIV_010690	NCLIV_010690	hypothetical+protein	FR823384:924128-928610	-0.799065	-1.73997	0.0025837	0.0140922	39.0332	31.0714	53.0461	18.5256	9.96153	13.4535
NCLIV_010700	NCLIV_010700	conserved+hypothetical+protein	FR823384:931238-936920	-0.00504469	-1.0035	0.989625	1	12.3036	9.794	16.7206	10.1527	5.45929	7.37304
NCLIV_010710	NCLIV_010710	srs+domain-containing+protein	FR823384:941292-943024	0.383976	1.30493	0.0120783	0.0513125	99.6079	79.2905	135.367	107.681	57.9017	78.1992
NCLIV_010720	NCLIV_010720	srs+domain-containing+protein	FR823384:945730-947484	0.372617	1.2947	1.20726e-05	0.000130077	2046.9	1629.39	2781.74	2194.71	1180.13	1593.83
NCLIV_010730	NCLIV_010730	srs+domain-containing+protein	FR823384:949695-951378	0.433717	1.35071	5.32092e-08	9.8365e-07	4676.91	3722.94	6355.91	5231.53	2813.08	3799.21
NCLIV_010740	NCLIV_010740	putative+kelch+motif+domain-containing+protein	FR823384:955080-956774	0.436547	1.35336	2.64687e-06	3.35963e-05	928.094	738.786	1261.28	1040.23	559.348	755.427
NCLIV_010741	NCLIV_010741	hypothetical+protein	FR823384:959614-961488	2.16766	4.49294	6.49442e-11	1.98452e-09	8.49364	6.76116	11.5429	32.0299	17.223	23.2606
NCLIV_010750	NCLIV_010750	conserved+hypothetical+protein	FR823384:965676-969884	-0.520805	-1.43476	0.0346908	0.117091	46.5674	37.0688	63.285	26.8413	14.433	19.4925
NCLIV_010760	NCLIV_010760	hypothetical+protein	FR823384:977177-999529	-1.83786	-3.5748	1.06756e-16	6.57831e-15	95.8252	76.2793	130.226	22.11	11.8889	16.0565
NCLIV_010770	NCLIV_010770	putative+glycosylphosphatidylinositol+anchor+attachment+1+protein	FR823384:1006742-1014190	-0.0535624	-1.03782	0.779134	0.923785	76.0481	60.5363	103.349	60.6787	32.628	44.0657
NCLIV_010780	NCLIV_010780	hypothetical+protein	FR823384:1017367-1024046	-0.153438	-1.11222	0.629323	0.829896	21.4307	17.0594	29.1243	15.9437	8.57322	11.5786
NCLIV_010790	NCLIV_010790	putative+Aurora+kinase(incomplete+catalytic+triad)	FR823384:1029140-1038798	-1.38888	-2.61875	1.12677e-07	1.91809e-06	54.617	43.4766	74.2245	17.1958	9.24649	12.4878
NCLIV_010800	NCLIV_010800	conserved+hypothetical+protein	FR823384:1041457-1044861	-1.24134	-2.36417	0.000138381	0.00112515	29.2854	23.3119	39.7988	10.1869	5.47769	7.39789
NCLIV_010810	NCLIV_010810	putative+deoxyribose-phosphate+aldolase	FR823384:1046794-1048015	-1.64226	-3.12154	0.334808	0.555356	0.316536	0.25197	0.430172	0	0	0
NCLIV_010820	NCLIV_010820	conserved+hypothetical+protein	FR823384:1048947-1051157	0	1	1	1	0	0	0	0	0	0
NCLIV_010830	NCLIV_010830	putative+UDP-N-acetyl-D-galactosamine:polypeptide+N-acetylgalactosaminyltransferase+T3	FR823384:1052664-1056088	-2.44124	-5.43108	5.5164e-14	2.43374e-12	46.9036	37.3365	63.742	7.05147	3.7917	5.12087
NCLIV_010840	NCLIV_010840	hypothetical+protein	FR823384:1059891-1063450	-0.130974	-1.09503	0.668725	0.855396	22.0961	17.5891	30.0286	16.7001	8.97994	12.1279
NCLIV_010850	NCLIV_010850	mgc81714+protein,+related	FR823384:1065693-1074583	0.123064	1.08904	0.375566	0.59843	134.612	107.155	182.938	121.416	65.2875	88.174
NCLIV_010860	NCLIV_010860	putative+eukaryotic+translation+initiation+factor+6	FR823384:1077019-1079648	0.300874	1.23189	0.0293506	0.102886	156.822	124.834	213.12	160.014	86.042	116.204
NCLIV_010870	NCLIV_010870	probable+RNA-binding+protein+19,+related	FR823384:1083326-1086874	-0.118583	-1.08567	0.58282	0.795589	60.1065	47.8463	81.6846	45.8393	24.6486	33.2891
NCLIV_010880	NCLIV_010880	putative+3',5'--cyclic-nucleotide+phosphodiesterase	FR823384:1089709-1099441	0.179037	1.13213	0.495089	0.713556	28.7876	22.9156	39.1223	27.0072	14.5222	19.613
NCLIV_010890	NCLIV_010890	putative+protein+phosphatase+2C	FR823384:1102076-1103936	0.18819	1.13933	0.134726	0.31672	197.594	157.29	268.53	186.452	100.259	135.404
NCLIV_010900	NCLIV_010900	hypothetical+protein	FR823384:1107194-1110475	-0.00106954	-1.00074	0.998148	1	6.94269	5.52656	9.43511	5.74467	3.08901	4.17186
NCLIV_010910	NCLIV_010910	conserved+hypothetical+protein	FR823384:1113146-1114156	-0.487784	-1.40229	0.196691	0.397864	15.794	12.5724	21.464	9.29147	4.99618	6.74759
NCLIV_010920	NCLIV_010920	hypothetical+protein	FR823384:1116550-1125397	0.107464	1.07733	0.47269	0.692078	101.527	80.8181	137.975	90.5903	48.712	65.7879
NCLIV_010930	NCLIV_010930	unspecified+product	FR823384:1128341-1132507	2.12083	4.34945	1.41943e-49	4.81057e-47	57.7628	45.9807	78.4996	208.471	112.098	151.394
NCLIV_010940	NCLIV_010940	hypothetical+protein	FR823384:1137934-1139199	0.0984946	1.07066	0.726403	0.887297	27.2361	21.6806	37.0138	24.1552	12.9887	17.5418
NCLIV_010950	NCLIV_010950	atp-binding+protein,+Mrp/Nbp35+family,+related	FR823384:1140934-1145711	0.0644807	1.04571	0.73705	0.896045	65.4472	52.0976	88.9427	56.6841	30.48	41.1647
NCLIV_010960	NCLIV_010960	putative+phosphoglucomutase	FR823384:1148045-1152799	0.407772	1.32664	0.000758184	0.00490288	226.318	180.155	307.566	248.683	133.721	180.597
NCLIV_010970	NCLIV_010970	hypothetical+protein	FR823384:1155293-1157095	0.284526	1.21801	0.0235634	0.0868458	206.782	164.604	281.016	208.604	112.17	151.491
NCLIV_010980	NCLIV_010980	putative+3-methyl-2-oxobutanoate+dehydrogenase+(lipoamide)+kinase	FR823384:1159750-1165894	0.527255	1.44118	0.012395	0.0524206	40.0436	31.8758	54.4193	47.8468	25.7281	34.747
NCLIV_010990	NCLIV_010990	conserved+hypothetical+protein	FR823384:1167855-1170423	-1.31459	-2.48731	0.0102574	0.0449083	12.067	9.6056	16.399	3.94477	2.12117	2.86475
NCLIV_011000	NCLIV_011000	fibrillin+1,+related	FR823384:1171610-1174177	1.1347	2.19572	0.0034398	0.0180233	7.92717	6.31023	10.773	14.5624	7.83045	10.5754
NCLIV_011010	NCLIV_011010	hypothetical+protein	FR823384:1176996-1186591	-0.159808	-1.11714	0.362597	0.584798	80.9628	64.4484	110.028	60.0049	32.2657	43.5764
NCLIV_011020	NCLIV_011020	hypothetical+protein	FR823384:1186957-1193891	0.535459	1.4494	0.047817	0.147585	22.1081	17.5986	30.0449	26.5912	14.2985	19.3109
NCLIV_011030	NCLIV_011030	conserved+hypothetical+protein	FR823384:1198206-1207204	0.248457	1.18794	0.167682	0.360195	64.1369	51.0547	87.1621	63.1195	33.9404	45.8382
NCLIV_011040	NCLIV_011040	putative+N-ethylmaleimide-sensitive+factor	FR823384:1210746-1221800	-0.165422	-1.12149	0.295518	0.526118	110.74	88.1519	150.496	81.7588	43.9631	59.3744
NCLIV_011050	NCLIV_011050	conserved+hypothetical+protein	FR823384:1225055-1225814	0	1	1	1	0	0	0	0	0	0
NCLIV_011060	NCLIV_011060	conserved+hypothetical+protein	FR823384:1227138-1229707	0.0507338	1.03579	0.877635	0.986528	17.4322	13.8765	23.6904	14.9579	8.04314	10.8627
NCLIV_011070	NCLIV_011070	aar147wp,+related	FR823384:1232057-1241573	0.0355344	1.02494	0.84047	0.96459	72.8622	58.0002	99.0197	61.8486	33.2571	44.9153
NCLIV_011080	NCLIV_011080	unspecified+product	FR823384:1247589-1255010	-1.01818	-2.02536	6.30728e-08	1.14143e-06	94.7168	75.397	128.72	38.6663	20.7916	28.08
NCLIV_011090	NCLIV_011090	putative+cation-transporting+ATPase	FR823384:1258091-1264426	-0.368863	-1.29133	0.0831493	0.222832	53.6816	42.732	72.9533	34.3989	18.4969	24.9809
NCLIV_011100	NCLIV_011100	putative+zinc+finger+(C3HC4+RING+finger)+protein	FR823384:1266097-1266714	1.16298	2.23919	0.306219	0.536837	0.632211	0.503256	0.859174	1.32468	0.712303	0.962001
NCLIV_011110	NCLIV_011110	putative+DEAH-box+RNA/DNA+helicase	FR823384:1267586-1280413	0.290392	1.22297	0.0147851	0.0602722	212.213	168.927	288.397	214.956	115.585	156.104
NCLIV_011120	NCLIV_011120	malate+dehydrogenase,+related	FR823384:1287177-1290347	-0.177411	-1.13085	0.10155	0.258857	435.042	346.304	591.221	318.573	171.302	231.352
NCLIV_011130	NCLIV_011130	30s+ribosomal+protein+S16,+related	FR823384:1294653-1295639	-0.368484	-1.291	0.076466	0.209299	57.215	45.5446	77.7552	36.6743	19.7204	26.6334
NCLIV_011140	NCLIV_011140	gl18351,+related	FR823384:1299001-1303563	-0.65055	-1.56977	7.81006e-07	1.12634e-05	228.381	181.797	310.37	120.439	64.7619	87.4642
NCLIV_011150	NCLIV_011150	conserved+hypothetical+protein	FR823384:1305264-1314772	-0.0442599	-1.03115	0.810805	0.944883	68.288	54.359	92.8033	54.8402	29.4885	39.8257
NCLIV_011160	NCLIV_011160	conserved+hypothetical+protein	FR823384:1321411-1326350	0.180969	1.13365	0.161516	0.351096	223.033	177.54	303.102	209.405	112.6	152.072
NCLIV_011165	NCLIV_011165	unspecified+product	FR823384:1329849-1331231	-0.876052	-1.83535	0.00572502	0.0274946	28.4263	22.628	38.6313	12.7704	6.86686	9.27403
NCLIV_011170	NCLIV_011170	hypothetical+protein	FR823384:1335843-1344845	0.0920528	1.06589	0.498566	0.716968	147.819	117.667	200.885	130.489	70.1662	94.7629
NCLIV_011180	NCLIV_011180	conserved+hypothetical+protein	FR823384:1350762-1351460	-0.128396	-1.09308	0.512402	0.731325	63.3317	50.4137	86.0678	47.9708	25.7947	34.8371
NCLIV_011190	NCLIV_011190	moz/SAS+family+protein,+related	FR823384:1355028-1359572	0.238892	1.18009	0.133343	0.314324	88.2515	70.2505	119.934	86.269	46.3883	62.6497
NCLIV_011200	NCLIV_011200	atp-dependent+Clp+protease+proteolytic+subunit,related	FR823384:1363175-1364961	-0.197191	-1.14646	0.347237	0.56817	58.333	46.4346	79.2746	42.1207	22.649	30.5887
NCLIV_011210	NCLIV_011210	transketolase,+related	FR823384:1365848-1374587	-0.0194919	-1.0136	0.86507	0.980088	336.42	267.799	457.194	274.862	147.798	199.609
NCLIV_011220	NCLIV_011220	protease+Do+(Precursor),+related	FR823384:1376666-1381723	-0.642525	-1.56106	0.0270961	0.0965719	35.0203	27.8771	47.5926	18.5337	9.96589	13.4594
NCLIV_011230	NCLIV_011230	conserved+hypothetical+protein	FR823384:1384539-1385462	1.36033	2.56744	0.152756	0.346924	0.946909	0.753764	1.28685	2.20574	1.18606	1.60184
NCLIV_011240	NCLIV_011240	fkbp-type+peptidyl-prolyl+cis-trans+isomerase+FklB,+related	FR823384:1386018-1388129	-0.358619	-1.2822	0.480067	0.699584	8.26827	6.58175	11.2366	5.3131	2.85694	3.85844
NCLIV_011250	NCLIV_011250	taf5-like+RNA+polymerase+II,+p300/CBP-associated+factor+(PCAF)-associated+factor,+65kDa,+related	FR823384:1389453-1396989	0.0365169	1.02563	0.82925	0.95829	87.4941	69.6476	118.904	74.3185	39.9623	53.9711
NCLIV_011260	NCLIV_011260	putative+tubulin-tyrosine+ligase+family+protein	FR823384:1399857-1407385	-0.508844	-1.42291	0.632517	0.831918	1.58306	1.26016	2.15138	0.88442	0.475568	0.642278
NCLIV_011270	NCLIV_011270	hypothetical+protein	FR823384:1412526-1415336	-0.473748	-1.38871	2.39734e-06	3.06597e-05	698.073	555.684	948.68	416.252	223.826	302.288
NCLIV_011280	NCLIV_011280	conserved+hypothetical+protein	FR823384:1416230-1419225	0	1	1	1	0	0	0	0	0	0
NCLIV_011290	NCLIV_011290	conserved+hypothetical+protein	FR823384:1422749-1426396	-0.323565	-1.25142	0.126408	0.301976	55.5276	44.2014	75.462	36.7211	19.7456	26.6674
NCLIV_011300	NCLIV_011300	putative+phosphoglycerate+mutase	FR823384:1429678-1441213	-0.158963	-1.11648	0.464897	0.685983	47.77	38.0262	64.9195	35.4197	19.0458	25.7222
NCLIV_011305	NCLIV_011305	srs+domain-containing+protein	FR823384:1442769-1443926	-3.25435	-9.54237	0.0538245	0.16143	1.27313	1.01345	1.73019	0	0	0
NCLIV_011310	NCLIV_011310	putative+iron-sulfur+cluster+assembly+accessory+domain+containing+protein	FR823384:1454943-1456589	0.156322	1.11444	0.443173	0.664849	52.1306	41.4973	70.8454	48.1266	25.8785	34.9502
NCLIV_011320	NCLIV_011320	vesicle-associated+membrane+protein-associated+protein+A,+related	FR823384:1459780-1460499	-0.260433	-1.19784	0.0773685	0.211072	149.779	119.228	203.549	103.53	55.6696	75.1846
NCLIV_011330	NCLIV_011330	putative+major+facilitator+superfamily+domain-containing+protein	FR823384:1463502-1465280	0.0826387	1.05895	0.575027	0.787546	112.162	89.2837	152.428	98.3697	52.8951	71.4374
NCLIV_011340	NCLIV_011340	os02g0511500+protein,+related	FR823384:1468328-1475954	-0.343721	-1.26903	0.0300449	0.105011	114.709	91.3111	155.889	74.8295	40.2371	54.3422
NCLIV_011350	NCLIV_011350	hypothetical+protein	FR823384:1477413-1481669	-2.39572	-5.2624	0.172355	0.36411	0.635251	0.505676	0.863306	0	0	0
NCLIV_011360	NCLIV_011360	putative+SET+domain-containing+protein	FR823384:1486756-1495355	0.141137	1.10277	0.377658	0.599877	85.8995	68.3782	116.737	78.4603	42.1894	56.9789
NCLIV_011370	NCLIV_011370	unspecified+product	FR823384:1498460-1503765	0.371389	1.2936	0.000831598	0.0053131	360.095	286.645	489.369	385.799	207.451	280.173
NCLIV_011380	NCLIV_011380	putative+TB2/DP1,+HVA22+domain-containing+protein	FR823384:1511648-1512154	0.00750668	1.00522	0.950718	1	259.861	206.856	353.151	216.325	116.322	157.098
NCLIV_011390	NCLIV_011390	putative+SAC3/GANP+family+protein	FR823384:1514239-1523709	-0.114438	-1.08255	0.403789	0.629156	148.309	118.057	201.551	113.445	61.0012	82.3851
NCLIV_011400	NCLIV_011400	putative+ATP-dependent+helicase	FR823384:1529081-1545124	-0.111839	-1.0806	0.508154	0.726658	81.9645	65.2458	111.39	62.8055	33.7716	45.6102
NCLIV_011410	NCLIV_011410	protein+disulfide+isomerase	FR823384:1549859-1551723	-0.61646	-1.53311	1.15116e-11	3.95534e-10	2214.14	1762.51	3009.02	1195.97	643.095	868.532
NCLIV_011420	NCLIV_011420	putative+S1+RNA-binding+domain+containing+protein	FR823384:1554010-1556128	-0.196161	-1.14565	0.113585	0.280707	224.831	178.971	305.545	162.505	87.3819	118.014
NCLIV_011430	NCLIV_011430	conserved+hypothetical+protein	FR823384:1558657-1560075	-0.028819	-1.02018	0.925307	1	21.2432	16.9101	28.8695	17.2419	9.27127	12.5213
NCLIV_011440	NCLIV_011440	conserved+hypothetical+protein	FR823384:1568804-1578977	0.275732	1.21061	0.0159564	0.0636549	265.85	211.624	361.29	266.556	143.332	193.577
NCLIV_011450	NCLIV_011450	conserved+hypothetical+protein	FR823384:1581316-1583486	-0.220108	-1.16482	0.174051	0.365251	110.995	88.3547	150.842	78.8941	42.4227	57.294
NCLIV_011460	NCLIV_011460	conserved+hypothetical+protein	FR823384:1586843-1590146	0.337052	1.26317	0.00577154	0.0276382	247.565	197.068	336.441	259.008	139.273	188.095
NCLIV_011470	NCLIV_011470	conserved+hypothetical+protein	FR823384:1592906-1600221	0.391859	1.31208	0.00171174	0.00982792	258.799	206.011	351.708	281.249	151.232	204.247
NCLIV_011480	NCLIV_011480	hypothetical+protein	FR823384:1602276-1610907	-0.261663	-1.19886	0.419616	0.644022	20.4695	16.2943	27.818	14.1189	7.59197	10.2533
NCLIV_011490	NCLIV_011490	conserved+hypothetical+protein	FR823384:1613823-1615214	-0.176658	-1.13026	0.523329	0.742009	31.0302	24.7008	42.17	22.7198	12.2168	16.4994
NCLIV_011500	NCLIV_011500	conserved+hypothetical+protein	FR823384:1619047-1621869	0.496292	1.41058	2.77266e-06	3.48616e-05	508.92	405.113	691.622	594.553	319.701	431.772
NCLIV_011510	NCLIV_011510	conserved+hypothetical+protein	FR823384:1624243-1633170	-0.246976	-1.18672	0.268302	0.494673	53.2802	42.4124	72.4078	37.1609	19.982	26.9867
NCLIV_011520	NCLIV_011520	hypothetical+protein	FR823384:1633936-1634070	-1.64226	-3.12154	0.334808	0.555356	0.316536	0.25197	0.430172	0	0	0
NCLIV_011530	NCLIV_011530	conserved+hypothetical+protein	FR823384:1635581-1643357	-0.739353	-1.66943	0.00270991	0.0147267	46.6691	37.1498	63.4233	23.1008	12.4217	16.7761
NCLIV_011540	NCLIV_011540	leucine-rich+protein,+related	FR823384:1646473-1650480	0.677194	1.59903	0.00615197	0.0291974	27.2356	21.6802	37.0131	36.1399	19.433	26.2453
NCLIV_011550	NCLIV_011550	novel+protein+(Zgc:77155),+related	FR823384:1651868-1656075	0.110216	1.07939	0.35179	0.57355	325.773	259.324	442.726	291.214	156.591	211.484
NCLIV_011560	NCLIV_011560	gm12258,+related	FR823384:1658315-1668361	-0.445499	-1.36179	0.0457961	0.145076	52.0299	41.4172	70.7086	31.6084	16.9964	22.9545
NCLIV_011580	NCLIV_011580	putative+helicase	FR823384:1671620-1679667	0.507455	1.42154	0.00342157	0.017953	62.8166	50.0036	85.3677	74.0024	39.7923	53.7415
NCLIV_011590	NCLIV_011590	hypothetical+protein	FR823384:1681528-1686936	-1.45355	-2.73881	3.6099e-06	4.43417e-05	33.8005	26.9061	45.9349	10.142	5.45355	7.36529
NCLIV_011600	NCLIV_011600	conserved+hypothetical+protein	FR823384:1700230-1702054	0	1	1	1	0	0	0	0	0	0
NCLIV_011610	NCLIV_011610	wdr19+protein,+related	FR823384:1704107-1710007	-2.39306	-5.25272	0.172671	0.36411	0.634079	0.504743	0.861712	0	0	0
NCLIV_011620	NCLIV_011620	conserved+hypothetical+protein	FR823384:1716371-1718740	-1.25734	-2.39054	0.00327355	0.0173226	16.8278	13.3954	22.869	5.7575	3.09591	4.18118
NCLIV_011630	NCLIV_011630	hypothetical+protein	FR823384:1722009-1731551	0.0196408	1.01371	0.923042	1	62.8117	49.9998	85.3611	52.7329	28.3554	38.2954
NCLIV_011640	NCLIV_011640	conserved+hypothetical+protein	FR823384:1734133-1740624	0.243859	1.18416	0.122216	0.295378	92.7059	73.7963	125.987	90.9353	48.8975	66.0385
NCLIV_011650	NCLIV_011650	putative+methionine+aminopeptidase	FR823384:1745118-1748931	-0.286664	-1.21982	0.274009	0.501475	33.9668	27.0385	46.1609	23.0371	12.3875	16.7299
NCLIV_011660	NCLIV_011660	putative+C+protein+immunoglobulin-A-binding+beta+antigen	FR823384:1750732-1752016	0.949214	1.93082	0.0928896	0.243696	3.79559	3.02139	5.1582	6.1836	3.32503	4.49061
NCLIV_011670	NCLIV_011670	conserved+hypothetical+protein	FR823384:1755881-1766043	0.300573	1.23163	0.0999937	0.25594	60.1697	47.8966	81.7706	61.3996	33.0156	44.5892
NCLIV_011680	NCLIV_011680	conserved+hypothetical+protein	FR823384:1767289-1768709	0.388577	1.3091	0.325784	0.555356	10.1376	8.06979	13.777	11.0286	5.93028	8.00914
NCLIV_011690	NCLIV_011690	unspecified+product	FR823384:1770332-1772850	0.259064	1.1967	0.0172544	0.0679244	558.35	444.461	758.798	553.37	297.557	401.865
NCLIV_011700	NCLIV_011700	unspecified+product	FR823384:1774397-1776583	0.527511	1.44144	1.80753e-08	3.72291e-07	1976.6	1573.42	2686.2	2359.55	1268.77	1713.54
NCLIV_011710	NCLIV_011710	hypothetical+protein	FR823384:1778843-1781605	0.766391	1.70101	1.48185e-09	3.74532e-08	138.806	110.493	188.637	195.619	105.188	142.061
NCLIV_011720	NCLIV_011720	hypothetical+protein	FR823384:1784133-1801836	1.65948	3.15903	5.32986e-08	9.8365e-07	11.4128	9.08491	15.51	30.1237	16.198	21.8763
NCLIV_011730	NCLIV_011730	unspecified+product	FR823384:1808985-1810607	0.0104261	1.00725	0.921976	1	1206.08	960.071	1639.06	1006.05	540.97	730.607
NCLIV_011740	NCLIV_011740	conserved+hypothetical+protein	FR823384:1813969-1816817	-0.10734	-1.07724	0.526495	0.744462	82.4638	65.6433	112.068	63.3866	34.084	46.0322
NCLIV_011750	NCLIV_011750	hypothetical+protein	FR823384:1821474-1823785	-0.7645	-1.69878	0.0146454	0.059899	26.4027	21.0172	35.8813	12.8204	6.89376	9.31037
NCLIV_011760	NCLIV_011760	hypothetical+protein	FR823384:1826193-1831350	1.9222	3.78999	6.34987e-43	1.47952e-40	84.602	67.3454	114.974	265.877	142.967	193.084
NCLIV_011770	NCLIV_011770	conserved+hypothetical+protein	FR823384:1833959-1839145	0.0125586	1.00874	0.95625	1	44.2749	35.244	60.1696	36.9859	19.8879	26.8597
NCLIV_011780	NCLIV_011780	conserved+hypothetical+protein	FR823384:1842699-1853744	0.182692	1.135	0.26701	0.493022	77.9437	62.0452	105.925	73.2791	39.4034	53.2163
NCLIV_011790	NCLIV_011790	cysteine+desulfurase,+related	FR823384:1857887-1862524	-0.223931	-1.16791	0.35334	0.574783	38.619	30.7417	52.4832	27.3661	14.7152	19.8737
NCLIV_011800	NCLIV_011800	conserved+hypothetical+protein	FR823384:1864797-1865120	-0.0421599	-1.02965	0.789718	0.930913	98.5235	78.4272	133.893	79.2385	42.6079	57.5441
NCLIV_011810	NCLIV_011810	putative+AAA+family+ATPase+domain-containing+protein	FR823384:1868084-1873867	0.9217	1.89435	0.00136521	0.00812892	18.5549	14.7702	25.2161	29.2175	15.7107	21.2181
NCLIV_011820	NCLIV_011820	agap011504-PA,+related	FR823384:1875465-1877220	-0.0639115	-1.0453	0.610972	0.814629	321.666	256.054	437.143	254.835	137.029	185.064
NCLIV_011830	NCLIV_011830	conserved+hypothetical+protein	FR823384:1878903-1881535	0.678745	1.60075	2.93751e-07	4.58203e-06	130.723	104.059	177.653	173.366	93.2219	125.901
NCLIV_011840	NCLIV_011840	hypothetical+protein	FR823384:1883691-1887408	-0.173206	-1.12756	0.261441	0.485869	109.262	86.9752	148.487	80.2336	43.143	58.2667
NCLIV_011850	NCLIV_011850	conserved+hypothetical+protein	FR823384:1890451-1896075	-0.042727	-1.03006	0.721292	0.883225	248.56	197.86	337.792	199.833	107.453	145.121
NCLIV_011860	NCLIV_011860	conserved+hypothetical+protein	FR823384:1897311-1903653	0.119032	1.08601	0.791186	0.93222	8.8497	7.04459	12.0267	7.96915	4.28515	5.78731
NCLIV_011870	NCLIV_011870	hypothetical+protein	FR823384:1907338-1912836	0.00311344	1.00216	0.980779	1	180.215	143.455	244.911	149.566	80.4243	108.617
NCLIV_011880	NCLIV_011880	putative+replication+factor+c+subunit	FR823384:1918478-1922816	0.212103	1.15838	0.223473	0.434702	75.3367	59.97	102.383	72.2887	38.8709	52.4971
NCLIV_011890	NCLIV_011890	putative+oocyst+wall+protein	FR823384:1923672-1926733	1.16166	2.23715	0.306894	0.537767	0.634632	0.505184	0.862465	1.32853	0.714374	0.964798
NCLIV_011900	NCLIV_011900	arginyl-tRNAsynthetase,+related	FR823384:1929458-1937540	-0.218816	-1.16378	0.116576	0.285919	157.432	125.32	213.95	112.012	60.2305	81.3443
NCLIV_011910	NCLIV_011910	testis+cDNA+clone:+QtsA-11516,+similar+to+human+RIO+kinase+3+(yeast)+(RIOK3),+transcript+variant+1,,related	FR823384:1938909-1942795	-0.0248843	-1.0174	0.866085	0.980251	113.358	90.236	154.054	92.2691	49.6147	67.0071
NCLIV_011920	NCLIV_011920	conserved+hypothetical+protein	FR823384:1944076-1948411	0.0527483	1.03724	0.596044	0.807725	860.188	684.732	1169	738.89	397.314	536.592
NCLIV_011930	NCLIV_011930	putative+ribosome+biogenesis+protein+BOP1	FR823384:1959163-1969466	-0.252491	-1.19126	0.0986612	0.253661	129.795	103.32	176.392	90.2122	48.5086	65.5133
NCLIV_011940	NCLIV_011940	hypothetical+protein	FR823384:1972971-1978709	0.517445	1.43142	8.28242e-07	1.17851e-05	622.685	495.673	846.228	738.195	396.94	536.087
NCLIV_011950	NCLIV_011950	conserved+hypothetical+protein	FR823384:1986637-1991952	-0.118899	-1.08591	0.490691	0.709717	86.8198	69.1108	117.988	66.2015	35.5977	48.0764
NCLIV_011960	NCLIV_011960	conserved+hypothetical+protein	FR823384:1995248-1998384	-0.266094	-1.20255	0.0575708	0.168973	153.476	122.171	208.573	105.671	56.821	76.7396
NCLIV_011970	NCLIV_011970	putative+septum+formation+protein+maf	FR823384:2001452-2003978	-0.868999	-1.82639	0.0027171	0.0147551	32.2373	25.6617	43.8104	14.5614	7.82992	10.5747
NCLIV_011980	NCLIV_011980	calmodulin-like+domain+protein+kinase+isoenzyme+gamma,+related	FR823384:2008471-2014154	0.173955	1.12815	0.0794435	0.215315	641.453	510.613	871.734	599.303	322.255	435.222
NCLIV_011990	NCLIV_011990	putative+T-cell+immunomodulatory+protein	FR823384:2018645-2026107	-0.211794	-1.15813	0.19347	0.393269	97.0769	77.2757	131.927	69.3994	37.3172	50.3988
NCLIV_012000	NCLIV_012000	conserved+hypothetical+protein	FR823384:2036644-2039812	-0.242491	-1.18303	0.508706	0.727169	15.2038	12.1026	20.6619	10.6235	5.71242	7.71491
NCLIV_012010	NCLIV_012010	hypothetical+protein	FR823384:2045061-2047382	-0.261261	-1.19853	0.0474668	0.146929	210.844	167.837	286.537	145.666	78.3272	105.785
NCLIV_012020	NCLIV_012020	hypothetical+protein	FR823384:2058210-2061092	1.3812	2.60486	0.305594	0.536499	0.316536	0.25197	0.430172	0.880922	0.473687	0.639738
NCLIV_012030	NCLIV_012030	conserved+hypothetical+protein	FR823384:2066570-2070678	-0.0927437	-1.0664	0.665114	0.85428	47.7069	37.9759	64.8337	37.0404	19.9173	26.8993
NCLIV_012040	NCLIV_012040	putative+dihydroorotate+dehydrogenase	FR823384:2072450-2079019	0.296145	1.22786	0.042621	0.13739	101.181	80.5427	137.505	102.913	55.338	74.7368
NCLIV_012050	NCLIV_012050	putative+ubiquitin+carboxyl-terminal+hydrolase	FR823384:2085130-2104320	0.118988	1.08597	0.368793	0.591719	186.721	148.635	253.754	167.937	90.3027	121.958
NCLIV_012060	NCLIV_012060	conserved+hypothetical+protein	FR823384:2104965-2106558	0.408058	1.3269	0.159709	0.34968	20.9879	16.7069	28.5225	23.1029	12.4228	16.7776
NCLIV_012070	NCLIV_012070	peptidase+C26,+related	FR823384:2107875-2110323	0.338574	1.26451	0.0401891	0.131195	86.6502	68.9758	117.758	90.77	48.8086	65.9184
NCLIV_012080	NCLIV_012080	phenylalanyl-tRNAsynthetase+alpha+chain,+related	FR823384:2113171-2114790	-0.470114	-1.38522	0.0991572	0.254498	29.5784	23.5452	40.197	17.6485	9.48989	12.8166
NCLIV_012090	NCLIV_012090	putative+ATP-dependent+protease+ATP-binding+subunit	FR823384:2122463-2132875	0.191061	1.1416	0.238507	0.45481	98.7542	78.6109	134.207	93.3813	50.2127	67.8148
NCLIV_012100	NCLIV_012100	vacuolar+protein+sorting-associated+protein,related	FR823384:2136197-2169177	0.417013	1.33516	0.00441719	0.0222241	115.175	91.6819	156.522	127.39	68.4997	92.5123
NCLIV_012110	NCLIV_012110	hypothetical+protein	FR823384:2174034-2175254	1.05308	2.07496	0.141101	0.327537	2.24253	1.78511	3.0476	3.98846	2.14466	2.89647
NCLIV_012120	NCLIV_012120	hypothetical+protein	FR823384:2178237-2179022	-0.13079	-1.09489	0.126188	0.301945	2183.97	1738.49	2968.01	1651.87	888.239	1199.61
NCLIV_012130	NCLIV_012130	eukaryotic+translation+initiation+factor+3+subunit+7-like+protein,+related	FR823384:2186510-2192883	-0.256857	-1.19487	0.045932	0.145299	273.367	217.607	371.506	189.444	101.867	137.577
NCLIV_012140	NCLIV_012140	putative+enoyl-CoA+hydratase/isomerase+family+domain-containing+protein	FR823384:2194818-2198138	3.55376	11.7432	0.0152756	0.0617652	0	0	0	1.32649	0.713274	0.963312
NCLIV_012150	NCLIV_012150	putative+CAM+kinase,+CDPK+family	FR823384:2215527-2225859	0.152778	1.11171	0.384318	0.607092	75.047	59.7394	101.989	69.1056	37.1593	50.1854
NCLIV_012160	NCLIV_012160	lateral+signaling+target+protein+2,+related	FR823384:2233179-2239190	0.705803	1.63105	0.000206454	0.00158857	50.4182	40.1342	68.5183	68.1813	36.6623	49.5142
NCLIV_012170	NCLIV_012170	putative+CAM+Kinase,+RAD+family	FR823384:2242222-2257433	0.293446	1.22556	0.314113	0.5458	19.9701	15.8967	27.1393	20.2964	10.9137	14.7395
NCLIV_012180	NCLIV_012180	conserved+hypothetical+protein	FR823384:2263613-2266979	-0.337755	-1.26379	0.0667973	0.190428	82.9922	66.064	112.786	54.3588	29.2296	39.4761
NCLIV_012190	NCLIV_012190	hypothetical+protein	FR823384:2271536-2281579	-0.0597486	-1.04228	0.783767	0.926488	46.1521	36.7382	62.7206	36.6646	19.7152	26.6264
NCLIV_012195	NCLIV_012195	unspecified+product	FR823384:2286862-2288428	-0.804152	-1.74612	1.94033e-06	2.55151e-05	112.262	89.3634	152.564	53.1897	28.601	38.6271
NCLIV_012200	NCLIV_012200	hypothetical+protein	FR823384:2301785-2304604	0.633973	1.55183	2.63117e-07	4.16519e-06	267.11	212.626	363.002	343.342	184.621	249.34
NCLIV_012210	NCLIV_012210	hypothetical+protein	FR823384:2315356-2317245	-1.64645	-3.13063	0.334245	0.555356	0.31746	0.252706	0.431428	0	0	0
NCLIV_012220	NCLIV_012220	conserved+hypothetical+protein	FR823386:7565-9667	-0.199146	-1.14802	0.212252	0.419108	105.643	84.0948	143.569	76.1923	40.9699	55.3319
NCLIV_012230	NCLIV_012230	Ribose-phosphate+pyrophosphokinase,related	FR823386:11748-14528	-0.125286	-1.09072	0.437573	0.6603	101.173	80.5366	137.494	76.8067	41.3003	55.7781
NCLIV_012240	NCLIV_012240	conserved+hypothetical+protein	FR823386:16122-25419	-0.0425221	-1.02991	0.887353	0.991364	23.0028	18.3108	31.2608	18.4938	9.94444	13.4305
NCLIV_012250	NCLIV_012250	conserved+hypothetical+protein	FR823386:29522-32749	-0.0472118	-1.03327	0.780457	0.924398	83.0565	66.1151	112.874	66.5646	35.7929	48.3401
NCLIV_012260	NCLIV_012260	conserved+hypothetical+protein	FR823386:33718-42534	-0.0298616	-1.02091	0.928348	1	18.3466	14.6044	24.933	14.8806	8.00156	10.8065
NCLIV_012270	NCLIV_012270	putative+calmodulin	FR823386:43492-45545	-1.22402	-2.33596	0.000141467	0.0011465	31.3891	24.9866	42.6578	11.0573	5.94567	8.02993
NCLIV_012280	NCLIV_012280	putative+ribosomal+protein+L16	FR823386:50024-51612	-0.0608365	-1.04307	0.817078	0.950411	29.4191	23.4184	39.9806	23.3522	12.5569	16.9587
NCLIV_012290	NCLIV_012290	hypothetical+protein	FR823386:54927-59592	0.0308024	1.02158	0.884739	0.991316	51.3596	40.8836	69.7976	43.4536	23.3657	31.5566
NCLIV_012300	NCLIV_012300	conserved+hypothetical+protein	FR823386:61040-66978	0.170727	1.12563	0.431631	0.65478	45.2241	35.9996	61.4595	42.1727	22.677	30.6264
NCLIV_012310	NCLIV_012310	hypothetical+protein	FR823386:68719-71914	-0.180866	-1.13356	0.495163	0.713556	35.8681	28.552	48.7448	26.189	14.0823	19.0188
NCLIV_012320	NCLIV_012320	conserved+hypothetical+protein	FR823386:73893-77292	0.309133	1.23896	0.194617	0.395063	31.4097	25.0029	42.6858	32.2571	17.3452	23.4256
NCLIV_012330	NCLIV_012330	conserved+hypothetical+protein	FR823386:78382-80942	-0.0834872	-1.05958	0.66894	0.855396	64.3356	51.2128	87.432	50.2768	27.0347	36.5117
NCLIV_012340	NCLIV_012340	conserved+hypothetical+protein	FR823386:82659-92597	-0.123899	-1.08968	0.642602	0.838069	28.4696	22.6625	38.6901	21.6263	11.6288	15.7053
NCLIV_012350	NCLIV_012350	hypothetical+protein	FR823386:93637-99493	-0.134067	-1.09738	0.601549	0.811288	31.0097	24.6845	42.1421	23.3905	12.5775	16.9865
NCLIV_012360	NCLIV_012360	putative+leucine+rich+repeat+protein	FR823386:101046-108999	0.379166	1.30059	0.0964477	0.249606	39.4631	31.4136	53.6303	42.5438	22.8765	30.8959
NCLIV_012370	NCLIV_012370	putative+proline-rich+protein	FR823386:113323-115086	0.548764	1.46283	0.715683	0.880067	0.31746	0.252706	0.431428	0.441952	0.237645	0.320951
NCLIV_012380	NCLIV_012380	Methylosome+subunit+pICln,+related	FR823386:117697-120348	0.16518	1.12131	0.347763	0.568748	74.7929	59.5371	101.644	69.4674	37.3538	50.4481
NCLIV_012390	NCLIV_012390	conserved+hypothetical+protein	FR823386:121950-123797	0.0605748	1.04288	0.806206	0.942171	36.1982	28.8147	49.1933	31.2677	16.8132	22.707
NCLIV_012400	NCLIV_012400	Articulin+family+protein,+related	FR823386:127257-128645	-0.831216	-1.77918	5.61006e-11	1.74286e-09	325.183	258.854	441.923	151.305	81.3592	109.88
NCLIV_012410	NCLIV_012410	hypothetical+protein	FR823386:133312-134962	1.05028	2.07093	0.293346	0.523751	0.952425	0.758155	1.29435	1.76613	0.94968	1.28259
NCLIV_012420	NCLIV_012420	Flagellar+associated+protein,+related	FR823386:138998-150855	0.713476	1.63975	0.228239	0.441325	3.81694	3.03838	5.18722	5.26366	2.83036	3.82254
NCLIV_012430	NCLIV_012430	putative+ribosomal+protein+L15	FR823386:151904-159116	-0.221318	-1.1658	0.184729	0.379955	89.602	71.3255	121.769	63.6326	34.2164	46.2109
NCLIV_012440	NCLIV_012440	conserved+hypothetical+protein	FR823386:165459-168266	1.11301	2.16296	8.65551e-13	3.37882e-11	68.4881	54.5183	93.0752	122.823	66.0443	89.1961
NCLIV_012450	NCLIV_012450	conserved+hypothetical+protein	FR823386:171450-172679	1.20829	2.31064	5.23423e-14	2.34808e-12	60.1634	47.8916	81.7621	115.285	61.9909	83.7218
NCLIV_012460	NCLIV_012460	Lysyl-tRNA+synthetase,+related	FR823386:178067-192255	-1.80089	-3.48435	2.91686e-13	1.19495e-11	69.3076	55.1707	94.189	16.3842	8.81006	11.8984
NCLIV_012470	NCLIV_012470	putative+FAD-depdendent+monooxygenase	FR823386:195052-204111	0.0272251	1.01905	0.843106	0.96488	141.773	112.855	192.67	119.647	64.3363	86.8894
NCLIV_012480	NCLIV_012480	putative+200+kDa+antigen+p200	FR823386:207584-211126	0.331153	1.25802	0.0550466	0.163192	75.8757	60.399	103.115	79.0815	42.5235	57.4301
NCLIV_012490	NCLIV_012490	conserved+hypothetical+protein	FR823386:212941-216813	0.468957	1.38411	0.000250983	0.00186759	285.685	227.412	388.246	327.512	176.109	237.843
NCLIV_012500	NCLIV_012500	conserved+hypothetical+protein	FR823386:219678-222068	0.421091	1.33894	0.00116102	0.00705504	149.109	118.694	202.638	165.378	88.9267	120.1
NCLIV_012510	NCLIV_012510	hypothetical+protein	FR823386:225683-227017	0.0907358	1.06491	0.321338	0.553708	1330.25	1058.92	1807.82	1173.16	630.827	851.963
NCLIV_012520	NCLIV_012520	putative+3'5'-cyclic+nucleotide+phosphodiesterase	FR823386:230072-239057	1.18023	2.26613	3.51561e-09	8.14049e-08	41.6269	33.1361	56.5709	78.2765	42.0906	56.8455
NCLIV_012530	NCLIV_012530	conserved+hypothetical+protein	FR823386:242600-247369	-0.598098	-1.51372	0.0597058	0.17437	25.2461	20.0966	34.3095	13.7691	7.4039	9.99933
NCLIV_012540	NCLIV_012540	hypothetical+protein	FR823386:250573-254720	-1.54246	-2.9129	1.138e-05	0.000124413	28.3952	22.6033	38.589	7.99093	4.29686	5.80313
NCLIV_012550	NCLIV_012550	putative+ribonuclease+H	FR823386:257849-260071	-0.0529693	-1.0374	0.849021	0.968116	27.1601	21.6201	36.9105	21.6777	11.6565	15.7426
NCLIV_012560	NCLIV_012560	putative+SNF7+family+domain-containing+protein	FR823386:262989-266395	-1.60996	-3.05243	0.00241734	0.0133509	11.7374	9.34327	15.9511	3.10107	1.6675	2.25204
NCLIV_012570	NCLIV_012570	putative+RNase+H	FR823386:268805-275056	0.260406	1.19782	0.0623675	0.179958	204.354	162.671	277.717	202.738	109.016	147.231
NCLIV_012580	NCLIV_012580	conserved+hypothetical+protein	FR823386:277708-282319	0.470381	1.38548	0.0568741	0.167345	26.9648	21.4647	36.6452	30.9861	16.6618	22.5025
NCLIV_012590	NCLIV_012590	conserved+hypothetical+protein	FR823386:282947-283831	0.0628402	1.04452	0.799234	0.938439	33.7716	26.8831	45.8956	29.2186	15.7113	21.2189
NCLIV_012600	NCLIV_012600	hypothetical+protein	FR823386:287179-290357	0.0495659	1.03495	0.694925	0.873902	214.294	170.584	291.226	183.674	98.7645	133.386
NCLIV_012610	NCLIV_012610	conserved+hypothetical+protein	FR823386:293561-295384	0.37713	1.29876	0.00592566	0.0282131	142.966	113.804	194.29	153.805	82.7036	111.695
NCLIV_012620	NCLIV_012620	unspecified+product	FR823386:298969-310730	0.346474	1.27145	0.00479514	0.0237559	199.362	158.697	270.933	209.951	112.894	152.469
NCLIV_012630	NCLIV_012630	Os03g0726500+protein,+related	FR823386:322512-326595	-2.88265	-7.37506	0.0952409	0.24761	0.950617	0.756716	1.29189	0	0	0
NCLIV_012640	NCLIV_012640	conserved+hypothetical+protein	FR823386:329487-335045	0.256944	1.19494	0.064889	0.186153	142.976	113.813	194.304	141.512	76.0932	102.768
NCLIV_012650	NCLIV_012650	conserved+hypothetical+protein	FR823386:336631-341832	-2.88417	-7.3828	0.0951025	0.24761	0.951617	0.757512	1.29325	0	0	0
NCLIV_012660	NCLIV_012660	conserved+hypothetical+protein	FR823386:344732-348257	0.198613	1.14759	0.138004	0.322153	162.087	129.025	220.276	154.061	82.8411	111.881
NCLIV_012670	NCLIV_012670	putative+protein+phosphatase+2C	FR823386:351401-358470	0.284088	1.21764	0.113373	0.280541	65.7258	52.3195	89.3214	66.3035	35.6525	48.1505
NCLIV_012675	NCLIV_012675	SRS+domain-containing+protein	FR823386:361084-362707	0	1	1	1	0	0	0	0	0	0
NCLIV_012680	NCLIV_012680	conserved+hypothetical+protein	FR823386:367750-385549	-0.0931131	-1.06667	0.523632	0.742009	136.189	108.41	185.08	105.726	56.8506	76.7795
NCLIV_012690	NCLIV_012690	conserved+hypothetical+protein	FR823386:386881-390955	-0.749091	-1.68073	0.467762	0.68731	1.88863	1.5034	2.56665	0.880485	0.473452	0.63942
NCLIV_012700	NCLIV_012700	putative+TCP-1/cpn60+family+chaperonin	FR823386:395375-400763	-0.422248	-1.34001	0.00361403	0.0187648	149.818	119.259	203.603	92.5576	49.7698	67.2166
NCLIV_012701	NCLIV_012701	SRS+domain-containing+protein	FR823386:405950-407227	0	1	1	1	0	0	0	0	0	0
NCLIV_012710	NCLIV_012710	SRS+domain-containing+protein	FR823386:414377-415618	-0.919522	-1.89149	0.280885	0.510178	3.16254	2.51747	4.29789	1.3262	0.713122	0.963107
NCLIV_012711	NCLIV_012711	SRS+domain-containing+protein	FR823386:417458-418639	0	1	1	1	0	0	0	0	0	0
NCLIV_012712	NCLIV_012712	SRS+domain-containing+protein	FR823386:420709-421899	0.631987	1.5497	0.0805915	0.217332	11.7429	9.34769	15.9587	15.1378	8.13984	10.9933
NCLIV_012720	NCLIV_012720	NAD(P)++transhydrogenase,+beta+subunit,+related	FR823386:434928-440122	-3.2487	-9.50509	0.0541994	0.161956	1.26815	1.00948	1.72341	0	0	0
NCLIV_012730	NCLIV_012730	Os10g0412100+protein,+related	FR823386:441794-451361	-1.42386	-2.68302	0.00573432	0.0274953	11.6747	9.29332	15.8658	3.52612	1.89605	2.56072
NCLIV_012740	NCLIV_012740	putative+DNA+repair+protein	FR823386:454481-457874	-0.468018	-1.38321	0.343528	0.564421	8.91103	7.09341	12.1101	5.30123	2.85056	3.84983
NCLIV_012750	NCLIV_012750	conserved+hypothetical+protein	FR823386:460206-462236	2.19238	4.57058	0.160723	0.34968	0	0	0	0.441081	0.237177	0.320319
NCLIV_012760	NCLIV_012760	conserved+hypothetical+protein	FR823386:470308-472389	-0.598743	-1.5144	7.70808e-05	0.00067534	130.119	103.578	176.832	71.1134	38.2389	51.6435
NCLIV_012770	NCLIV_012770	putative+Tyrosine+kinase-like+(TKL)+protein	FR823386:476204-490701	0.452501	1.36841	6.43595e-05	0.000574688	253.162	201.523	344.047	286.938	154.291	208.378
NCLIV_012780	NCLIV_012780	conserved+hypothetical+protein	FR823386:493880-497830	-0.110539	-1.07963	0.455992	0.677941	120.412	95.8513	163.64	92.3536	49.6601	67.0685
NCLIV_012790	NCLIV_012790	conserved+hypothetical+protein	FR823386:499358-501757	-0.164789	-1.121	0.506656	0.725072	39.4958	31.4397	53.6747	29.1639	15.6819	21.1792
NCLIV_012800	NCLIV_012800	F14N23.23,+related	FR823386:505938-509848	0.0278278	1.01948	0.881856	0.989804	64.5885	51.4141	87.7758	54.533	29.3233	39.6026
NCLIV_012810	NCLIV_012810	hypothetical+protein	FR823386:512926-517343	0.330413	1.25737	0.122848	0.296043	41.7132	33.2048	56.6883	43.4672	23.3731	31.5665
NCLIV_012820	NCLIV_012820	GTP-binding+protein+TypA,+related	FR823386:519577-539369	0.254964	1.19331	0.313699	0.545462	32.833	26.1359	44.62	32.4701	17.4597	23.5802
NCLIV_012830	NCLIV_012830	putative+MORN+repeat-containing+protein	FR823386:542194-543567	0.0544326	1.03845	0.719433	0.881528	100.067	79.6555	135.99	86.0604	46.2761	62.4982
NCLIV_012840	NCLIV_012840	hypothetical+protein	FR823386:546987-549403	0	1	1	1	0	0	0	0	0	0
NCLIV_012850	NCLIV_012850	hypothetical+protein	FR823386:552783-556132	0.566978	1.48142	0.0279859	0.0993159	27.8787	22.1921	37.8871	34.2605	18.4225	24.8804
NCLIV_012860	NCLIV_012860	Leucyl-tRNA+synthetase+2,+related	FR823386:559621-569957	-0.197188	-1.14646	0.159373	0.34968	161.856	128.842	219.962	116.901	62.8597	84.8951
NCLIV_012870	NCLIV_012870	putative+EF+hand+domain-containing+protein	FR823386:572259-579082	0.171282	1.12606	0.210545	0.417063	239.142	190.363	324.994	223.025	119.925	161.964
NCLIV_012880	NCLIV_012880	conserved+hypothetical+protein	FR823386:582393-595468	-0.262774	-1.19978	0.253624	0.47537	47.547	37.8487	64.6164	32.7985	17.6363	23.8187
NCLIV_012890	NCLIV_012890	hypothetical+protein	FR823386:597154-624461	0.22834	1.17149	0.0462918	0.146127	335.432	267.013	455.852	325.444	174.997	236.342
NCLIV_012900	NCLIV_012900	At4g37010,+related	FR823386:631099-633426	0.123627	1.08947	0.572953	0.785139	42.5788	33.8939	57.8646	38.4275	20.6631	27.9065
NCLIV_012905	NCLIV_012905	unspecified+product	FR823386:635698-638925	-1.31808	-2.49334	4.97693e-05	0.000455312	36.2883	28.8865	49.3158	11.9789	6.44127	8.69925
NCLIV_012910	NCLIV_012910	Novel+protein+(Zgc:63649),+related	FR823386:642824-661414	0.203648	1.15161	0.106208	0.268344	240.765	191.655	327.2	229.636	123.479	166.765
NCLIV_012920	NCLIV_012920	unspecified+product	FR823386:663772-664947	0.288536	1.2214	0.00749547	0.0344977	685.127	545.379	931.087	693.028	372.653	503.286
NCLIV_012930	NCLIV_012930	hypothetical+protein	FR823386:669777-673695	0.356029	1.2799	0.226681	0.439567	20.5312	16.3434	27.9019	21.7951	11.7196	15.8279
NCLIV_012940	NCLIV_012940	conserved+hypothetical+protein	FR823386:674657-690625	-0.596687	-1.51224	0.0104829	0.0457614	50.1784	39.9433	68.1925	27.4367	14.7532	19.9249
NCLIV_012950	NCLIV_012950	putative+ubiquitin+family+domain-containing+protein	FR823386:695796-701971	-0.324103	-1.25189	0.174806	0.36611	59.8696	47.6577	81.3628	39.5807	21.2832	28.744
NCLIV_012960	NCLIV_012960	conserved+hypothetical+protein	FR823386:703753-709093	0.26971	1.20557	0.0837826	0.224061	88.7978	70.6853	120.676	88.6797	47.6846	64.4004
NCLIV_012970	NCLIV_012970	conserved+hypothetical+protein	FR823386:710394-713208	0.0339425	1.02381	0.797058	0.9366	168.446	134.087	228.918	142.822	76.7977	103.719
NCLIV_012980	NCLIV_012980	conserved+hypothetical+protein	FR823386:716114-719326	-0.11507	-1.08303	0.49326	0.712327	98.7737	78.6264	134.233	75.5173	40.607	54.8417
NCLIV_012990	NCLIV_012990	hypothetical+protein	FR823386:722031-748637	-0.188862	-1.13986	0.146302	0.335941	257.627	205.078	350.115	187.158	100.638	135.917
NCLIV_0130	NCLIV_0130	ADP-ribosylation+factor+domain-containing+protein	FR823386:780569-783689	-0.127045	-1.09205	0.601413	0.811288	38.5523	30.6886	52.3925	29.2246	15.7146	21.2233
NCLIV_013000	NCLIV_013000	conserved+hypothetical+protein	FR823386:751697-755392	0.112384	1.08101	0.428202	0.651434	130.716	104.053	177.643	117.031	62.9298	84.9899
NCLIV_013010	NCLIV_013010	Rhomboid+family+1+(Predicted),+related	FR823386:757751-759179	1.8088	3.50351	0.0397981	0.13049	0.955479	0.760586	1.2985	3.08375	1.65818	2.23946
NCLIV_013020	NCLIV_013020	hypothetical+protein	FR823386:759931-761270	-0.467286	-1.38251	0.0210419	0.0797198	63.3152	50.4006	86.0454	37.8928	20.3756	27.5183
NCLIV_013030	NCLIV_013030	Nitrogen-fixing+NifU,+C-terminal,+related	FR823386:761832-763300	-0.205401	-1.15301	0.381289	0.603582	43.4712	34.6042	59.0774	31.2052	16.7795	22.6616
NCLIV_013040	NCLIV_013040	hypothetical+protein	FR823386:764470-767325	0.55296	1.46709	0.714173	0.880067	0.316536	0.25197	0.430172	0.441952	0.237645	0.320951
NCLIV_013050	NCLIV_013050	conserved+hypothetical+protein	FR823386:769042-778459	-0.147898	-1.10795	0.486626	0.706029	54.9708	43.7582	74.7052	41.0757	22.0871	29.8297
NCLIV_013070	NCLIV_013070	conserved+hypothetical+protein	FR823386:786827-790599	-0.146346	-1.10676	0.486526	0.706021	57.4001	45.692	78.0068	42.9387	23.0889	31.1827
NCLIV_013080	NCLIV_013080	hypothetical+protein	FR823386:793376-799053	-0.397592	-1.31731	0.625244	0.827004	2.85375	2.27166	3.87825	1.7645	0.948803	1.28141
NCLIV_013090	NCLIV_013090	putative+protein+kinase+(incomplete+catalytic+triad)	FR823386:799856-802032	0.552257	1.46638	0.714428	0.880067	0.317124	0.252439	0.430971	0.442555	0.23797	0.32139
NCLIV_013100	NCLIV_013100	putative+KH+domain-containing+protein	FR823386:806217-808670	-0.0980946	-1.07036	0.393113	0.617713	381.582	303.749	518.57	295.223	158.746	214.395
NCLIV_013110	NCLIV_013110	conserved+hypothetical+protein	FR823386:815399-823389	0.0932809	1.06679	0.53101	0.747774	113.083	90.0166	153.679	99.9118	53.7243	72.5573
NCLIV_013120	NCLIV_013120	putative+activator+1+36+kDa	FR823386:826073-834785	-1.02541	-2.03554	7.82235e-05	0.000684547	44.8037	35.6649	60.8882	18.1649	9.76759	13.1916
NCLIV_013130	NCLIV_013130	conserved+hypothetical+protein	FR823386:836637-847367	-0.0739967	-1.05263	0.761906	0.913747	39.0645	31.0963	53.0886	30.7267	16.5223	22.3142
NCLIV_013140	NCLIV_013140	conserved+hypothetical+protein	FR823386:851769-856852	0.345953	1.27099	0.0167992	0.0665543	108.925	86.7073	148.029	114.685	61.6679	83.2856
NCLIV_013150	NCLIV_013150	conserved+hypothetical+protein	FR823386:860544-861968	-0.421157	-1.339	0.000283115	0.00206952	341.133	271.551	463.6	210.951	113.432	153.196
NCLIV_013160	NCLIV_013160	conserved+hypothetical+protein	FR823386:865769-874619	-0.335876	-1.26214	0.0278341	0.0988716	130.243	103.677	177.001	85.4324	45.9385	62.0422
NCLIV_013170	NCLIV_013170	putative+WD+domain-containing+protein	FR823386:880502-893450	0.43112	1.34828	0.000118828	0.000988819	338.224	269.235	459.646	377.693	203.092	274.286
NCLIV_013180	NCLIV_013180	GM04207p,+related	FR823386:897833-903249	-0.132956	-1.09654	0.135133	0.317134	1342.02	1068.28	1823.81	1013.53	544.992	736.038
NCLIV_013190	NCLIV_013190	hypothetical+protein	FR823386:905218-908474	0.857508	1.81191	0.0386377	0.127527	7.93931	6.3199	10.7895	12.0129	6.45954	8.72392
NCLIV_013200	NCLIV_013200	hypothetical+protein	FR823386:918209-920425	-0.244384	-1.18459	0.327279	0.555356	34.7879	27.6921	47.2768	24.3007	13.0669	17.6475
NCLIV_013210	NCLIV_013210	hypothetical+protein	FR823386:922403-930104	0.0602904	1.04268	0.712921	0.880067	83.676	66.6082	113.716	72.2583	38.8545	52.475
NCLIV_013220	NCLIV_013220	putative+YGGT+family+domain+protein	FR823386:931184-932509	-0.632294	-1.55003	0.207537	0.41286	9.18469	7.31125	12.482	4.86318	2.61501	3.53171
NCLIV_013230	NCLIV_013230	conserved+hypothetical+protein	FR823386:934239-939161	-0.298309	-1.2297	0.257676	0.480909	32.8506	26.1499	44.644	22.0998	11.8834	16.0492
NCLIV_013240	NCLIV_013240	conserved+hypothetical+protein	FR823386:942496-944200	1.40559	2.64927	5.4011e-10	1.45908e-08	25.8702	20.5933	35.1576	56.9608	30.6288	41.3657
NCLIV_013250	NCLIV_013250	GK19899,+related	FR823386:949457-961627	2.55276	5.86755	3.37279e-127	2.79417e-124	238.18	189.598	323.687	1157.96	622.654	840.924
NCLIV_013260	NCLIV_013260	conserved+hypothetical+protein	FR823386:967172-967744	0.0924837	1.0662	0.349879	0.57108	720.664	573.667	979.381	636.331	342.166	462.112
NCLIV_013270	NCLIV_013270	conserved+hypothetical+protein	FR823386:969545-970540	2.19522	4.57958	0.160461	0.34968	0	0	0	0.441952	0.237645	0.320951
NCLIV_013280	NCLIV_013280	conserved+hypothetical+protein	FR823386:973515-990512	0.39229	1.31247	0.0140494	0.0580347	87.8189	69.9061	119.346	95.491	51.3471	69.3469
NCLIV_013290	NCLIV_013290	conserved+hypothetical+protein	FR823386:991906-999784	-0.0772282	-1.05499	0.707415	0.880067	55.8478	44.4563	75.8971	43.8331	23.5698	31.8322
NCLIV_013300	NCLIV_013300	conserved+hypothetical+protein	FR823386:1004515-1013747	0.630859	1.54849	1.29537e-07	2.17528e-06	232.396	184.994	315.827	298.086	160.286	216.474
NCLIV_013310	NCLIV_013310	hypothetical+protein	FR823386:1016023-1020349	1.15984	2.23433	0.000484305	0.00333981	11.4288	9.09763	15.5318	21.2995	11.4531	15.468
NCLIV_013320	NCLIV_013320	hypothetical+protein	FR823386:1021549-1022981	0.00848137	1.0059	0.92561	1	1767.32	1406.83	2401.79	1472.22	791.638	1069.15
NCLIV_013330	NCLIV_013330	hypothetical+protein	FR823386:1025015-1029346	-1.91106	-3.76086	0.0291768	0.10241	4.41177	3.51188	5.99559	0.880981	0.473719	0.63978
NCLIV_013340	NCLIV_013340	conserved+hypothetical+protein	FR823386:1032456-1041848	-0.336114	-1.26235	0.0636222	0.183083	80.3541	63.9639	109.201	52.6893	28.3319	38.2637
NCLIV_013350	NCLIV_013350	hypothetical+protein	FR823386:1044456-1049094	-0.0655245	-1.04647	0.778942	0.923785	43.3122	34.4776	58.8613	34.2689	18.427	24.8866
NCLIV_013360	NCLIV_013360	putative+plectin	FR823386:1052290-1064829	0.135904	1.09878	0.237249	0.453571	317.408	252.665	431.357	288.837	155.312	209.757
NCLIV_013370	NCLIV_013370	hypothetical+protein	FR823386:1068607-1072148	0.643071	1.56165	0.000130292	0.00106989	68.2673	54.3425	92.7752	88.3578	47.5115	64.1666
NCLIV_013380	NCLIV_013380	hypothetical+protein	FR823386:1076276-1078041	-0.206992	-1.15428	0.204415	0.407518	96.7423	77.0094	131.473	69.392	37.3133	50.3934
NCLIV_013390	NCLIV_013390	conserved+hypothetical+protein	FR823386:1080092-1088196	0.447381	1.36356	0.0231011	0.0855713	48.2428	38.4025	65.5619	54.5215	29.3172	39.5943
NCLIV_013400	NCLIV_013400	conserved+hypothetical+protein	FR823386:1095773-1102141	1.00023	2.00032	1.67604e-23	1.68873e-21	522.378	415.826	709.911	865.468	465.377	628.514
NCLIV_013410	NCLIV_013410	putative+MmgE/PrpD+family+domain+containing+protein	FR823386:1112524-1118205	-0.0744622	-1.05297	0.771563	0.918891	33.3456	26.5439	45.3166	26.2182	14.098	19.04
NCLIV_013420	NCLIV_013420	Anaphase-promoting+complex+subunit+11,+related	FR823386:1119062-1120015	0.136412	1.09917	0.553595	0.767498	42.3306	33.6962	57.5272	38.5433	20.7254	27.9907
NCLIV_013430	NCLIV_013430	conserved+hypothetical+protein	FR823386:1122313-1124862	1.00229	2.00318	0.269572	0.496336	1.25899	1.00219	1.71097	2.21067	1.18872	1.60542
NCLIV_013440	NCLIV_013440	putative+WD+repeat-containing+protein	FR823386:1126900-1131249	-0.462383	-1.37782	0.00851771	0.0384199	90.5827	72.1062	123.102	54.4119	29.2582	39.5146
NCLIV_013450	NCLIV_013450	conserved+hypothetical+protein	FR823386:1132545-1144565	0.474576	1.38951	0.122496	0.295766	17.9934	14.3232	24.453	20.7527	11.1591	15.0709
NCLIV_013460	NCLIV_013460	hypothetical+protein	FR823386:1148280-1149554	-0.35124	-1.27566	0.00538801	0.0260694	231.575	184.34	314.711	150.309	80.8238	109.157
NCLIV_013470	NCLIV_013470	Spermine/spermidine+synthase+family+protein,related	FR823386:1151692-1161108	0.0326971	1.02292	0.836059	0.962187	95.5561	76.0651	129.861	80.9503	43.5283	58.7872
NCLIV_013480	NCLIV_013480	hypothetical+protein	FR823386:1162623-1164142	1.20248	2.30136	0.042179	0.136437	3.1674	2.52133	4.3045	6.19688	3.33217	4.50026
NCLIV_013490	NCLIV_013490	hypothetical+protein	FR823386:1166084-1170530	-0.0224458	-1.01568	0.936818	1	26.3587	20.9822	35.8215	21.4897	11.5554	15.6061
NCLIV_013500	NCLIV_013500	conserved+hypothetical+protein	FR823386:1172498-1174273	0	1	1	1	0	0	0	0	0	0
NCLIV_013510	NCLIV_013510	DEAD/DEAH+box+helicase+family+protein,+related	FR823386:1176110-1187378	-0.0133752	-1.00931	0.940064	1	73.4619	58.4776	99.8347	60.2739	32.4103	43.7717
NCLIV_013520	NCLIV_013520	putative+molybdopterin+synthase	FR823386:1190583-1196025	0.697816	1.62205	2.72184e-07	4.2905e-06	123.986	98.6962	168.497	166.625	89.5969	121.005
NCLIV_013530	NCLIV_013530	conserved+hypothetical+protein	FR823386:1200902-1212700	0.11461	1.08268	0.546958	0.762408	60.4976	48.1577	82.2162	54.2528	29.1727	39.3991
NCLIV_013540	NCLIV_013540	hypothetical+protein	FR823386:1214720-1217189	0.0809141	1.05769	0.574025	0.786462	130.797	104.118	177.753	114.574	61.6081	83.2048
NCLIV_013550	NCLIV_013550	hypothetical+protein	FR823386:1220896-1222416	-0.289819	-1.22249	0.239504	0.456245	40.0989	31.9198	54.4944	27.141	14.5942	19.7102
NCLIV_013560	NCLIV_013560	conserved+hypothetical+protein	FR823386:1226404-1229013	1.05305	2.07492	0.291474	0.521784	0.950645	0.756738	1.29193	1.76624	0.949735	1.28266
NCLIV_013570	NCLIV_013570	conserved+hypothetical+protein	FR823386:1230280-1232778	-0.317033	-1.24577	0.0617459	0.178579	88.4693	70.4239	120.23	58.7867	31.6106	42.6917
NCLIV_013580	NCLIV_013580	hypothetical+protein	FR823386:1234728-1245099	0.160007	1.11729	0.856585	0.974028	1.907	1.51802	2.59161	1.77855	0.956359	1.29161
NCLIV_013590	NCLIV_013590	conserved+hypothetical+protein	FR823386:1251054-1251506	2.46208	5.51009	0.00190309	0.0108151	0.949789	0.756057	1.29076	4.88947	2.62915	3.5508
NCLIV_013600	NCLIV_013600	conserved+hypothetical+protein	FR823386:1252559-1257363	2.19238	4.57058	0.160723	0.34968	0	0	0	0.441081	0.237177	0.320319
NCLIV_013610	NCLIV_013610	Ubiquitin+carboxyl-terminal+hydrolase,+related	FR823386:1258919-1263221	-0.209517	-1.1563	0.264936	0.490774	75.0239	59.7209	101.957	53.7165	28.8843	39.0096
NCLIV_013620	NCLIV_013620	Ubiquitin+carboxyl-terminal+hydrolase,+related	FR823386:1264413-1267995	0.0923151	1.06608	0.712273	0.880067	32.8088	26.1167	44.5871	28.975	15.5804	21.0421
NCLIV_013630	NCLIV_013630	conserved+hypothetical+protein	FR823386:1269203-1270003	0.357345	1.28107	0.553883	0.767611	4.11781	3.27789	5.59611	4.40358	2.36788	3.19794
NCLIV_013640	NCLIV_013640	hypothetical+protein	FR823386:1273824-1281561	-0.216216	-1.16168	0.238296	0.454691	109.199	86.925	148.401	77.8299	41.8504	56.5211
NCLIV_013660	NCLIV_013660	putative+regulator+of+chromosome+condensation	FR823386:1285242-1291404	-0.295337	-1.22717	0.170489	0.36411	53.6037	42.6699	72.8473	36.1516	19.4393	26.2538
NCLIV_013670	NCLIV_013670	conserved+hypothetical+protein	FR823386:1294150-1296956	-0.39949	-1.31904	0.119268	0.290417	36.1577	28.7825	49.1383	22.6706	12.1904	16.4637
NCLIV_013680	NCLIV_013680	conserved+hypothetical+protein	FR823386:1298609-1307357	-0.438424	-1.35512	0.0130767	0.0545913	86.8544	69.1383	118.035	53.0462	28.5238	38.5228
NCLIV_013690	NCLIV_013690	GF22565,+related	FR823386:1312128-1317011	-0.150406	-1.10988	0.480006	0.699584	49.7609	39.6109	67.625	37.1169	19.9584	26.9548
NCLIV_0137	NCLIV_0137	sulfate+transporter+family+domain-containing+protein	FR823386:1363264-1365048	0.563362	1.47771	0.033421	0.113525	23.9822	19.0905	32.5918	29.4057	15.8119	21.3548
NCLIV_013700	NCLIV_013700	putative+CHCH+domain-containing+protein	FR823386:1318519-1320820	0.295755	1.22753	0.00618419	0.0293316	694.699	552.999	944.096	706.236	379.755	512.878
NCLIV_013710	NCLIV_013710	conserved+hypothetical+protein	FR823386:1324307-1326343	-0.234257	-1.1763	0.213651	0.420646	72.816	57.9634	98.9569	51.2461	27.5559	37.2156
NCLIV_013720	NCLIV_013720	putative+NOL1/NOP2/sun+family+domain-containing+protein	FR823386:1329798-1332602	0.217471	1.16269	0.308808	0.539688	49.7545	39.6059	67.6163	47.9291	25.7723	34.8067
NCLIV_013730	NCLIV_013730	conserved+hypothetical+protein	FR823386:1345295-1346774	-0.654435	-1.574	0.000491475	0.00337736	85.227	67.8429	115.823	44.7956	24.0873	32.5311
NCLIV_013740	NCLIV_013740	conserved+hypothetical+protein	FR823386:1347771-1353242	0.25876	1.19645	0.228419	0.441558	49.1263	39.1058	66.7626	48.7012	26.1875	35.3675
NCLIV_013750	NCLIV_013750	conserved+hypothetical+protein	FR823386:1355438-1356130	2.19238	4.57058	0.160723	0.34968	0	0	0	0.441081	0.237177	0.320319
NCLIV_013770	NCLIV_013770	conserved+hypothetical+protein	FR823386:1370136-1374018	0.396022	1.31588	0.0288312	0.101447	59.3048	47.2081	80.5952	64.6657	34.7719	46.9611
NCLIV_013780	NCLIV_013780	hypothetical+protein	FR823386:1376572-1379004	-0.864914	-1.82123	1.09385e-09	2.80266e-08	187.954	149.616	255.429	85.4099	45.9264	62.0258
NCLIV_013790	NCLIV_013790	hypothetical+protein	FR823386:1386876-1397701	0.317776	1.24641	0.0393581	0.129446	101.846	81.0719	138.408	105.156	56.5443	76.3659
NCLIV_013800	NCLIV_013800	conserved+hypothetical+protein	FR823386:1399886-1401810	-0.628052	-1.54548	0.017162	0.067632	40.3801	32.1436	54.8766	21.5949	11.6119	15.6825
NCLIV_013810	NCLIV_013810	hypothetical+protein	FR823386:1405480-1414837	-0.0182851	-1.01275	0.903939	0.997189	106.669	84.9113	144.963	87.2236	46.9016	63.3429
NCLIV_013820	NCLIV_013820	hypothetical+protein	FR823386:1420237-1426393	0.408387	1.3272	0.237186	0.453568	15.1221	12.0376	20.551	16.6641	8.96055	12.1017
NCLIV_013830	NCLIV_013830	Dynein+heavy+chain+family+protein,+related	FR823386:1428715-1464777	0.479828	1.39458	0.00451669	0.0226777	72.029	57.3369	97.8873	83.2359	44.7574	60.447
NCLIV_013840	NCLIV_013840	hypothetical+protein	FR823386:1471401-1477026	0.00605554	1.00421	0.96293	1	185.292	147.497	251.812	154.094	82.8588	111.905
NCLIV_013850	NCLIV_013850	conserved+hypothetical+protein	FR823386:1477927-1481616	0.160706	1.11783	0.561467	0.773521	28.7755	22.9061	39.1059	26.6557	14.3332	19.3578
NCLIV_013860	NCLIV_013860	F2J6.5+protein,+related	FR823386:1486541-1492281	0.200208	1.14886	0.195413	0.396462	125.813	100.15	170.979	119.721	64.3761	86.9432
NCLIV_013870	NCLIV_013870	putative+pinin/SDK/memA/+domain-containing+protein	FR823386:1495796-1499617	-0.277964	-1.21248	0.257433	0.480845	37.4618	29.8205	50.9105	25.5656	13.7471	18.5661
NCLIV_013880	NCLIV_013880	hypothetical+protein	FR823386:1501745-1506972	-3.52686	-11.5263	0.0324031	0.11082	1.57082	1.25042	2.13475	0	0	0
NCLIV_013890	NCLIV_013890	conserved+hypothetical+protein	FR823386:1510834-1511304	0.324118	1.2519	0.179659	0.372791	36.2728	28.8741	49.2947	37.6369	20.238	27.3325
NCLIV_013900	NCLIV_013900	conserved+hypothetical+protein	FR823386:1513974-1515353	-1.00938	-2.01304	0.0030473	0.016229	23.7389	18.8968	32.2612	9.70386	5.21793	7.04707
NCLIV_013910	NCLIV_013910	Pdcd4-prov+protein,+related	FR823386:1517759-1524130	-0.456411	-1.37212	0.00119513	0.00724462	178.679	142.233	242.825	107.808	57.97	78.2914
NCLIV_013920	NCLIV_013920	unspecified+product	FR823386:1527995-1530286	-0.9041	-1.87138	0.231276	0.445465	4.11771	3.2778	5.59596	1.76481	0.948969	1.28163
NCLIV_013930	NCLIV_013930	putative+signal+recognition+particle+19+kDa+protein	FR823386:1533632-1535357	0.323691	1.25153	0.0274873	0.0977792	110.172	87.6995	149.723	114.218	61.4168	82.9464
NCLIV_013940	NCLIV_013940	Heat+shock+protein+17.4,+related	FR823386:1540341-1541168	-0.0612761	-1.04339	0.738288	0.897112	74.2825	59.1308	100.95	58.9527	31.6999	42.8122
NCLIV_013950	NCLIV_013950	hypothetical+protein	FR823386:1542916-1546151	-0.0215269	-1.01503	0.869625	0.982508	173.588	138.181	235.906	141.624	76.1539	102.85
NCLIV_013960	NCLIV_013960	conserved+hypothetical+protein	FR823386:1549081-1554787	0.0530893	1.03748	0.782151	0.925376	74.9015	59.6235	101.791	64.3573	34.606	46.7371
NCLIV_013970	NCLIV_013970	conserved+hypothetical+protein	FR823386:1557327-1558271	0.595388	1.51088	0.00276075	0.0149703	45.2225	35.9983	61.4574	56.646	30.4595	41.1371
NCLIV_013980	NCLIV_013980	conserved+hypothetical+protein	FR823386:1560242-1561618	-3.78809	-13.8143	0.0185083	0.0719865	1.91009	1.52048	2.59581	0	0	0
NCLIV_013990	NCLIV_013990	GA21186,+related	FR823386:1566582-1568702	-0.390482	-1.31083	0.181512	0.374748	26.5549	21.1384	36.088	16.7473	9.0053	12.1621
NCLIV_014000	NCLIV_014000	conserved+hypothetical+protein	FR823386:1570029-1570583	0.00631316	1.00439	0.980747	1	29.7033	23.6446	40.3668	24.7068	13.2853	17.9424
NCLIV_014010	NCLIV_014010	conserved+hypothetical+protein	FR823386:1573779-1579218	-0.144675	-1.10548	0.447345	0.668442	71.3365	56.7857	96.9463	53.4295	28.73	38.8013
NCLIV_014020	NCLIV_014020	Peroxiredoxin-2E-1,+related	FR823386:1581678-1582481	-2.59925	-6.05971	1.74405e-35	2.82688e-33	133.442	106.223	181.348	18.1334	9.75063	13.1687
NCLIV_014030	NCLIV_014030	putative+30S+ribosomal+protein+S1	FR823386:1584504-1592081	-0.708047	-1.63359	3.61882e-05	0.000341543	102.145	81.3103	138.815	51.7341	27.8183	37.57
NCLIV_014040	NCLIV_014040	conserved+hypothetical+protein	FR823386:1596384-1598102	-0.491751	-1.40615	0.00292222	0.0156749	126.764	100.908	172.273	74.6206	40.1248	54.1905
NCLIV_014050	NCLIV_014050	conserved+hypothetical+protein	FR823386:1600341-1601616	0.386146	1.3069	0.0229115	0.0850316	67.4379	53.6823	91.6481	73.0253	39.267	53.032
NCLIV_014060	NCLIV_014060	putative+lysophospholipase	FR823386:1605594-1608443	-0.0113929	-1.00793	0.918258	1	383.925	305.614	521.754	315.442	169.619	229.079
NCLIV_014070	NCLIV_014070	putative+u6+snRNA-associated+Sm-like+protein	FR823386:1613162-1614609	-0.0555739	-1.03927	0.794557	0.93476	54.7509	43.5831	74.4064	43.6221	23.4563	31.6789
NCLIV_014080	NCLIV_014080	conserved+hypothetical+protein	FR823386:1617088-1618194	0.0611814	1.04332	0.665594	0.854477	124.862	99.3936	169.688	107.889	58.0137	78.3504
NCLIV_014090	NCLIV_014090	conserved+hypothetical+protein	FR823386:1619478-1620101	0.735403	1.66486	0.112855	0.279642	6.34959	5.05444	8.62909	8.83683	4.75172	6.41743
NCLIV_014100	NCLIV_014100	conserved+hypothetical+protein	FR823386:1620651-1622334	0.166735	1.12252	0.135836	0.318089	348.171	277.153	473.164	323.675	174.045	235.057
NCLIV_014110	NCLIV_014110	conserved+hypothetical+protein	FR823386:1624979-1629100	0.264401	1.20114	0.16768	0.360195	57.7433	45.9652	78.4732	57.463	30.8988	41.7304
NCLIV_014120	NCLIV_014120	conserved+hypothetical+protein	FR823386:1637789-1640443	-0.0435449	-1.03064	0.800536	0.939672	76.5668	60.9492	104.054	61.5189	33.0798	44.6759
NCLIV_014130	NCLIV_014130	GA20816,+related	FR823386:1643633-1645888	-0.399925	-1.31944	0.0534266	0.16043	59.863	47.6525	81.3538	37.5432	20.1876	27.2644
NCLIV_014140	NCLIV_014140	putative+AGC+kinase	FR823386:1648486-1651535	-0.0615712	-1.0436	0.557974	0.770355	641.078	510.315	871.225	508.717	273.546	369.437
NCLIV_014150	NCLIV_014150	unspecified+product	FR823386:1655628-1656020	0.0517276	1.03651	0.542001	0.757339	4101.59	3264.97	5574.06	3520.7	1893.14	2556.78
NCLIV_014160	NCLIV_014160	Tudor+domain-containing+protein,+related	FR823386:1656781-1660091	-0.398142	-1.31781	0.0332591	0.113129	76.214	60.6683	103.575	47.8646	25.7376	34.7599
NCLIV_014170	NCLIV_014170	conserved+hypothetical+protein	FR823386:1662535-1663689	-0.0698845	-1.04963	0.845464	0.966474	15.1878	12.0899	20.6402	11.9764	6.4399	8.6974
NCLIV_014180	NCLIV_014180	Elongation+factor+1-alpha,+related	FR823386:1666142-1668130	-0.646173	-1.56501	2.85493e-12	1.04859e-10	2900.85	2309.15	3942.26	1534.97	825.381	1114.72
NCLIV_014190	NCLIV_014190	Kynurenine+3-monooxygenase+and+related+flavoprotein+monooxygenases+(ISS),+related	FR823386:1670592-1679648	-0.11986	-1.08663	0.518968	0.738575	67.3862	53.6411	91.5778	51.3461	27.6097	37.2882
NCLIV_014200	NCLIV_014200	conserved+hypothetical+protein	FR823386:1682212-1702691	0.044098	1.03104	0.781228	0.924779	120.49	95.9129	163.745	102.885	55.3232	74.7167
NCLIV_014210	NCLIV_014210	conserved+hypothetical+protein	FR823386:1706842-1710307	0.0897277	1.06417	0.667271	0.855003	50.986	40.5862	69.29	44.9418	24.166	32.6374
NCLIV_014220	NCLIV_014220	putative+oocyst+wall+protein	FR823386:1712250-1714546	1.1641	2.24093	0.0737972	0.204614	2.53695	2.01948	3.44772	4.8614	2.61406	3.53042
NCLIV_014230	NCLIV_014230	hypothetical+protein	FR823386:1718100-1720940	0.0658862	1.04673	0.662176	0.852813	116.096	92.4154	157.774	100.644	54.1178	73.0887
NCLIV_014240	NCLIV_014240	conserved+hypothetical+protein	FR823386:1731001-1742019	-0.180635	-1.13338	0.367126	0.590276	58.7415	46.7597	79.8296	42.9063	23.0715	31.1592
NCLIV_014250	NCLIV_014250	NAD-dependent+epimerase/dehydratase,+related	FR823386:1745878-1746558	-0.881611	-1.84243	0.0218381	0.0819451	17.7828	14.1556	24.1668	7.93692	4.26782	5.7639
NCLIV_014260	NCLIV_014260	hypothetical+protein	FR823386:1749128-1754048	-0.177437	-1.13087	0.417867	0.64213	62.3797	49.6559	84.774	45.6642	24.5544	33.1619
NCLIV_014270	NCLIV_014270	conserved+hypothetical+protein	FR823386:1757452-1761657	-0.416263	-1.33447	0.0503468	0.153281	66.4283	52.8786	90.276	41.1919	22.1496	29.9141
NCLIV_014280	NCLIV_014280	putative+methionine+tRNA+synthetase	FR823386:1763002-1768211	-0.584976	-1.50001	0.0187613	0.0726671	40.9685	32.612	55.6762	22.577	12.14	16.3957
NCLIV_014290	NCLIV_014290	conserved+hypothetical+protein	FR823386:1771799-1781049	0.0976947	1.07006	0.514945	0.734117	132.076	105.136	179.491	117.051	62.9402	85.0039
NCLIV_014300	NCLIV_014300	putative+PAN+domain-containing+protein	FR823386:1783089-1785687	-1.64226	-3.12154	0.334808	0.555356	0.316536	0.25197	0.430172	0	0	0
NCLIV_014310	NCLIV_014310	conserved+hypothetical+protein	FR823386:1790071-1795340	-0.597962	-1.51358	0.0378093	0.125454	34.252	27.2655	46.5485	18.698	10.0542	13.5787
NCLIV_014320	NCLIV_014320	conserved+hypothetical+protein	FR823386:1797300-1800880	0.373243	1.29526	0.0312646	0.108071	68.1305	54.2336	92.5893	73.1169	39.3162	53.0985
NCLIV_014330	NCLIV_014330	Prolyl+oligopeptidase+(Precursor),related	FR823386:1803449-1811449	-0.177031	-1.13055	0.111059	0.276111	373.526	297.336	507.621	273.597	147.118	198.69
NCLIV_014340	NCLIV_014340	conserved+hypothetical+protein	FR823386:1814390-1825084	0	1	1	1	0	0	0	0	0	0
NCLIV_014350	NCLIV_014350	hypothetical+protein	FR823386:1827005-1827553	0.0402599	1.0283	0.701881	0.878943	535.978	426.652	728.394	456.429	245.43	331.465
NCLIV_014360	NCLIV_014360	hypothetical+protein	FR823386:1832501-1841821	-0.257824	-1.19567	0.0576682	0.169148	167.228	133.118	227.263	115.805	62.2701	84.0988
NCLIV_014370	NCLIV_014370	conserved+hypothetical+protein	FR823386:1843407-1844049	0.249514	1.18881	0.311519	0.543191	31.0458	24.7132	42.1912	30.5874	16.4474	22.213
NCLIV_014380	NCLIV_014380	putative+tricarboxylate+carrier	FR823386:1847177-1850510	-1.14314	-2.20862	0.240729	0.457643	2.53718	2.01966	3.44803	0.883753	0.475209	0.641793
NCLIV_014390	NCLIV_014390	hypothetical+protein	FR823386:1851424-1855508	-1.02283	-2.0319	3.47974e-06	4.29333e-05	81.7935	65.1097	111.157	33.2735	17.8917	24.1637
NCLIV_014400	NCLIV_014400	putative+glutamic+acid-rich+protein	FR823386:1862311-1870110	-0.0432717	-1.03045	0.779373	0.923785	114.761	91.3528	155.96	92.2268	49.5919	66.9764
NCLIV_014410	NCLIV_014410	conserved+hypothetical+protein	FR823386:1873172-1874316	1.35116	2.55117	0.155201	0.34968	0.952424	0.758154	1.29434	2.20448	1.18539	1.60092
NCLIV_014420	NCLIV_014420	conserved+hypothetical+protein	FR823386:1877854-1883344	1.79595	3.47244	2.74321e-06	3.45496e-05	6.34634	5.05185	8.62467	18.5558	9.97775	13.4754
NCLIV_014430	NCLIV_014430	conserved+hypothetical+protein	FR823386:1886340-1888869	0.0888577	1.06353	0.409965	0.633839	392.653	312.562	533.615	345.838	185.963	251.152
NCLIV_014440	NCLIV_014440	Gelation+factor,+related	FR823386:1891780-1904422	0.0743798	1.05291	0.646024	0.840942	83.937	66.816	114.07	73.1961	39.3588	53.156
NCLIV_014450	NCLIV_014450	Phosphoglucomutase+2,+related	FR823386:1906490-1913662	0.170831	1.12571	0.174368	0.365603	180.037	143.314	244.67	167.854	90.258	121.898
NCLIV_014460	NCLIV_014460	conserved+hypothetical+protein	FR823386:1918523-1926558	0.0248561	1.01738	0.90639	0.997939	52.0657	41.4456	70.7572	43.868	23.5886	31.8575
NCLIV_014470	NCLIV_014470	conserved+hypothetical+protein	FR823386:1929285-1934652	0.35406	1.27815	0.0509573	0.154824	62.7584	49.9573	85.2886	66.4627	35.7381	48.2661
NCLIV_014480	NCLIV_014480	hypothetical+protein	FR823386:1936467-1946171	0.729137	1.65765	0.197557	0.399074	4.12701	3.2852	5.6086	5.74684	3.09017	4.17343
NCLIV_014490	NCLIV_014490	conserved+hypothetical+protein	FR823386:1947899-1949356	0.104696	1.07527	0.468697	0.68731	132.643	105.587	180.262	118.126	63.5182	85.7844
NCLIV_014500	NCLIV_014500	putative+glutathione+s-transferase	FR823386:1950195-1951551	0.439216	1.35587	0.416411	0.64095	5.07824	4.04241	6.90132	5.74618	3.08982	4.17296
NCLIV_014510	NCLIV_014510	unspecified+product	FR823386:1954241-1967168	0.542769	1.45677	0.000118621	0.000988196	122.823	97.7699	166.916	148.231	79.7065	107.648
NCLIV_014520	NCLIV_014520	SRS+domain-containing+protein	FR823386:1969398-1971366	0.992229	1.98926	0.271204	0.497808	1.27045	1.01131	1.72655	2.21522	1.19116	1.60872
NCLIV_014530	NCLIV_014530	SRS+domain-containing+protein	FR823386:1973046-1975107	-0.196521	-1.14593	0.888093	0.991364	0.632245	0.503283	0.85922	0.441081	0.237177	0.320319
NCLIV_014540	NCLIV_014540	hypothetical+protein	FR823386:1977998-1980730	-0.385153	-1.306	0.0699834	0.196978	60.7274	48.3405	82.5285	38.4778	20.6901	27.9431
NCLIV_014550	NCLIV_014550	conserved+hypothetical+protein	FR823386:1981864-1985406	0.345549	1.27063	0.0254387	0.0920732	87.0073	69.2601	118.243	91.5886	49.2488	66.5129
NCLIV_014560	NCLIV_014560	conserved+hypothetical+protein	FR823386:1987499-2001670	0.0142786	1.00995	0.951416	1	37.41	29.7793	50.8402	31.2904	16.8254	22.7235
NCLIV_014570	NCLIV_014570	conserved+hypothetical+protein	FR823386:2007454-2018725	-0.112844	-1.08136	0.598497	0.809725	52.3066	41.6374	71.0846	40.0493	21.5352	29.0844
NCLIV_014580	NCLIV_014580	Hypothetcial+protein,+related	FR823386:2020476-2030212	-5.63547	-49.7101	5.20628e-06	6.17139e-05	7.2636	5.78201	9.87123	0	0	0
NCLIV_014590	NCLIV_014590	conserved+hypothetical+protein	FR823386:2033079-2034285	3.55376	11.7432	0.0152756	0.0617652	0	0	0	1.32649	0.713274	0.963312
NCLIV_014600	NCLIV_014600	conserved+hypothetical+protein	FR823386:2036669-2047738	-0.0911013	-1.06518	0.647708	0.84247	56.7668	45.1879	77.1461	44.1268	23.7277	32.0455
NCLIV_014610	NCLIV_014610	conserved+hypothetical+protein	FR823386:2050511-2051857	0.00718968	1.005	0.993727	1	1.58748	1.26367	2.15738	1.3223	0.711026	0.960275
NCLIV_014620	NCLIV_014620	putative+peptidyl-prolyl+cis-trans+isomerase+H	FR823386:2053742-2055211	-0.615932	-1.53255	0.0207533	0.0788265	35.956	28.6219	48.8642	19.3872	10.4248	14.0792
NCLIV_014630	NCLIV_014630	Novel+protein+similar+to+quinoid+dihydropteridine+reductase+(QDPR,+zgc:112405),+related	FR823386:2056555-2058013	-2.98272	-7.90474	5.67185e-05	0.00051074	9.485	7.5503	12.8901	0.88551	0.476154	0.64307
NCLIV_014640	NCLIV_014640	putative+TBC+domain-containing+protein	FR823386:2062664-2070647	-0.0629966	-1.04463	0.795322	0.935319	36.2091	28.8233	49.2081	28.6992	15.432	20.8417
NCLIV_014650	NCLIV_014650	putative+XPA-binding+protein	FR823386:2072841-2075117	-0.38432	-1.30524	0.174053	0.365251	27.8619	22.1788	37.8643	17.6487	9.49003	12.8168
NCLIV_014660	NCLIV_014660	hypothetical+protein	FR823386:2077487-2078467	-0.720929	-1.64824	0.000324819	0.00234658	72.3711	57.6092	98.3522	36.3133	19.5263	26.3712
NCLIV_014670	NCLIV_014670	YGR048Wp-like+protein,+related	FR823386:2079241-2082448	-0.311574	-1.24106	0.287183	0.516708	28.0555	22.3329	38.1275	18.6967	10.0535	13.5778
NCLIV_014680	NCLIV_014680	putative+notch+(DSL)+domain-containing+protein	FR823386:2086695-2089285	-1.05852	-2.08279	0.403855	0.629156	1.27268	1.01308	1.72957	0.441982	0.237661	0.320973
NCLIV_014690	NCLIV_014690	putative+dihydrolipoamide+acyltransferase	FR823386:2092725-2094418	-0.203044	-1.15112	0.492176	0.711038	25.1673	20.0338	34.2023	18.0902	9.72739	13.1373
NCLIV_014700	NCLIV_014700	conserved+hypothetical+protein	FR823386:2097112-2098308	-0.152698	-1.11165	0.6802	0.863162	14.2645	11.3549	19.3854	10.614	5.70735	7.70806
NCLIV_014710	NCLIV_014710	putative+DEAD/DEAH+box+helicase+domain-containing+protein	FR823386:2103532-2117695	0.251652	1.19057	0.141782	0.328505	70.5812	56.1844	95.9198	69.6139	37.4326	50.5545
NCLIV_014720	NCLIV_014720	conserved+hypothetical+protein	FR823386:2119773-2126444	-1.60726	-3.04672	4.08852e-10	1.11663e-08	55.7194	44.3541	75.7226	15.062	8.0991	10.9382
NCLIV_014730	NCLIV_014730	conserved+hypothetical+protein	FR823386:2131592-2138235	0.18792	1.13912	0.43013	0.653034	32.6994	26.0295	44.4384	30.8646	16.5964	22.4143
NCLIV_014740	NCLIV_014740	unspecified+product	FR823386:2141652-2142965	-1.25873	-2.39285	0.00370259	0.0191049	15.5355	12.3666	21.1127	5.30473	2.85244	3.85236
NCLIV_014750	NCLIV_014750	hypothetical+protein	FR823386:2145912-2153109	0.232072	1.17452	0.0858635	0.228479	212.937	169.503	289.381	207.139	111.382	150.427
NCLIV_014760	NCLIV_014760	conserved+hypothetical+protein	FR823386:2154964-2156325	-0.38305	-1.3041	0.0264232	0.0947627	95.8339	76.2863	130.238	60.8287	32.7086	44.1746
NCLIV_014770	NCLIV_014770	hypothetical+protein	FR823386:2160573-2161154	-0.590807	-1.50609	0.00649489	0.0306676	56.99	45.3655	77.4494	31.2953	16.828	22.7271
NCLIV_014780	NCLIV_014780	conserved+hypothetical+protein	FR823386:2163945-2173240	0.253476	1.19208	0.113969	0.281282	96.5099	76.8244	131.157	95.2993	51.244	69.2076
NCLIV_014790	NCLIV_014790	conserved+hypothetical+protein	FR823386:2174717-2182492	-0.531957	-1.44589	0.0803322	0.216779	29.5585	23.5293	40.17	16.8899	9.08201	12.2657
NCLIV_014800	NCLIV_014800	conserved+hypothetical+protein	FR823386:2182666-2188069	-0.976753	-1.96803	0.0194284	0.0746411	15.8796	12.6406	21.5804	6.62154	3.56052	4.80865
NCLIV_014810	NCLIV_014810	putative+Patched+family+domain+containing+protein	FR823386:2191588-2201921	1.52834	2.88453	0.000777201	0.00501715	5.10093	4.06047	6.93216	12.4193	6.67806	9.01906
NCLIV_014830	NCLIV_014830	conserved+hypothetical+protein	FR823386:2208186-2211823	1.35703	2.56157	0.153254	0.347419	0.949901	0.756146	1.29091	2.20763	1.18708	1.60321
NCLIV_014840	NCLIV_014840	conserved+hypothetical+protein	FR823386:2214496-2216115	2.19718	4.58583	0.16028	0.34968	0	0	0	0.442555	0.23797	0.32139
NCLIV_014850	NCLIV_014850	conserved+hypothetical+protein	FR823386:2224364-2226952	-0.0741367	-1.05273	0.846899	0.966757	13.516	10.7591	18.3683	10.6253	5.71339	7.71622
NCLIV_014860	NCLIV_014860	conserved+hypothetical+protein	FR823386:2232581-2233840	-0.0300471	-1.02105	0.964466	1	3.81152	3.03407	5.17985	3.08922	1.66113	2.24343
NCLIV_014870	NCLIV_014870	hypothetical+protein	FR823386:2237268-2248459	0.704281	1.62933	0.417348	0.641729	1.5866	1.26297	2.15618	2.21824	1.19279	1.61092
NCLIV_014880	NCLIV_014880	hypothetical+protein	FR823386:2250569-2251067	0	1	1	1	0	0	0	0	0	0
NCLIV_014890	NCLIV_014890	conserved+hypothetical+protein	FR823386:2252806-2253759	-2.3889	-5.23757	0.173167	0.36411	0.632245	0.503283	0.85922	0	0	0
NCLIV_014900	NCLIV_014900	conserved+hypothetical+protein	FR823386:2254319-2255257	0.890341	1.85361	4.78816e-05	0.000439661	37.352	29.7331	50.7613	57.4397	30.8863	41.7135
NCLIV_014910	NCLIV_014910	conserved+hypothetical+protein	FR823386:2257750-2259158	0.29739	1.22892	0.289748	0.520318	25.109	19.9874	34.1231	25.5826	13.7562	18.5784
NCLIV_014920	NCLIV_014920	hypothetical+protein	FR823386:2262849-2267125	-0.24658	-1.18639	0.253703	0.475398	61.1685	48.6917	83.1279	42.6782	22.9488	30.9935
NCLIV_014930	NCLIV_014930	conserved+hypothetical+protein	FR823386:2269802-2272356	0.380787	1.30205	0.374561	0.59763	8.552	6.80761	11.6222	9.25889	4.97866	6.72393
NCLIV_014940	NCLIV_014940	conserved+hypothetical+protein	FR823386:2276610-2280942	0.111816	1.08059	0.267237	0.493288	821.942	654.287	1117.02	735.549	395.517	534.166
NCLIV_014950	NCLIV_014950	putative+trans-2,3-enoyl-CoA+reductase	FR823386:2284086-2287972	-0.499613	-1.41383	0.000401645	0.00281983	171.752	136.719	233.41	100.566	54.0761	73.0324
NCLIV_014960	NCLIV_014960	hypothetical+protein	FR823386:2290430-2298357	-0.176171	-1.12988	0.255696	0.478291	114.945	91.4991	156.21	84.2353	45.2947	61.1728
NCLIV_014970	NCLIV_014970	Hypothtetical+protein,+related	FR823386:2300543-2307979	0.0304014	1.0213	0.903137	0.99686	37.6594	29.9779	51.1791	31.8524	17.1276	23.1317
NCLIV_014980	NCLIV_014980	conserved+hypothetical+protein	FR823386:2310684-2319652	-0.0365435	-1.02565	0.803509	0.940756	135.557	107.907	184.222	109.449	58.8525	79.4832
NCLIV_014990	NCLIV_014990	hypothetical+protein	FR823386:2321413-2325078	0.238466	1.17974	0.266407	0.492398	49.4152	39.3358	67.1552	48.3013	25.9724	35.0771
NCLIV_015000	NCLIV_015000	Os05g0488800+protein,+related	FR823386:2328998-2331734	-0.163009	-1.11962	0.343746	0.564531	86.4743	68.8358	117.519	63.9497	34.3868	46.4411
NCLIV_015010	NCLIV_015010	conserved+hypothetical+protein	FR823386:2333671-2338176	-0.13197	-1.09579	0.319222	0.551463	182.352	145.157	247.816	137.802	74.0985	100.074
NCLIV_015020	NCLIV_015020	Ribosomal+RNA+large+subunit+methyltransferase+I,+related	FR823386:2340439-2345216	-0.328114	-1.25537	0.1921	0.391124	37.5012	29.8519	50.9641	24.7133	13.2887	17.9471
NCLIV_015030	NCLIV_015030	putative+cyclin-dependent+kinase-like+5	FR823386:2353598-2360060	0	1	1	1	0	0	0	0	0	0
NCLIV_015040	NCLIV_015040	conserved+hypothetical+protein	FR823386:2370956-2374021	-0.0990669	-1.07108	0.60348	0.811667	67.1094	53.4208	91.2016	51.88	27.8968	37.676
NCLIV_015050	NCLIV_015050	Proteophosphoglycan+ppg4,+related	FR823386:2375141-2400763	0.0268226	1.01877	0.830478	0.959332	331.838	264.151	450.967	279.968	150.544	203.317
NCLIV_015060	NCLIV_015060	hypothetical+protein	FR823386:2405194-2412120	0.315213	1.24419	0.0190338	0.0734936	131.093	104.353	178.155	135.104	72.648	98.1147
NCLIV_015070	NCLIV_015070	hypothetical+protein	FR823386:2416164-2418264	0	1	1	1	0	0	0	0	0	0
NCLIV_015075	NCLIV_015075	unspecified+product	FR823386:2423276-2424319	-0.198739	-1.14769	0.441762	0.663801	34.8692	27.7568	47.3873	25.1456	13.5212	18.2611
NCLIV_015080	NCLIV_015080	conserved+hypothetical+protein	FR823386:2426582-2436662	-1.46523	-2.76107	0.000390425	0.00275143	24.3448	19.3791	33.0845	7.22078	3.88274	5.24383
NCLIV_015090	NCLIV_015090	conserved+hypothetical+protein	FR823386:2438789-2439019	-0.205844	-1.15336	0.221179	0.431411	85.6674	68.1935	116.422	61.4949	33.0668	44.6584
NCLIV_015100	NCLIV_015100	conserved+hypothetical+protein	FR823386:2442996-2454715	-1.11802	-2.17049	1.1317e-05	0.000124015	48.9518	38.9669	66.5255	18.6103	10.0071	13.515
NCLIV_015110	NCLIV_015110	conserved+hypothetical+protein	FR823386:2464449-2465420	-0.219612	-1.16442	0.842735	0.964859	1.27251	1.01295	1.72934	0.887406	0.477173	0.644446
NCLIV_015120	NCLIV_015120	hypothetical+protein	FR823386:2469112-2483485	5.97537	62.9169	9.08322e-156	1.35449e-152	5.69543	4.53371	7.74008	304.389	163.675	221.051
NCLIV_015130	NCLIV_015130	conserved+hypothetical+protein	FR823386:2485596-2489627	-0.392167	-1.31236	0.0665554	0.189911	58.1186	46.2639	78.9831	36.6454	19.7049	26.6124
NCLIV_015140	NCLIV_015140	putative+ribose-phosphate+pyrophosphokinase	FR823386:2491193-2495914	0.253566	1.19215	0.272425	0.499189	37.286	29.6806	50.6717	36.8352	19.8069	26.7502
NCLIV_015150	NCLIV_015150	conserved+hypothetical+protein	FR823386:2498957-2501766	-1.39674	-2.63305	7.02748e-09	1.56877e-07	67.3716	53.6296	91.558	21.1132	11.353	15.3327
NCLIV_015160	NCLIV_015160	hypothetical+protein	FR823386:2502958-2505424	0.0266014	1.01861	0.774298	0.9212	1852.46	1474.6	2517.49	1562.65	840.262	1134.82
NCLIV_015170	NCLIV_015170	putative+EF+hand+domain-containing+protein	FR823386:2508492-2519635	-0.19633	-1.14578	0.888178	0.991364	0.63341	0.504211	0.860804	0.441952	0.237645	0.320951
NCLIV_015180	NCLIV_015180	ATP+synthase,+related	FR823386:2520634-2522501	-0.200947	-1.14945	0.159692	0.34968	137.459	109.421	186.806	99.0175	53.2434	71.9079
NCLIV_015190	NCLIV_015190	conserved+hypothetical+protein	FR823386:2524735-2531661	-0.0646298	-1.04582	0.81962	0.952179	28.3542	22.5707	38.5333	22.4479	12.0706	16.302
NCLIV_015200	NCLIV_015200	Pyruvate+kinase,+related	FR823386:2543756-2546746	-0.0220163	-1.01538	0.822977	0.954641	694.208	552.608	943.428	566.194	304.452	411.178
NCLIV_015210	NCLIV_015210	putative+ATP-dependent+helicase,+putaive	FR823386:2549267-2552224	0.167382	1.12302	0.187841	0.38487	198.925	158.349	270.339	185.018	99.4875	134.363
NCLIV_015220	NCLIV_015220	hypothetical+protein	FR823386:2555020-2559835	-0.249436	-1.18874	0.262621	0.487453	49.4606	39.3719	67.217	34.4369	18.5173	25.0085
NCLIV_015225	NCLIV_015225	Chaperone+protein+dnaJ,+related	FR823386:2568675-2575596	1.07037	2.09998	0.130053	0.307931	2.21765	1.76531	3.01379	3.9919	2.14651	2.89897
NCLIV_015230	NCLIV_015230	Chaperone+protein+dnaJ,+related	FR823386:2578792-2582963	-0.713944	-1.64028	0.0449623	0.14302	19.3044	15.3668	26.2346	9.69828	5.21493	7.04302
NCLIV_015240	NCLIV_015240	conserved+hypothetical+protein	FR823386:2586542-2592097	0.42348	1.34116	0.0503296	0.153281	38.8882	30.956	52.849	43.2338	23.2475	31.397
NCLIV_015250	NCLIV_015250	hypothetical+protein	FR823386:2595005-2605610	-1.05681	-2.08033	0.000149279	0.00119938	36.8032	29.2963	50.0156	14.5865	7.84342	10.5929
NCLIV_015260	NCLIV_015260	conserved+hypothetical+protein	FR823386:2609212-2614388	-0.494836	-1.40916	0.0216386	0.0815245	54.7636	43.5932	74.4237	32.1481	17.2866	23.3464
NCLIV_015270	NCLIV_015270	conserved+hypothetical+protein	FR823386:2624796-2629406	-0.455803	-1.37155	0.109595	0.274208	27.8893	22.2006	37.9016	16.806	9.03689	12.2048
NCLIV_015280	NCLIV_015280	putative+mRNA+processing+protein	FR823386:2630763-2634241	-0.24991	-1.18913	0.24941	0.469597	55.0313	43.8064	74.7876	38.305	20.5973	27.8176
NCLIV_015290	NCLIV_015290	hypothetical+protein	FR823386:2637303-2643774	-0.0421211	-1.02963	0.80379	0.940756	82.9945	66.0658	112.79	66.7499	35.8926	48.4747
NCLIV_0153	NCLIV_0153	longevity-assurance+(LAG1)+domain-containing+protein	FR823386:2652362-2682246	-1.52869	-2.88524	9.89747e-07	1.37678e-05	35.6645	28.3898	48.468	10.1559	5.46098	7.37533
NCLIV_015300	NCLIV_015300	putative+phosphotyrosyl+phosphatase+activator	FR823386:2645169-2649098	-0.157495	-1.11535	0.536289	0.753121	32.6501	25.9903	44.3715	24.2301	13.0289	17.5962
NCLIV_015330	NCLIV_015330	hypothetical+protein	FR823386:2684827-2690287	-1.79668	-3.47419	0.11798	0.28813	2.21917	1.76652	3.01586	0.441195	0.237238	0.320402
NCLIV_015340	NCLIV_015340	hypothetical+protein	FR823386:2691111-2692309	0	1	1	1	0	0	0	0	0	0
NCLIV_015350	NCLIV_015350	conserved+hypothetical+protein	FR823386:2694238-2697789	0.756156	1.68898	0.0051234	0.025	21.5841	17.1815	29.3328	30.2762	16.28	21.987
NCLIV_015360	NCLIV_015360	putative+DnaJ+domain-containing+protein	FR823386:2699937-2703974	0.347659	1.27249	0.0132838	0.0552392	118.933	94.6739	161.63	125.366	67.4112	91.0422
NCLIV_015370	NCLIV_015370	conserved+hypothetical+protein	FR823386:2704519-2714614	0.058989	1.04174	0.751108	0.906044	65.1328	51.8474	88.5155	56.1964	30.2178	40.8106
NCLIV_015380	NCLIV_015380	conserved+hypothetical+protein	FR823386:2717654-2718670	-0.0125162	-1.00871	0.890597	0.992	2752.57	2191.12	3740.74	2259.83	1215.15	1641.12
NCLIV_015390	NCLIV_015390	Zgc:56049,+related	FR823386:2721876-2722900	0	1	1	1	0	0	0	0	0	0
NCLIV_015400	NCLIV_015400	conserved+hypothetical+protein	FR823386:2725424-2732575	-0.180672	-1.13341	0.367181	0.590276	63.1155	50.2415	85.7739	46.1009	24.7893	33.4791
NCLIV_015405	NCLIV_015405	putative+cyclophilin	FR823387:7230-11127	-1.15801	-2.2315	1.93534e-07	3.13693e-06	71.9552	57.2782	97.7871	26.6346	14.3219	19.3424
NCLIV_015410	NCLIV_015410	hypothetical+protein	FR823387:12403-14487	-0.0194672	-1.01359	0.823905	0.955371	1675.89	1334.05	2277.54	1369.27	736.281	994.385
NCLIV_015420	NCLIV_015420	conserved+hypothetical+protein	FR823387:17199-19809	-0.0611917	-1.04333	0.737694	0.896682	68.5999	54.6073	93.2272	54.4456	29.2763	39.5391
NCLIV_015430	NCLIV_015430	hypothetical+protein	FR823387:23802-34655	-1.55623	-2.94085	3.51582e-18	2.49657e-16	132.823	105.731	180.507	37.3207	20.068	27.1028
NCLIV_015440	NCLIV_015440	hypothetical+protein	FR823387:37681-45272	-0.590166	-1.50542	1.46396e-06	1.98762e-05	322.914	257.048	438.84	177.595	95.4961	128.972
NCLIV_015450	NCLIV_015450	putative+EF-hand+domain-containing+protein	FR823387:48655-49560	0	1	1	1	0	0	0	0	0	0
NCLIV_015460	NCLIV_015460	hypothetical+protein	FR823387:51744-54342	0.211995	1.15829	0.282806	0.512293	66.0094	52.5452	89.7067	63.3352	34.0564	45.9948
NCLIV_015470	NCLIV_015470	conserved+hypothetical+protein	FR823387:58529-65116	-0.638269	-1.55646	0.0196829	0.0753754	34.8906	27.7738	47.4162	18.5196	9.95833	13.4492
NCLIV_015480	NCLIV_015480	emp24/gp25L/p24+family+domain-containing,transmembrane+protein	FR823387:70486-72424	0.00569095	1.00395	0.968238	1	140.07	111.499	190.355	116.456	62.6202	84.5717
NCLIV_015490	NCLIV_015490	replication+factor+A+protein+3+domain-containing+protein	FR823387:75978-77703	-0.561511	-1.47581	0.0136108	0.0565359	56.2845	44.8039	76.4906	31.5431	16.9613	22.907
NCLIV_0155	NCLIV_0155	alpha/beta+hydrolase+fold+domain+containing+protein	FR823387:135717-141770	-1.58364	-2.99726	3.91264e-11	1.26289e-09	81.0542	64.5212	110.153	22.3135	11.9984	16.2044
NCLIV_015500	NCLIV_015500	conserved+hypothetical+protein	FR823387:80438-82177	-0.461512	-1.37698	0.090773	0.239153	31.6749	25.214	43.0462	19.0158	10.2251	13.8096
NCLIV_015510	NCLIV_015510	conserved+hypothetical+protein	FR823387:84684-91125	-0.277531	-1.21212	0.198344	0.399649	53.853	42.8684	73.1862	36.7714	19.7726	26.7039
NCLIV_015520	NCLIV_015520	conserved+hypothetical+protein	FR823387:94090-95139	-0.453652	-1.3695	0.000890588	0.00565125	248.446	197.77	337.639	150.201	80.7658	109.078
NCLIV_015530	NCLIV_015530	conserved+hypothetical+protein	FR823387:97377-98477	0.368475	1.29099	0.000282571	0.00206756	447.451	356.182	608.085	478.415	257.252	347.431
NCLIV_015540	NCLIV_015540	conserved+hypothetical+protein	FR823387:101620-107433	0.821605	1.76737	5.19608e-09	1.17045e-07	106.781	85.0006	145.116	156.383	84.0899	113.568
NCLIV_015550	NCLIV_015550	putative+26S+proteasome+non-ATPase+regulatory+subunit	FR823387:120561-126164	-0.721138	-1.64848	6.40142e-07	9.40819e-06	170.065	135.376	231.118	85.3853	45.9131	62.008
NCLIV_015560	NCLIV_015560	hypothetical+protein	FR823387:128010-132520	-0.0799222	-1.05696	0.718027	0.880538	51.9698	41.3693	70.6269	40.712	21.8915	29.5656
NCLIV_015580	NCLIV_015580	unspecified+product	FR823387:143899-144861	-1.64493	-3.12732	0.334449	0.555356	0.317124	0.252439	0.430971	0	0	0
NCLIV_015590	NCLIV_015590	unspecified+product	FR823387:147019-147972	0	1	1	1	0	0	0	0	0	0
NCLIV_015600	NCLIV_015600	hypothetical+protein	FR823387:150995-156513	-0.926984	-1.9013	0.0021391	0.0120008	30.5322	24.3044	41.4933	13.2406	7.11967	9.61547
NCLIV_015610	NCLIV_015610	putative+bystin	FR823387:157664-163898	-0.0839609	-1.05992	0.523135	0.741963	253.478	201.775	344.476	198.04	106.49	143.82
NCLIV_015620	NCLIV_015620	60S+ribosomal+protein+L36,+related	FR823387:164262-165474	0.0247599	1.01731	0.803088	0.940756	1118.84	890.627	1520.51	942.6	506.852	684.529
NCLIV_015630	NCLIV_015630	conserved+hypothetical+protein	FR823387:167109-168266	1.05607	2.07926	4.41752e-05	0.000407636	21.1497	16.8357	28.7424	36.5508	19.654	26.5437
NCLIV_015640	NCLIV_015640	conserved+hypothetical+protein	FR823387:171238-171600	-1.64226	-3.12154	0.334808	0.555356	0.316536	0.25197	0.430172	0	0	0
NCLIV_015650	NCLIV_015650	hypothetical+protein	FR823387:173105-177665	-1.76084	-3.38896	6.06873e-06	7.07007e-05	23.8139	18.9565	32.3631	5.73249	3.08246	4.16301
NCLIV_015660	NCLIV_015660	conserved+hypothetical+protein	FR823387:179714-185039	-0.0908882	-1.06503	0.446874	0.668116	281.573	224.139	382.657	218.938	117.727	158.996
NCLIV_015670	NCLIV_015670	conserved+hypothetical+protein	FR823387:189611-197546	0.447224	1.36341	0.000507763	0.00346375	149.981	119.389	203.824	169.389	91.0833	123.013
NCLIV_015680	NCLIV_015680	Endonuclease/exonuclease/phosphatase+family+protein,+related	FR823387:202356-214815	-0.0998379	-1.07165	0.476104	0.69531	158.606	126.254	215.545	122.558	65.9014	89.0032
NCLIV_015690	NCLIV_015690	conserved+hypothetical+protein	FR823387:217464-222392	-0.0122942	-1.00856	0.945797	1	86.3075	68.703	117.292	70.8668	38.1063	51.4644
NCLIV_015700	NCLIV_015700	conserved+hypothetical+protein	FR823387:231409-237724	0.32768	1.25499	0.243249	0.460672	22.5747	17.97	30.679	23.4937	12.633	17.0614
NCLIV_015710	NCLIV_015710	conserved+hypothetical+protein	FR823387:241209-244700	0.0946886	1.06783	0.633698	0.83253	66.3684	52.8309	90.1946	58.698	31.5629	42.6273
NCLIV_015720	NCLIV_015720	hypothetical+protein	FR823387:247563-248138	0.464117	1.37947	0.152897	0.347032	15.8052	12.5814	21.4793	18.1024	9.73399	13.1462
NCLIV_015730	NCLIV_015730	conserved+hypothetical+protein	FR823387:252476-254234	0.248993	1.18838	0.334764	0.555356	28.3184	22.5421	38.4846	27.8915	14.9977	20.2552
NCLIV_015740	NCLIV_015740	conserved+hypothetical+protein	FR823387:258013-272773	-0.403024	-1.32228	0.00961988	0.0426686	114.565	91.1965	155.694	71.7217	38.566	52.0853
NCLIV_015750	NCLIV_015750	conserved+hypothetical+protein	FR823387:274409-280083	-0.234472	-1.17648	0.089814	0.23671	153.897	122.506	209.146	108.313	58.2415	78.658
NCLIV_015760	NCLIV_015760	conserved+hypothetical+protein	FR823387:283089-287714	1.37717	2.59759	0.0246764	0.0898813	2.83325	2.25534	3.85039	6.28818	3.38126	4.56656
NCLIV_015770	NCLIV_015770	conserved+hypothetical+protein	FR823387:291978-294599	-1.38176	-2.60586	1.27815e-05	0.000136336	32.327	25.7331	43.9324	10.197	5.48309	7.40518
NCLIV_015780	NCLIV_015780	hypothetical+protein	FR823387:296737-302677	-0.174106	-1.12827	0.399784	0.625035	53.002	42.1909	72.0297	38.8892	20.9114	28.2419
NCLIV_015790	NCLIV_015790	putative+fatty+acyl-CoA+desaturase	FR823387:305959-319913	0.250377	1.18952	0.0116596	0.0498762	630.4	501.815	856.714	621.024	333.935	450.996
NCLIV_015800	NCLIV_015800	putative+glutamic+acid-rich+protein	FR823387:324783-338411	0.0532831	1.03762	0.568144	0.780125	1000.52	796.439	1359.7	859.75	462.302	624.362
NCLIV_015810	NCLIV_015810	putative+retinitis+pigmentosa+GTPase+regulator	FR823387:340868-345439	-1.20451	-2.30459	0.0102384	0.0448518	13.718	10.9199	18.6428	4.85986	2.61323	3.52929
NCLIV_015820	NCLIV_015820	Large+protein+with+8+or+more+transmembrane+domains+within+NH2+region,+related	FR823387:349009-360851	-0.52134	-1.43529	0.0292214	0.102481	49.1528	39.1269	66.7986	28.3229	15.2297	20.5685
NCLIV_015830	NCLIV_015830	hypothetical+protein	FR823387:367197-386948	-0.0858898	-1.06134	0.740876	0.89882	31.1722	24.8139	42.363	24.3151	13.0747	17.658
NCLIV_015840	NCLIV_015840	hypothetical+protein	FR823387:395569-396420	-0.70709	-1.63251	0.193153	0.392838	7.90248	6.29058	10.7395	3.96118	2.13	2.87667
NCLIV_015850	NCLIV_015850	AT4g32400/F8B4_100,+related	FR823387:399862-402631	-0.684809	-1.60749	0.0529522	0.159327	20.9528	16.679	28.4748	10.7463	5.77845	7.80409
NCLIV_015860	NCLIV_015860	hypothetical+protein	FR823387:405402-406292	-0.0930972	-1.06666	0.613745	0.817012	68.8972	54.8439	93.6312	53.483	28.7587	38.8401
NCLIV_015870	NCLIV_015870	SRS+domain-containing+protein	FR823387:407530-408432	0.22066	1.16527	0.667398	0.855003	7.36505	5.86277	10.0091	7.12343	3.83039	5.17313
NCLIV_015880	NCLIV_015880	hypothetical+protein	FR823387:413027-414259	0.0824665	1.05883	0.355012	0.576556	2002.82	1594.29	2721.83	1756.19	944.335	1275.37
NCLIV_015890	NCLIV_015890	putative+leucine+rich+repeat+protein	FR823387:416449-423554	-3.24759	-9.49776	0.0542739	0.161956	1.26717	1.0087	1.72208	0	0	0
NCLIV_015900	NCLIV_015900	Protein+kinase+domain-containing+protein,+related	FR823387:425563-431073	0.145611	1.1062	0.343491	0.564421	97.0457	77.2509	131.885	88.9159	47.8116	64.5719
NCLIV_015910	NCLIV_015910	hypothetical+protein	FR823387:433021-441600	0.031521	1.02209	0.834601	0.961196	114.298	90.9841	155.331	96.7489	52.0235	70.2604
NCLIV_015920	NCLIV_015920	Histone+H4,+related	FR823387:446457-446768	0.540005	1.45398	7.80583e-07	1.12634e-05	345.894	275.34	470.07	416.547	223.985	302.502
NCLIV_015930	NCLIV_015930	putative+cell+surface+glycoprotein,+related	FR823387:452573-454984	0.060804	1.04305	0.700021	0.877497	106.619	84.8719	144.896	92.1015	49.5245	66.8854
NCLIV_015940	NCLIV_015940	conserved+hypothetical+protein	FR823387:456308-463065	-0.61784	-1.53458	0.000108278	0.000910172	123.931	98.6524	168.422	66.8366	35.9392	48.5376
NCLIV_015950	NCLIV_015950	conserved+hypothetical+protein	FR823387:468364-475530	-0.211203	-1.15765	0.267396	0.493368	68.5172	54.5415	93.1149	48.9976	26.3468	35.5827
NCLIV_015960	NCLIV_015960	GF13052,+related	FR823387:480176-486764	-0.174085	-1.12825	0.400888	0.626236	57.9389	46.1209	78.7389	42.5138	22.8604	30.8741
NCLIV_015970	NCLIV_015970	Ribose+5-phosphate+isomerase+A,related	FR823387:490097-493362	0.0016848	1.00117	0.993093	1	60.0205	47.7779	81.5678	49.7637	26.7588	36.1391
NCLIV_015980	NCLIV_015980	hypothetical+protein	FR823387:494917-496675	0.15564	1.11392	0.441533	0.663724	53.4194	42.5232	72.5969	49.2922	26.5052	35.7966
NCLIV_015990	NCLIV_015990	hypothetical+protein	FR823387:499722-502058	-0.170402	-1.12537	0.0686257	0.194331	1030.85	820.585	1400.93	758.572	407.897	550.886
NCLIV_0160	NCLIV_0160	PIK3R4+kinase-related+protein+(incomplete+catalytic+triad)	FR823387:536757-558445	-0.511278	-1.42531	0.000314801	0.00228323	163.017	129.765	221.539	94.6804	50.9112	68.7582
NCLIV_016000	NCLIV_016000	conserved+hypothetical+protein	FR823387:505969-512793	-1.0441	-2.06208	0.000125329	0.00103598	40.9361	32.5862	55.6322	16.376	8.80566	11.8925
NCLIV_016010	NCLIV_016010	conserved+hypothetical+protein	FR823387:515090-526904	0.171819	1.12648	0.376792	0.599138	56.2186	44.7515	76.4011	52.4615	28.2094	38.0982
NCLIV_016020	NCLIV_016020	conserved+hypothetical+protein	FR823387:530043-534418	-0.128853	-1.09342	0.846305	0.966474	4.08621	3.25273	5.55316	3.08372	1.65817	2.23944
NCLIV_016040	NCLIV_016040	conserved+hypothetical+protein	FR823387:562041-568282	-0.225124	-1.16888	0.211941	0.418827	98.259	78.2167	133.534	69.5987	37.4244	50.5435
NCLIV_016050	NCLIV_016050	hypothetical+protein	FR823387:570817-581646	0.247456	1.18711	0.0920501	0.241919	138.546	110.286	188.284	136.229	73.2526	98.9313
NCLIV_016060	NCLIV_016060	putative+protein+kinase	FR823387:588676-596032	0.430169	1.34739	9.47761e-06	0.00010547	796.784	634.261	1082.83	889.119	478.095	645.691
NCLIV_016070	NCLIV_016070	conserved+hypothetical+protein	FR823387:600820-603743	2.19238	4.57058	0.160723	0.34968	0	0	0	0.441081	0.237177	0.320319
NCLIV_016080	NCLIV_016080	putative+protein+kinase+(incomplete+catalytic+triad)	FR823387:605032-613432	0.138244	1.10056	0.275435	0.503591	230.476	183.465	313.216	210.073	112.96	152.558
NCLIV_016090	NCLIV_016090	conserved+hypothetical+protein	FR823387:616342-629701	1.46746	2.76534	0.000507097	0.00346238	6.30283	5.01722	8.56554	14.6498	7.87746	10.6389
NCLIV_0161	NCLIV_0161	serine:pyruvate/alanine:glyoxylate+aminotransferase	FR823387:668250-672150	1.27594	2.42157	0.0794274	0.215315	1.90131	1.51349	2.58388	3.98801	2.14442	2.89615
NCLIV_016100	NCLIV_016100	putative+RNB-like+protein+domain+containing+protein	FR823387:632517-647954	-0.667056	-1.58783	0.00211694	0.0119304	60.091	47.834	81.6636	31.2952	16.828	22.727
NCLIV_016110	NCLIV_016110	hypothetical+protein	FR823387:650957-655452	0.148249	1.10822	0.191304	0.390356	325.05	258.748	441.742	298.333	160.419	216.653
NCLIV_016120	NCLIV_016120	putative+proteasome+subunit+alpha+type+4,+subunit	FR823387:658723-661020	-0.36794	-1.29051	0.00703731	0.0327734	205.263	163.394	278.952	131.691	70.8126	95.6359
NCLIV_016130	NCLIV_016130	conserved+hypothetical+protein	FR823387:662893-665554	-2.39155	-5.24719	0.172851	0.36411	0.63341	0.504211	0.860804	0	0	0
NCLIV_016150	NCLIV_016150	Serine--pyruvate+transaminase,related	FR823387:674487-675632	-0.540393	-1.45437	3.63835e-05	0.000342832	240.041	191.079	326.216	136.644	73.4757	99.2326
NCLIV_016160	NCLIV_016160	hypothetical+protein	FR823387:682551-686132	0.0322484	1.0226	0.875205	0.985283	55.5368	44.2088	75.4745	47.0344	25.2912	34.157
NCLIV_016170	NCLIV_016170	putative+roadblock/LC7+domain-containing+protein	FR823387:691475-693317	0.144105	1.10505	0.901007	0.995995	0.95155	0.757458	1.29316	0.883809	0.475239	0.641834
NCLIV_016180	NCLIV_016180	hypothetical+protein	FR823387:694441-704610	0.256345	1.19445	0.085948	0.228545	99.6395	79.3156	135.41	98.5848	53.0107	71.5936
NCLIV_016190	NCLIV_016190	conserved+hypothetical+protein	FR823387:707796-709007	-1.64645	-3.13063	0.334245	0.555356	0.31746	0.252706	0.431428	0	0	0
NCLIV_016200	NCLIV_016200	conserved+hypothetical+protein	FR823387:710713-717396	3.27982	9.71237	3.88014e-05	0.00036299	0.634023	0.504699	0.861638	6.17579	3.32083	4.48494
NCLIV_016210	NCLIV_016210	putative+WD+domain,+G-beta+repeat-containing+protein	FR823387:719724-725159	-0.00354367	-1.00246	0.984219	1	75.0718	59.7591	102.023	62.0183	33.3483	45.0386
NCLIV_016220	NCLIV_016220	unspecified+product	FR823387:729111-730835	0.102666	1.07376	0.351853	0.57355	417.29	332.173	567.096	371.072	199.532	269.477
NCLIV_016230	NCLIV_016230	conserved+hypothetical+protein	FR823387:733832-735646	-0.271621	-1.20716	0.410761	0.63448	20.575	16.3782	27.9614	14.0939	7.57853	10.2352
NCLIV_016240	NCLIV_016240	5'-Nucleotidase+domain+protein+(Precursor),related	FR823387:738217-743817	0.693636	1.61735	6.79576e-06	7.79526e-05	78.2562	62.294	106.35	104.893	56.4028	76.1747
NCLIV_016250	NCLIV_016250	putative+cytidine+deaminase	FR823387:746972-750154	-1.31632	-2.49029	3.10265e-07	4.78952e-06	53.3789	42.491	72.542	17.6768	9.5051	12.8371
NCLIV_016260	NCLIV_016260	conserved+hypothetical+protein	FR823387:750527-751034	-0.802352	-1.74394	0.251448	0.472229	4.74834	3.7798	6.45299	2.20241	1.18427	1.59942
NCLIV_016270	NCLIV_016270	conserved+hypothetical+protein	FR823387:751825-753101	0	1	1	1	0	0	0	0	0	0
NCLIV_016280	NCLIV_016280	conserved+hypothetical+protein	FR823387:753458-754462	2.19238	4.57058	0.160723	0.34968	0	0	0	0.441081	0.237177	0.320319
NCLIV_016290	NCLIV_016290	conserved+hypothetical+protein	FR823387:755566-758853	0	1	1	1	0	0	0	0	0	0
NCLIV_016300	NCLIV_016300	conserved+hypothetical+protein	FR823387:759574-762918	0.0852154	1.06085	0.667831	0.855286	54.9182	43.7163	74.6338	48.2542	25.9471	35.0429
NCLIV_016310	NCLIV_016310	conserved+hypothetical+protein	FR823387:764168-765911	-0.776214	-1.71263	0.0566166	0.166917	15.6384	12.4486	21.2526	7.51095	4.03877	5.45455
NCLIV_016320	NCLIV_016320	conserved+hypothetical+protein	FR823387:769609-788012	0.229945	1.17279	0.175062	0.366424	74.9264	59.6433	101.825	72.7934	39.1423	52.8636
NCLIV_016330	NCLIV_016330	putative+phosphomannomutase+2	FR823387:790853-794568	-0.682908	-1.60537	0.0107038	0.0464807	36.173	28.7947	49.1592	18.6132	10.0086	13.5172
NCLIV_016340	NCLIV_016340	putative+ribosomal+protein+L24	FR823387:796736-800109	-0.0441623	-1.03108	0.840369	0.96459	43.9855	35.0136	59.7762	35.3242	18.9944	25.6529
NCLIV_016350	NCLIV_016350	GH22033,+related	FR823387:805122-807702	0.724447	1.65227	0.220441	0.430377	3.81261	3.03493	5.18133	5.29789	2.84877	3.8474
NCLIV_016360	NCLIV_016360	unspecified+product	FR823387:810658-811872	0.668985	1.58995	1.87058e-09	4.55787e-08	313.48	249.538	426.019	412.834	221.988	299.805
NCLIV_016370	NCLIV_016370	Galactosyltransferase,+related	FR823387:816222-824556	-0.365944	-1.28872	0.00527578	0.0255928	263.603	209.835	358.236	169.364	91.0698	122.994
NCLIV_016380	NCLIV_016380	Ribosomal+protein+L22,+related	FR823387:830383-832412	0.0309256	1.02167	0.748453	0.903865	1454.2	1157.58	1976.25	1230.38	661.594	893.516
NCLIV_016390	NCLIV_016390	ERYTHROCYTE+MEMBRANE+PROTEIN+PFEMP3,+related	FR823387:833803-834438	-0.26839	-1.20446	0.115445	0.284073	86.1456	68.5741	117.072	59.2093	31.8379	42.9986
NCLIV_016400	NCLIV_016400	hypothetical+protein	FR823387:836465-837028	0.358456	1.28205	0.373748	0.596971	10.3779	8.26107	14.1036	11.0521	5.9429	8.02618
NCLIV_016410	NCLIV_016410	conserved+hypothetical+protein	FR823387:837242-839250	-0.159835	-1.11716	0.55616	0.768891	29.2513	23.2848	39.7525	21.671	11.6529	15.7378
NCLIV_016420	NCLIV_016420	putative+pescadillo+family+protein	FR823387:841228-846897	-0.429327	-1.34661	0.00133368	0.00797428	232.232	184.862	315.603	142.786	76.7786	103.693
NCLIV_016430	NCLIV_016430	conserved+hypothetical+protein	FR823387:854872-857931	0.444139	1.3605	0.00080498	0.00517408	136.317	108.512	185.255	153.631	82.6101	111.569
NCLIV_016440	NCLIV_016440	conserved+hypothetical+protein	FR823387:864211-867153	0.226422	1.16993	0.339485	0.559581	32.8768	26.1708	44.6795	31.8737	17.139	23.1471
NCLIV_016450	NCLIV_016450	hypothetical+protein	FR823387:872147-879669	0.049498	1.0349	0.640232	0.8364	468.368	372.833	636.511	401.417	215.849	291.515
NCLIV_016460	NCLIV_016460	conserved+hypothetical+protein	FR823387:883655-887823	-0.279472	-1.21375	0.262719	0.487514	36.4961	29.0519	49.5982	24.879	13.3779	18.0675
NCLIV_016470	NCLIV_016470	conserved+hypothetical+protein	FR823387:892346-894664	-0.510173	-1.42422	0.0255298	0.0922557	50.3896	40.1114	68.4794	29.2632	15.7353	21.2513
NCLIV_016480	NCLIV_016480	hypothetical+protein	FR823387:898941-904245	0.156167	1.11432	0.364157	0.587061	79.978	63.6646	108.69	73.8196	39.6941	53.6088
NCLIV_016490	NCLIV_016490	conserved+hypothetical+protein	FR823387:907435-915835	0.0458787	1.03231	0.788011	0.929653	77.7294	61.8746	105.634	66.4546	35.7338	48.2603
NCLIV_016500	NCLIV_016500	conserved+hypothetical+protein	FR823387:920397-922773	0.374938	1.29678	0.599366	0.810415	2.85833	2.2753	3.88446	3.10603	1.67016	2.25564
NCLIV_016510	NCLIV_016510	putative+subtilase+family+serine+protease	FR823387:926524-932864	0.545923	1.45995	0.716705	0.880209	0.31746	0.252706	0.431428	0.441081	0.237177	0.320319
NCLIV_016520	NCLIV_016520	hypothetical+protein	FR823387:942242-946220	0.0652899	1.0463	0.651231	0.843577	196.493	156.413	267.034	170.262	91.5528	123.647
NCLIV_016530	NCLIV_016530	conserved+hypothetical+protein	FR823387:953647-954490	0.0262492	1.01836	0.926234	1	26.3208	20.952	35.77	22.1994	11.937	16.1215
NCLIV_016540	NCLIV_016540	conserved+hypothetical+protein	FR823387:957082-962920	-0.241708	-1.18239	0.0777546	0.21197	215.106	171.23	292.329	150.642	81.0026	109.398
NCLIV_016550	NCLIV_016550	conserved+hypothetical+protein	FR823387:980926-984004	0.126057	1.09131	0.503403	0.722029	67.2626	53.5428	91.4099	60.8015	32.694	44.1549
NCLIV_016560	NCLIV_016560	hypothetical+protein	FR823387:985486-989886	-0.363292	-1.28636	0.399294	0.624661	11.7343	9.3408	15.9469	7.52668	4.04722	5.46598
NCLIV_016570	NCLIV_016570	hypothetical+protein	FR823387:994416-998822	0	1	1	1	0	0	0	0	0	0
NCLIV_016580	NCLIV_016580	hypothetical+protein	FR823387:1003996-1008432	0.659712	1.57977	0.535377	0.752313	0.956157	0.761125	1.29942	1.3237	0.711774	0.961286
NCLIV_016590	NCLIV_016590	conserved+hypothetical+protein	FR823387:1018765-1042247	-0.31103	-1.24059	0.00658902	0.0310542	376.762	299.913	512.02	251.478	135.224	182.627
NCLIV_016600	NCLIV_016600	putative+CAM+kinase,+CDPK+family	FR823387:1043594-1053581	1.11229	2.16188	0.137048	0.320223	1.89831	1.51111	2.5798	3.54139	1.90426	2.5718
NCLIV_016610	NCLIV_016610	conserved+hypothetical+protein	FR823387:1058763-1059923	-0.241244	-1.18201	0.370301	0.593246	32.629	25.9735	44.3428	22.8421	12.2826	16.5882
NCLIV_016620	NCLIV_016620	putative+protein+kinase+(incomplete+catalytic+triad)	FR823387:1062343-1070561	0.214297	1.16014	0.191916	0.390964	81.2599	64.685	110.432	78.0913	41.991	56.711
NCLIV_016630	NCLIV_016630	putative+glyoxalase	FR823387:1073712-1078878	-0.880248	-1.84069	0.00124279	0.00749699	37.3782	29.754	50.7969	16.7605	9.01239	12.1717
NCLIV_016640	NCLIV_016640	conserved+hypothetical+protein	FR823387:1081634-1082881	-0.104034	-1.07477	0.459018	0.680811	147.171	117.152	200.005	113.39	60.9718	82.3455
NCLIV_016650	NCLIV_016650	putative+Maf-like+protein	FR823387:1084604-1085407	-0.248332	-1.18783	0.686932	0.868537	5.09257	4.05382	6.9208	3.53142	1.89891	2.56457
NCLIV_016660	NCLIV_016660	unspecified+product	FR823387:1087997-1089169	-0.457991	-1.37363	0.137949	0.322126	24.3141	19.3546	33.0428	14.6244	7.86378	10.6204
NCLIV_016670	NCLIV_016670	conserved+hypothetical+protein	FR823387:1090134-1091871	0.550119	1.46421	0.715194	0.880067	0.316536	0.25197	0.430172	0.441081	0.237177	0.320319
NCLIV_016680	NCLIV_016680	conserved+hypothetical+protein	FR823387:1092953-1094031	0.575936	1.49064	0.322986	0.555265	4.47878	3.56522	6.08665	5.59371	3.00784	4.06223
NCLIV_016690	NCLIV_016690	conserved+hypothetical+protein	FR823387:1094992-1095426	0.0619174	1.04385	0.826176	0.956368	25.1528	20.0223	34.1826	21.7489	11.6948	15.7943
NCLIV_0167	NCLIV_0167	DNA-directed+RNA+polymerases+I,+II,+and+III+subunit+RPABC1	FR823387:1134473-1136725	-0.159449	-1.11686	0.422328	0.646587	63.4502	50.508	86.2287	47.0353	25.2917	34.1577
NCLIV_016700	NCLIV_016700	conserved+hypothetical+protein	FR823387:1096910-1098363	-0.0214742	-1.015	0.900486	0.995995	93.6349	74.5358	127.25	76.394	41.0784	55.4784
NCLIV_016710	NCLIV_016710	conserved+hypothetical+protein	FR823387:1100054-1103767	-0.0602904	-1.04268	0.736686	0.895748	73.1384	58.2201	99.3951	58.0845	31.233	42.1817
NCLIV_016720	NCLIV_016720	conserved+hypothetical+protein	FR823387:1104576-1105926	0.17677	1.13035	0.193278	0.392986	133.955	106.632	182.045	125.41	67.4352	91.0746
NCLIV_016730	NCLIV_016730	hypothetical+protein	FR823387:1112306-1113517	-0.19368	-1.14368	0.889382	0.991364	0.632245	0.503283	0.85922	0.441952	0.237645	0.320951
NCLIV_016740	NCLIV_016740	Conserved+oligomeric+Golgi+complex+component+8,related	FR823387:1114586-1118700	-0.0791069	-1.05636	0.63174	0.831575	95.3571	75.9067	129.59	74.749	40.1938	54.2838
NCLIV_016750	NCLIV_016750	Cytochrome+c+oxidase+copper+chaperone,+related	FR823387:1119503-1119736	-0.1088	-1.07833	0.708953	0.880067	27.2316	21.6771	37.0078	20.9036	11.2402	15.1805
NCLIV_016760	NCLIV_016760	hypothetical+protein	FR823387:1120582-1121998	-0.724472	-1.6523	0.0028239	0.0152813	45.7317	36.4036	62.1493	22.8729	12.2991	16.6106
NCLIV_016770	NCLIV_016770	conserved+hypothetical+protein	FR823387:1123958-1126747	0.167528	1.12313	0.373388	0.596525	60.1761	47.9017	81.7793	55.9864	30.1049	40.6581
NCLIV_016780	NCLIV_016780	conserved+hypothetical+protein	FR823387:1131643-1132841	-2.09328	-4.26716	0.000105801	0.000893374	14.1085	11.2307	19.1735	2.6441	1.42178	1.92018
NCLIV_016800	NCLIV_016800	putative+TCP-1/cpn60+chaperonin+family+protein	FR823387:1138001-1141284	-0.609582	-1.52582	5.40104e-06	6.3767e-05	294.69	234.581	400.483	159.901	85.9813	116.122
NCLIV_016810	NCLIV_016810	conserved+hypothetical+protein	FR823387:1141409-1142738	-0.777889	-1.71462	0.00801274	0.0365401	32.1475	25.5902	43.6884	15.475	8.32116	11.2381
NCLIV_016820	NCLIV_016820	conserved+hypothetical+protein	FR823387:1142964-1143645	0	1	1	1	0	0	0	0	0	0
NCLIV_016830	NCLIV_016830	putative+ULK+kinase	FR823387:1145235-1148208	-0.687067	-1.61001	7.22603e-05	0.000636096	98.7467	78.605	134.197	50.7459	27.2869	36.8524
NCLIV_016840	NCLIV_016840	AFL091Wp,+related	FR823387:1152713-1155806	-0.180286	-1.13311	0.107968	0.271447	367.88	292.842	499.949	268.854	144.567	195.245
NCLIV_016850	NCLIV_016850	AT3G15980+protein,+related	FR823387:1159952-1171542	-0.445928	-1.36219	0.000720297	0.00468863	208.008	165.58	282.683	126.425	67.9808	91.8115
NCLIV_016860	NCLIV_016860	conserved+hypothetical+protein	FR823387:1174539-1177703	0.0310577	1.02176	0.842584	0.964859	107.667	85.7055	146.319	91.1064	48.9895	66.1627
NCLIV_016870	NCLIV_016870	hypothetical+protein	FR823387:1178477-1179504	0.185322	1.13707	0.441075	0.663303	32.3691	25.7666	43.9896	30.4975	16.399	22.1477
NCLIV_016880	NCLIV_016880	S-adenosylmethionine+synthetase,related	FR823387:1185396-1187949	-0.132882	-1.09648	0.204525	0.407628	625.307	497.76	849.791	472.265	253.945	342.965
NCLIV_016890	NCLIV_016890	hypothetical+protein	FR823387:1190396-1196509	0.0776832	1.05532	0.527032	0.744797	228.791	182.123	310.927	199.96	107.522	145.214
NCLIV_0169	NCLIV_0169	hydrolase,+alpha/beta+fold+family+domain-containing+protein	FR823387:1255181-1256464	0.0921792	1.06598	0.70299	0.879451	32.9957	26.2655	44.8412	29.1364	15.6671	21.1592
NCLIV_016900	NCLIV_016900	hypothetical+protein	FR823387:1199312-1213467	-0.00368725	-1.00256	0.982442	1	108.914	86.6983	148.014	89.9662	48.3763	65.3346
NCLIV_016910	NCLIV_016910	conserved+hypothetical+protein	FR823387:1215599-1217364	-0.0603863	-1.04274	0.809476	0.944327	35.4631	28.2296	48.1944	28.1598	15.142	20.45
NCLIV_016920	NCLIV_016920	hypothetical+protein	FR823387:1219643-1232638	-0.0656262	-1.04654	0.753442	0.907539	58.5282	46.5899	79.5397	46.3079	24.9005	33.6294
NCLIV_016930	NCLIV_016930	hypothetical+protein	FR823387:1234886-1236979	-1.63748	-3.11123	0.00056283	0.00378819	15.2907	12.1718	20.7801	3.98611	2.1434	2.89477
NCLIV_016940	NCLIV_016940	conserved+hypothetical+protein	FR823387:1238506-1239307	0.171935	1.12657	0.482877	0.7031	30.7788	24.5007	41.8283	28.731	15.4491	20.8648
NCLIV_016950	NCLIV_016950	putative+dynein+light+chain	FR823387:1240694-1242075	0	1	1	1	0	0	0	0	0	0
NCLIV_016960	NCLIV_016960	conserved+hypothetical+protein	FR823387:1244072-1247073	-1.05282	-2.07458	0.20886	0.414361	3.48885	2.77721	4.74134	1.32847	0.714341	0.964753
NCLIV_016970	NCLIV_016970	conserved+hypothetical+protein	FR823387:1251312-1253051	-0.611691	-1.52805	1.51881e-06	2.04778e-05	249.419	198.544	338.961	135.132	72.6629	98.1348
NCLIV_016990	NCLIV_016990	Cupin+4+family+protein,+related	FR823387:1258644-1265388	-0.836618	-1.78586	0.000104575	0.000886037	67.0482	53.3721	91.1184	31.0368	16.689	22.5394
NCLIV_017000	NCLIV_017000	putative+PAK1+interacting+protein	FR823387:1267617-1272423	0.1493	1.10903	0.486401	0.706021	44.0007	35.0257	59.7969	40.4256	21.7375	29.3576
NCLIV_017010	NCLIV_017010	Lysophosphatidic+acid+acyltransferase,+related	FR823387:1273906-1277435	-0.469736	-1.38486	0.0110584	0.0477151	77.5103	61.7002	105.336	46.3167	24.9053	33.6358
NCLIV_017020	NCLIV_017020	hypothetical+protein	FR823387:1278839-1288937	-0.276399	-1.21117	0.0217472	0.0817153	269.454	214.492	366.188	184.219	99.0576	133.782
NCLIV_017030	NCLIV_017030	conserved+hypothetical+protein	FR823387:1293420-1298122	2.19522	4.57958	0.160461	0.34968	0	0	0	0.441952	0.237645	0.320951
NCLIV_017040	NCLIV_017040	Phosphofructokinase,+related	FR823387:1312764-1325697	0.109585	1.07892	0.424113	0.647724	145.169	115.558	197.284	129.717	69.7511	94.2023
NCLIV_017050	NCLIV_017050	unspecified+product	FR823387:1330306-1335638	0.615256	1.53183	0.285607	0.51499	4.12049	3.28001	5.59974	5.29298	2.84612	3.84383
NCLIV_017060	NCLIV_017060	putative+C2+domain-containing+protein	FR823387:1341946-1359278	0.460378	1.3759	0.000153432	0.00122878	196.964	156.788	267.673	224.475	120.704	163.017
NCLIV_017070	NCLIV_017070	putative+molybdenum+cofactor+biosynthesis+protein+c	FR823387:1361895-1363004	0.375433	1.29723	0.138178	0.322229	30.9137	24.6081	42.0117	33.2462	17.877	24.1438
NCLIV_017080	NCLIV_017080	conserved+hypothetical+protein	FR823387:1365035-1366798	-0.58241	-1.49735	0.0841094	0.224774	20.909	16.6441	28.4153	11.5228	6.19598	8.36798
NCLIV_017090	NCLIV_017090	hypothetical+protein	FR823387:1368506-1370266	0.32264	1.25062	0.00796649	0.0363514	191.398	152.358	260.11	198.26	106.608	143.979
NCLIV_0171	NCLIV_0171	K++channel+tetramerisation+domain-containing+protein	FR823387:1394569-1397520	-0.378506	-1.29999	0.158197	0.34968	36.9841	29.4403	50.2614	23.5305	12.6527	17.0882
NCLIV_017100	NCLIV_017100	conserved+hypothetical+protein	FR823387:1374914-1380317	-0.671662	-1.59291	0.00246846	0.0135929	55.9371	44.5274	76.0185	29.0357	15.613	21.0861
NCLIV_017110	NCLIV_017110	conserved+hypothetical+protein	FR823387:1384065-1391926	0.205124	1.15279	0.140583	0.326436	187.58	149.319	254.921	179.098	96.304	130.063
NCLIV_017130	NCLIV_017130	conserved+hypothetical+protein	FR823387:1398995-1399720	0.335608	1.26191	0.0148275	0.0603965	126.312	100.548	171.658	132.033	70.9963	95.884
NCLIV_017140	NCLIV_017140	hypothetical+protein	FR823387:1402494-1403057	0.079496	1.05665	0.664786	0.854208	72.9083	58.0369	99.0824	63.8066	34.3099	46.3372
NCLIV_017150	NCLIV_017150	conserved+hypothetical+protein	FR823387:1407257-1411411	0	1	1	1	0	0	0	0	0	0
NCLIV_017160	NCLIV_017160	conserved+hypothetical+protein	FR823387:1414452-1415645	-1.64226	-3.12154	0.334808	0.555356	0.316536	0.25197	0.430172	0	0	0
NCLIV_017170	NCLIV_017170	putative+DEAD/DEAH+box+helicase	FR823387:1419409-1428456	0.0123255	1.00858	0.949149	1	60.2805	47.9848	81.9212	50.3503	27.0742	36.5651
NCLIV_017180	NCLIV_017180	hypothetical+protein	FR823387:1429863-1435722	-0.192502	-1.14274	0.415541	0.640007	43.5786	34.6897	59.2233	31.5657	16.9734	22.9235
NCLIV_017190	NCLIV_017190	putative+hemolysin	FR823387:1437931-1441132	-0.384202	-1.30514	0.0728919	0.202827	55.1173	43.8748	74.9044	34.9446	18.7903	25.3773
NCLIV_017200	NCLIV_017200	putative+KH+domain-containing+protein	FR823387:1449260-1454047	0.388373	1.30892	0.00424402	0.0215555	130.566	103.934	177.439	141.568	76.1235	102.809
NCLIV_017210	NCLIV_017210	conserved+hypothetical+protein	FR823387:1462040-1464495	0.0894942	1.064	0.550128	0.764539	110.663	88.0905	150.391	97.5173	52.4367	70.8184
NCLIV_017220	NCLIV_017220	hypothetical+protein	FR823387:1468892-1470642	1.79848	3.47853	3.20453e-06	3.98216e-05	6.33443	5.04237	8.60849	18.5535	9.97652	13.4738
NCLIV_017230	NCLIV_017230	hypothetical+protein	FR823387:1481227-1482186	2.31014	4.95932	0.0143255	0.0587517	0.634583	0.505144	0.862398	3.09565	1.66459	2.24811
NCLIV_017240	NCLIV_017240	conserved+hypothetical+protein	FR823387:1488347-1489228	0.068559	1.04867	0.571003	0.783042	229.49	182.68	311.877	199.306	107.17	144.739
NCLIV_017250	NCLIV_017250	Peptidylprolyl+isomerase+(Cyclophilin)-like+2,related	FR823387:1492476-1494785	0.561429	1.47573	9.18378e-06	0.000102814	163.92	130.485	222.768	200.388	107.752	145.525
NCLIV_017260	NCLIV_017260	putative+C2+domain-containing+protein	FR823387:1498082-1501977	0.202148	1.15041	0.322921	0.555265	56.4119	44.9054	76.6638	53.7623	28.9089	39.0429
NCLIV_017270	NCLIV_017270	conserved+hypothetical+protein	FR823387:1505622-1521661	0.00316007	1.00219	0.982346	1	137.847	109.729	187.333	114.408	61.5193	83.0849
NCLIV_017280	NCLIV_017280	putative+phosphatidylinositolglycan+class+A+protein	FR823387:1525421-1532133	0.552927	1.46706	0.0101917	0.0446759	40.1441	31.9557	54.5557	48.8292	26.2563	35.4604
NCLIV_017290	NCLIV_017290	putative+glutamyl-tRNA+synthetase	FR823387:1533314-1540820	0.17846	1.13168	0.417186	0.641612	43.8241	34.8851	59.5569	41.0885	22.094	29.8391
NCLIV_017300	NCLIV_017300	putative+3',+5'-cyclic+nucleotide+phosphodiesterase	FR823387:1542780-1555203	2.90667	7.49887	2.04809e-47	5.87328e-45	19.7747	15.7411	26.8738	123.611	66.4678	89.768
NCLIV_017310	NCLIV_017310	conserved+hypothetical+protein	FR823387:1560586-1564283	0.341431	1.26701	0.0945638	0.247392	47.7447	38.006	64.885	50.1291	26.9553	36.4044
NCLIV_017320	NCLIV_017320	Similar+to+uniprot|Q12012+Saccharomyces+cerevisiae+YOR289w,+related	FR823387:1568108-1571828	0.568441	1.48292	0.000184916	0.00143469	85.7365	68.2484	116.516	105.349	56.6479	76.5058
NCLIV_017330	NCLIV_017330	tRNA+uridine+5-carboxymethylaminomethyl+modification+enzyme+GidA,+related	FR823387:1576882-1581423	-0.00878172	-1.00611	0.974237	1	27.7414	22.0829	37.7006	22.8338	12.2781	16.5822
NCLIV_017340	NCLIV_017340	hypothetical+protein	FR823387:1582167-1587807	-0.836748	-1.78602	0.000282443	0.00206756	55.4508	44.1402	75.3576	25.6572	13.7963	18.6326
NCLIV_017350	NCLIV_017350	conserved+hypothetical+protein	FR823387:1589088-1599025	-0.242349	-1.18292	0.199032	0.400387	68.2011	54.2899	92.6853	47.7275	25.6639	34.6603
NCLIV_017360	NCLIV_017360	hypothetical+protein	FR823387:1600974-1616641	-1.14825	-2.21644	0.000607538	0.00404447	28.7509	22.8864	39.0724	10.6732	5.73917	7.75104
NCLIV_017370	NCLIV_017370	putative+CAMP-dependent+protein+kinase+regulatory+subunit	FR823387:1619052-1624271	0.120367	1.08701	0.203752	0.406826	881.701	701.857	1198.23	793.718	426.796	576.409
NCLIV_017380	NCLIV_017380	Vesicle+transport+v-SNARE+domain-containing+protein,+related	FR823387:1630300-1633599	0.849618	1.80202	2.92363e-12	1.06856e-10	158.32	126.027	215.157	236.364	127.097	171.651
NCLIV_017390	NCLIV_017390	putative+zinc+finger+(CCCH+type)+protein	FR823387:1637442-1638476	0.471892	1.38693	1.25302e-05	0.000134424	438.211	348.828	595.529	503.365	270.668	365.55
NCLIV_017400	NCLIV_017400	conserved+hypothetical+protein	FR823387:1639570-1640511	0.384828	1.3057	0.000130279	0.00106989	597.055	475.272	811.398	645.639	347.171	468.871
NCLIV_017410	NCLIV_017410	unspecified+product	FR823387:1643205-1644881	-0.333778	-1.26031	0.602483	0.811667	4.74659	3.77841	6.45061	3.09325	1.66329	2.24636
NCLIV_017420	NCLIV_017420	unspecified+product	FR823387:1647494-1649155	1.031	2.04344	4.03385e-07	6.10069e-06	38.8758	30.9461	52.8321	65.9153	35.4438	47.8686
NCLIV_017430	NCLIV_017430	unspecified+product	FR823387:1651507-1653183	0.0648398	1.04597	0.935037	1	2.56124	2.03881	3.48072	2.22461	1.19621	1.61554
NCLIV_017440	NCLIV_017440	unspecified+product	FR823387:1655296-1656966	0.0977045	1.07007	0.401602	0.627219	323.091	257.189	439.081	286.322	153.96	207.931
NCLIV_017450	NCLIV_017450	conserved+hypothetical+protein	FR823387:1658894-1667430	-0.526541	-1.44047	0.00254575	0.0139171	91.5012	72.8373	124.35	52.5671	28.2662	38.1749
NCLIV_017460	NCLIV_017460	putative+NUDIX+hydrolase+domain-containing+protein	FR823387:1671794-1673235	0.303691	1.2343	0.0571099	0.167907	90.7292	72.2228	123.301	92.7685	49.8832	67.3697
NCLIV_017470	NCLIV_017470	Proteasome+subunit+alpha+type,related	FR823387:1676132-1680697	-0.386846	-1.30753	0.00368861	0.0190459	206.585	164.447	280.748	130.813	70.3406	94.9985
NCLIV_017480	NCLIV_017480	Dihydrodipicolinate+synthase,+related	FR823387:1683624-1685321	0	1	1	1	0	0	0	0	0	0
NCLIV_017490	NCLIV_017490	putative+B-box+zinc+finger+protein	FR823387:1689317-1700410	-0.699287	-1.6237	0.00107537	0.0066046	74.335	59.1725	101.021	37.8636	20.3599	27.497
NCLIV_0175	NCLIV_0175	elongation+of+very+long+chain+fatty+acids+4+protein	FR823387:1735947-1772934	-0.000102711	-1.00007	0.999647	1	67.1942	53.4883	91.3169	55.6431	29.9203	40.4088
NCLIV_017500	NCLIV_017500	hypothetical+protein	FR823387:1705206-1706325	-0.173808	-1.12803	0.0478226	0.147585	2061.87	1641.31	2802.09	1513.71	813.945	1099.27
NCLIV_017510	NCLIV_017510	putative+40S+ribosomal+protein+S29	FR823387:1707822-1709099	0.0365608	1.02567	0.690509	0.870845	1177.35	937.205	1600.02	1000.04	537.741	726.245
NCLIV_017520	NCLIV_017520	putative+TPR+Domain+containing+protein	FR823387:1710809-1721418	0.827178	1.77421	0.123123	0.296513	4.44053	3.53477	6.03467	6.62031	3.55985	4.80776
NCLIV_017530	NCLIV_017530	conserved+hypothetical+protein	FR823387:1729489-1733574	1.06404	2.09078	0.131472	0.310601	2.21519	1.76335	3.01044	3.96998	2.13473	2.88305
NCLIV_017550	NCLIV_017550	hypothetical+protein	FR823387:1742665-1746217	0	1	1	1	0	0	0	0	0	0
NCLIV_017560	NCLIV_017560	Calcium-dependent+protein+kinase+2,+related	FR823387:1748249-1754076	0	1	1	1	0	0	0	0	0	0
NCLIV_017580	NCLIV_017580	conserved+hypothetical+protein	FR823387:1775094-1788048	-0.403549	-1.32276	0.00813061	0.0370097	127.055	101.139	172.668	79.5163	42.7573	57.7458
NCLIV_017590	NCLIV_017590	Mitochondrial+carrier+protein-like,+related	FR823387:1791121-1794746	0.0992756	1.07124	0.593386	0.805148	65.6598	52.2669	89.2316	58.2573	31.3259	42.3072
NCLIV_0176	NCLIV_0176	iron+only+hydrogenase+large+subunit,+C-terminal+domain-containing+protein	FR823387:1807184-1810108	0.264006	1.20081	0.169018	0.362727	60.1662	47.8939	81.7659	59.8559	32.1855	43.4681
NCLIV_017600	NCLIV_017600	conserved+hypothetical+protein	FR823387:1800045-1803881	-0.604849	-1.52082	0.0119892	0.0510224	44.0152	35.0373	59.8167	23.9252	12.865	17.3748
NCLIV_017620	NCLIV_017620	conserved+hypothetical+protein	FR823387:1810993-1812240	-0.0492749	-1.03474	0.953933	1	2.20949	1.75881	3.0027	1.76391	0.948486	1.28098
NCLIV_017630	NCLIV_017630	6-phosphogluconate+dehydrogenase,+decarboxylating,+related	FR823387:1829010-1831524	1.05587	2.07897	0.291453	0.521784	0.953684	0.759157	1.29606	1.77534	0.954631	1.28928
NCLIV_017640	NCLIV_017640	putative+WD+domain,+G-beta+repeat-containing+protein	FR823387:1834109-1838166	-0.091732	-1.06565	0.678197	0.861437	44.8092	35.6693	60.8957	34.8146	18.7204	25.2828
NCLIV_017650	NCLIV_017650	hypothetical+protein	FR823387:1839754-1875102	0.0153487	1.0107	0.90594	0.997813	216.372	172.238	294.05	181.105	97.3831	131.521
NCLIV_017660	NCLIV_017660	conserved+hypothetical+protein	FR823387:1875990-1889225	0.0262527	1.01836	0.841385	0.96459	169.559	134.974	230.431	143	76.8938	103.849
NCLIV_017670	NCLIV_017670	conserved+hypothetical+protein	FR823387:1894778-1895515	-0.520917	-1.43487	0.104565	0.264912	24.7214	19.6789	33.5964	14.2299	7.65167	10.334
NCLIV_017680	NCLIV_017680	hypothetical+protein	FR823387:1897131-1905129	0.128399	1.09308	0.336391	0.556745	182.376	145.176	247.848	165.104	88.779	119.9
NCLIV_017690	NCLIV_017690	conserved+hypothetical+protein	FR823387:1908066-1912862	1.92782	3.8048	6.20255e-40	1.2499e-37	60.0298	47.7853	81.5805	189.496	101.895	137.615
NCLIV_017700	NCLIV_017700	putative+60S+ribosomal+protein+L24	FR823387:1914932-1917263	0.212114	1.15838	0.152559	0.34658	105.66	84.1077	143.591	101.38	54.5136	73.6233
NCLIV_017710	NCLIV_017710	conserved+hypothetical+protein	FR823387:1918582-1928850	0.738292	1.6682	1.98825e-08	4.05039e-07	144.434	114.973	196.286	199.619	107.338	144.966
NCLIV_017720	NCLIV_017720	hypothetical+protein	FR823387:1935450-1941555	0.150448	1.10991	0.407096	0.631195	72.2048	57.4769	98.1263	66.3828	35.6952	48.2081
NCLIV_017730	NCLIV_017730	Guanylate+kinase,+related	FR823387:1945052-1947560	0.329869	1.2569	0.0365753	0.12218	91.7849	73.0631	124.736	95.5695	51.3894	69.4039
NCLIV_017740	NCLIV_017740	conserved+hypothetical+protein	FR823387:1951018-1951668	0	1	1	1	0	0	0	0	0	0
NCLIV_017750	NCLIV_017750	conserved+hypothetical+protein	FR823387:1954471-1970344	-1.64226	-3.12154	0.334808	0.555356	0.316536	0.25197	0.430172	0	0	0
NCLIV_017760	NCLIV_017760	conserved+hypothetical+protein	FR823387:1970991-1984346	-0.98945	-1.98543	0.0896244	0.236461	7.57359	6.02877	10.2925	3.09727	1.66546	2.24928
NCLIV_017770	NCLIV_017770	conserved+hypothetical+protein	FR823387:1987856-2006321	0.0763199	1.05433	0.603466	0.811667	151.189	120.35	205.466	132.015	70.9868	95.8712
NCLIV_017780	NCLIV_017780	putative+Trichohyalin	FR823387:2010781-2029634	-0.315956	-1.24484	0.0620121	0.179141	98.5544	78.4519	133.935	65.5396	35.2418	47.5957
NCLIV_017790	NCLIV_017790	putative+TGF-beta-inducible+nuclear+protein+1	FR823387:2031875-2033267	0.0193765	1.01352	0.936954	1	35.3013	28.1007	47.9744	29.6308	15.933	21.5183
NCLIV_017800	NCLIV_017800	hypothetical+protein	FR823387:2036358-2036992	-1.73362	-3.3256	0.00422929	0.0214953	9.22357	7.3422	12.5348	2.21051	1.18863	1.6053
NCLIV_017810	NCLIV_017810	conserved+hypothetical+protein	FR823387:2037745-2040331	-0.954938	-1.9385	0.0112457	0.0482717	18.7124	14.8956	25.4302	7.93459	4.26657	5.76221
NCLIV_017820	NCLIV_017820	hypothetical+protein	FR823387:2044114-2044782	0.304545	1.23503	0.00992505	0.0436843	262.182	208.704	356.305	268.182	144.206	194.758
NCLIV_017830	NCLIV_017830	putative+5'-3'+exonuclease	FR823387:2047386-2061136	0.677416	1.59927	3.27367e-05	0.000314542	71.2911	56.7496	96.8846	94.4947	50.8114	68.6234
NCLIV_017840	NCLIV_017840	conserved+hypothetical+protein	FR823387:2065437-2065796	0.321183	1.24935	0.00630506	0.029829	276.233	219.889	375.401	285.833	153.697	207.576
NCLIV_017850	NCLIV_017850	putative+plectin	FR823387:2075455-2079184	-0.946655	-1.9274	1.16484e-05	0.000126604	71.4141	56.8474	97.0517	30.6241	16.4671	22.2396
NCLIV_017860	NCLIV_017860	conserved+hypothetical+protein	FR823387:2083565-2091757	0.0304886	1.02136	0.865013	0.980088	71.1266	56.6186	96.6611	60.1637	32.351	43.6917
NCLIV_017870	NCLIV_017870	hypothetical+protein	FR823387:2093150-2096321	-0.522733	-1.43667	0.120192	0.291811	20.6905	16.4701	28.1183	11.8897	6.39332	8.63449
NCLIV_017880	NCLIV_017880	conserved+hypothetical+protein	FR823387:2099111-2116688	0.00195958	1.00136	0.990269	1	95.2937	75.8562	129.504	79.0251	42.4931	57.3891
NCLIV_017890	NCLIV_017890	unspecified+product	FR823387:2118858-2120114	2.19718	4.58583	0.16028	0.34968	0	0	0	0.442555	0.23797	0.32139
NCLIV_017900	NCLIV_017900	unspecified+product	FR823387:2122038-2123270	0	1	1	1	0	0	0	0	0	0
NCLIV_017910	NCLIV_017910	unspecified+product	FR823387:2125193-2126422	0	1	1	1	0	0	0	0	0	0
NCLIV_017911	NCLIV_017911	hypothetical+protein	FR823387:2127884-2129068	0	1	1	1	0	0	0	0	0	0
NCLIV_017920	NCLIV_017920	unspecified+product	FR823387:2130077-2131258	0	1	1	1	0	0	0	0	0	0
NCLIV_017930	NCLIV_017930	unspecified+product	FR823387:2132301-2133476	2.19522	4.57958	0.160461	0.34968	0	0	0	0.441952	0.237645	0.320951
NCLIV_017940	NCLIV_017940	unspecified+product	FR823387:2135428-2136675	0	1	1	1	0	0	0	0	0	0
NCLIV_017941	NCLIV_017941	unspecified+product	FR823387:2137554-2138852	0	1	1	1	0	0	0	0	0	0
NCLIV_017950	NCLIV_017950	unspecified+product	FR823387:2140805-2142049	0	1	1	1	0	0	0	0	0	0
NCLIV_017951	NCLIV_017951	unspecified+product	FR823387:2143935-2145203	0	1	1	1	0	0	0	0	0	0
NCLIV_017970	NCLIV_017970	unspecified+product	FR823387:2148381-2149529	-1.64226	-3.12154	0.334808	0.555356	0.316536	0.25197	0.430172	0	0	0
NCLIV_017980	NCLIV_017980	unspecified+product	FR823387:2151546-2152565	-1.64645	-3.13063	0.334245	0.555356	0.31746	0.252706	0.431428	0	0	0
NCLIV_017990	NCLIV_017990	conserved+hypothetical+protein	FR823387:2155303-2160061	-0.74747	-1.67885	1.52259e-09	3.80955e-08	331.476	263.863	450.476	163.46	87.8951	118.707
NCLIV_0180	NCLIV_0180	Atypical+MEK-related+kinase+(incomplete+catalytic+triad)	FR823387:2269755-2276039	0.217649	1.16284	0.150269	0.342736	102.43	81.5368	139.202	98.659	53.0506	71.6475
NCLIV_018000	NCLIV_018000	YALI0F09812p,+related	FR823387:2164807-2169574	0.216649	1.16203	0.0963709	0.24958	163.377	130.052	222.029	157.242	84.5518	114.191
NCLIV_018010	NCLIV_018010	hypothetical+protein	FR823387:2174848-2181122	0.0776358	1.05529	0.658424	0.849491	71.9008	57.2349	97.7131	62.8433	33.7919	45.6377
NCLIV_018020	NCLIV_018020	hypothetical+protein	FR823387:2182955-2199547	0.483528	1.39816	2.15831e-05	0.000218306	286.941	228.412	389.952	332.29	178.678	241.314
NCLIV_018030	NCLIV_018030	putative+BRCA2+repeat-containing+protein	FR823387:2204580-2214306	0.264086	1.20087	0.28176	0.511393	33.2176	26.4421	45.1427	33.0581	17.7759	24.0073
NCLIV_018040	NCLIV_018040	hypothetical+protein	FR823387:2214846-2224616	-0.176961	-1.1305	0.432686	0.655916	42.7654	34.0424	58.1182	31.3135	16.8378	22.7403
NCLIV_018050	NCLIV_018050	conserved+hypothetical+protein	FR823387:2226332-2228816	-0.249999	-1.18921	0.125063	0.300119	103.162	82.1198	140.197	71.8212	38.6195	52.1575
NCLIV_018060	NCLIV_018060	conserved+hypothetical+protein	FR823387:2233144-2245587	-0.618668	-1.53546	0.0247874	0.0901976	35.1195	27.9561	47.7274	18.8984	10.162	13.7243
NCLIV_018070	NCLIV_018070	conserved+hypothetical+protein	FR823387:2248616-2253301	0.416885	1.33504	0.00402959	0.0206209	117.291	93.3665	159.398	129.719	69.7523	94.204
NCLIV_018080	NCLIV_018080	conserved+hypothetical+protein	FR823387:2259352-2268254	-1.34657	-2.54307	0.27227	0.499028	1.59134	1.26674	2.16263	0.443092	0.238258	0.321779
NCLIV_0181	NCLIV_0181	OTU-like+cysteine+protease+domain-containing+protein	FR823387:2328543-2333928	0.562369	1.47669	1.35572e-05	0.000143249	297.791	237.049	404.697	364.232	195.854	264.51
NCLIV_018100	NCLIV_018100	hypothetical+protein	FR823387:2279883-2285050	0.137574	1.10005	0.303341	0.535443	156.423	124.517	212.579	142.513	76.6316	103.495
NCLIV_018110	NCLIV_018110	hypothetical+protein	FR823387:2285862-2298488	2.12672	4.36724	2.32522e-31	3.2711e-29	35.1539	27.9834	47.7741	127.557	68.5897	92.6338
NCLIV_018120	NCLIV_018120	conserved+hypothetical+protein	FR823387:2304665-2309814	0.558157	1.47239	5.46467e-08	1.00356e-06	473.266	376.732	643.168	577.132	310.334	419.121
NCLIV_018130	NCLIV_018130	conserved+hypothetical+protein	FR823387:2310564-2311562	-0.551825	-1.46594	0.0430946	0.138796	41.1341	32.7438	55.9012	23.1985	12.4742	16.847
NCLIV_018140	NCLIV_018140	putative+PX+domain-containing+protein	FR823387:2313777-2319704	-0.145193	-1.10588	0.478578	0.698429	57.87	46.066	78.6452	43.3255	23.2969	31.4636
NCLIV_018150	NCLIV_018150	CBR-FKB-6+protein,+related	FR823387:2323366-2325903	-0.192969	-1.14311	0.268241	0.494673	83.0153	66.0823	112.818	60.126	32.3308	43.6643
NCLIV_018170	NCLIV_018170	Bromodomain+containing+protein,+related	FR823387:2337890-2344566	-0.135748	-1.09866	0.405793	0.6302	101.895	81.1107	138.475	76.7936	41.2932	55.7685
NCLIV_018180	NCLIV_018180	putative+Ras+family+domain-containing+protein	FR823387:2347171-2350450	-1.27961	-2.42774	5.66153e-06	6.63717e-05	39.0103	31.0532	53.015	13.2346	7.11647	9.61115
NCLIV_018190	NCLIV_018190	conserved+hypothetical+protein	FR823387:2353167-2359964	0.578759	1.49356	1.7259e-09	4.24697e-08	1438.96	1145.45	1955.54	1779.88	957.072	1292.57
NCLIV_018200	NCLIV_018200	conserved+hypothetical+protein	FR823387:2366009-2369707	-1.64645	-3.13063	0.334245	0.555356	0.31746	0.252706	0.431428	0	0	0
NCLIV_018210	NCLIV_018210	putative+50S+ribosomal+protein+L3	FR823387:2370993-2374124	0.0348173	1.02443	0.901799	0.996097	25.3962	20.216	34.5134	21.549	11.5873	15.6492
NCLIV_018220	NCLIV_018220	Mitochondrial+protein-like,+related	FR823387:2376231-2384050	0.259512	1.19707	0.292755	0.523072	31.236	24.8646	42.4496	30.9892	16.6634	22.5048
NCLIV_018230	NCLIV_018230	putative+CAM+kinase,+SNF1/AMK1+family+ToxPK1	FR823387:2386650-2391935	1.16567	2.24337	0.143954	0.331375	1.58265	1.25983	2.15082	3.09341	1.66338	2.24647
NCLIV_018240	NCLIV_018240	Similar+to+uniprot|P38747+Saccharomyces+cerevisiae+YHL013c,+related	FR823387:2393384-2397339	-0.235934	-1.17767	0.272497	0.499199	50.3224	40.0579	68.388	35.368	19.018	25.6847
NCLIV_018250	NCLIV_018250	putative+PPR+repeat-containing+protein	FR823387:2400005-2404985	0.142521	1.10383	0.553193	0.767084	34.4934	27.4576	46.8765	31.5435	16.9615	22.9073
NCLIV_018260	NCLIV_018260	putative+U4/U6+small+nuclear+ribonucleoprotein	FR823387:2406762-2410342	0.190431	1.1411	0.344573	0.565346	56.291	44.8091	76.4995	53.2109	28.6124	38.6425
NCLIV_018270	NCLIV_018270	hypothetical+protein	FR823387:2420340-2422486	2.19522	4.57958	0.160461	0.34968	0	0	0	0.441952	0.237645	0.320951
NCLIV_018280	NCLIV_018280	conserved+hypothetical+protein	FR823387:2424828-2428279	2.19718	4.58583	0.16028	0.34968	0	0	0	0.442555	0.23797	0.32139
NCLIV_018290	NCLIV_018290	Ribosomal+protein+S26E,+related	FR823387:2429773-2431095	0.0999793	1.07176	0.274815	0.502697	1143.49	910.25	1554.01	1014.94	545.748	737.06
NCLIV_018300	NCLIV_018300	HIT+family+protein,+related	FR823387:2432091-2433749	-0.270546	-1.20626	0.0718018	0.201034	133.555	106.314	181.502	91.6691	49.2921	66.5714
NCLIV_018310	NCLIV_018310	endonuclease/exonuclease/phosphatase+domain-containing+protein	FR823387:2435059-2443543	-0.0881359	-1.063	0.710179	0.880067	36.8268	29.3151	50.0476	28.6834	15.4235	20.8303
NCLIV_018320	NCLIV_018320	putative+acetyltransferase+domain-containing+protein	FR823387:2447532-2449085	-0.317296	-1.24599	0.237313	0.453577	30.7368	24.4673	41.7713	20.4042	10.9717	14.8178
NCLIV_018330	NCLIV_018330	putative+DNA+methyltransferase	FR823387:2451653-2455405	-0.417622	-1.33572	0.0316352	0.108797	73.6222	58.6052	100.053	45.6145	24.5277	33.1259
NCLIV_018340	NCLIV_018340	Breast+carcinoma+amplified+sequence+2,+related	FR823387:2457277-2460629	-0.098013	-1.0703	0.552136	0.766046	92.7313	73.8165	126.022	71.7417	38.5768	52.0998
NCLIV_018350	NCLIV_018350	conserved+hypothetical+protein	FR823387:2462989-2473522	0.0760015	1.05409	0.822044	0.95401	17.2324	13.7174	23.4188	15.0481	8.0916	10.9281
NCLIV_018360	NCLIV_018360	glucose-methanol-choline+domain-containing+protein	FR823387:2476520-2482809	-0.239708	-1.18075	0.75306	0.907226	3.16435	2.51891	4.30035	2.20074	1.18338	1.59821
NCLIV_018370	NCLIV_018370	conserved+hypothetical+protein	FR823387:2484970-2485440	0	1	1	1	0	0	0	0	0	0
NCLIV_018380	NCLIV_018380	putative+dihydrodipicolinate+reductase	FR823387:2494798-2496946	-1.30142	-2.46472	4.04587e-06	4.91302e-05	39.6108	31.5312	53.831	13.2359	7.11717	9.6121
NCLIV_018390	NCLIV_018390	conserved+hypothetical+protein	FR823387:2498256-2499841	0.24859	1.18805	0.05555	0.164423	179.232	142.673	243.576	176.363	94.8333	128.077
NCLIV_0184	NCLIV_0184	peroxisomal+biogenesis+factor+11+domain-containing+protein	FR823387:2513744-2517093	1.17693	2.26095	0.0735884	0.20412	2.52833	2.01261	3.43599	4.88826	2.6285	3.54992
NCLIV_018400	NCLIV_018400	putative+TCP-1/cpn60+family+chaperonin	FR823387:2505182-2511667	-0.44696	-1.36317	0.000254474	0.001889	295.883	235.531	402.105	179.72	96.6385	130.515
NCLIV_018420	NCLIV_018420	unspecified+product	FR823387:2520353-2522735	0.66052	1.58065	2.32395e-12	8.62865e-11	1547.93	1232.19	2103.63	2026.31	1089.58	1471.54
NCLIV_018430	NCLIV_018430	WD-repeat+protein,+related	FR823387:2526050-2532402	0.220558	1.16518	0.702043	0.878998	5.03961	4.01166	6.84882	4.88192	2.62509	3.54532
NCLIV_018440	NCLIV_018440	conserved+hypothetical+protein	FR823387:2537346-2542501	0.514115	1.42812	0.0444567	0.141965	26.7443	21.2891	36.3454	31.6839	17.037	23.0093
NCLIV_018450	NCLIV_018450	hypothetical+protein	FR823387:2543011-2543757	0.673924	1.59541	0.116881	0.286383	7.61875	6.06472	10.3539	10.1401	5.4525	7.36387
NCLIV_018460	NCLIV_018460	conserved+hypothetical+protein	FR823387:2547038-2549608	-1.19506	-2.28955	4.10538e-05	0.000381667	38.3057	30.4923	52.0574	13.7853	7.41262	10.0111
NCLIV_018470	NCLIV_018470	hypothetical+protein	FR823387:2552707-2554715	-0.537946	-1.4519	0.0619475	0.179093	29.5934	23.5571	40.2175	16.8411	9.05572	12.2302
NCLIV_018480	NCLIV_018480	conserved+hypothetical+protein	FR823387:2558406-2561297	-0.126122	-1.09136	0.468519	0.68731	77.5268	61.7133	105.359	58.8185	31.6277	42.7148
NCLIV_018490	NCLIV_018490	conserved+hypothetical+protein	FR823387:2565046-2565777	0.0176934	1.01234	0.951902	1	24.3497	19.383	33.0912	20.4159	10.978	14.8263
NCLIV_018500	NCLIV_018500	Fatty+acyl-CoA+synthetase+2,+related	FR823387:2570355-2580755	-0.157456	-1.11532	0.172052	0.36411	322.9	257.037	438.821	239.746	128.915	174.107
NCLIV_018510	NCLIV_018510	Hydrolase+Cof,+related	FR823387:2583404-2584363	0.317257	1.24596	0.00468456	0.023332	286.165	227.794	388.898	295.303	158.79	214.453
NCLIV_018520	NCLIV_018520	putative+DNA+replication+licensing+factor	FR823387:2586982-2596034	-0.58303	-1.49799	8.6756e-07	1.22976e-05	348.585	277.483	473.727	192.669	103.602	139.919
NCLIV_018530	NCLIV_018530	conserved+hypothetical+protein	FR823387:2598046-2602381	0.627016	1.54437	1.5438e-11	5.2321e-10	1079.59	859.379	1467.16	1380.81	742.485	1002.76
NCLIV_018540	NCLIV_018540	conserved+hypothetical+protein	FR823387:2607650-2609074	-0.887708	-1.85023	0.000212313	0.00162449	55.5879	44.2494	75.5439	24.8229	13.3477	18.0267
NCLIV_018550	NCLIV_018550	YGR231Cp-like+protein,+related	FR823387:2610497-2613237	-0.160835	-1.11793	0.307444	0.538099	101.222	80.5754	137.561	74.9696	40.3124	54.4439
NCLIV_018560	NCLIV_018560	putative+ras-GTPase-activating+protein+binding+protein	FR823387:2617424-2621768	-0.135798	-1.0987	0.319599	0.551859	248.531	197.837	337.754	187.319	100.725	136.034
NCLIV_018570	NCLIV_018570	conserved+hypothetical+protein	FR823387:2627841-2635031	-0.222074	-1.16641	0.485449	0.70542	22.674	18.0491	30.814	16.0791	8.646	11.6768
NCLIV_018580	NCLIV_018580	conserved+hypothetical+protein	FR823387:2637286-2637630	0.0150198	1.01047	0.963662	1	17.4388	13.8817	23.6993	14.5941	7.84751	10.5985
NCLIV_018590	NCLIV_018590	hypothetical+protein	FR823387:2639599-2643645	0.227529	1.17083	0.258907	0.482483	55.583	44.2455	75.5373	53.9151	28.9911	39.1539
NCLIV_018600	NCLIV_018600	putative+DEAD/DEAH+box+helicase	FR823387:2646635-2654991	0.243866	1.18416	0.120916	0.293187	91.5551	72.8802	124.423	89.8065	48.2905	65.2187
NCLIV_018610	NCLIV_018610	conserved+hypothetical+protein	FR823387:2656388-2659130	-0.0117803	-1.0082	0.951402	1	69.5936	55.3983	94.5777	57.1626	30.7373	41.5122
NCLIV_018620	NCLIV_018620	Os08g0464000+protein,+related	FR823387:2663078-2664685	-0.407712	-1.32658	0.0446016	0.142176	66.6738	53.0741	90.6097	41.5921	22.3648	30.2048
NCLIV_018630	NCLIV_018630	hypothetical+protein	FR823387:2667873-2670797	3.02346	8.13115	0.0476497	0.147234	0	0	0	0.880922	0.473687	0.639738
NCLIV_018640	NCLIV_018640	69N21,+related	FR823387:2674812-2677568	0	1	1	1	0	0	0	0	0	0
NCLIV_018650	NCLIV_018650	hypothetical+protein	FR823387:2678529-2691193	0.0831253	1.05931	0.637644	0.834816	69.874	55.6215	94.9587	61.3048	32.9646	44.5204
NCLIV_018660	NCLIV_018660	conserved+hypothetical+protein	FR823387:2694328-2700746	-1.05044	-2.07116	0.000937667	0.00590477	29.9759	23.8616	40.7372	11.9217	6.41049	8.65768
NCLIV_018670	NCLIV_018670	putative+ankyrin+repeat-containing+protein	FR823387:2703193-2708067	0.21474	1.1605	0.207972	0.413406	76.5617	60.9451	104.047	73.6003	39.5762	53.4496
NCLIV_018680	NCLIV_018680	conserved+hypothetical+protein	FR823387:2712645-2713987	-0.0272612	-1.01908	0.868521	0.98191	108.539	86.3995	147.504	88.1992	47.4262	64.0515
NCLIV_018690	NCLIV_018690	conserved+hypothetical+protein	FR823387:2715566-2719633	0.16585	1.12183	0.306017	0.536735	92.3347	73.5008	125.483	85.7982	46.1352	62.3078
NCLIV_018700	NCLIV_018700	SnoRNA+binding+domain,+related	FR823387:2725327-2755311	0.490604	1.40503	1.27277e-05	0.000135957	422.204	336.086	573.776	491.313	264.187	356.798
NCLIV_018710	NCLIV_018710	hypothetical+protein	FR823387:2758168-2763378	-0.862761	-1.81852	2.09135e-10	6.04383e-09	218.447	173.889	296.869	99.4239	53.4619	72.203
NCLIV_018720	NCLIV_018720	putative+protamine+P1+protein	FR823387:2764459-2772647	0.182461	1.13482	0.222122	0.432752	104.057	82.8324	141.414	97.8088	52.5934	71.03
NCLIV_018730	NCLIV_018730	conserved+hypothetical+protein	FR823387:2776347-2784612	-0.584304	-1.49932	0.0216895	0.0815929	38.4896	30.6387	52.3074	21.2186	11.4096	15.4093
NCLIV_018740	NCLIV_018740	conserved+hypothetical+protein	FR823387:2787206-2790514	-0.0188952	-1.01318	0.938004	1	35.4857	28.2475	48.225	29.0037	15.5958	21.0629
NCLIV_018750	NCLIV_018750	Kinase-like+protein,+related	FR823387:2792463-2796629	-0.149418	-1.10912	0.567013	0.778859	31.4569	25.0405	42.7499	23.4755	12.6232	17.0482
NCLIV_018760	NCLIV_018760	conserved+hypothetical+protein	FR823387:2798420-2800908	0.226404	1.16992	0.35063	0.572057	32.4146	25.8028	44.0514	31.4261	16.8983	22.8221
NCLIV_018770	NCLIV_018770	hypothetical+protein	FR823387:2809238-2811674	-2.13351	-4.38785	0.0517304	0.156344	2.84717	2.26642	3.8693	0.441912	0.237624	0.320923
NCLIV_018780	NCLIV_018780	unspecified+product	FR823387:2816098-2818275	0.0473789	1.03339	0.911655	1	9.82166	7.8183	13.3476	8.40912	4.52173	6.10682
NCLIV_018790	NCLIV_018790	conserved+hypothetical+protein	FR823387:2828470-2829363	-0.0380302	-1.02671	0.849001	0.968116	66.4787	52.9188	90.3445	53.6172	28.8309	38.9375
NCLIV_0188	NCLIV_0188	adaptin+N+terminal+region+domain-containing+protein	FR823387:2881543-2891186	-0.250571	-1.18968	0.253563	0.47537	50.1434	39.9154	68.1448	34.885	18.7583	25.334
NCLIV_018800	NCLIV_018800	hypothetical+protein	FR823387:2831762-2839083	0.261159	1.19844	0.0471955	0.146929	178.117	141.786	242.062	176.802	95.0694	128.396
NCLIV_018810	NCLIV_018810	conserved+hypothetical+protein	FR823387:2842957-2848176	0.0957834	1.06865	0.621268	0.823644	59.0167	46.9788	80.2037	52.2379	28.0892	37.9358
NCLIV_018820	NCLIV_018820	conserved+hypothetical+protein	FR823387:2852136-2853113	-0.243285	-1.18368	0.405002	0.630162	24.676	19.6427	33.5346	17.2446	9.27271	12.5233
NCLIV_018825	NCLIV_018825	conserved+hypothetical+protein	FR823387:2855460-2858441	-0.30485	-1.23529	0.425138	0.648544	14.5629	11.5925	19.791	9.73915	5.23691	7.0727
NCLIV_018830	NCLIV_018830	conserved+hypothetical+protein	FR823387:2860648-2863747	0.104485	1.07511	0.351727	0.57355	467.18	371.887	634.897	415.959	223.668	302.075
NCLIV_018840	NCLIV_018840	conserved+hypothetical+protein	FR823387:2866980-2867477	1.88262	3.68745	1.90254e-30	2.57915e-28	44.142	35.1381	59.9889	135.13	72.6616	98.1331
NCLIV_018850	NCLIV_018850	putative+ABC+transporter	FR823387:2868660-2875666	0.216495	1.16191	0.127124	0.302726	126.443	100.652	171.836	121.687	65.4334	88.3711
NCLIV_018870	NCLIV_018870	conserved+hypothetical+protein	FR823387:2894764-2903353	-0.807482	-1.75015	0.0509925	0.154868	15.7702	12.5535	21.4317	7.41048	3.98474	5.38159
NCLIV_018880	NCLIV_018880	GTP-binding+protein+1,+related	FR823387:2904625-2907602	-0.225302	-1.16902	0.170624	0.36411	106.295	84.6135	144.455	75.2808	40.4798	54.67
NCLIV_018890	NCLIV_018890	L24,+related	FR823387:2911339-2912447	0.0195895	1.01367	0.824789	0.95574	1475.7	1174.7	2005.48	1238.8	666.124	899.634
NCLIV_018900	NCLIV_018900	conserved+hypothetical+protein	FR823387:2913566-2918209	-0.704278	-1.62933	0.000226558	0.00171801	83.3173	66.3228	113.228	42.3002	22.7455	30.719
NCLIV_018910	NCLIV_018910	putative+DnaJ+domain-containing+protein	FR823387:2921597-2928482	-0.12247	-1.0886	0.568889	0.780861	48.6972	38.7642	66.1794	37.0359	19.9148	26.896
NCLIV_018920	NCLIV_018920	conserved+hypothetical+protein	FR823387:2931552-2935122	-1.64226	-3.12154	0.334808	0.555356	0.316536	0.25197	0.430172	0	0	0
NCLIV_018930	NCLIV_018930	GI15163,+related	FR823387:2938672-2939529	0.0265254	1.01856	0.885329	0.991316	71.3394	56.788	96.9502	60.1769	32.3581	43.7013
NCLIV_018940	NCLIV_018940	conserved+hypothetical+protein	FR823387:2943646-2949154	-0.0383046	-1.02691	0.778193	0.923183	213.697	170.109	290.415	172.331	92.6652	125.149
NCLIV_018950	NCLIV_018950	putative+coatomer+epsilon+subunit	FR823387:2951632-2955986	-0.498392	-1.41264	0.00159639	0.00930622	129.942	103.437	176.591	76.141	40.9423	55.2946
NCLIV_018960	NCLIV_018960	conserved+hypothetical+protein	FR823387:2959572-2961335	-1.20805	-2.31024	0.00367352	0.0190075	17.3591	13.8183	23.5911	6.15301	3.30858	4.4684
NCLIV_018970	NCLIV_018970	conserved+hypothetical+protein	FR823387:2963121-2970647	0.528897	1.44283	9.94817e-07	1.38126e-05	787.809	627.116	1070.63	941.38	506.196	683.643
NCLIV_018980	NCLIV_018980	conserved+hypothetical+protein	FR823387:2972368-2973393	-0.0501699	-1.03539	0.849313	0.968121	28.7636	22.8966	39.0898	23.0016	12.3683	16.7041
NCLIV_018990	NCLIV_018990	putative+16S+pseudouridylate+synthase	FR823387:2975750-2977676	0.0128227	1.00893	0.957942	1	33.8266	26.9268	45.9703	28.2641	15.1981	20.5258
NCLIV_019000	NCLIV_019000	putative+adenosine+transporter	FR823387:2980111-2981844	0.231705	1.17422	0.0255154	0.0922557	712.456	567.133	968.227	692.829	372.546	503.142
NCLIV_019010	NCLIV_019010	putative+protein+phosphatase+2C	FR823387:2986715-2995368	0.955549	1.93932	0.000259451	0.00191722	21.1774	16.8577	28.78	34.1266	18.3504	24.7832
NCLIV_019020	NCLIV_019020	conserved+hypothetical+protein	FR823387:2998991-3004917	-0.0116888	-1.00813	0.928641	1	217.276	172.957	295.278	178.483	95.9735	129.617
NCLIV_019030	NCLIV_019030	putative+viral+A-type+inclusion+protein+repeat+family	FR823387:3010364-3021141	-0.00466361	-1.00324	0.970747	1	207.77	165.39	282.359	171.507	92.2225	124.551
NCLIV_019040	NCLIV_019040	Peptidase+M16+domain+protein,+related	FR823387:3024131-3028223	-0.192229	-1.14253	0.247364	0.466923	104.677	83.3256	142.256	75.8573	40.7898	55.0886
NCLIV_019050	NCLIV_019050	putative+tubulin-tyrosine+ligase+family+protein	FR823387:3029909-3041381	-0.149415	-1.10912	0.259067	0.48266	183.162	145.802	248.918	136.748	73.5319	99.3085
NCLIV_019060	NCLIV_019060	unspecified+product	FR823387:3047956-3052214	1.90955	3.75691	0.12672	0.302247	0.316536	0.25197	0.430172	1.32469	0.712308	0.962008
NCLIV_019070	NCLIV_019070	Os07g0661100+protein,+related	FR823387:3057113-3062656	-0.17468	-1.12871	0.390903	0.615018	58.9064	46.891	80.0538	43.2055	23.2323	31.3764
NCLIV_019080	NCLIV_019080	hypothetical+protein	FR823387:3064490-3066103	-1.05509	-2.07785	0.404613	0.629942	1.26723	1.00874	1.72216	0.441138	0.237207	0.32036
NCLIV_019090	NCLIV_019090	putative+mitochondrial+carrier+domain-containing+protein	FR823387:3068373-3071516	0.535795	1.44974	0.462359	0.684269	2.52806	2.0124	3.43563	3.09025	1.66168	2.24418
NCLIV_019100	NCLIV_019100	conserved+hypothetical+protein	FR823387:3072376-3074304	-0.346828	-1.27176	0.232126	0.446871	27.3712	21.7882	37.1974	17.7966	9.56955	12.9241
NCLIV_019110	NCLIV_019110	HSP90-like+protein,+related	FR823387:3077525-3080915	0.00521389	1.00362	0.956156	1	1327.21	1056.49	1803.67	1103.09	593.153	801.082
NCLIV_019120	NCLIV_019120	conserved+hypothetical+protein	FR823387:3083165-3089060	-0.112017	-1.08074	0.666457	0.854973	37.0802	29.5168	50.392	28.4067	15.2747	20.6293
NCLIV_019130	NCLIV_019130	hypothetical+protein	FR823387:3091411-3094959	-0.0934721	-1.06693	0.740284	0.898608	25.0232	19.9191	34.0065	19.415	10.4398	14.0994
NCLIV_019140	NCLIV_019140	putative+p60+katanin	FR823387:3095639-3103642	0.322235	1.25027	0.621973	0.823992	3.81517	3.03698	5.18482	3.98137	2.14085	2.89132
NCLIV_019150	NCLIV_019150	conserved+hypothetical+protein	FR823387:3104902-3109289	0.0114683	1.00798	0.948507	1	71.2198	56.6928	96.7876	59.4523	31.9685	43.1751
NCLIV_019160	NCLIV_019160	putative+zinc+finger+(C3HC4+type+RING+finger)+protein	FR823387:3111118-3114281	0.0375883	1.0264	0.888859	0.991364	27.6882	22.0405	37.6282	23.5381	12.6568	17.0937
NCLIV_019170	NCLIV_019170	hypothetical+protein	FR823387:3116315-3120101	2.19238	4.57058	0.160723	0.34968	0	0	0	0.441081	0.237177	0.320319
NCLIV_019180	NCLIV_019180	hypothetical+protein	FR823387:3122177-3128351	0.215188	1.16086	0.212436	0.419205	70.8217	56.3759	96.2467	68.1052	36.6213	49.4589
NCLIV_019190	NCLIV_019190	conserved+hypothetical+protein	FR823387:3130139-3134772	-0.43048	-1.34768	0.0127558	0.0535213	92.307	73.4787	125.445	56.6895	30.4829	41.1687
NCLIV_019200	NCLIV_019200	Eukaryotic+translation+initiation+factor+5,related	FR823387:3138886-3141991	0.00341406	1.00237	0.978359	1	215.199	171.304	292.455	178.637	96.0563	129.729
NCLIV_019210	NCLIV_019210	conserved+hypothetical+protein	FR823387:3148118-3154287	-0.809793	-1.75296	5.70396e-07	8.43824e-06	127.678	101.635	173.514	60.2646	32.4053	43.765
NCLIV_019220	NCLIV_019220	conserved+hypothetical+protein	FR823387:3157317-3158804	0.0824625	1.05882	0.569227	0.781181	127.976	101.872	173.919	112.223	60.3441	81.4977
NCLIV_019230	NCLIV_019230	conserved+hypothetical+protein	FR823387:3160489-3165471	0.216055	1.16155	0.422225	0.646587	24.775	19.7215	33.6692	23.852	12.8256	17.3217
NCLIV_019240	NCLIV_019240	conserved+hypothetical+protein	FR823387:3166899-3168869	-0.0986978	-1.07081	0.405418	0.6302	332.737	264.867	452.189	257.324	138.367	186.872
NCLIV_019250	NCLIV_019250	ATP-NAD/AcoX+kinase,+related	FR823387:3171065-3180511	0.27752	1.21211	0.066998	0.190882	97.4255	77.5532	132.401	97.8223	52.6007	71.0399
NCLIV_019260	NCLIV_019260	hypothetical+protein	FR823387:3183256-3190829	3.93569	15.3025	0.0051642	0.0251662	0	0	0	1.76616	0.949695	1.28261
NCLIV_019270	NCLIV_019270	conserved+hypothetical+protein	FR823387:3192260-3202908	-0.620664	-1.53758	0.0759447	0.208371	19.6807	15.6664	26.7461	10.5574	5.67692	7.66696
NCLIV_019280	NCLIV_019280	hypothetical+protein	FR823387:3206097-3207000	1.15942	2.23367	0.307278	0.537935	0.633434	0.50423	0.860836	1.32396	0.711916	0.961478
NCLIV_019290	NCLIV_019290	conserved+hypothetical+protein	FR823387:3208515-3226288	0.768079	1.703	0.0197814	0.0757138	14.1585	11.2705	19.2414	20.0549	10.7839	14.5642
NCLIV_019300	NCLIV_019300	putative+zinc+knuckle+domain-containing+protein	FR823387:3227869-3230739	-0.0982463	-1.07047	0.601179	0.811288	66.1658	52.6697	89.9192	51.1793	27.52	37.1671
NCLIV_019310	NCLIV_019310	putative+GMC+oxidoreductase	FR823387:3233092-3241142	0.638452	1.55666	0.236053	0.452089	4.7474	3.77906	6.45172	6.18842	3.32762	4.49412
NCLIV_019320	NCLIV_019320	conserved+hypothetical+protein	FR823387:3242475-3246592	-0.161206	-1.11822	0.428446	0.651538	62.838	50.0207	85.3968	46.5225	25.016	33.7853
NCLIV_019330	NCLIV_019330	NADPH:quinone+reductase+and+related+Zn-dependent+oxidoreductases,+related	FR823387:3248407-3253620	-0.356858	-1.28063	0.110986	0.276022	47.127	37.5143	64.0455	30.4483	16.3725	22.1119
NCLIV_019340	NCLIV_019340	putative+DNA-directed+RNA+polymerase+I+largest+subunit	FR823387:3256344-3280074	0.0983791	1.07057	0.447622	0.668442	209.83	167.03	285.159	186.04	100.037	135.105
NCLIV_019350	NCLIV_019350	putative+cyclin+domain+containing+protein	FR823387:3284692-3286151	0	1	1	1	0	0	0	0	0	0
NCLIV_019360	NCLIV_019360	putative+dynein+light+chain+type+1	FR823387:3289812-3291222	0.404254	1.3234	0.658383	0.849491	1.58647	1.26287	2.15601	1.77806	0.956092	1.29125
NCLIV_019370	NCLIV_019370	putative+MIZ+zinc+finger+protein	FR823387:3292758-3297779	-0.75287	-1.68514	0.0041615	0.0212086	40.5044	32.2425	55.0454	19.8548	10.6763	14.4188
NCLIV_019380	NCLIV_019380	hypothetical+protein	FR823388:35768-36136	0.0732331	1.05207	0.745598	0.902397	43.5106	34.6356	59.1309	37.9168	20.3885	27.5357
NCLIV_019390	NCLIV_019390	putative+SNF2+family+N-terminal+domain-containing+protein	FR823388:49286-64354	0.24541	1.18543	0.0281391	0.0996897	311.832	248.226	423.78	306.15	164.622	222.33
NCLIV_019400	NCLIV_019400	N-acetylglucosaminyl+transferase+component+domain+containing+protein	FR823388:67718-73154	0.172443	1.12697	0.295425	0.526078	87.6553	69.7758	119.123	81.8237	43.998	59.4215
NCLIV_019410	NCLIV_019410	GH10224,+related	FR823388:74513-80674	0.0620002	1.04391	0.69996	0.877497	98.0705	78.0666	133.278	84.7882	45.592	61.5743
NCLIV_019420	NCLIV_019420	regulator+of+chromosome+condensation+domain-containing+protein	FR823388:83488-95949	-0.313531	-1.24275	0.0161893	0.064446	219.26	174.537	297.975	146.087	78.5535	106.09
NCLIV_019430	NCLIV_019430	Ubiquitin+carrier+protein,+related	FR823388:97268-98746	0.0875446	1.06256	0.659677	0.850814	56.3633	44.8667	76.5977	49.6043	26.6731	36.0233
NCLIV_019440	NCLIV_019440	putative+enhancer+of+rudimentary	FR823388:103443-104732	0.213892	1.15981	0.189548	0.387516	80.3587	63.9676	109.207	77.2033	41.5135	56.0661
NCLIV_019450	NCLIV_019450	hypothetical+protein	FR823388:110664-112639	-0.370111	-1.29245	0.0227068	0.0843978	107.924	85.9102	146.668	69.1243	37.1693	50.199
NCLIV_019460	NCLIV_019460	hypothetical+protein	FR823388:114126-116882	0.184172	1.13616	0.37815	0.600401	53.6313	42.6919	72.8849	50.4794	27.1436	36.6588
NCLIV_019470	NCLIV_019470	conserved+hypothetical+protein	FR823388:128717-130300	-0.377179	-1.2988	0.112586	0.279349	50.5991	40.2782	68.7641	32.235	17.3333	23.4095
NCLIV_019480	NCLIV_019480	proteasome+A-type+and+B-type+domain-containing+protein	FR823388:131943-135160	-0.56992	-1.48444	1.17872e-05	0.000127555	219.148	174.447	297.822	122.218	65.7188	88.7565
NCLIV_019490	NCLIV_019490	putative+lysine+decarboxylase	FR823388:137897-144528	-0.135928	-1.0988	0.402423	0.628023	95.2637	75.8323	129.463	71.7869	38.6011	52.1326
NCLIV_019500	NCLIV_019500	hypothetical+protein	FR823388:148941-155879	0.176206	1.12991	0.331174	0.555356	65.7312	52.3238	89.3287	61.5223	33.0816	44.6783
NCLIV_019510	NCLIV_019510	conserved+hypothetical+protein	FR823388:159932-162343	-0.186864	-1.13829	0.221861	0.432357	122.494	97.5084	166.469	89.1027	47.9121	64.7076
NCLIV_019520	NCLIV_019520	MGC83258+protein,+related	FR823388:163620-217138	-0.153439	-1.11222	0.278051	0.507255	156.63	124.682	212.861	116.613	62.7046	84.6856
NCLIV_019530	NCLIV_019530	conserved+hypothetical+protein	FR823388:219747-222066	-0.131685	-1.09557	0.567458	0.779328	46.3041	36.8593	62.9273	34.9909	18.8152	25.4109
NCLIV_019540	NCLIV_019540	putative+signal+recognition+particle+protein	FR823388:223983-230934	-0.176811	-1.13038	0.219701	0.429381	144.379	114.929	196.211	105.761	56.8693	76.8048
NCLIV_019550	NCLIV_019550	putative+histidyl-tRNA+synthetase	FR823388:239319-243154	0.0195946	1.01367	0.897505	0.995952	110.923	88.2977	150.745	93.1174	50.0708	67.6231
NCLIV_019560	NCLIV_019560	conserved+hypothetical+protein	FR823388:247036-255705	-0.0876968	-1.06267	0.649733	0.843532	64.9113	51.671	88.2144	50.578	27.1966	36.7304
NCLIV_019570	NCLIV_019570	SRS+domain-containing+protein	FR823388:257605-258147	0	1	1	1	0	0	0	0	0	0
NCLIV_019580	NCLIV_019580	SRS+domain-containing+protein	FR823388:260722-261243	3.81776	14.1013	2.98473e-43	7.17876e-41	6.0316	4.80131	8.19694	72.0568	38.7462	52.3286
NCLIV_019590	NCLIV_019590	Selenophosphate+synthase,+related	FR823388:263677-272196	0.0237323	1.01659	0.869285	0.982326	118.812	94.5775	161.466	100.027	53.7861	72.6408
[truncated: 5,458 more rows]

## Sheet: Differentially expressed genes
Neospora caninum differentially expressed genes in the comparison Nc-Spain1H-infected macrophages versus Nc-Spain7-infected macrophages. Genes were considered as differentially expressed when presented a FoldChange (FC) ≥ 2 and with a false discovery rate (FDR) – adjusted p-value (p adj) ≤ 0.05.
gene_id	gene_name	gene_description	locus	log2FoldChange	FoldChange	pvalue	padj	CCM0.7.8A	CCM0.7.8B	CCM0.7.8C	CCM0.1H.8A	CCM0.1H.8B	CCM0.1H.8C
NCLIV_052460	NCLIV_052460	hypothetical+protein	FR823391:6534197-6534601	-7.71612	-210.273	2.44616e-75	9.59923e-73	143.442	114.184	194.938	0.441966	0.237652	0.320961
NCLIV_014580	NCLIV_014580	Hypothetcial+protein,+related	FR823386:2020476-2030212	-5.63547	-49.7101	5.20628e-06	6.17139e-05	7.2636	5.78201	9.87123	0	0	0
NCLIV_004432	NCLIV_004432	srs+domain-containing+protein	FR823381:1712578-1713735	-5.21431	-37.1247	8.05218e-05	0.000699733	5.38656	4.28784	7.32034	0	0	0
NCLIV_019790	NCLIV_019790	Cation-transporting+ATPase,+related	FR823388:459946-460719	-4.42038	-21.4124	4.88155e-30	6.49944e-28	71.476	56.8967	97.1358	2.64682	1.42324	1.92216
NCLIV_007170	NCLIV_007170	conserved+hypothetical+protein	FR823383:227138-228698	-4.17126	-18.0166	0.00657918	0.0310274	2.53724	2.01971	3.44811	0	0	0
NCLIV_007740	NCLIV_007740	hypothetical+protein	FR823383:692057-694347	-4.16323	-17.9167	0.00677898	0.0318288	2.52313	2.00847	3.42893	0	0	0
NCLIV_005160	NCLIV_005160	putative+ppg3	FR823382:492201-500491	-3.98815	-15.8691	0.0110379	0.047654	2.21721	1.76495	3.01318	0	0	0
NCLIV_007360	NCLIV_007360	conserved+hypothetical+protein	FR823383:393525-394484	-3.98585	-15.8439	0.0110967	0.0478118	2.21368	1.76214	3.00838	0	0	0
NCLIV_023620	NCLIV_023620	SRS+domain-containing+protein	FR823388:3754100-3755690	-3.92827	-15.2239	7.23352e-09	1.59565e-07	18.4517	14.688	25.0758	0.887637	0.477298	0.644614
NCLIV_062060	NCLIV_062060	hypothetical+protein	FR823393:1442229-1450068	-3.28299	-9.73371	0.000506515	0.00346238	6.50367	5.17709	8.83848	0.442168	0.237761	0.321108
NCLIV_067320	NCLIV_067320	conserved+hypothetical+protein	FR823393:5529091-5531220	-3.24685	-9.49293	0.000482318	0.00333905	6.33246	5.0408	8.60581	0.441892	0.237613	0.320908
NCLIV_026210	NCLIV_026210	hypothetical+protein	FR823389:1786932-1787987	-3.14958	-8.87394	4.299e-20	3.72713e-18	53.1892	42.34	72.2841	4.85436	2.61027	3.5253
NCLIV_005420	NCLIV_005420	phosphoglycerate+kinase,+related	FR823382:765400-768763	-2.99157	-7.95341	1.46605e-14	7.00698e-13	39.2401	31.2362	53.3273	3.97771	2.13888	2.88866
NCLIV_014630	NCLIV_014630	Novel+protein+similar+to+quinoid+dihydropteridine+reductase+(QDPR,+zgc:112405),+related	FR823386:2056555-2058013	-2.98272	-7.90474	5.67185e-05	0.00051074	9.485	7.5503	12.8901	0.88551	0.476154	0.64307
NCLIV_023430	NCLIV_023430	putative+WD+domain,+G-beta+repeat-containing+protein	FR823388:3623682-3624608	-2.89187	-7.42231	2.12412e-07	3.41324e-06	16.8255	13.3936	22.8659	1.77024	0.951891	1.28558
NCLIV_034590	NCLIV_034590	conserved+hypothetical+protein	FR823390:3584731-3588668	-2.83359	-7.12844	0.00435694	0.022009	4.71968	3.75699	6.41404	0.441959	0.237649	0.320957
NCLIV_042840	NCLIV_042840	hypothetical+protein	FR823385:3641605-3643543	-2.67043	-6.3662	0.000579909	0.00388831	7.60189	6.0513	10.331	0.884621	0.475676	0.642424
NCLIV_040810	NCLIV_040810	conserved+hypothetical+protein	FR823385:1953868-1954970	-2.64375	-6.24953	0.00946712	0.0421042	4.11169	3.27301	5.58779	0.441223	0.237253	0.320422
NCLIV_023350	NCLIV_023350	conserved+hypothetical+protein	FR823388:3538021-3542113	-2.62903	-6.18612	6.15369e-19	4.88105e-17	60.0559	47.806	81.6159	7.93639	4.26753	5.76351
NCLIV_028530	NCLIV_028530	putative+phospholipid-transporting+P-type+ATPase	FR823389:3645666-3657673	-2.61757	-6.13716	5.04469e-26	5.78664e-24	92.5908	73.7047	125.831	12.3905	6.66258	8.99814
NCLIV_014020	NCLIV_014020	Peroxiredoxin-2E-1,+related	FR823386:1581678-1582481	-2.59925	-6.05971	1.74405e-35	2.82688e-33	133.442	106.223	181.348	18.1334	9.75063	13.1687
NCLIV_062520	NCLIV_062520	3-ketoacyl-(Acyl-carrier-protein)+reductase,+related	FR823393:1803153-1807342	-2.59276	-6.03254	7.09848e-29	9.12522e-27	107.284	85.4005	145.798	14.6244	7.86379	10.6204
NCLIV_025780	NCLIV_025780	conserved+hypothetical+protein	FR823389:1499193-1499668	-2.5601	-5.89747	0.000138711	0.00112661	10.1491	8.07894	13.7926	1.32284	0.711316	0.960668
NCLIV_058960	NCLIV_058960	conserved+hypothetical+protein	FR823392:4965922-4970371	-2.54784	-5.84757	2.95562e-23	2.89962e-21	81.7977	65.1131	111.163	11.482	6.17405	8.33836
NCLIV_031330	NCLIV_031330	conserved+hypothetical+protein	FR823390:1040141-1046965	-2.53189	-5.78329	6.99694e-10	1.85656e-08	31.6973	25.2318	43.0766	4.43614	2.38539	3.22159
NCLIV_024260	NCLIV_024260	conserved+hypothetical+protein	FR823389:357661-361372	-2.49075	-5.62069	2.9205e-05	0.000283532	12.664	10.0809	17.2104	1.76451	0.948809	1.28141
NCLIV_010830	NCLIV_010830	putative+UDP-N-acetyl-D-galactosamine:polypeptide+N-acetylgalactosaminyltransferase+T3	FR823384:1052664-1056088	-2.44124	-5.43108	5.5164e-14	2.43374e-12	46.9036	37.3365	63.742	7.05147	3.7917	5.12087
NCLIV_030570	NCLIV_030570	hypothetical+protein	FR823390:402765-410413	-2.40745	-5.30537	1.54481e-09	3.83936e-08	28.9122	23.0148	39.2916	4.413	2.37294	3.20478
NCLIV_028260	NCLIV_028260	hypothetical+protein	FR823389:3400202-3403035	-2.36032	-5.13485	2.32288e-08	4.63085e-07	25.3688	20.1942	34.4762	3.99153	2.14631	2.8987
NCLIV_065930	NCLIV_065930	conserved+hypothetical+protein	FR823393:4479991-4482660	-2.35483	-5.11533	0.000754701	0.00488459	8.79099	6.99785	11.947	1.32379	0.711827	0.961357
NCLIV_005670	NCLIV_005670	conserved+hypothetical+protein	FR823382:993762-996362	-2.35396	-5.11225	5.20637e-16	3.03271e-14	57.9885	46.1603	78.8063	9.294	4.99754	6.74943
NCLIV_007770	NCLIV_007770	putative+Rhoptry+kinase+family+protein,+truncated+(incomplete+catalytic+triad)	FR823383:709065-710644	-2.24789	-4.74988	6.82815e-107	4.62824e-104	1630.19	1297.67	2215.42	284.125	152.779	206.336
NCLIV_069650	NCLIV_069650	Phenylalanine-4-hydroxylase,+related	CADU01000315:199-3613	-2.23493	-4.7074	0.00879583	0.0395308	5.56696	4.43145	7.5655	0.881808	0.474163	0.640381
NCLIV_052110	NCLIV_052110	conserved+hypothetical+protein	FR823391:6283533-6289281	-2.23019	-4.69195	2.59029e-07	4.10919e-06	23.0324	18.3344	31.3011	3.96824	2.13379	2.88179
NCLIV_053480	NCLIV_053480	Large+protein+with+signal+peptide.+cysteine-rich,threonine-rich,+possible+mucin,+related	FR823392:301285-304600	-2.17814	-4.5257	0.00965543	0.0427499	5.35968	4.26644	7.2838	0.884297	0.475501	0.642188
NCLIV_058660	NCLIV_058660	conserved+hypothetical+protein	FR823392:4763692-4766333	-2.17794	-4.52508	0.000161197	0.00127454	12.5318	9.97562	17.0307	2.1976	1.18169	1.59593
NCLIV_004340	NCLIV_004340	hypothetical+protein	FR823381:1640611-1641401	-2.14465	-4.42184	6.56538e-19	5.09911e-17	83.1035	66.1525	112.938	15.4684	8.31761	11.2333
NCLIV_038170	NCLIV_038170	Hypoxanthine+phosphoribosyltransferase,+related	FR823390:6525320-6527859	-2.13568	-4.39444	4.75343e-13	1.90546e-11	57.0628	45.4235	77.5483	10.6574	5.73064	7.73952
NCLIV_061740	NCLIV_061740	Hydrolase,+alpha/beta+fold+family,+related	FR823393:1194372-1197829	-2.10675	-4.3072	6.09963e-05	0.000547279	14.2479	11.3417	19.3629	2.64484	1.42217	1.92072
NCLIV_016780	NCLIV_016780	conserved+hypothetical+protein	FR823387:1131643-1132841	-2.09328	-4.26716	0.000105801	0.000893374	14.1085	11.2307	19.1735	2.6441	1.42178	1.92018
NCLIV_020280	NCLIV_020280	YDL036Cp-like+protein,+related	FR823388:926328-928696	-2.08581	-4.24512	0.0010628	0.00654896	9.53773	7.59228	12.9618	1.76634	0.949794	1.28274
NCLIV_069870	NCLIV_069870	hypothetical+protein,+conserved	CADU01000321:27416-30836	-2.06955	-4.19755	8.63503e-06	9.68163e-05	18.4026	14.6489	25.0091	3.53654	1.90166	2.56829
NCLIV_047150	NCLIV_047150	conserved+hypothetical+protein	FR823391:1965624-1971680	-2.05686	-4.1608	7.14282e-77	2.95871e-74	1203.85	958.295	1636.03	239.514	128.791	173.938
NCLIV_002110	NCLIV_002110	putative+TPR+domain-containing+protein	FR823380:1948639-1952759	-2.05548	-4.15681	1.15196e-05	0.00012557	20.4853	16.3068	27.8395	3.98669	2.14371	2.89519
NCLIV_045930	NCLIV_045930	putative+glutaredoxin	FR823391:941944-942961	-2.03658	-4.10272	0.000126633	0.0010456	13.6144	10.8374	18.502	2.65449	1.42736	1.92773
NCLIV_053100	NCLIV_053100	conserved+hypothetical+protein	FR823391:6975605-6976771	-2.02245	-4.06272	1.56968e-05	0.000164607	17.8124	14.1791	24.207	3.53772	1.90229	2.56914
NCLIV_0245	NCLIV_0245	NAD+binding+domain+of+6-phosphogluconate+dehydrogenase	FR823389:522992-527804	-2.01418	-4.0395	3.09578e-07	4.78883e-06	26.2494	20.8952	35.6729	5.28871	2.84383	3.84073
NCLIV_032950	NCLIV_032950	putative+deoxyuridine+5'-triphosphate+nucleotidohydrolase	FR823390:2301094-2302409	-2.01352	-4.03765	1.30294e-43	3.34991e-41	331.336	263.752	450.285	67.8646	36.4919	49.2842
NCLIV_066970	NCLIV_066970	putative+enoyl-acyl+carrier+reductase	FR823393:5300639-5303835	-2.0102	-4.02837	4.31471e-27	5.18878e-25	135.834	108.127	184.598	27.8315	14.9655	20.2116
NCLIV_007960	NCLIV_007960	conserved+hypothetical+protein	FR823383:865356-867625	-2.00801	-4.02226	5.36624e-08	9.87918e-07	32.6273	25.9721	44.3404	6.62505	3.5624	4.8112
NCLIV_004260	NCLIV_004260	hypothetical+protein	FR823381:1563847-1566590	-1.97434	-3.92949	2.16658e-10	6.18928e-09	42.2975	33.6699	57.4823	8.82222	4.74386	6.40682
NCLIV_033590	NCLIV_033590	conserved+hypothetical+protein	FR823390:2803377-2808764	-1.96993	-3.9175	0.000254873	0.001889	12.9729	10.3268	17.6302	2.6504	1.42516	1.92475
NCLIV_053980	NCLIV_053980	conserved+hypothetical+protein	FR823392:654181-656372	-1.9699	-3.9174	4.63371e-07	6.90979e-06	29.7245	23.6615	40.3956	6.19181	3.32944	4.49658
NCLIV_032060	NCLIV_032060	putative+peptidase+family+T4	FR823390:1682153-1687018	-1.9332	-3.81902	3.76333e-08	7.19471e-07	32.8588	26.1564	44.655	7.03486	3.78277	5.10881
NCLIV_047210	NCLIV_047210	conserved+hypothetical+protein	FR823391:2015522-2017973	-1.91808	-3.7792	1.50673e-09	3.78254e-08	40.9092	32.5648	55.5956	8.873	4.77116	6.44369
NCLIV_009520	NCLIV_009520	conserved+hypothetical+protein	FR823384:34822-39690	-1.91275	-3.76526	2.65823e-06	3.36499e-05	24.6312	19.607	33.4737	5.32641	2.8641	3.86811
NCLIV_034300	NCLIV_034300	conserved+hypothetical+protein	FR823390:3388161-3390446	-1.85175	-3.60938	1.83349e-05	0.000189342	19.6576	15.648	26.7147	4.42092	2.3772	3.21053
NCLIV_010760	NCLIV_010760	hypothetical+protein	FR823384:977177-999529	-1.83786	-3.5748	1.06756e-16	6.57831e-15	95.8252	76.2793	130.226	22.11	11.8889	16.0565
NCLIV_062940	NCLIV_062940	putative+pyruvate+dehydrogenase	FR823393:2155810-2159180	-1.81951	-3.52961	1.18735e-15	6.60665e-14	88.3605	70.3372	120.082	20.6439	11.1006	14.9919
NCLIV_030730	NCLIV_030730	putative+acetyltransferase+domain-containing+protein	FR823390:529066-530879	-1.80144	-3.48567	3.81868e-10	1.04677e-08	48.8238	38.865	66.3515	11.5114	6.1899	8.35977
NCLIV_012460	NCLIV_012460	Lysyl-tRNA+synthetase,+related	FR823386:178067-192255	-1.80089	-3.48435	2.91686e-13	1.19495e-11	69.3076	55.1707	94.189	16.3842	8.81006	11.8984
NCLIV_000330	NCLIV_000330	conserved+hypothetical+protein	FR823380:282208-286323	-1.7827	-3.4407	3.94764e-07	5.98244e-06	29.7885	23.7124	40.4826	7.08196	3.80809	5.14302
NCLIV_015650	NCLIV_015650	hypothetical+protein	FR823387:173105-177665	-1.76084	-3.38896	6.06873e-06	7.07007e-05	23.8139	18.9565	32.3631	5.73249	3.08246	4.16301
NCLIV_044360	NCLIV_044360	conserved+hypothetical+protein	FR823385:5001985-5003537	-1.75872	-3.38397	1.4741e-06	1.99472e-05	27.47	21.8668	37.3317	6.63531	3.56792	4.81865
NCLIV_037160	NCLIV_037160	putative+actin-like+family+protein	FR823390:5725192-5730976	-1.75382	-3.3725	6.2057e-06	7.17359e-05	23.7603	18.9138	32.2902	5.74751	3.09053	4.17392
NCLIV_055500	NCLIV_055500	conserved+hypothetical+protein	FR823392:1996705-2002451	-1.73679	-3.33292	1.34771e-07	2.248e-06	35.8653	28.5497	48.7409	8.82553	4.74564	6.40922
NCLIV_017800	NCLIV_017800	hypothetical+protein	FR823387:2036358-2036992	-1.73362	-3.3256	0.00422929	0.0214953	9.22357	7.3422	12.5348	2.21051	1.18863	1.6053
NCLIV_037170	NCLIV_037170	conserved+hypothetical+protein	FR823390:5735736-5740427	-1.72666	-3.30961	5.84333e-05	0.000524914	23.2699	18.5234	31.6237	5.73739	3.08509	4.16657
NCLIV_045430	NCLIV_045430	putative+DNA-binding+protein+HU	FR823391:567300-568246	-1.71065	-3.27308	4.93007e-22	4.5381e-20	140.085	111.511	190.375	35.358	19.0126	25.6774
NCLIV_055220	NCLIV_055220	putative+CAMP-dependent+protein+kinase+regulatory+subunit	FR823392:1723569-1726231	-1.70588	-3.26229	0.0115448	0.0494419	7.31021	5.81911	9.93457	1.76997	0.951742	1.28538
NCLIV_066620	NCLIV_066620	conserved+hypothetical+protein	FR823393:5076387-5077091	-1.68636	-3.21845	7.56579e-07	1.09535e-05	33.0208	26.2854	44.8753	8.41131	4.52291	6.10841
NCLIV_000530	NCLIV_000530	3-oxoacyl-(Acyl-carrier-protein)+synthase+II,related	FR823380:417648-423323	-1.68383	-3.2128	1.51144e-19	1.26621e-17	127.553	101.535	173.344	32.7928	17.6333	23.8146
NCLIV_055730	NCLIV_055730	hypothetical+protein	FR823392:2189146-2195639	-1.67943	-3.20302	1.01691e-14	4.9556e-13	103.921	82.7238	141.229	26.7841	14.4023	19.451
NCLIV_055510	NCLIV_055510	conserved+hypothetical+protein	FR823392:2003532-2009580	-1.67897	-3.20198	0.00016389	0.00129309	17.4141	13.862	23.6657	4.41887	2.3761	3.20904
NCLIV_064560	NCLIV_064560	hypothetical+protein	FR823393:3448837-3451610	-1.67511	-3.19344	0.000649741	0.00427957	13.9599	11.1125	18.9716	3.53534	1.90101	2.56741
NCLIV_044150	NCLIV_044150	conserved+hypothetical+protein	FR823385:4707444-4712879	-1.67007	-3.18229	4.15064e-05	0.000385394	22.3491	17.7905	30.3724	5.73133	3.08183	4.16217
NCLIV_065280	NCLIV_065280	Proliferating+cell+nuclear+antigen,+related	FR823393:3983148-3985672	-1.65187	-3.1424	9.35345e-26	1.04089e-23	205.193	163.339	278.857	53.9917	29.0323	39.2095
NCLIV_008230	NCLIV_008230	delta-aminolevulinic+acid+dehydratase,+related	FR823383:1138306-1144066	-1.6423	-3.12162	8.29016e-12	2.90195e-10	72.1919	57.4666	98.1087	19.0676	10.253	13.8471
NCLIV_016930	NCLIV_016930	hypothetical+protein	FR823387:1234886-1236979	-1.63748	-3.11123	0.00056283	0.00378819	15.2907	12.1718	20.7801	3.98611	2.1434	2.89477
NCLIV_024790	NCLIV_024790	conserved+hypothetical+protein	FR823389:737293-738756	-1.63488	-3.10562	0.00104755	0.00647101	13.5861	10.8149	18.4635	3.53884	1.90289	2.56995
NCLIV_051570	NCLIV_051570	conserved+hypothetical+protein	FR823391:5813541-5814713	-1.62942	-3.09388	0.000284588	0.00207824	16.7612	13.3423	22.7785	4.40322	2.36769	3.19768
NCLIV_045700	NCLIV_045700	putative+transmembrane+amino+acid+transporter+domain-containing+protein	FR823391:770777-774621	-1.61754	-3.06851	8.37239e-05	0.000725024	19.9444	15.8762	27.1044	5.29942	2.84959	3.84851
NCLIV_000900	NCLIV_000900	conserved+hypothetical+protein	FR823380:742571-746681	-1.61323	-3.05936	2.46807e-07	3.92365e-06	37.9655	30.2215	51.5951	10.1936	5.48128	7.40274
NCLIV_012560	NCLIV_012560	putative+SNF7+family+domain-containing+protein	FR823386:262989-266395	-1.60996	-3.05243	0.00241734	0.0133509	11.7374	9.34327	15.9511	3.10107	1.6675	2.25204
NCLIV_010140	NCLIV_010140	putative+proliferating+cell+nuclear+antigen	FR823384:444831-446971	-1.60978	-3.05206	6.19774e-11	1.90166e-09	63.6782	50.6895	86.5386	17.1954	9.24625	12.4875
NCLIV_014720	NCLIV_014720	conserved+hypothetical+protein	FR823386:2119773-2126444	-1.60726	-3.04672	4.08852e-10	1.11663e-08	55.7194	44.3541	75.7226	15.062	8.0991	10.9382
NCLIV_0155	NCLIV_0155	alpha/beta+hydrolase+fold+domain+containing+protein	FR823387:135717-141770	-1.58364	-2.99726	3.91264e-11	1.26289e-09	81.0542	64.5212	110.153	22.3135	11.9984	16.2044
NCLIV_036050	NCLIV_036050	conserved+hypothetical+protein	FR823390:4818619-4835188	-1.5775	-2.98453	3.60739e-08	6.93214e-07	43.4567	34.5926	59.0576	11.9757	6.43954	8.69692
NCLIV_053630	NCLIV_053630	putative+zinc+finger+(CCCH+type)+protein	FR823392:402467-405451	-1.56912	-2.96725	1.21405e-18	9.14338e-17	145.441	115.774	197.654	40.5092	21.7825	29.4183
NCLIV_053090	NCLIV_053090	conserved+hypothetical+protein	FR823391:6973521-6974321	-1.56081	-2.95019	0.000211034	0.00161713	19.198	15.2821	26.09	5.307	2.85366	3.85401
NCLIV_015430	NCLIV_015430	hypothetical+protein	FR823387:23802-34655	-1.55623	-2.94085	3.51582e-18	2.49657e-16	132.823	105.731	180.507	37.3207	20.068	27.1028
NCLIV_001900	NCLIV_001900	putative+histidyl-tRNAsynthetase	FR823380:1746926-1750924	-1.54588	-2.91982	2.39247e-39	4.69429e-37	598.896	476.737	813.899	169.782	91.2949	123.298
NCLIV_012540	NCLIV_012540	hypothetical+protein	FR823386:250573-254720	-1.54246	-2.9129	1.138e-05	0.000124413	28.3952	22.6033	38.589	7.99093	4.29686	5.80313
NCLIV_0153	NCLIV_0153	longevity-assurance+(LAG1)+domain-containing+protein	FR823386:2652362-2682246	-1.52869	-2.88524	9.89747e-07	1.37678e-05	35.6645	28.3898	48.468	10.1559	5.46098	7.37533
NCLIV_041450	NCLIV_041450	cDNA+FLJ39191+fis,+clone+OCBBF2004669,+highly+similar+to+Homo+sapiens+ATPase+type+13A4+(ATP13A4),+mRNA,related	FR823385:2458433-2471177	-1.52574	-2.87935	2.79801e-10	7.8555e-09	69.3555	55.2087	94.254	19.867	10.6828	14.4277
NCLIV_052780	NCLIV_052780	putative+penicillin+amidase+domain-containing+protein	FR823391:6719487-6730679	-1.52212	-2.87212	6.74414e-34	1.06988e-31	472.449	376.082	642.058	136.145	73.2072	98.87
NCLIV_058920	NCLIV_058920	hypothetical+protein	FR823392:4927317-4931346	-1.51552	-2.85902	1.05028e-05	0.0001155	30.7011	24.4389	41.7228	8.81249	4.73863	6.39975
NCLIV_048340	NCLIV_048340	putative+pseudouridylate+synthase+1	FR823391:3035676-3045758	-1.51438	-2.85675	8.29593e-08	1.45132e-06	46.1752	36.7567	62.7521	13.3049	7.15427	9.6622
NCLIV_042400	NCLIV_042400	macrophage+migration+inhibitory+factor,+related	FR823385:3249800-3251351	-1.50449	-2.83725	2.97161e-12	1.0808e-10	85.3893	67.9721	116.044	24.8432	13.3586	18.0414
NCLIV_008220	NCLIV_008220	putative+M16+family+peptidase	FR823383:1126755-1134940	-1.50369	-2.83567	4.22936e-07	6.34489e-06	47.1398	37.5245	64.063	13.6865	7.35947	9.93933
NCLIV_003550	NCLIV_003550	hypothetical+protein	FR823381:1023129-1023677	-1.49929	-2.82703	2.55347e-06	3.24892e-05	34.9246	27.8009	47.4626	10.1508	5.45824	7.37162
NCLIV_053050	NCLIV_053050	putative+indole-3-glycerol+phosphate+synthase+domain+containing+protein	FR823391:6948238-6955630	-1.49905	-2.82656	1.30266e-10	3.88506e-09	67.9658	54.1025	92.3654	19.8334	10.6648	14.4033
NCLIV_052060	NCLIV_052060	Cullin-associated+NEDD8-dissociated+protein+1,related	FR823391:6239632-6248574	-1.47226	-2.77456	5.7837e-06	6.74855e-05	31.3228	24.9337	42.5676	9.27016	4.98472	6.73212
NCLIV_062490	NCLIV_062490	unspecified+product	FR823393:1747310-1752424	-1.46982	-2.76987	3.78851e-11	1.22814e-09	79.9959	63.6788	108.714	23.8383	12.8183	17.3117
NCLIV_015080	NCLIV_015080	conserved+hypothetical+protein	FR823386:2426582-2436662	-1.46523	-2.76107	0.000390425	0.00275143	24.3448	19.3791	33.0845	7.22078	3.88274	5.24383
NCLIV_060910	NCLIV_060910	putative+DNA+replication+licensing+factor	FR823393:481836-489804	-1.45611	-2.74367	5.32878e-15	2.70281e-13	129.52	103.101	176.018	39.0148	20.9789	28.3331
NCLIV_065610	NCLIV_065610	Proteophosphoglycan+5,+related	FR823393:4238540-4244240	-1.45537	-2.74226	4.22225e-11	1.35694e-09	84.1035	66.9486	114.297	25.3198	13.6149	18.3876
NCLIV_011590	NCLIV_011590	hypothetical+protein	FR823384:1681528-1686936	-1.45355	-2.73881	3.6099e-06	4.43417e-05	33.8005	26.9061	45.9349	10.142	5.45355	7.36529
NCLIV_065390	NCLIV_065390	Bifunctional+dihydrofolate+reductase-thymidylate+synthase,+related	FR823393:4080315-4086200	-1.44509	-2.7228	5.8307e-19	4.67459e-17	161.632	128.663	219.657	49.0821	26.3923	35.6441
NCLIV_068350	NCLIV_068350	conserved+hypothetical+protein	FR823393:6190583-6196200	-1.44346	-2.71973	0.00197599	0.0112123	14.8065	11.7863	20.122	4.42982	2.38199	3.217
NCLIV_023470	NCLIV_023470	Ribonuclease,+related	FR823388:3639879-3644140	-1.437	-2.70756	1.70853e-06	2.27478e-05	36.3802	28.9596	49.4406	11.0493	5.9414	8.02415
NCLIV_025530	NCLIV_025530	putative+TPR+domain-containing+protein	FR823389:1305733-1309406	-1.43554	-2.70484	3.61953e-22	3.4161e-20	215.726	171.723	293.171	65.9713	35.4739	47.9093
NCLIV_033420	NCLIV_033420	hypothetical+protein	FR823390:2666243-2672232	-1.43351	-2.70104	1.16879e-05	0.000126849	30.5127	24.2889	41.4668	9.27756	4.9887	6.73749
NCLIV_056970	NCLIV_056970	conserved+hypothetical+protein	FR823392:3323756-3333948	-1.43345	-2.70092	1.8288e-07	2.97719e-06	46.5077	37.0214	63.204	14.182	7.62588	10.2991
NCLIV_012730	NCLIV_012730	Os10g0412100+protein,+related	FR823386:441794-451361	-1.42386	-2.68302	0.00573432	0.0274953	11.6747	9.29332	15.8658	3.52612	1.89605	2.56072
NCLIV_0319	NCLIV_0319	3-oxoacyl-(acyl-carrier-protein)+synthase+III+family+protein	FR823390:1509144-1513254	-1.42372	-2.68277	5.25646e-08	9.7493e-07	52.116	41.4857	70.8256	16.0095	8.60859	11.6263
NCLIV_055940	NCLIV_055940	putative+TPR+domain-containing+protein	FR823392:2399122-2404492	-1.42319	-2.68178	1.75978e-08	3.6346e-07	56.121	44.6738	76.2684	17.2529	9.27718	12.5293
NCLIV_023120	NCLIV_023120	Chorismate+synthase,+related	FR823388:3391261-3396376	-1.41844	-2.67296	4.08251e-13	1.6543e-11	107.543	85.6074	146.152	33.2413	17.8744	24.1403
NCLIV_035870	NCLIV_035870	putative+glycerol-3-phosphate+acyltransferase	FR823390:4671099-4674949	-1.41434	-2.66538	6.55213e-08	1.18002e-06	49.9394	39.7531	67.8676	15.4394	8.30205	11.2123
NCLIV_026360	NCLIV_026360	conserved+hypothetical+protein	FR823389:1937361-1941997	-1.40148	-2.64173	1.6516e-07	2.70645e-06	46.6257	37.1152	63.3643	14.54	7.8184	10.5591
NCLIV_015150	NCLIV_015150	conserved+hypothetical+protein	FR823386:2498957-2501766	-1.39674	-2.63305	7.02748e-09	1.56877e-07	67.3716	53.6296	91.558	21.1132	11.353	15.3327
NCLIV_049750	NCLIV_049750	putative+replication+factor+c+subunit	FR823391:4273404-4283789	-1.3951	-2.63007	3.16709e-08	6.14944e-07	69.6728	55.4613	94.6853	21.8602	11.7546	15.8752
NCLIV_025810	NCLIV_025810	conserved+hypothetical+protein	FR823389:1518468-1520583	-1.39462	-2.6292	9.76196e-06	0.000108311	35.4011	28.1802	48.1101	11.074	5.95468	8.04209
NCLIV_008810	NCLIV_008810	conserved+hypothetical+protein	FR823383:1639483-1642556	-1.39061	-2.62189	7.57874e-06	8.60078e-05	36.5869	29.1241	49.7216	11.48	6.17298	8.33692
NCLIV_010790	NCLIV_010790	putative+Aurora+kinase(incomplete+catalytic+triad)	FR823384:1029140-1038798	-1.38888	-2.61875	1.12677e-07	1.91809e-06	54.617	43.4766	74.2245	17.1958	9.24649	12.4878
NCLIV_003470	NCLIV_003470	putative+thrombospondin+type+1+domain-containing+protein	FR823381:971864-978049	-1.388	-2.61715	1.01051e-08	2.17756e-07	60.0877	47.8313	81.6591	18.9376	10.1831	13.7527
NCLIV_025100	NCLIV_025100	hypothetical+protein	FR823389:973254-979037	-1.38543	-2.61249	0.00738028	0.0340516	11.3744	9.05431	15.4578	3.5294	1.89782	2.5631
NCLIV_058270	NCLIV_058270	conserved+hypothetical+protein	FR823392:4452354-4459711	-1.38439	-2.61062	2.30128e-07	3.67417e-06	47.742	38.0038	64.8813	15.0681	8.10236	10.9426
NCLIV_015770	NCLIV_015770	conserved+hypothetical+protein	FR823387:291978-294599	-1.38176	-2.60586	1.27815e-05	0.000136336	32.327	25.7331	43.9324	10.197	5.48309	7.40518
NCLIV_005700	NCLIV_005700	conserved+hypothetical+protein	FR823382:1002804-1007922	-1.37098	-2.58646	5.759e-06	6.73027e-05	37.5299	29.8748	51.0031	11.9407	6.42072	8.6715
NCLIV_059870	NCLIV_059870	conserved+hypothetical+protein	FR823392:5718781-5720298	-1.35953	-2.56601	9.03268e-05	0.000776789	26.2331	20.8822	35.6508	8.3909	4.51193	6.09358
NCLIV_051700	NCLIV_051700	conserved+hypothetical+protein	FR823391:5894997-5897041	-1.35785	-2.56303	2.59264e-08	5.08704e-07	69.7884	55.5533	94.8423	22.4719	12.0835	16.3194
NCLIV_052470	NCLIV_052470	hypothetical+protein	FR823391:6536850-6542415	-1.35487	-2.55774	3.0732e-05	0.000297195	31.4938	25.0699	42.8001	10.1224	5.44298	7.35102
NCLIV_038450	NCLIV_038450	conserved+hypothetical+protein	FR823385:108566-109111	-1.35169	-2.55212	2.82293e-06	3.5434e-05	42.6923	33.9841	58.0188	13.7775	7.40838	10.0054
NCLIV_021700	NCLIV_021700	conserved+hypothetical+protein	FR823388:2136857-2143360	-1.34772	-2.5451	3.92518e-05	0.000366284	34.1225	27.1624	46.3725	11.0275	5.92969	8.00833
NCLIV_063860	NCLIV_063860	putative+thioredoxin	FR823393:2903557-2905433	-1.33503	-2.52281	1.45876e-27	1.78304e-25	570.207	453.9	774.912	187.101	100.608	135.876
NCLIV_032420	NCLIV_032420	conserved+hypothetical+protein	FR823390:1958131-1961010	-1.33153	-2.5167	1.68195e-06	2.24742e-05	44.4579	35.3896	60.4183	14.5548	7.82638	10.5699
NCLIV_045290	NCLIV_045290	cDNA+FLJ30053+fis,+clone+ADRGL1000144,+highly+similar+to+StAR-related+lipid+transfer+protein+7,+related	FR823391:431368-434378	-1.33032	-2.51458	7.81312e-11	2.36807e-09	87.674	69.7908	119.149	28.7995	15.486	20.9146
NCLIV_009830	NCLIV_009830	conserved+hypothetical+protein	FR823384:270293-281374	-1.32523	-2.50573	9.77189e-08	1.67878e-06	55.2764	44.0014	75.1205	18.1939	9.78319	13.2127
NCLIV_034340	NCLIV_034340	hypothetical+protein	FR823390:3414556-3417262	-1.3196	-2.49597	0.00162861	0.00943505	17.5238	13.9494	23.8148	5.74048	3.08676	4.16882
NCLIV_012905	NCLIV_012905	unspecified+product	FR823386:635698-638925	-1.31808	-2.49334	4.97693e-05	0.000455312	36.2883	28.8865	49.3158	11.9789	6.44127	8.69925
NCLIV_032890	NCLIV_032890	T10O22.7,+related	FR823390:2255380-2264469	-1.31664	-2.49085	2.65455e-05	0.000260263	32.0057	25.4773	43.4957	10.5675	5.68231	7.67424
NCLIV_016250	NCLIV_016250	putative+cytidine+deaminase	FR823387:746972-750154	-1.31632	-2.49029	3.10265e-07	4.78952e-06	53.3789	42.491	72.542	17.6768	9.5051	12.8371
NCLIV_010990	NCLIV_010990	conserved+hypothetical+protein	FR823384:1167855-1170423	-1.31459	-2.48731	0.0102574	0.0449083	12.067	9.6056	16.399	3.94477	2.12117	2.86475
NCLIV_006110	NCLIV_006110	conserved+hypothetical+protein	FR823382:1399069-1401092	-1.31455	-2.48724	7.39228e-08	1.30609e-06	57.1086	45.4599	77.6106	18.9409	10.1849	13.7552
NCLIV_004820	NCLIV_004820	phospho-2-dehydro-3-deoxyheptonate+aldolase,related	FR823382:197997-203183	-1.31192	-2.48271	6.44314e-12	2.27678e-10	101.381	80.7022	137.777	33.7429	18.1441	24.5045
NCLIV_0253	NCLIV_0253	GTP-binding+conserved+hypothetical+domain-containing+protein	FR823389:1140659-1143061	-1.31005	-2.4795	9.21307e-05	0.000789571	27.9519	22.2504	37.9866	9.26238	4.98054	6.72647
NCLIV_068850	NCLIV_068850	unspecified+product	CADU01000212:1435-3108	-1.3062	-2.47289	8.94101e-38	1.62596e-35	3484.03	2773.38	4734.8	1166.69	627.348	847.265
NCLIV_063790	NCLIV_063790	hypothetical+protein	FR823393:2842817-2852436	-1.30475	-2.47041	7.44717e-06	8.49023e-05	39.6597	31.5701	53.8975	13.222	7.1097	9.602
NCLIV_018380	NCLIV_018380	putative+dihydrodipicolinate+reductase	FR823387:2494798-2496946	-1.30142	-2.46472	4.04587e-06	4.91302e-05	39.6108	31.5312	53.831	13.2359	7.11717	9.6121
NCLIV_046950	NCLIV_046950	UDP-glucose+4-epimerase,+related	FR823391:1781036-1785006	-1.29826	-2.45932	8.19692e-09	1.80284e-07	72.0257	57.3343	97.8829	24.181	13.0025	17.5606
NCLIV_046530	NCLIV_046530	putative+reticulon+domain-containing+protein	FR823391:1466361-1466954	-1.28962	-2.44463	5.73178e-16	3.2874e-14	165.384	131.65	224.757	55.9521	30.0864	40.6331
NCLIV_033270	NCLIV_033270	hypothetical+protein	FR823390:2533234-2539079	-1.28871	-2.44309	9.26151e-09	2.01912e-07	78.9588	62.8532	107.305	26.6926	14.353	19.3845
NCLIV_064730	NCLIV_064730	hypothetical+protein	FR823393:3568663-3571629	-1.28727	-2.44066	0.00155747	0.00910072	18.3744	14.6265	24.9708	6.16211	3.31347	4.47501
NCLIV_018180	NCLIV_018180	putative+Ras+family+domain-containing+protein	FR823387:2347171-2350450	-1.27961	-2.42774	5.66153e-06	6.63717e-05	39.0103	31.0532	53.015	13.2346	7.11647	9.61115
NCLIV_009420	NCLIV_009420	putative+pyruvate+kinase	FR823383:2036595-2038850	-1.27801	-2.42505	0.00207995	0.0117575	18.3127	14.5774	24.887	6.18104	3.32365	4.48875
NCLIV_044550	NCLIV_044550	conserved+hypothetical+protein	FR823385:5179432-5186196	-1.2735	-2.41747	0.00086755	0.00552387	23.1727	18.4461	31.4917	7.86653	4.22997	5.71278
NCLIV_029610	NCLIV_029610	putative+prefoldin+subunit+3	FR823389:4559843-4563257	-1.27185	-2.41471	9.47699e-06	0.00010547	42.8044	34.0734	58.1712	14.6076	7.85474	10.6082
NCLIV_057630	NCLIV_057630	putative+dolichyl+pyrophosphate+Glc1Man9GlcNAc2+alpha-1,3-glucosyltransferase	FR823392:3932846-3941612	-1.27137	-2.41391	7.04445e-08	1.25056e-06	63.3771	50.4498	86.1294	21.6705	11.6526	15.7374
NCLIV_068360	NCLIV_068360	putative+toprim+domain-containing+protein	FR823393:6200650-6208912	-1.26278	-2.39958	9.87388e-07	1.37678e-05	47.569	37.8661	64.6462	16.345	8.78897	11.8699
NCLIV_014740	NCLIV_014740	unspecified+product	FR823386:2141652-2142965	-1.25873	-2.39285	0.00370259	0.0191049	15.5355	12.3666	21.1127	5.30473	2.85244	3.85236
NCLIV_011620	NCLIV_011620	conserved+hypothetical+protein	FR823384:1716371-1718740	-1.25734	-2.39054	0.00327355	0.0173226	16.8278	13.3954	22.869	5.7575	3.09591	4.18118
NCLIV_005790	NCLIV_005790	conserved+hypothetical+protein	FR823382:1090801-1094922	-1.25575	-2.38791	0.000372747	0.00264434	25.6035	20.3811	34.7952	8.80789	4.73616	6.39641
NCLIV_056840	NCLIV_056840	putative+regulator+of+chromosome+condensation+domain-containing+protein	FR823392:3193438-3198695	-1.24274	-2.36647	0.000112759	0.000942523	30.4063	24.2042	41.3221	10.5696	5.68345	7.67579
NCLIV_010800	NCLIV_010800	conserved+hypothetical+protein	FR823384:1041457-1044861	-1.24134	-2.36417	0.000138381	0.00112515	29.2854	23.3119	39.7988	10.1869	5.47769	7.39789
NCLIV_034920	NCLIV_034920	hypothetical+protein	FR823390:3851272-3853354	-1.23085	-2.34705	5.45895e-05	0.000493956	35.2849	28.0877	47.9522	12.3789	6.65633	8.98971
NCLIV_006700	NCLIV_006700	structural+maintenance+of+chromosome+2,+related	FR823382:1944249-1948288	-1.23034	-2.34623	0.000149023	0.00119861	29.0648	23.1363	39.499	10.1876	5.47803	7.39836
NCLIV_012270	NCLIV_012270	putative+calmodulin	FR823386:43492-45545	-1.22402	-2.33596	0.000141467	0.0011465	31.3891	24.9866	42.6578	11.0573	5.94567	8.02993
NCLIV_063770	NCLIV_063770	hypothetical+protein	FR823393:2826213-2832598	-1.2152	-2.32172	2.12968e-10	6.10725e-09	97.7037	77.7747	132.779	34.78	18.7018	25.2577
NCLIV_062840	NCLIV_062840	putative+origin+recognition+complex+subunit+2	FR823393:2086493-2093251	-1.21488	-2.32122	0.000245311	0.0018327	28.6598	22.8139	38.9486	10.1549	5.46047	7.37463
NCLIV_006510	NCLIV_006510	putative+TCP-1/cpn60+family+chaperonin	FR823382:1783314-1789982	-1.21204	-2.31665	3.27385e-14	1.49753e-12	158.343	126.045	215.189	56.5326	30.3985	41.0547
NCLIV_042120	NCLIV_042120	conserved+hypothetical+protein	FR823385:2982413-2984175	-1.20977	-2.31301	2.3914e-05	0.000238372	40.598	32.317	55.1726	14.466	7.77863	10.5054
NCLIV_027700	NCLIV_027700	SRS+domain-containing+protein	FR823389:3025882-3026775	-1.20957	-2.31269	5.09963e-12	1.81927e-10	114.964	91.5142	156.236	41.0969	22.0985	29.8451
NCLIV_020320	NCLIV_020320	Proteophosphoglycan+ppg4,+related	FR823388:944862-947243	-1.20845	-2.31089	0.00144217	0.00854753	21.2143	16.8871	28.8302	7.53201	4.05009	5.46985
NCLIV_024480	NCLIV_024480	conserved+hypothetical+protein	FR823389:511253-514786	-1.20809	-2.31031	0.000248729	0.00185452	29.7055	23.6463	40.3697	10.5786	5.68829	7.68231
NCLIV_018960	NCLIV_018960	conserved+hypothetical+protein	FR823387:2959572-2961335	-1.20805	-2.31024	0.00367352	0.0190075	17.3591	13.8183	23.5911	6.15301	3.30858	4.4684
NCLIV_005130	NCLIV_005130	conserved+hypothetical+protein	FR823382:466685-470907	-1.20734	-2.30912	0.00138737	0.00823588	22.5139	17.9217	30.5964	8.00361	4.30368	5.81233
NCLIV_015810	NCLIV_015810	putative+retinitis+pigmentosa+GTPase+regulator	FR823387:340868-345439	-1.20451	-2.30459	0.0102384	0.0448518	13.718	10.9199	18.6428	4.85986	2.61323	3.52929
NCLIV_023770	NCLIV_023770	hypothetical+protein	FR823388:3876547-3884334	-1.20035	-2.29795	0.000137971	0.00112323	34.7761	27.6827	47.2608	12.4617	6.70088	9.04987
NCLIV_063160	NCLIV_063160	conserved+hypothetical+protein	FR823393:2342041-2345311	-1.19645	-2.29175	8.73308e-13	3.39134e-11	146.477	116.6	199.062	52.8606	28.424	38.3881
NCLIV_018460	NCLIV_018460	conserved+hypothetical+protein	FR823387:2547038-2549608	-1.19506	-2.28955	4.10538e-05	0.000381667	38.3057	30.4923	52.0574	13.7853	7.41262	10.0111
NCLIV_050400	NCLIV_050400	hypothetical+protein	FR823391:4859189-4868169	-1.19292	-2.28615	7.23048e-09	1.59565e-07	98.5839	78.4754	133.976	35.6416	19.1651	25.8834
NCLIV_023990	NCLIV_023990	Acyl+carrier+protein,+related	FR823389:182229-183714	-1.19248	-2.28546	1.18335e-14	5.72925e-13	202.182	160.942	274.765	73.1917	39.3564	53.1528
NCLIV_005950	NCLIV_005950	putative+trafficking+protein+particle+complex+protein	FR823382:1271436-1271858	-1.19078	-2.28276	3.22817e-05	0.000310571	36.7835	29.2806	49.9888	13.2748	7.13808	9.64034
NCLIV_006330	NCLIV_006330	hypothetical+protein	FR823382:1597325-1603077	-1.1835	-2.27127	0.000101253	0.000861805	35.5753	28.3189	48.3468	12.9012	6.93718	9.36901
NCLIV_032430	NCLIV_032430	conserved+hypothetical+protein	FR823390:1966407-1970679	-1.1808	-2.26703	1.11895e-19	9.48052e-18	407.602	324.462	553.931	148.826	80.0265	108.08
NCLIV_051000	NCLIV_051000	Ethylene-inducible+protein+hever,+related	FR823391:5321908-5324807	-1.17923	-2.26456	0.0107137	0.0464966	14.5176	11.5563	19.7294	5.24118	2.81827	3.80622
NCLIV_060300	NCLIV_060300	cDNA,+FLJ96396,+highly+similar+to+Homo+sapiens+ERO1-like+beta+(S.+cerevisiae)+(ERO1LB),+mRNA,+related	FR823393:25832-30575	-1.17651	-2.2603	5.57169e-13	2.19802e-11	140.736	112.029	191.26	51.4952	27.6899	37.3965
NCLIV_056010	NCLIV_056010	conserved+hypothetical+protein	FR823392:2461608-2464241	-1.17117	-2.25195	0.00637892	0.0301593	15.8476	12.6151	21.5369	5.7589	3.09666	4.18219
NCLIV_029560	NCLIV_029560	conserved+hypothetical+protein	FR823389:4514169-4515533	-1.17116	-2.25193	0.000231085	0.00174921	34.0026	27.0669	46.2095	12.4349	6.68645	9.03038
NCLIV_057480	NCLIV_057480	hypothetical+protein	FR823392:3770501-3772308	-1.16883	-2.2483	0.000199741	0.00154009	30.0879	23.9507	40.8894	11.0144	5.9226	7.99877
NCLIV_037190	NCLIV_037190	putative+glyceraldehyde-3-phosphate+dehydrogenase	FR823390:5752362-5755956	-1.16875	-2.24817	2.05484e-19	1.68361e-17	340.874	271.344	463.247	125.496	67.4813	91.1369
NCLIV_025050	NCLIV_025050	SPRY+domain-containing+protein,+related	FR823389:918009-922838	-1.1667	-2.24498	0.0020078	0.0113841	21.7594	17.321	29.571	7.95854	4.27944	5.7796
NCLIV_042850	NCLIV_042850	pyridoxal+phosphate-dependent+acyltransferase,+related	FR823385:3645997-3647977	-1.16389	-2.24061	4.21941e-09	9.65029e-08	89.6608	71.3723	121.849	33.0708	17.7827	24.0165
NCLIV_053010	NCLIV_053010	conserved+hypothetical+protein	FR823391:6914871-6922206	-1.1583	-2.23195	2.33536e-08	4.64332e-07	91.7708	73.0519	124.716	33.9822	18.2728	24.6783
NCLIV_015405	NCLIV_015405	putative+cyclophilin	FR823387:7230-11127	-1.15801	-2.2315	1.93534e-07	3.13693e-06	71.9552	57.2782	97.7871	26.6346	14.3219	19.3424
NCLIV_007290	NCLIV_007290	putative+protein+kinase	FR823383:302837-308795	-1.15726	-2.23033	4.90449e-11	1.54949e-09	121.616	96.8091	165.276	45.0889	24.245	32.7441
NCLIV_007340	NCLIV_007340	conserved+hypothetical+protein	FR823383:358370-360705	-1.15633	-2.2289	0.000327434	0.00235424	34.7966	27.699	47.2886	12.8604	6.91523	9.33936
NCLIV_028690	NCLIV_028690	Multisite-specific+tRNA+m(5)C+methyltransferase,+related	FR823389:3777542-3786352	-1.15177	-2.22187	0.00212381	0.011942	22.9006	18.2294	31.1218	8.46627	4.55246	6.14832
NCLIV_017360	NCLIV_017360	hypothetical+protein	FR823387:1600974-1616641	-1.14825	-2.21644	0.000607538	0.00404447	28.7509	22.8864	39.0724	10.6732	5.73917	7.75104
NCLIV_054680	NCLIV_054680	conserved+hypothetical+protein	FR823392:1272594-1278856	-1.14544	-2.21213	4.55679e-05	0.000418933	41.2644	32.8476	56.0784	15.3812	8.27073	11.17
NCLIV_023230	NCLIV_023230	conserved+hypothetical+protein	FR823388:3469946-3471515	-1.14397	-2.20988	2.00138e-14	9.32645e-13	176.312	140.349	239.608	66.0042	35.4916	47.9332
NCLIV_005330	NCLIV_005330	at4g25910+protein,+related	FR823382:707310-711364	-1.14305	-2.20847	4.46042e-05	0.000410579	39.1075	31.1306	53.147	14.5971	7.84909	10.6006
NCLIV_026390	NCLIV_026390	putative+centrin	FR823389:1962761-1965500	-1.14262	-2.20782	6.45268e-05	0.000575493	42.0069	33.4386	57.0874	15.6906	8.43711	11.3947
NCLIV_035250	NCLIV_035250	GK18150,+related	FR823390:4126499-4134937	-1.14177	-2.20652	6.4792e-07	9.49094e-06	61.5146	48.9672	83.5984	23.0196	12.3781	16.7172
NCLIV_035450	NCLIV_035450	hypothetical+protein	FR823390:4275982-4286176	-1.14161	-2.20627	3.67587e-05	0.000345615	39.0639	31.0958	53.0878	14.5954	7.84817	10.5993
NCLIV_010530	NCLIV_010530	conserved+hypothetical+protein	FR823384:767619-768449	-1.12963	-2.18803	4.2038e-06	5.07998e-05	51.6666	41.1279	70.2149	19.4878	10.4789	14.1523
NCLIV_046780	NCLIV_046780	conserved+hypothetical+protein	FR823391:1661159-1663720	-1.12648	-2.18326	2.13357e-07	3.42105e-06	74.4808	59.2886	101.219	28.185	15.1556	20.4684
NCLIV_010420	NCLIV_010420	conserved+hypothetical+protein	FR823384:706232-711664	-1.12553	-2.18181	0.00246628	0.0135909	21.2285	16.8984	28.8495	7.99012	4.29642	5.80253
NCLIV_031540	NCLIV_031540	putative+chromosome+condensation+protein	FR823390:1190633-1204096	-1.12208	-2.1766	2.20731e-10	6.28156e-09	114.422	91.0832	155.5	43.4675	23.3732	31.5667
NCLIV_015100	NCLIV_015100	conserved+hypothetical+protein	FR823386:2442996-2454715	-1.11802	-2.17049	1.1317e-05	0.000124015	48.9518	38.9669	66.5255	18.6103	10.0071	13.515
NCLIV_009390	NCLIV_009390	putative+Cleft+lip+and+palate+transmembrane+protein+1	FR823383:2002556-2010391	-1.11745	-2.16962	2.87806e-10	8.03702e-09	111.297	88.5952	151.252	42.4152	22.8074	30.8025
NCLIV_002980	NCLIV_002980	putative+5-formyltetrahydrofolate+cyclo-ligase+domain-containing+protein	FR823381:559963-561076	-1.11719	-2.16924	0.00438724	0.0221321	19.8277	15.7834	26.9459	7.5035	4.03476	5.44914
NCLIV_039650	NCLIV_039650	genome+sequencing+data,+contig+C317,+related	FR823385:970505-973066	-1.11693	-2.16885	0.00353871	0.0184508	19.8562	15.806	26.9846	7.51488	4.04088	5.45741
NCLIV_037850	NCLIV_037850	conserved+hypothetical+protein	FR823390:6260717-6262264	-1.11485	-2.16573	0.00482631	0.0238627	21.079	16.7794	28.6464	7.99412	4.29858	5.80544
NCLIV_039850	NCLIV_039850	hypothetical+protein	FR823385:1118193-1122740	-1.11062	-2.15938	4.15595e-09	9.53438e-08	93.7572	74.6331	127.416	35.8901	19.2987	26.0638
NCLIV_057620	NCLIV_057620	conserved+hypothetical+protein	FR823392:3928594-3931162	-1.10882	-2.1567	4.15603e-05	0.000385415	40.5232	32.2575	55.071	15.4938	8.33128	11.2518
NCLIV_019620	NCLIV_019620	conserved+hypothetical+protein	FR823388:295472-297121	-1.10697	-2.15392	0.00963117	0.0426856	17.4487	13.8896	23.7128	6.64309	3.5721	4.8243
NCLIV_054410	NCLIV_054410	Calr+protein,+related	FR823392:1050025-1054717	-1.10146	-2.14572	1.92184e-05	0.000197101	50.0185	39.816	67.9751	19.2397	10.3455	13.9721
NCLIV_044720	NCLIV_044720	conserved+hypothetical+protein	FR823385:5373891-5375204	-1.101	-2.14503	0.00146279	0.00864227	24.1696	19.2397	32.8465	9.26568	4.98231	6.72886
NCLIV_048150	NCLIV_048150	conserved+hypothetical+protein	FR823391:2808764-2811844	-1.1009	-2.14489	1.93641e-05	0.00019805	47.0476	37.4511	63.9376	18.0991	9.73219	13.1438
NCLIV_032510	NCLIV_032510	FAD+binding+domain+containing+protein,+related	FR823390:2012952-2019120	-1.09998	-2.14352	3.60494e-05	0.000341097	45.7825	36.4441	62.2184	17.6227	9.47604	12.7979
NCLIV_059570	NCLIV_059570	conserved+hypothetical+protein	FR823392:5475522-5478217	-1.0993	-2.14251	0.00761351	0.0349978	17.271	13.7482	23.4713	6.60972	3.55416	4.80007
NCLIV_056530	NCLIV_056530	conserved+hypothetical+protein	FR823392:2897777-2906990	-1.08722	-2.12465	0.00114718	0.00699374	28.3873	22.597	38.5784	10.9996	5.91467	7.98806
NCLIV_025060	NCLIV_025060	conserved+hypothetical+protein	FR823389:927164-948580	-1.08646	-2.12353	0.00214704	0.0120364	23.9863	19.0937	32.5974	9.28918	4.99495	6.74593
NCLIV_038630	NCLIV_038630	conserved+hypothetical+protein	FR823385:289712-294844	-1.08345	-2.1191	3.11218e-07	4.79431e-06	75.8655	60.3909	103.101	29.5829	15.9072	21.4835
NCLIV_058040	NCLIV_058040	conserved+hypothetical+protein	FR823392:4301164-4303642	-1.0816	-2.11639	8.07609e-06	9.12353e-05	53.2827	42.4144	72.4112	20.7843	11.1761	15.0938
NCLIV_048560	NCLIV_048560	conserved+hypothetical+protein	FR823391:3229060-3233472	-1.06805	-2.0966	4.63376e-06	5.54564e-05	58.2728	46.3866	79.1927	22.9528	12.3421	16.6686
NCLIV_003190	NCLIV_003190	putative+mitochondrial+carrier+domain-containing+protein	FR823381:729704-734438	-1.06729	-2.09549	9.47597e-10	2.45322e-08	110.807	88.2055	150.587	43.7266	23.5125	31.7549
NCLIV_029370	NCLIV_029370	conserved+hypothetical+protein	FR823389:4408474-4414655	-1.06634	-2.09411	0.00133936	0.00800184	26.9042	21.4164	36.5628	10.5753	5.68651	7.67992
NCLIV_044100	NCLIV_044100	conserved+hypothetical+protein	FR823385:4669945-4672041	-1.06537	-2.09271	1.30199e-05	0.000138285	58.5398	46.5992	79.5556	23.1004	12.4215	16.7758
NCLIV_001000	NCLIV_001000	conserved+hypothetical+protein	FR823380:837604-843136	-1.06198	-2.0878	0.00101465	0.00630436	28.0449	22.3245	38.113	11.0594	5.94685	8.03152
NCLIV_061460	NCLIV_061460	Family+T1,+proteasome+beta+subunit,+threonine+peptidase,+related	FR823393:948450-952944	-1.06118	-2.08664	3.71943e-12	1.33971e-10	174.293	138.742	236.864	69.1085	37.1608	50.1875
NCLIV_050450	NCLIV_050450	conserved+hypothetical+protein	FR823391:4893004-4896680	-1.06074	-2.086	0.000156567	0.00124719	41.7848	33.2618	56.7855	16.5227	8.88455	11.999
NCLIV_065150	NCLIV_065150	putative+sybindin-like+family+domain-containing+protein	FR823393:3885247-3889464	-1.0601	-2.08508	2.26089e-09	5.42032e-08	114.905	91.4671	156.155	45.5731	24.5054	33.0958
NCLIV_061380	NCLIV_061380	hypothetical+protein	FR823393:874323-876302	-1.0572	-2.08089	1.60041e-05	0.000167359	59.2115	47.1339	80.4684	23.4997	12.6362	17.0658
NCLIV_015250	NCLIV_015250	hypothetical+protein	FR823386:2595005-2605610	-1.05681	-2.08033	0.000149279	0.00119938	36.8032	29.2963	50.0156	14.5865	7.84342	10.5929
NCLIV_053850	NCLIV_053850	conserved+hypothetical+protein	FR823392:576430-579384	-1.05417	-2.07652	2.41743e-05	0.000240646	50.9982	40.5959	69.3065	20.2749	10.9022	14.7239
NCLIV_018660	NCLIV_018660	conserved+hypothetical+protein	FR823387:2694328-2700746	-1.05044	-2.07116	0.000937667	0.00590477	29.9759	23.8616	40.7372	11.9217	6.41049	8.65768
NCLIV_005800	NCLIV_005800	unspecified+product	FR823382:1099690-1108304	-1.04996	-2.07048	0.000483005	0.00333981	31.0749	24.7364	42.2307	12.3654	6.64909	8.97993
NCLIV_031690	NCLIV_031690	Oligosaccharyl+transferase-like+protein,+related	FR823390:1313395-1319867	-1.04518	-2.06362	5.71343e-10	1.53788e-08	128.89	102.6	175.161	51.6604	27.7787	37.5165
NCLIV_016000	NCLIV_016000	conserved+hypothetical+protein	FR823387:505969-512793	-1.0441	-2.06208	0.000125329	0.00103598	40.9361	32.5862	55.6322	16.376	8.80566	11.8925
NCLIV_010380	NCLIV_010380	DNA+polymerase,+related	FR823384:666536-687927	-1.04114	-2.05785	4.64109e-09	1.055e-07	118.103	94.013	160.502	47.4652	25.5228	34.4698
NCLIV_005740	NCLIV_005740	conserved+hypothetical+protein	FR823382:1039632-1045837	-1.04061	-2.05709	4.32791e-08	8.16934e-07	91.3104	72.6855	124.091	36.6963	19.7322	26.6493
NCLIV_063710	NCLIV_063710	conserved+hypothetical+protein	FR823393:2751914-2758160	-1.03616	-2.05076	2.01347e-07	3.24944e-06	85.1822	67.8072	115.763	34.3358	18.4629	24.9351
NCLIV_057270	NCLIV_057270	hypothetical+protein	FR823392:3609462-3610428	-1.0354	-2.04969	2.50213e-05	0.000247754	58.0299	46.1933	78.8626	23.3811	12.5724	16.9797
NCLIV_046425	NCLIV_046425	unspecified+product	FR823391:1367098-1368380	-1.03371	-2.04729	4.64886e-06	5.54717e-05	66.5606	52.9839	90.4558	26.861	14.4436	19.5068
NCLIV_040320	NCLIV_040320	putative+ubiquitin-activating+enzyme	FR823385:1467792-1473961	-1.03148	-2.04412	0.000157575	0.00125254	40.4201	32.1755	54.9309	16.3125	8.77151	11.8464
NCLIV_006990	NCLIV_006990	conserved+hypothetical+protein	FR823383:102665-110447	-1.02564	-2.03586	3.87299e-05	0.000362776	53.2131	42.359	72.3165	21.5828	11.6054	15.6737
NCLIV_013120	NCLIV_013120	putative+activator+1+36+kDa	FR823386:826073-834785	-1.02541	-2.03554	7.82235e-05	0.000684547	44.8037	35.6649	60.8882	18.1649	9.76759	13.1916
NCLIV_024420	NCLIV_024420	hypothetical+protein	FR823389:465741-467478	-1.02392	-2.03343	2.93389e-15	1.55142e-13	310.905	247.488	422.52	126.556	68.0515	91.907
NCLIV_014390	NCLIV_014390	hypothetical+protein	FR823386:1851424-1855508	-1.02283	-2.0319	3.47974e-06	4.29333e-05	81.7935	65.1097	111.157	33.2735	17.8917	24.1637
NCLIV_056670	NCLIV_056670	conserved+hypothetical+protein	FR823392:3052229-3054008	-1.02008	-2.02803	7.06052e-18	4.78575e-16	423.296	336.954	575.259	172.789	92.9116	125.482
NCLIV_068490	NCLIV_068490	conserved+hypothetical+protein	FR823393:6306538-6308777	-1.01984	-2.02769	0.00947006	0.0421042	17.4402	13.8828	23.7012	7.06039	3.79649	5.12735
NCLIV_011080	NCLIV_011080	unspecified+product	FR823384:1247589-1255010	-1.01818	-2.02536	6.30728e-08	1.14143e-06	94.7168	75.397	128.72	38.6663	20.7916	28.08
NCLIV_059560	NCLIV_059560	putative+DNA+replication+licensing+factor	FR823392:5461603-5469910	-1.01655	-2.02307	1.05924e-10	3.18456e-09	153.921	122.525	209.179	62.9438	33.846	45.7107
NCLIV_045950	NCLIV_045950	conserved+hypothetical+protein	FR823391:954082-958113	-1.01252	-2.01743	0.000458712	0.00319641	40.1429	31.9548	54.5541	16.4159	8.82709	11.9214
NCLIV_013900	NCLIV_013900	conserved+hypothetical+protein	FR823386:1513974-1515353	-1.00938	-2.01304	0.0030473	0.016229	23.7389	18.8968	32.2612	9.70386	5.21793	7.04707
NCLIV_053750	NCLIV_053750	Smc+ABC+ATpase,+related	FR823392:493723-506278	-1.00913	-2.0127	2.35268e-05	0.000235142	51.6321	41.1005	70.168	21.1824	11.3901	15.3829
NCLIV_054430	NCLIV_054430	conserved+hypothetical+protein	FR823392:1067907-1077620	-1.00752	-2.01046	2.45479e-05	0.000244039	53.8572	42.8717	73.1918	22.1227	11.8957	16.0658
NCLIV_033980	NCLIV_033980	conserved+hypothetical+protein	FR823390:3119525-3122036	-1.00574	-2.00797	7.91083e-05	0.000689861	48.1853	38.3567	65.4838	19.8113	10.6529	14.3872
NCLIV_062650	NCLIV_062650	putative+DNA+polymerase+alpha+catalytic+subunit	FR823393:1918070-1927408	-1.00464	-2.00645	1.49314e-07	2.46849e-06	100.151	79.7232	136.106	41.2742	22.1938	29.9739
NCLIV_048050	NCLIV_048050	conserved+hypothetical+protein	FR823391:2728890-2731256	-1.00335	-2.00465	9.207e-05	0.000789571	48.7221	38.7841	66.2133	20.0648	10.7892	14.5714
NCLIV_048880	NCLIV_048880	Proteasome+subunit+beta+type-7,+related	FR823391:3508524-3509252	-1.00269	-2.00374	5.54405e-12	1.9684e-10	182.374	145.174	247.846	75.3126	40.4969	54.693
NCLIV_009750	NCLIV_009750	conserved+hypothetical+protein	FR823384:212548-214677	-1.00082	-2.00114	0.01117	0.0480576	19.3963	15.4399	26.3595	7.96501	4.28292	5.7843
NCLIV_013400	NCLIV_013400	conserved+hypothetical+protein	FR823386:1095773-1102141	1.00023	2.00032	1.67604e-23	1.68873e-21	522.378	415.826	709.911	865.468	465.377	628.514
NCLIV_068890	NCLIV_068890	unspecified+product	CADU01000228:949-2610	1.00347	2.00482	6.62824e-17	4.18815e-15	228.976	182.27	311.178	380.285	204.486	276.168
NCLIV_001070	NCLIV_001070	histone+H2B,+related	FR823380:909754-910104	1.00426	2.00591	9.52804e-09	2.06515e-07	58.7048	46.7305	79.7798	97.6434	52.5045	70.91
NCLIV_040930	NCLIV_040930	putative+NEK+kinase	FR823385:2040282-2054791	1.00483	2.00671	6.14484e-17	3.91589e-15	266.324	212.001	361.934	442.711	238.053	321.503
NCLIV_068872	NCLIV_068872	SRS+domain-containing+protein	CADU01000224:1770-2828	1.01464	2.0204	1.63969e-08	3.41496e-07	49.9731	39.7799	67.9134	83.7387	45.0277	60.8122
NCLIV_049520	NCLIV_049520	conserved+hypothetical+protein	FR823391:4078382-4079452	1.01677	2.02338	3.50357e-29	4.58291e-27	2616.01	2082.41	3555.16	4383.64	2357.16	3183.46
NCLIV_000440	NCLIV_000440	molybdopterin+biosynthesis+protein,+related	FR823380:338990-342736	1.02838	2.03973	7.80867e-08	1.37315e-06	47.5409	37.8438	64.608	80.4339	43.2507	58.4122
NCLIV_017420	NCLIV_017420	unspecified+product	FR823387:1647494-1649155	1.031	2.04344	4.03385e-07	6.10069e-06	38.8758	30.9461	52.8321	65.9153	35.4438	47.8686
NCLIV_020800	NCLIV_020800	cyclic+nucleotide-binding+domain+containing+protein	FR823388:1299885-1310654	1.03581	2.05027	6.824e-06	7.81563e-05	27.4508	21.8515	37.3056	46.738	25.1318	33.9418
NCLIV_034710	NCLIV_034710	conserved+hypothetical+protein	FR823390:3678615-3694072	1.04509	2.0635	0.00244383	0.0134772	10.7453	8.55356	14.6029	18.4933	9.94419	13.4301
NCLIV_056890	NCLIV_056890	hypothetical+protein	FR823392:3237512-3238368	1.04833	2.06814	4.77082e-38	8.89282e-36	4840.06	3852.81	6577.63	8289.76	4457.55	6020.14
NCLIV_020210	NCLIV_020210	conserved+hypothetical+protein	FR823388:890182-890928	1.04845	2.06831	8.42995e-06	9.50888e-05	24.4188	19.438	33.1852	41.9579	22.5615	30.4704
NCLIV_015630	NCLIV_015630	conserved+hypothetical+protein	FR823387:167109-168266	1.05607	2.07926	4.41752e-05	0.000407636	21.1497	16.8357	28.7424	36.5508	19.654	26.5437
NCLIV_030330	NCLIV_030330	putative+cAMP-specific+phosphodiesterase	FR823390:206196-218197	1.05992	2.08481	0.00281406	0.0152483	10.1561	8.08449	13.8021	17.6689	9.50088	12.8314
NCLIV_064920	NCLIV_064920	conserved+hypothetical+protein	FR823393:3729434-3731560	1.09435	2.13517	0.00597862	0.0284108	7.92026	6.30473	10.7636	14.1448	7.60588	10.2721
NCLIV_004580	NCLIV_004580	hypothetical+protein	FR823381:1815591-1830526	1.09572	2.1372	6.99733e-16	3.95243e-14	114.301	90.9865	155.335	202.444	108.858	147.017
NCLIV_069030	NCLIV_069030	hypothetical+protein	CADU01000282:10791-13154	1.10057	2.14439	2.08597e-06	2.71432e-05	31.3311	24.9404	42.579	55.7782	29.9929	40.5069
NCLIV_007660	NCLIV_007660	hypothetical+protein	FR823383:612337-619732	1.10503	2.15104	0.00289801	0.0155698	8.86483	7.05663	12.0473	15.9331	8.5675	11.5708
NCLIV_065220	NCLIV_065220	putative+ABC+transporter	FR823393:3936864-3944929	1.1128	2.16265	7.7558e-08	1.36707e-06	33.6481	26.7847	45.7277	60.4065	32.4816	43.868
NCLIV_012440	NCLIV_012440	conserved+hypothetical+protein	FR823386:165459-168266	1.11301	2.16296	8.65551e-13	3.37882e-11	68.4881	54.5183	93.0752	122.823	66.0443	89.1961
NCLIV_032400	NCLIV_032400	hypothetical+protein	FR823390:1953932-1954431	1.11989	2.1733	2.10949e-07	3.39706e-06	30.5208	24.2954	41.4778	55.0764	29.6155	39.9972
NCLIV_045640	NCLIV_045640	conserved+hypothetical+protein	FR823391:726993-727601	1.12132	2.17546	5.28034e-14	2.34808e-12	87.4896	69.644	118.898	157.763	84.8317	114.569
NCLIV_003900	NCLIV_003900	putative+oocyst+wall+protein+COWP	FR823381:1299256-1300758	1.1229	2.17784	2.04631e-05	0.000208433	19.3023	15.3651	26.2318	34.9577	18.7974	25.3868
NCLIV_036660	NCLIV_036660	conserved+hypothetical+protein	FR823390:5283507-5297278	1.13271	2.19271	5.40514e-06	6.3767e-05	20.594	16.3933	27.9872	37.5432	20.1876	27.2644
NCLIV_011000	NCLIV_011000	fibrillin+1,+related	FR823384:1171610-1174177	1.1347	2.19572	0.0034398	0.0180233	7.92717	6.31023	10.773	14.5624	7.83045	10.5754
NCLIV_001950	NCLIV_001950	unspecified+product	FR823380:1793066-1794763	1.14972	2.21871	2.45788e-08	4.86099e-07	41.4366	32.9846	56.3124	76.2828	41.0186	55.3976
NCLIV_053410	NCLIV_053410	putative+peroxisome+biogenesis+factor+1	FR823392:239924-246980	1.15418	2.22558	0.000236056	0.00177423	13.4879	10.7367	18.3301	25.0091	13.4478	18.162
NCLIV_000210	NCLIV_000210	hypothetical+protein	FR823380:204228-207575	1.15693	2.22982	0.00213635	0.0119944	8.52356	6.78497	11.5835	15.8906	8.54462	11.5399
NCLIV_013310	NCLIV_013310	hypothetical+protein	FR823386:1016023-1020349	1.15984	2.23433	0.000484305	0.00333981	11.4288	9.09763	15.5318	21.2995	11.4531	15.468
NCLIV_012520	NCLIV_012520	putative+3'5'-cyclic+nucleotide+phosphodiesterase	FR823386:230072-239057	1.18023	2.26613	3.51561e-09	8.14049e-08	41.6269	33.1361	56.5709	78.2765	42.0906	56.8455
NCLIV_067410	NCLIV_067410	conserved+hypothetical+protein	FR823393:5597234-5601635	1.1887	2.27948	0.00133286	0.00797428	8.83227	7.03072	12.0031	16.8294	9.04946	12.2218
NCLIV_026900	NCLIV_026900	conserved+hypothetical+protein	FR823389:2408713-2414661	1.20571	2.3065	0.00144607	0.00856134	8.23328	6.5539	11.189	15.8876	8.54305	11.5378
NCLIV_012450	NCLIV_012450	conserved+hypothetical+protein	FR823386:171450-172679	1.20829	2.31064	5.23423e-14	2.34808e-12	60.1634	47.8916	81.7621	115.285	61.9909	83.7218
NCLIV_005970	NCLIV_005970	putative+oocyst+wall+protein	FR823382:1279477-1281067	1.20874	2.31135	6.1123e-25	6.51047e-23	207.371	165.073	281.817	397.098	213.526	288.378
NCLIV_064170	NCLIV_064170	conserved+hypothetical+protein	FR823393:3163247-3164166	1.21769	2.32573	7.04194e-08	1.25056e-06	29.8902	23.7934	40.6208	57.7349	31.0451	41.9279
NCLIV_0269	NCLIV_0269	GDA1/CD39+(nucleoside+phosphatase)+family+domain+containing+protein	FR823389:2462254-2467953	1.22761	2.34178	1.23822e-06	1.70335e-05	19.296	15.3601	26.2233	37.5864	20.2108	27.2957
NCLIV_066090	NCLIV_066090	putative+leucine+rich+repeat+protein	FR823393:4634766-4636124	1.22872	2.34359	0.0045945	0.0229587	6.34902	5.05398	8.62831	12.4876	6.71481	9.06868
NCLIV_049380	NCLIV_049380	conserved+hypothetical+protein	FR823391:3929424-3932582	1.23625	2.35585	0.000552787	0.00374009	9.16844	7.29831	12.4599	18.0545	9.70822	13.1114
NCLIV_057140	NCLIV_057140	conserved+hypothetical+protein	FR823392:3523739-3526017	1.23959	2.36132	2.50008e-11	8.24804e-10	41.2167	32.8095	56.0134	80.7678	43.4302	58.6546
NCLIV_058520	NCLIV_058520	conserved+hypothetical+protein	FR823392:4688024-4691023	1.24081	2.36332	1.03317e-05	0.000113954	16.927	13.4743	23.0038	33.294	17.9028	24.1786
NCLIV_057150	NCLIV_057150	hypothetical+protein	FR823392:3530617-3537085	1.24111	2.36381	0.000897781	0.00569206	8.53106	6.79094	11.5937	16.8672	9.06977	12.2492
NCLIV_052740	NCLIV_052740	SRS+domain-containing+protein	FR823391:6699901-6700893	1.24263	2.36629	0.00284451	0.0153734	6.67488	5.31338	9.07116	13.2498	7.12462	9.62215
NCLIV_034381	NCLIV_034381	SRS+domain-containing+protein	FR823390:3445143-3446291	1.24743	2.37418	0.00332118	0.0175429	6.69164	5.32671	9.09393	13.3273	7.16631	9.67846
NCLIV_049510	NCLIV_049510	SRS+domain-containing+protein	FR823391:4075532-4076059	1.25193	2.3816	1.58772e-05	0.000166265	16.2803	12.9595	22.1249	32.2806	17.3578	23.4426
NCLIV_044250	NCLIV_044250	conserved+hypothetical+protein	FR823385:4833334-4876362	1.264	2.4016	4.56269e-16	2.6787e-14	74.2806	59.1293	100.947	147.908	79.5326	107.413
NCLIV_053260	NCLIV_053260	putative+platelet+binding+protein+GspB	FR823392:110851-114957	1.27579	2.42132	1.5419e-07	2.53784e-06	22.3869	17.8206	30.4238	45.0643	24.2319	32.7263
NCLIV_002220	NCLIV_002220	srs+domain-containing+protein	FR823380:2091593-2092786	1.27867	2.42615	0.00331937	0.0175429	6.02432	4.79551	8.18705	12.281	6.60372	8.91866
NCLIV_044760	NCLIV_044760	conserved+hypothetical+protein	FR823385:5397027-5406693	1.28631	2.43903	0.00455448	0.0228214	5.38122	4.28359	7.31308	11.0466	5.93995	8.02219
NCLIV_024520	NCLIV_024520	hypothetical+protein	FR823389:539995-545081	1.29835	2.45947	0.000988125	0.00619059	7.27676	5.79249	9.88911	15.0011	8.06633	10.894
NCLIV_026560	NCLIV_026560	Cell+wall+surface+anchor+family+protein,+related	FR823389:2112526-2123581	1.30424	2.46954	0.000326075	0.00234673	8.55079	6.80665	11.6205	17.6687	9.50077	12.8313
NCLIV_046430	NCLIV_046430	putative+protein+kinase	FR823391:1369572-1372709	1.31096	2.48106	7.28383e-29	9.20478e-27	260.898	207.682	354.56	536.244	288.348	389.428
NCLIV_028730	NCLIV_028730	putative+peroxisomal-type+ATPase	FR823389:3825761-3833090	1.31413	2.48652	0.00452896	0.022724	5.07071	4.03642	6.8911	10.6248	5.71316	7.71591
NCLIV_069020	NCLIV_069020	ATP-dependent+RNA+helicase,+putative	CADU01000282:170-2844	1.31671	2.49098	1.5918e-09	3.93138e-08	28.3034	22.5302	38.4643	58.5711	31.4947	42.5352
NCLIV_050890	NCLIV_050890	putative+KR+domain+domain-containing+protein	FR823391:5230586-5233667	1.31932	2.49549	1.91311e-05	0.000196475	12.306	9.79591	16.7239	25.6153	13.7738	18.6022
NCLIV_033310	NCLIV_033310	hypothetical+protein	FR823390:2568928-2570119	1.31968	2.4961	1.4137e-36	2.39559e-34	572.86	456.011	778.516	1184.36	636.849	860.096
NCLIV_067170	NCLIV_067170	conserved+hypothetical+protein	FR823393:5434838-5436944	1.32267	2.50129	2.74327e-10	7.74767e-09	37.0823	29.5184	50.3948	76.9937	41.4008	55.9139
NCLIV_000800	NCLIV_000800	hypothetical+protein	FR823380:669971-673175	1.32365	2.50299	2.5502e-09	6.03628e-08	28.0215	22.3059	38.0812	58.2673	31.3313	42.3145
NCLIV_001225	NCLIV_001225	unspecified+product	FR823380:1094361-1096623	1.33311	2.51945	1.02262e-08	2.19732e-07	23.386	18.6158	31.7815	48.9809	26.3378	35.5706
NCLIV_020010	NCLIV_020010	putative+F5/8+type+C+domain-containing+protein	FR823388:720759-726583	1.33613	2.52472	1.58602e-08	3.31243e-07	23.2627	18.5177	31.614	48.8276	26.2554	35.4593
NCLIV_049360	NCLIV_049360	conserved+hypothetical+protein	FR823391:3921073-3922947	1.34066	2.53267	3.73952e-06	4.5783e-05	15.1991	12.0988	20.6555	32.0668	17.2429	23.2874
NCLIV_019900	NCLIV_019900	hypothetical+protein	FR823388:571981-578693	1.34091	2.53311	0.0001051	0.00088947	11.2688	8.97024	15.3143	23.824	12.8106	17.3013
NCLIV_006430	NCLIV_006430	conserved+hypothetical+protein	FR823382:1679577-1701716	1.34795	2.54549	9.52849e-08	1.64075e-06	21.3842	17.0223	29.061	45.2669	24.3408	32.8734
NCLIV_044060	NCLIV_044060	hypothetical+protein	FR823385:4636263-4645345	1.35503	2.55802	2.12496e-37	3.77232e-35	335.165	266.8	455.488	710.205	381.889	515.76
NCLIV_000990	NCLIV_000990	conserved+hypothetical+protein	FR823380:822700-832948	1.36743	2.58011	0.00104705	0.00647101	6.31691	5.02842	8.58468	13.6914	7.36209	9.94287
NCLIV_037530	NCLIV_037530	conserved+hypothetical+protein	FR823390:6008883-6011989	1.38093	2.60437	0.00037566	0.00265994	7.27365	5.79002	9.88489	15.8853	8.54178	11.5361
NCLIV_036370	NCLIV_036370	conserved+hypothetical+protein	FR823390:5056434-5056958	1.39117	2.62291	0.00699743	0.0327102	4.50018	3.58226	6.11574	9.97669	5.36464	7.24521
NCLIV_002700	NCLIV_002700	conserved+hypothetical+protein	FR823381:279788-284890	1.39988	2.63881	0.00285765	0.0154207	4.7502	3.78128	6.45552	10.5829	5.69062	7.68546
NCLIV_013240	NCLIV_013240	conserved+hypothetical+protein	FR823386:942496-944200	1.40559	2.64927	5.4011e-10	1.45908e-08	25.8702	20.5933	35.1576	56.9608	30.6288	41.3657
NCLIV_025910	NCLIV_025910	Histone+H2A,+related	FR823389:1571538-1571945	1.4151	2.66677	0.00910077	0.0407295	3.7711	3.00189	5.12492	8.52992	4.58669	6.19455
NCLIV_069090	NCLIV_069090	hypothetical+protein	CADU01000288:1218-5088	1.41606	2.66856	2.51647e-23	2.50171e-21	106.765	84.9875	145.093	236.15	126.982	171.496
NCLIV_059220	NCLIV_059220	conserved+hypothetical+protein	FR823392:5214878-5222516	1.42745	2.68971	3.21248e-19	2.6035e-17	57.6433	45.8855	78.3372	128.605	69.1531	93.3947
NCLIV_065960	NCLIV_065960	Dynein+heavy+chain+1,+axonemal,+related	FR823393:4524219-4567872	1.4511	2.73416	6.56626e-15	3.28577e-13	37.8159	30.1024	51.3917	85.8405	46.1579	62.3385
NCLIV_002790	NCLIV_002790	conserved+hypothetical+protein	FR823381:330809-370100	1.45591	2.74329	1.67593e-06	2.2434e-05	12.6288	10.0528	17.1625	28.9038	15.5421	20.9903
NCLIV_067100	NCLIV_067100	Cysteine+synthase,+related	FR823393:5376653-5381778	1.45841	2.74805	1.58044e-10	4.65762e-09	24.019	19.1198	32.6418	54.8775	29.5086	39.8528
NCLIV_022740	NCLIV_022740	putative+enoyl-CoA+hydratase/isomerase+family+protein	FR823388:3088105-3090631	1.46446	2.7596	5.1836e-05	0.000470754	8.22351	6.54613	11.1757	19.01	10.222	13.8054
NCLIV_016090	NCLIV_016090	conserved+hypothetical+protein	FR823387:616342-629701	1.46746	2.76534	0.000507097	0.00346238	6.30283	5.01722	8.56554	14.6498	7.87746	10.6389
NCLIV_006930	NCLIV_006930	hypothetical+protein	FR823383:35472-36161	1.46936	2.76899	0.00985795	0.0434146	3.15689	2.51296	4.2902	7.45707	4.00979	5.41543
NCLIV_049930	NCLIV_049930	conserved+hypothetical+protein	FR823391:4507674-4521182	1.47504	2.77992	8.43699e-05	0.00072977	7.5891	6.04112	10.3136	17.6902	9.51235	12.8469
NCLIV_019610	NCLIV_019610	hypothetical+protein	FR823388:278372-294110	1.48119	2.79179	1.36747e-26	1.5931e-24	87.3615	69.542	118.724	202.2	108.726	146.84
NCLIV_000780	NCLIV_000780	carboxyvinyl-carboxyphosphonate+phosphorylmutase+protein,+related	FR823380:650835-654115	1.50816	2.84447	1.59182e-14	7.5596e-13	34.6805	27.6065	47.1307	81.9205	44.0501	59.4918
NCLIV_027990	NCLIV_027990	putative+WD+domain,+G-beta+repeat-containing+protein	FR823389:3207074-3211414	1.51345	2.85491	0.000361866	0.00257204	5.70447	4.54091	7.75237	13.7157	7.37518	9.96055
NCLIV_014810	NCLIV_014810	putative+Patched+family+domain+containing+protein	FR823386:2191588-2201921	1.52834	2.88453	0.000777201	0.00501715	5.10093	4.06047	6.93216	12.4193	6.67806	9.01906
NCLIV_047410	NCLIV_047410	hypothetical+protein	FR823391:2143131-2144063	1.53313	2.89413	0.000649533	0.00427957	5.05507	4.02397	6.86984	12.3487	6.64011	8.9678
NCLIV_059080	NCLIV_059080	conserved+hypothetical+protein	FR823392:5049642-5060354	1.54677	2.92161	1.83626e-08	3.76131e-07	17.2777	13.7535	23.4804	42.0426	22.607	30.5319
NCLIV_035550	NCLIV_035550	GH22156,+related	FR823390:4370436-4382996	1.5474	2.92291	0.0016139	0.00937166	4.11381	3.27469	5.59066	10.1943	5.48165	7.40324
NCLIV_060290	NCLIV_060290	conserved+hypothetical+protein	FR823393:2479-3270	1.56282	2.9543	3.29231e-05	0.000315926	7.27802	5.79349	9.89083	18.0474	9.7044	13.1063
NCLIV_069530	NCLIV_069530	hypothetical+protein	CADU01000303:280120-294844	1.59456	3.02003	0.00111392	0.00681326	4.13108	3.28845	5.61414	10.5824	5.69036	7.68511
NCLIV_043290	NCLIV_043290	conserved+hypothetical+protein	FR823385:4024669-4026224	1.60174	3.03508	0.00847197	0.038283	2.53087	2.01464	3.43945	6.61215	3.55547	4.80183
NCLIV_057880	NCLIV_057880	hypothetical+protein	FR823392:4159499-4160992	1.60576	3.04356	0.00892109	0.0400455	2.54669	2.02723	3.46096	6.67207	3.58768	4.84535
NCLIV_004020	NCLIV_004020	tryptophan-rich+antigen+(Pv-fam-a),+related	FR823381:1365840-1367807	1.62848	3.09187	0.00153946	0.00900956	3.80948	3.03245	5.17709	10.0146	5.38502	7.27274
NCLIV_068600	NCLIV_068600	conserved+hypothetical+protein	FR823393:6402041-6408799	1.63134	3.09801	1.00759e-07	1.72308e-06	11.4146	9.08635	15.5125	29.5447	15.8867	21.4558
NCLIV_008245	NCLIV_008245	hypothetical+protein	FR823383:1180865-1201008	1.64182	3.12059	5.07157e-27	6.00216e-25	59.1579	47.0912	80.3955	153.143	82.3476	111.215
NCLIV_052260	NCLIV_052260	unspecified+product	FR823391:6421599-6435349	1.65603	3.15147	0.00175965	0.0100459	3.46954	2.76185	4.71511	9.31847	5.0107	6.7672
NCLIV_011720	NCLIV_011720	hypothetical+protein	FR823384:1784133-1801836	1.65948	3.15903	5.32986e-08	9.8365e-07	11.4128	9.08491	15.51	30.1237	16.198	21.8763
NCLIV_037300	NCLIV_037300	conserved+hypothetical+protein	FR823390:5811876-5834830	1.68395	3.21306	0.000350907	0.00250447	4.42279	3.52065	6.01057	12.0395	6.47384	8.74324
NCLIV_036180	NCLIV_036180	hypothetical+protein	FR823390:4914102-4948816	1.71191	3.27594	0.0025366	0.0139065	2.84065	2.26123	3.86044	7.98543	4.2939	5.79913
NCLIV_001400	NCLIV_001400	unspecified+product	FR823380:1292581-1302111	1.71443	3.28167	2.64588e-43	6.5759e-41	135.331	107.727	183.914	368.067	197.916	267.295
NCLIV_022830	NCLIV_022830	conserved+hypothetical+protein	FR823388:3179786-3182984	1.7151	3.28319	0.000325597	0.00234658	4.11597	3.27642	5.59361	11.4728	6.1691	8.33168
NCLIV_003880	NCLIV_003880	conserved+hypothetical+protein	FR823381:1293930-1294803	1.76134	3.39012	0.00917097	0.0409699	1.90825	1.51902	2.59331	5.65557	3.04109	4.10715
NCLIV_026330	NCLIV_026330	conserved+hypothetical+protein	FR823389:1909532-1916839	1.78429	3.44448	8.0059e-15	3.97947e-13	22.2107	17.6803	30.1843	63.6598	34.2309	46.2306
NCLIV_063000	NCLIV_063000	Coiled-coil+protein,+related	FR823393:2227231-2239744	1.79408	3.46795	4.47689e-22	4.17246e-20	38.1105	30.3369	51.7921	109.755	59.0173	79.7058
NCLIV_014420	NCLIV_014420	conserved+hypothetical+protein	FR823386:1877854-1883344	1.79595	3.47244	2.74321e-06	3.45496e-05	6.34634	5.05185	8.62467	18.5558	9.97775	13.4754
NCLIV_017220	NCLIV_017220	hypothetical+protein	FR823387:1468892-1470642	1.79848	3.47853	3.20453e-06	3.98216e-05	6.33443	5.04237	8.60849	18.5535	9.97652	13.4738
NCLIV_050200	NCLIV_050200	GF18580,+related	FR823391:4711640-4754365	1.80631	3.49747	1.48002e-13	6.19946e-12	17.7132	14.1002	24.0723	51.6114	27.7523	37.4809
NCLIV_052500	NCLIV_052500	hypothetical+protein	FR823391:6559599-6562872	1.8167	3.52275	2.70094e-47	7.4586e-45	110.615	88.0521	150.325	323.013	173.689	234.576
NCLIV_059880	NCLIV_059880	conserved+hypothetical+protein	FR823392:5721615-5761053	1.82427	3.54127	5.54338e-07	8.21699e-06	6.9784	5.55499	9.48365	20.7794	11.1734	15.0903
NCLIV_001350	NCLIV_001350	putative+EGF-like+domain-containing+protein	FR823380:1223647-1229239	1.82738	3.54892	0.000278117	0.00204098	3.49336	2.7808	4.74747	10.5828	5.69054	7.68536
NCLIV_029430	NCLIV_029430	conserved+hypothetical+protein	FR823389:4444662-4454042	1.83926	3.57826	0.000466029	0.00323832	3.17176	2.52481	4.31043	9.71757	5.2253	7.05703
NCLIV_021800	NCLIV_021800	hypothetical+protein	FR823388:2243876-2287981	1.84346	3.58871	3.3411e-18	2.39531e-16	23.4674	18.6807	31.8922	70.0642	37.6747	50.8816
NCLIV_037560	NCLIV_037560	conserved+hypothetical+protein	FR823390:6025214-6026471	1.85983	3.62964	0.00134625	0.00803653	2.54885	2.02895	3.46389	7.98792	4.29524	5.80094
NCLIV_054260	NCLIV_054260	hypothetical+protein	FR823392:900320-905773	1.86132	3.63339	2.12106e-10	6.10602e-09	11.0806	8.82044	15.0585	33.6654	18.1025	24.4483
NCLIV_037980	NCLIV_037980	conserved+hypothetical+protein	FR823390:6363899-6367570	1.86189	3.63484	2.80958e-46	7.48151e-44	99.3775	79.107	135.054	299.468	161.029	217.478
NCLIV_051320	NCLIV_051320	conserved+hypothetical+protein	FR823391:5578875-5583688	1.86887	3.65248	0.00228779	0.0127107	2.22739	1.77306	3.02703	7.0666	3.79983	5.13186
NCLIV_018840	NCLIV_018840	conserved+hypothetical+protein	FR823387:2866980-2867477	1.88262	3.68745	1.90254e-30	2.57915e-28	44.142	35.1381	59.9889	135.13	72.6616	98.1331
NCLIV_041840	NCLIV_041840	conserved+hypothetical+protein	FR823385:2817382-2818197	1.88264	3.68748	2.24525e-18	1.64123e-16	24.9182	19.8355	33.8638	76.4249	41.095	55.5008
NCLIV_001410	NCLIV_001410	conserved+hypothetical+protein	FR823380:1307178-1309960	1.88761	3.70022	4.33657e-17	2.78737e-15	20.3192	16.1746	27.6137	62.5985	33.6603	45.4599
NCLIV_064130	NCLIV_064130	conserved+hypothetical+protein	FR823393:3125593-3127842	1.88947	3.70499	1.28145e-09	3.27209e-08	10.1042	8.04323	13.7316	31.3348	16.8493	22.7558
NCLIV_059130	NCLIV_059130	hypothetical+protein	FR823392:5119457-5120062	1.89316	3.71448	6.66934e-49	2.16202e-46	100.302	79.8431	136.311	308.878	166.089	224.312
NCLIV_035930	NCLIV_035930	hypothetical+protein	FR823390:4729115-4730605	1.89878	3.72896	0.00364541	0.0188883	1.9009	1.51317	2.58333	6.20656	3.33737	4.50729
NCLIV_000920	NCLIV_000920	putative+tRNA(guanine-N(7)-)-methyltransferase	FR823380:758664-764777	1.91697	3.77628	3.4882e-31	4.81629e-29	44.3999	35.3435	60.3395	139.195	74.8478	101.086
NCLIV_011760	NCLIV_011760	hypothetical+protein	FR823384:1826193-1831350	1.9222	3.78999	6.34987e-43	1.47952e-40	84.602	67.3454	114.974	265.877	142.967	193.084
NCLIV_017690	NCLIV_017690	conserved+hypothetical+protein	FR823387:1908066-1912862	1.92782	3.8048	6.20255e-40	1.2499e-37	60.0298	47.7853	81.5805	189.496	101.895	137.615
NCLIV_004220	NCLIV_004220	unspecified+product	FR823381:1539091-1540830	1.92995	3.81041	3.55413e-06	4.37286e-05	5.08018	4.04395	6.90396	16.3784	8.80695	11.8942
NCLIV_001470	NCLIV_001470	putative+rhodanese-like+domain+containing+protein	FR823380:1375239-1378710	1.9413	3.8405	1.2133e-23	1.23923e-21	32.1017	25.5538	43.6262	102.446	55.0869	74.3976
NCLIV_002710	NCLIV_002710	conserved+hypothetical+protein	FR823381:288329-291122	1.95406	3.87463	0.0106455	0.0463087	1.26916	1.01028	1.72478	4.42757	2.38078	3.21537
NCLIV_041540	NCLIV_041540	putative+adenylyl+cyclase	FR823385:2538372-2543867	1.95635	3.88078	5.72404e-18	3.96746e-16	22.8176	18.1634	31.0091	73.6816	39.6198	53.5086
NCLIV_059230	NCLIV_059230	hypothetical+protein	FR823392:5226209-5237684	1.98403	3.95598	0.00210971	0.0118986	1.90325	1.51503	2.58651	6.60107	3.54951	4.79378
NCLIV_000080	NCLIV_000080	conserved+hypothetical+protein	FR823380:93992-104253	1.99179	3.9773	8.9358e-14	3.82904e-12	13.9611	11.1134	18.9731	46.3535	24.9251	33.6626
NCLIV_038021	NCLIV_038021	unspecified+product	FR823390:6404052-6408827	1.99264	3.97964	1.72396e-08	3.57051e-07	6.98351	5.55905	9.49058	23.3843	12.5742	16.982
NCLIV_033570	NCLIV_033570	putative+protein+kinase+(incomplete+catalytic+triad)	FR823390:2786289-2788200	2.00891	4.02479	0.000108235	0.000910172	3.17304	2.52582	4.31215	10.951	5.88854	7.95276
NCLIV_064070	NCLIV_064070	conserved+hypothetical+protein	FR823393:3087938-3092729	2.02845	4.07967	1.12063e-41	2.45748e-39	52.2423	41.5862	70.9972	176.885	95.1142	128.456
NCLIV_037830	NCLIV_037830	putative+RNA+recognition+motif-containing+protein	FR823390:6204047-6213088	2.0345	4.09681	1.29024e-36	2.23721e-34	43.2932	34.4625	58.8354	147.264	79.1862	106.945
NCLIV_069520	NCLIV_069520	hypothetical+protein	CADU01000303:252817-265817	2.04587	4.12922	1.50555e-13	6.27118e-12	12.9006	10.2692	17.5319	44.4987	23.9277	32.3156
NCLIV_010030	NCLIV_010030	Bradyzoite+surface+protein+BSR4	FR823384:392666-393907	2.06892	4.19573	7.56e-06	8.59258e-05	4.4097	3.51023	5.99278	15.7124	8.44884	11.4106
NCLIV_028010	NCLIV_028010	putative+cAMP-specific+phosphodiesterase	FR823389:3222654-3231055	2.0864	4.24688	9.07542e-10	2.36595e-08	7.29723	5.80879	9.91694	26.0659	14.0161	18.9294
NCLIV_062190	NCLIV_062190	GK22245,+related	FR823393:1559720-1562141	2.12054	4.34856	6.72747e-08	1.20373e-06	5.38616	4.28752	7.31979	19.8104	10.6524	14.3866
NCLIV_010930	NCLIV_010930	unspecified+product	FR823384:1128341-1132507	2.12083	4.34945	1.41943e-49	4.81057e-47	57.7628	45.9807	78.4996	208.471	112.098	151.394
[truncated: 103 more rows]
