# Supplementary material for: Gene Expression Profiling of Neospora caninum in Bovine Macrophages Reveals Differences Between Isolates Associated With Key Parasite Functions
Source: Front Cell Infect Microbiol. 2019 Oct 15;9:354. doi: 10.3389/fcimb.2019.00354 (PMC6803445; doi:10.3389/fcimb.2019.00354)
Supplement: Supplementary file 3 [file Table_3.XLSX]

## Sheet: Supplementary Table S3
	Supplementary Table S3. Functional classification of N. caninum genes differentially expressed between the low virulent isolate Nc-Spain1H and the high virulent isolate Nc-Spain7 in bovine macrophages.
	Negative FC values correspond to genes up-regulated in Nc-Spain7 and positive values to genes up-regulated in Nc-Spain1H.
		Nc gene id	Nc gene description	FC	padj	Tg gene id	Tg gene description	Function	References
		Growth, cell cycle
	Nc-Spain7	NCLIV_061380	hypothetical protein	-2.08089	0.000167359	TGME49_219100	cyclin-dependent kinase regulatory subunit protein	Cell cycle regulation	Nigg, 1995
		NCLIV_012540	hypothetical protein	-2.9129	0.000124413	TGME49_220440	cyclin-dependent kinase regulatory subunit protein
		NCLIV_029370	conserved hypothetical protein	-2.09411	0.00800184	TGME49_255430	Rad9 protein	Cell cycle checkpoint protein required for cell cycle arrest and DNA damage repair	Clarke and Giménez‐Abián, 2000
		NCLIV_021700	conserved hypothetical protein	-2.5451	0.000366284	TGVEG_203260	Rad17 cell cycle checkpoint protein
		NCLIV_044150	conserved hypothetical protein	-3.18229	0.000385394	TGVEG_206390	Hus1-like protein	DNA damage checkpoint	ToxoDB (GO:0000077)
		NCLIV_001000	conserved hypothetical protein	-2.0878	0.00630436	TGME49_294250	WD domain, G-beta repeat-containing protein	Implicated in a wide range of functions from signal transduction and transcription regulation to apoptosis and control of cell cycle	Stirnimann et al., 2010
		NCLIV_023430	putative WD domain, G-beta repeat-containing protein	-7.42231	3.41324e-06	TGME49_281480	WD domain, G-beta repeat-containing protein
		NCLIV_0253	GTP-binding conserved hypothetical domain-containing protein	-2.4795	0.000789571	TGME49_262510	GTP-binding protein engB, putative	Cell division control	Leipe et al., 2002
		NCLIV_038630	conserved hypothetical protein	-2.1191	4.79431e-06	TGME49_267550	leucine-rich repeat protein LRR1	May play a role in the regulation of the T. gondii cell cycle through the modulation of phosphatase activity	Daher et al., 2007
	Nc-Spain1H	NCLIV_027990	putative WD domain, G-beta repeat-containing protein	2.85491	0.00257204	TGME49_258530	flagellar associated protein	Implicated in a wide range of functions from signal transduction and transcription regulation to apoptosis and control of cell cycle	Stirnimann et al., 2010
		NCLIV_062990	hypothetical protein	4.07967	2.45748e-39	TGME49_245752	WD domain, G-beta repeat-containing protein
		NCLIV_063000	Coiled-coil protein, related	3.70499	3.27209e-08	TGME49_245752	WD domain, G-beta repeat-containing protein
		NCLIV_006430	conserved hypothetical protein	2.54549	1.64075e-06	TGVEG_297390	putative WD domain, G-beta repeat protein
		NCLIV_034180	conserved hypothetical protein	7.90732	5.4202e-07	TGVEG_273472	tumor suppressor mitostatin	Role in guarding the fidelity of mitosis, enabling the optimal activation of the spindle checkpoint	Lauriola, 2017
		NCLIV_049930	conserved hypothetical protein	2.49549	0.000196475	TGME49_235515	MORN repeat-containing protein	Apicoplast segregation and daughter cell budding	Lorestani et al., 2010
		NCLIV_061840	hypothetical protein	12.7824	2.16283e-29	TGME49_218400	NEK kinase	Kinase family first identified as essential for division in Aspergilus nidulans. Its members have been identified as cell cycle regulators in eukaryotes	Gubbels et al., 2008
		NCLIV_040930	putative NEK kinase	2.00671	3.91589e-15	TGME49_288440	NEK kinase
		Nucleic acid biosynthesis, replication, recombination, repair
	Nc-Spain7	NCLIV_038170	Hypoxanthine phosphoribosyltransferase, related	-4.39444	1.90546e-11	TGME49_200320	hypoxanthine-xanthine-guanine phosphoribosyl transferase HXGPRT	Purine metabolism (salvage)	Shanmugasundram et al., 2013
		NCLIV_032950	putative deoxyuridine 5'-triphosphate nucleotidohydrolase	-4.03765	3.34991e-41	TGME49_233140	deoxyuridine 5'-triphosphate nucleotidohydrolase, putative	Pyrimidine metabolism (biosynthesis and salvage)	Shanmugasundram et al., 2013
		NCLIV_065390	Bifunctional dihydrofolate reductase-thymidylate synthase, related	-2.7228	4.67459e-17	TGME49_249180	bifunctional dihydrofolate reductase-thymidylate synthase	Folate biosynthesis, Pyrimidine metabolism (biosynthesis and salvage)	Shanmugasundram et al., 2013
		NCLIV_016250	putative cytidine deaminase	-2.49029	4.78952e-06	TGME49_239630	cytidine and deoxycytidylate deaminase zinc-binding region domain-containing protein	Pyrimidine metabolism (biosynthesis and salvage)	Shanmugasundram et al., 2013
		NCLIV_010140	putative proliferating cell nuclear antigen	-3.05206	1.90166e-09	TGME49_320110	proliferating cell nuclear antigen PCNA2	DNA replication, chromatin remodelling, DNA repair, sister-chromatid cohesion and cell cycle control	Strzalka and Ziemienowicz, 2010
		NCLIV_065280	Proliferating cell nuclear antigen, related	-3.1424	1.04089e-23	TGME49_247460	proliferating cell nuclear antigen PCNA1
		NCLIV_033420	hypothetical protein	-2.70104	0.000126849	TGME49_233820	DNA polymerase epsilon subunit B protein	DNA replication	ToxoDB (GO:0006260)
		NCLIV_010380	DNA polymerase, related	-2.05785	1.055e-07	TGME49_319860	DNA polymerase family B protein
		NCLIV_062650	putative DNA polymerase alpha catalytic subunit	-2.00645	2.46849e-06	TGME49_217910	DNA polymerase (pol2) superfamily protein
		NCLIV_013120	putative activator 1 36 kDa	-2.03554	0.000684547	TGME49_213000	replication factor C, subunit 5, putative
		NCLIV_049750	putative replication factor c subunit	-2.63007	6.14944e-07	TGME49_235170	ATPase, AAA family protein	DNA replication and repair	ToxoDB (GO:0006260; GO:0006281)
		NCLIV_023470	Ribonuclease, related	-2.70756	2.27478e-05	TGME49_281510	ribonuclease H1 large subunit, putative	DNA replication and repair	Cerritelli and Crouch, 2009
		NCLIV_025810	conserved hypothetical protein	-2.6292	0.000108311	TGME49_261670	ribonuclease H1/H2 small subunit protein	DNA replication and repair	Cerritelli and Crouch, 2009
		NCLIV_062840	putative origin recognition complex subunit 2	-2.32122	0.0018327	TGME49_245570	origin recognition complex subunit 2 protein	DNA replication	Chesnokov, 2007
		NCLIV_060910	putative DNA replication licensing factor	-2.74367	2.70281e-13	TGME49_219700	DNA replication licensing factor MCM4, putative	DNA replication	Das et al., 2014
		NCLIV_059560	putative DNA replication licensing factor	-2.02307	3.18456e-09	TGME49_216730	MCM2/3/5 family protein
		NCLIV_068360	putative toprim domain-containing protein	-2.39958	1.37678e-05	TGME49_277530	DNA topoisomerase domain-containing protein	DNA replication and transcription	Wang, 2002
		NCLIV_050400	hypothetical protein	-2.28615	1.59565e-07	TGME49_236080	replication factor-a protein 1 (rpa1) subfamily protein	DNA replication, repair, and recombination	Broderick et al., 2009
		NCLIV_032890	T10O22.7, related	-2.49085	0.000260263	TGME49_233090	XPG N-terminal domain-containing protein	DNA repair	Fenoy et al., 2016
		NCLIV_052470	hypothetical protein	-2.55774	0.000297195	TGVEG_215550	defects in morphology 1 precursor	Single-stranded DNA 5'-3' exodeoxyribonuclease activity	ToxoDB (GO:0045145)
	Nc-Spain1H	NCLIV_0269	GDA1/CD39 (nucleoside phosphatase) family domain containing protein	2.34178	1.70335e-05	TGME49_259960	Nucleoside-diphosphatase	Purine metabolism (salvage)	Shanmugasundram et al., 2013
		NCLIV_041540	putative adenylyl cyclase	3.88078	3.96746e-16	TGME49_289170	adenylate and guanylate cyclase catalytic domain-containing protein	Purine metabolism (salvage)	Shanmugasundram et al., 2013
		RNA metabolism
	Nc-Spain7	NCLIV_017360	hypothetical protein	-2.21644	0.00404447	TGME49_242055	DEAD/DEAH box helicase domain-containing protein	Associated with most aspects of RNA processing, from transcriptional regulation to mRNA decay	Cherry and Ananvoranich, 2014
		NCLIV_053630	putative zinc finger (CCCH type) protein	-2.96725	9.14338e-17	TGME49_309200	zinc finger (CCCH type) motif-containing protein	CCCH type zinc finger proteins are RNA binding proteins with regulatory functions in mRNA metabolism	Kramer et al., 2010
		NCLIV_020280	YDL036Cp-like protein, related	-4.24512	0.00654896	TGME49_205410	RNA pseudouridine synthase superfamily protein	Catalyzes the conversion of the RNA base uridine to pseudouridine. Mutation of single pseudouridine synthases in Escherichia coli and Saccharomyces cerevisiae results in slow-growing phenotypes	Anderson et al., 2009
		NCLIV_048340	putative pseudouridylate synthase 1	-2.85675	1.45132e-06	TGME49_224210	hypothetical protein
		NCLIV_018660	conserved hypothetical protein	-2.07116	0.00590477	TGVEG_244050	PPR repeat protein	PPR proteins are sequence-specific RNA-binding proteins involved in several aspects of RNA metabolism	InterPro (IPR002885)
		NCLIV_009830	conserved hypothetical protein	-2.50573	1.67878e-06	TGVEG_320440A	XRN 5'-3' exonuclease amine-terminal protein	5'-3'-exoribonucleases are enzymes that degrade RNA by removing terminal nucleotides from the 5' endprocesses	InterPro (IPR027073)
		NCLIV_011080	unspecified product	-2.02536	1.14143e-06	TGME49_318470	AP2 domain transcription factor AP2IV-4	Cell cycle-regulated factor with peak expression in the tachyzoite S/M phase that also suppresses bradyzoite gene expression	Huang et al., 2017
		NCLIV_012905	unspecified product	-2.49334	0.000455312	TGME49_292010	transcription initiation factor IIB	Transcription factor involved in the formation of the RNA polymerase II preinitiation complex	Deng and Roberts, 2006
		NCLIV_058040	conserved hypothetical protein	-2.11639	9.12353e-05	TGME49_315300	transcription factor IIB, putative
		NCLIV_062490	unspecified product	-2.76987	1.22814e-09	TGME49_217700	AP2 domain transcription factor AP2XII-2	Transcription factor associated with tachyzoite stage	Radke et al., 2018
		NCLIV_008810	conserved hypothetical protein	-2.62189	8.60078e-05	TGME49_254520	mediator complex subunit MED11	The multisubunit Mediator (MED) complex bridges DNA-bound transcriptional regulators to the RNA polymerase II initiation machinery	Bourbon, 2008
		NCLIV_044550	conserved hypothetical protein	-2.41747	0.00552387	TGME49_306320	Myb family DNA-binding domain-containing protein	Transcriptional transactivators. Myb domain proteins control stage conversion and cell fate in a broad range of systems	Ehrenkaufer et al., 2009
		NCLIV_069870	hypothetical protein, conserved	-4.19755	9.68163e-05	TGME49_301000	methyltransferase	Methylation of protein lysine and arginine residues. Crucial roles in gene transcription	Copeland et al., 2009
		NCLIV_030730	putative acetyltransferase domain-containing protein	-3.48567	1.04677e-08	TGME49_230060	acetyltransferase, GNAT family protein	Histone-modifying proteins involved in regulating gene expression	Vanagas et al., 2013
		NCLIV_032430	conserved hypothetical protein	-2.26703	9.48052e-18	TGME49_232440	Brf1p family coiled coil protein	Component of the RNA polymerase III transcription factor TFIIIB	InterPro (IPR029529)
		NCLIV_045950	conserved hypothetical protein	-2.01743	0.00319641	TGVEG_227080	phosphorylated CTD-interacting factor 1 (PCIF1)	WW domain-containing protein that interacts with phosphorylated RNA polymerase II carboxy-terminal domain. PCIF1 may regulate negatively gene expression by RNA polymerase II	InterPro (IPR039881)
	Nc-Spain1H	NCLIV_000800	hypothetical protein	2.50299	6.03628e-08	TGME49_293830	methyltransferase domain-containing protein	Methylation of protein lysine and arginine residues. Crucial roles in gene transcription	Copeland et al., 2009
		NCLIV_010930	unspecified product	4.34945	4.81057e-47	TGME49_318610	AP2 domain transcription factor AP2IV-3	Stress-induced transcription factor. Activator of bradyzoite gene expression	Huang et al., 2017
		NCLIV_052260	unspecified product	2.36629	0.0153734	TGME49_215340	AP2 domain transcription factor AP2X-10	Transcription factor that is known to be upregulated during bradyzoite development	Melo et al., 2013
		NCLIV_037830	putative RNA recognition motif-containing protein	4.09681	2.23721e-34	TGME49_268380	RNA recognition motif-containing protein	One of the most common domains of RNA binding proteins (RBP). Proteins containing this domain are involved in the RNA cycle. RBPs are essential for the fast gene expression remodeling that occurs during cell differentiation or the stress response	Alves and Goldenberg, 2016
		NCLIV_059230	hypothetical protein	15.3618	0.0249974	TGME49_217182	RNA-dependent RNA polymerase RDP	RNA-directed 5'-3' RNA polymerase activity	ToxoDB (GO:0003968)
		NCLIV_059220	conserved hypothetical protein	3.54127	8.21699e-06	TGP89_217182B	RNA-dependent RNA polymerase RDP
		NCLIV_069020	ATP-dependent RNA helicase, putative	2.66856	2.50171e-21	TGME49_223440	DEAD/DEAH box helicase domain-containing protein	Associated with most aspects of RNA processing, from transcriptional regulation to mRNA decay	Cherry and Ananvoranich, 2014
		NCLIV_046880	conserved hypothetical protein	9.48004	0.00812892	TGP89_225950	putative zinc finger, CCCH type domain protein	CCCH type zinc finger proteins are RNA binding proteins with regulatory functions in mRNA metabolism	Kramer et al., 2010
		Protein synthesis, modifications, folding and turnover
	Nc-Spain7	NCLIV_014740	unspecified product	-2.39285	0.0191049	TGME49_285530	ribosomal protein RPL35	Ribosomal protein
		NCLIV_001900	putative histidyl-tRNAsynthetase	-2.91982	4.69429e-37	TGME49_295050	tRNA ligase class II core domain (G, H, P, S and T) domain-containing protein	Synthesis of histidyl-transfer RNA, essential for the incorporation of histidine into proteins	Freist et al., 1999
		NCLIV_028690	Multisite-specific tRNA m(5)C methyltransferase, related	-2.22187	0.011942	TGME49_255250	tRNA (cytosine(34)-C(5))-methyltransferase, putative	The primary role of tRNA modifications is the regulation of protein synthesis	Hori, 2014
		NCLIV_010830	putative UDP-N-acetyl-D-galactosamine:polypeptide N-acetylgalactosaminyltransferase T3	-5.43108	2.43374e-12	TGME49_318730	glycosyl transferase	Mucin-type O-glycosylation	(Stwora-Wojczyk et al., 2004)
		NCLIV_006510	putative TCP-1/cpn60 family chaperonin	-2.31665	1.49753e-12	TGME49_297500	T-complex protein 1 eta subunit	Protein folding	ToxoDB (GO:0006457)
		NCLIV_029610	putative prefoldin subunit 3	-2.41471	0.00010547	TGME49_257490	prefoldin subunit superfamily protein	Protein folding	InterPro (IPR016655)
		NCLIV_060300	cDNA, FLJ96396, highly similar to Homo sapiens ERO1-like beta (S. cerevisiae) (ERO1LB), mRNA, related	-2.2603	2.19802e-11	TGME49_300380	endoplasmic reticulum oxidoreductin, putative	Protein folding	(Hague et al., 2012)
		NCLIV_048880	Proteasome subunit beta type-7, related	-2.00374	1.9684e-10	TGME49_223590	proteasome subunit	Proteasomes are large complexes with crucial roles in many cellular pathways by degrading proteins in the nucleus and cytosol to enforce quality control and regulate many basic cellular processes	(Muñoz et al., 2015)
		NCLIV_057270	hypothetical protein	-2.04969	0.000247754	TGME49_314090	proteasome beta subunit
		NCLIV_061460	Family T1, proteasome beta subunit, threonine peptidase, related	-2.08664	1.33971e-10	TGME49_218920	proteasome subunit beta type, putative
		NCLIV_002110	putative TPR domain-containing protein	-4.15681	0.00012557	TGME49_295730	tetratricopeptide repeat-containing protein	It mediates protein-protein interactions and the assembly of protein complexes. Proteins containing TPRs are involved in a wide range of biological processes, such as cell cycle regulation, transcriptional control, and protein transport and folding.	InterPro (IPR013026)
		NCLIV_025530	putative TPR domain-containing protein	-2.70484	3.4161e-20	TGME49_262100	tetratricopeptide repeat-containing protein
		NCLIV_055940	putative TPR domain-containing protein	-2.68178	3.6346e-07	TGME49_312380	tetratricopeptide repeat-containing protein
		NCLIV_040320	putative ubiquitin-activating enzyme	-2.04412	0.00125254	TGME49_264880	NEDD8-activating enzyme E1 catalytic subunit	Ubiquitin-like protein. NEDD8 appears to play an essential role in cell cycle control in actively proliferating cells.	Ponts et al., 2008
		NCLIV_052060	Cullin-associated NEDD8-dissociated protein 1,related	-2.77456	6.74855e-05	TGME49_215040	HEAT repeat-containing protein
		NCLIV_011590	hypothetical protein	-2.73881	4.43417e-05	TGVEG_211390	putative SUMO activating enzyme	Ubiquitin-like protein. Reversible modification by SUMO is generally associated with nuclear transport, subnuclear targeting and genome stability.	Ponts et al., 2008
		NCLIV_008220	putative M16 family peptidase	-2.83567	6.34489e-06	TGME49_253890	peptidase M16 inactive domain-containing protein	Metallopeptidase (Mitochondrial processing peptidase)	Escotte Binet et al., 2018
		NCLIV_024260	conserved hypothetical protein	-5.62069	0.000283532	TGVEG_263690	DIE2/alg10 family protein	dolichol-linked oligosaccharide biosynthetic process	ToxoDB (GO:0006488)
		NCLIV_051570	conserved hypothetical protein	-3.09388	0.00207824	TGME49_214330	DnaJ domain-containing protein	DnaJ/Hsp40 (heat shock protein 40) proteins are important for protein translation, folding, unfolding, translocation, and degradation, mainly by stimulating the ATPase activity of Hsp70s chaperones	Qiu et al., 2006
		NCLIV_005800	unspecified product	-2.07048	0.00333981	TGVEG_222410	lipase maturation factor	Lipase maturation in the ER.	InterPro (IPR009613)
	Nc-Spain1H	NCLIV_000920	putative tRNA(guanine-N(7)-)-methyltransferase	3.77628	4.81629e-29	TGME49_294180	tRNA -methyltransferase family protein	The primary role of tRNA modifications is the regulation of protein synthesis	Hori, 2014
		NCLIV_011760	hypothetical protein	3.78999	1.47952e-40	TGME49_211230	eukaryotic initiation factor-2B, alpha subunit, putative	Regulation of translation iniciation. Mediates Responses to ER and Cytosolic Stresses in T. gondii	Narasimhan et al., 2008
		NCLIV_054260	hypothetical protein	2.06814	8.89282e-36	TGME49_310160	argonaute AGO	RNA induced gene silencing	Riyahi et al., 2006
		NCLIV_067480	putative UDP-N-acetyl-D-galactosamine:polypeptide N-acetylgalactosaminyltransferase T5	4.94253	4.8344e-05	TGME49_2595301	GalNac	Mucin-type O-glycosylation	(Stwora-Wojczyk et al., 2004)
		NCLIV_036180	hypothetical protein	3.27594	0.0139065	TGME49_270580	HECT-domain (ubiquitin-transferase) domain-containing protein	Ubiquitin-protein transferase activity	InterPro (IPR000569)
						TGME49_270595	UBA/TS-N domain-containing protein
		NCLIV_068600	conserved hypothetical protein	2.00482	4.18815e-15	TGME49_276960	tetratricopeptide repeat-containing protein	It mediates protein-protein interactions and the assembly of protein complexes. Proteins containing TPRs are involved in a wide range of biological processes, such as cell cycle regulation, transcriptional control, and protein transport and folding.	InterPro (IPR013026)
		Histone modification, chromatin structure and microtubule dynamics
	Nc-Spain7	NCLIV_010790	putative Aurora kinase(incomplete catalytic triad)	-2.61875	1.91809e-06	TGME49_318770	aurora kinase(incomplete catalytic triad)	Serine/threonine protein kinases that regulate key events associated with chromatin condensation, centrosome and spindle function and cytokinesis	Berry et al., 2016
		NCLIV_000330	conserved hypothetical protein	-3.4407	5.98244e-06	TGME49_293380	histone lysine acetyltransferase HAT1	Histone acetylation	Parthun, 2007
		NCLIV_006700	structural maintenance of chromosome 2, related	-2.34623	0.00119861	-		Responsible for the large-scale organizational dynamics of chromatin, including chromosome condensation	Lyer et al., 2008
		NCLIV_031540	putative chromosome condensation protein	-2.1766	6.28156e-09	TGME49_231170	RecF/RecN/SMC N terminal domain-containing protein
		NCLIV_053750	Smc ABC ATpase, related	-2.0127	0.000235142	TGME49_309400	RecF/RecN/SMC N terminal domain-containing protein
		NCLIV_003550	hypothetical protein	-2.82703	3.24892e-05	TGME49_209140	anti-silencing protein, ASF1 family protein	Highly conserved chaperone of histones H3/H4 that assembles or disassembles chromatin during replication, transcription and repair	English et al., 2006
		NCLIV_045430	putative DNA-binding protein HU	-3.27308	4.5381e-20	TGME49_227970	histone family DNA-binding protein	Histone-like protein with fundamental roles in transcription, replication initiation, and DNA repair. In T. gondii this protein localizes to the apicoplast	Reiff et al., 2012
		NCLIV_063770	hypothetical protein	-2.32172	6.10725e-09	TGME49_247250	RbAp46	Histone chaperone that play key roles in establishing and maintaining chromatin structure.	Murzina et al., 2008
		NCLIV_025100	hypothetical protein	-2.61249	0.0340516	TGME49_262760	poly(ADP-ribose) glycohydrolase	Histone ADP-ribosylation	Dixon et al., 2010
		NCLIV_056840	putative regulator of chromosome condensation domain-containing protein	-2.36647	0.000942523	TGME49_313570	regulator of chromosome condensation (RCC1) repeat-containing protein	Essential nuclear protein that functions as a guanine exchange factor (GEF) for the GTPase Ran to control several cellular processes including nuclear transport	Frankel and Knoll, 2008
		NCLIV_026390	putative centrin	-2.20782	0.000575493	TGME49_260670	centrin, putative	Key roles in cell division, including centrosome duplication	Morrissette, 2015
		NCLIV_025060	conserved hypothetical protein	-2.12353	0.0120364	TGME49_262825	peptidase family c50 protein	Chromatid separation during mitosis	Mottram et al., 2003
	Nc-Spain1H	NCLIV_022940	putative AT hook motif-containing protein	7.22083	0.0382607	TGME49_201820	hypothetical protein	Chromatin remodeling factor by modulating H3 acetylation and methylation	Matsubayashi et al., 2016
		NCLIV_025910	Histone H2A, related	2.66677	0.0407295	TGME49_261250	histone H2A1	Histone protein involved in the structure of chromatin. Probably associated with oxidant DNA damage stress. Higher expression during bradyzoite development reported in T. gondii	Dalmasso et al., 2009
						TGME49_261580	histone H2AX
		NCLIV_001070	histone H2B, related	2.00591	2.06515e-07	TGME49_305160	histone H2Ba
		NCLIV_048010	putative regulator of chromosome condensation domain-containing protein	4.39049	3.37295e-08	TGME49_266040	regulator of chromosome condensation (RCC1) repeat-containing protein	Essential nuclear protein that functions as a guanine exchange factor (GEF) for the GTPase Ran to control several cellular processes including nuclear transport	Frankel and Knoll, 2008
		NCLIV_022830	conserved hypothetical protein	3.28319	0.00234658	TGVEG_202030	poly(ADP-ribose) polymerase catalytic domain protein	Family of enzymes which catalyze the poly(ADP-ribosyl)ation of a limited number of proteins involved in chromatin structure, DNA metabolism and DNA repair	InterPro (IPR012317)
		NCLIV_021800	hypothetical protein	3.58871	2.39531e-16	TGME49_203135	dynein heavy chain family protein	Microtubule-associated proteins. Function as motors either to power axoneme beating or in organelle transport, spindle function, and centrosome assembly in the cytoplasm	Morrisette, 2015
		NCLIV_026260	GA26239, related	7.08054	7.50462e-49	TGME49_261022	dynein heavy chain family protein
		NCLIV_034170	hypothetical protein	4.69527	1.28386e-36	TGME49_243482	dynein heavy chain, putative
						TGME49_273478	dynein heavy chain, n-terminal region 2 protein
		NCLIV_050200	GF18580, related	3.65248	0.0127107	TGME49_235920	dynein, axonemal, heavy chain 2 family protein
		NCLIV_0280	axonemal inner arm I1 intermediate chain dynein IC138	11.93	7.94923e-10	TGME49_258520	WD domain, G-beta repeat-containing protein
		NCLIV_065960	Dynein heavy chain 1, axonemal, related	8.01639	4.26533e-40	TGME49_249840	dynein heavy chain 2, putative
		Cell signaling
	Nc-Spain7	NCLIV_007290	putative protein kinase	-2.23033	1.54949e-09	TGME49_275610	protein kinase, other	Responsible for protein phosphorylation. Protein kinases (PKs) play crucial roles in the proliferation, differentiation, and pathogenesis of T. gondii	Wei et al., 2013
		NCLIV_012270	putative calmodulin	-2.33596	0.0011465	TGME49_220140	EF hand domain-containing protein	Calcium-binding messenger protein. Calcium plays a critical role in several parasite-specific functions including host cell invasion and egress	Krishna et al., 2015
		NCLIV_0153	longevity-assurance (LAG1) domain-containing protein	-2.88524	1.37678e-05	TGME49_283702	FATC domain-containing protein	Lag1p and its homologues likely play a role in ceramide signaling, which affects proliferation, resistance to stress and apoptosis.	Jazwinski and Conzelmann, 2002
		NCLIV_058920	hypothetical protein	-2.85902	0.0001155	TGME49_316450	longevity-assurance protein (LAG1) domain-containing protein
		NCLIV_018180	putative Ras family domain-containing protein	-2.42774	6.63717e-05	TGME49_243450	Ras-related protein Rab2BV, putative	Small GTPase mediated signal transduction	ToxoDB (GO:0007264)
		NCLIV_055220	putative CAMP-dependent protein kinase regulatory subunit	-3.26229	0.0494419	TGME49_311300	cyclic nucleotide-binding domain-containing protein	Protein phosphorylation. Involved in tachyzoite replication	Wei et al., 2013
		NCLIV_056970	conserved hypothetical protein	-2.70092	2.97719e-06	TGME49_313690	Sel1 repeat-containing protein	Involved in the degradation of proteins from the endoplasmatic reticulum. Putative role in signal transduction	Mittl and Schneider-Brachert, 2007
		NCLIV_046425	unspecified product	-2.04729	5.54717e-05	TGME49_226550	TBC domain containing protein	Regulation of GTP-ase activity	ToxoDB (GO:0043087)
	Nc-Spain1H	NCLIV_046430	putative protein kinase	2.48106	9.20478e-27	TGME49_226540	protein kinase	Crucial roles in the proliferation, differentiation, and pathogenesis of T. gondii	Wei et al., 2013
		NCLIV_033570	putative protein kinase (incomplete catalytic triad)	4.02479	0.000910172	TGME49_274170	protein kinase (incomplete catalytic triad)
		NCLIV_004220	unspecified product	3.81041	4.37286e-05	TGME49_209985	cAMP-dependent protein kinase	T. gondii cAMP-dependent protein kinase (PKA) is involved in cell cycle regulation or functions involved in growth, stress response and tachyzoite to bradyzoite conversion.	Wei et al., 2013
		NCLIV_046230	putative cGMP-inhibited 3',5'-cyclic phosphodiesterase	12.0018	6.13575e-92	TGP89_226755B	3'5'-cyclic nucleotide phosphodiesterase domain-containing protein	The cyclic nucleotide phosphodiesterases (PDE) degrade the phosphodiester bond in cAMP and cGMP molecules. Important for signal transduction, likely play an essential role in the regulation of invasion and egress.	InterPro (IPR002073); Howard et al., 2015
		NCLIV_012520	putative 3'5'-cyclic nucleotide phosphodiesterase	2.26613	8.14049e-08	TGME49_220420	3'5'-cyclic nucleotide phosphodiesterase domain-containing protein
		NCLIV_017300	putative 3', 5'-cyclic nucleotide phosphodiesterase	7.49887	5.87328e-45	TGME49_241880	3'5'-cyclic nucleotide phosphodiesterase domain-containing protein
		NCLIV_028010	putative cAMP-specific phosphodiesterase	4.24688	2.36595e-08	TGME49_258508	3'5'-cyclic nucleotide phosphodiesterase domain-containing protein
		NCLIV_030330	putative cAMP-specific phosphodiesterase	2.08481	0.0152483	TGME49_229405	3'5'-cyclic nucleotide phosphodiesterase domain-containing protein
		NCLIV_044990	putative high-affinity cGMP-specific 3',5'-cyclic phosphodiesterase 9A	25.1532	1.22017e-93	TGME49_228500	3'5'-cyclic nucleotide phosphodiesterase domain-containing protein
		NCLIV_020800	cyclic nucleotide-binding domain containing protein	2.05027	7.81563e-05	TGME49_204440	cyclic nucleotide-binding domain-containing protein	Bind cyclic nucleotides (cAMP or cGMP). cAMP- and cGMP-dependent protein kinases (cAPK and cGPK) contain two tandem copies of the cyclic nucleotide-binding domain.	InterPro (IPR000595)
		NCLIV_002740	related to CG16984 protein, related	11.6562	4.42523e-06	TGME49_207790	enkurin, putative	Mitochondrial calcium-signaling protein	Gray and Gubbels, 2015
		Intracellular/transmembrane trafficking
	Nc-Spain7	NCLIV_055730	hypothetical protein	-3.20302	4.9556e-13	TGME49_312110	apicoplast-associated thioredoxin family protein Atrx1	Involved in the control of protein trafficking to the apicoplast	Biddau et al., 2018
		NCLIV_014390	hypothetical protein	-2.0319	4.29333e-05	TGVEG_286050	Tic22-like family protein	Chaperone Required for Protein Import into the Apicoplast	Glaser et al., 2012
		NCLIV_059570	conserved hypothetical protein	-2.14251	0.0349978	TGME49_216710	transporter, major facilitator family protein	Transmembrane transport. MFS proteins selectively transport diverse substrates across membranes	ToxoDB (GO_0055085); Yan, 2013
		NCLIV_006330	hypothetical protein	-2.27127	0.000861805	TGME49_297245	transporter, major facilitator family protein
		NCLIV_003190	putative mitochondrial carrier domain-containing protein	-2.09549	2.45322e-08	TGME49_208560	carrier superfamily protein	Transport of a variety of metabolites, nucleotides and coenzymes across the inner membrane of mitochondria	Palmieri and Pierri., 2010
		NCLIV_064730	hypothetical protein	-2.44066	0.00910072	TGRUB_248550C	SPX domain-containing protein	Domain found in the amino terminus of proteins involved in the regulation of phosphate transport. Many proteins containing SPX domains seem to to be involved in G-protein associated signal transduction	InterPro (IPR004331)
		NCLIV_065150	putative sybindin-like family domain-containing protein	-2.08508	5.42032e-08	TGME49_247648	Sybindin family protein	vesicle-mediated transport (TRAPP complex)	ToxoDB (GO:0016192; GO:0030008)
		NCLIV_045700	putative transmembrane amino acid transporter domain-containing protein	-3.06851	0.000725024	TGME49_227430; TGME49_227570; TGME49_227580	transmembrane amino acid transporter protein	amino acid transmembrane transport	Rajendran et al., 2017
		NCLIV_005950	putative trafficking protein particle complex protein	-2.28276	0.000310571	TGME49_222920	mbp-1 interacting protein-2a family protein	Endoplasmic reticulum to Golgi vesicle-mediated transport	ToxoDB (GO:0006888)
		NCLIV_057620	conserved hypothetical protein	-2.1567	0.000385415	TGME49_314720	Sedlin, N-terminal region protein, putative	Endoplasmic reticulum to Golgi vesicle-mediated transport	ToxoDB (GO:0006888)
		NCLIV_038450	conserved hypothetical protein	-2.55212	3.5434e-05	TGVEG_279340	VMA21-like domain protein	Vacuolar proton-transporting V-type ATPase complex assembly	ToxoDB (GO:0070072)
		NCLIV_012560	putative SNF7 family domain-containing protein	-3.05243	0.0133509	TGME49_220460	SNF7 family protein	Vacuolar transport	ToxoDB (GO:0007034)
		NCLIV_019790	Cation-transporting ATPase, related	-21.4124	6.49944e-28	TGME49_304450	cation-transporting ATPase	Membrane-bound enzyme complexes/ion transporters that use hydrolysis of ATP for the transport of protons across membranes.	InterPro (IPR004014)
		NCLIV_028530	putative phospholipid-transporting P-type ATPase	-6.13716	5.78664e-24	TGME49_257720	proton ATPase, putative	Catalyzes the translocation of phospholipids across membranes	InterPro (IPR026871)
		NCLIV_041450	cDNA FLJ39191 fis, clone OCBBF2004669, highly similar to Homo sapiens ATPase type 13A4 (ATP13A4), mRNA,related	-2.87935	7.8555e-09	TGME49_289070	E1-E2 ATPase subfamily protein	Catalizes the transport across membranes of different compounds, including ions and phospholipids.	InterPro (IPR001757)
		NCLIV_046530	putative reticulon domain-containing protein	-2.44463	3.2874e-14	TGME49_226430	reticulon protein	Reticulons mainly localize to the endoplasmic reticulum. They influence endoplasmic reticulum-Golgi trafficking, vesicle formation and membrane morphogenesis	Yang and Strittmatter, 2007
	Nc-Spain1H	NCLIV_002790	conserved hypothetical protein	2.74329	2.2434e-05	TGME49_207865	GCC2 and GCC3 domain-containing protein	Regulates vesicular transport between the endosomes and the Golgi	InterPro (IPR032023)
		NCLIV_008245	hypothetical protein	3.12059	6.00216e-25	TGME49_253930	GCC2 and GCC3 domain-containing protein
		NCLIV_019610	hypothetical protein	2.79179	1.5931e-24	TGME49_280540	HEAT repeat-containing protein	Arrays of HEAT repeats consists of 3 to 36 units forming a rod-like helical structure which appear to function as protein-protein interaction surfaces. Many HEAT repeat-containing proteins are involved in intracellular transport.	InterPro (IPR000357)
		NCLIV_019730	conserved hypothetical protein	8.54296	4.56598e-133	TGME49_280420	HEAT repeat-containing protein
		NCLIV_038021	unspecified product	3.97964	3.57051e-07	TGME49_268020	transporter, major facilitator family protein	Transmembrane transport. MFS proteins selectively transport diverse substrates across membranes	Yan et al., 2013
		NCLIV_044060	hypothetical protein	2.55802	3.77232e-35	TGME49_305590	ABC transporter transmembrane region domain-containing protein	Transmembrane transport	Sauvage et al., 2006
		NCLIV_065220	putative ABC transporter	2.34359	0.0229587	TGME49_247540	ATP-binding cassette G family transporter ABCG107	It has been suggested a role for T. gondii ABCG107 in lipid movement inside the parasitophorous vacuole.	Ehreman et al., 2010
		Energy and metabolism
		Carbohydrate and energy metabolism
	Nc-Spain7	NCLIV_005420	phosphoglycerate kinase, related	-7.95341	7.00698e-13	TGME49_222020	phosphoglycerate kinase PGKII	Glycolysis	Shanmugasundram et al., 2013
		NCLIV_037190	putative glyceraldehyde-3-phosphate dehydrogenase	-2.24817	1.68361e-17	TGME49_269190	glyceraldehyde-3-phosphate dehydrogenase GAPDH2
		NCLIV_033270	hypothetical protein	-2.44309	2.01912e-07	TGME49_233500	triose-phosphate isomerase TPI-II
		NCLIV_009420	putative pyruvate kinase	-2.42505	0.0117575	TGME49_299070	pyruvate kinase PyKII	Pyruvate metabolism	Shanmugasundram et al., 2013
		NCLIV_062940	putative pyruvate dehydrogenase	-3.52961	6.60665e-14	TGME49_245670	pyruvate dehydrogenase complex subunit PDH-E1Alpha	Pyruvate metabolism, thiamine salvage	Shanmugasundram et al., 2013
		NCLIV_0145803	Hypothetical protein, related	-49.7101	6.17139e-05	TGME49_2084201	Sodium:neurotransmitter symporter family protein	Glutamine Utilization and GABA Shunt	Shanmugasundram et al., 2013
		NCLIV_046950	UDP-glucose 4-epimerase, related	-2.45932	1.80284e-07	TGME49_225880	UDP-glucose 4-epimerase	Starch and galactose metabolism	Shanmugasundram et al., 2013
		NCLIV_030570	hypothetical protein	-5.30537	3.83936e-08	TGME49_229780	GHMP kinase, N-terminal domain-containing protein
		NCLIV_054680	conserved hypothetical protein	-2.21213	0.000418933	TGME49_310620	starch binding domain-containing protein	Starch metabolism	Uboldi et al., 2015
		NCLIV_010760	hypothetical protein	-3.5748	6.57831e-15	TGVEG_319308	putative adenylate kinase	Energy homeostasis	InterPro (IPR033690)
	Nc-Spain1H	NCLIV_000780	Carboxyvinyl-carboxyphosphonate phosphorylmutase protein, related	2.84447	7.5596e-13	TGME49_293810	carboxyvinyl-carboxyphosphonate phosphorylmutase	2-Methylcitrate cycle	Shanmugasundram et al., 2013
		NCLIV_052500	hypothetical protein	2.42132	2.53784e-06	TGME49_215590	flavoprotein subunit of succinate dehydrogenase	Tricarboxylic acid (TCA) cycle, electron transport chain	Shanmugasundram et al., 2013
		NCLIV_035930	hypothetical protein	3.72896	0.0188883	TGME49_270850	glycosyl hydrolases family 17 protein
		NCLIV_002700	conserved hypothetical protein	2.63881	0.0154207	TGVEG_207750	glycosyltransferase family 17 protein	Glycosyltransferases catalyse the transfer of a sugar moiety from an activated sugar donor onto saccharide or non-saccharide acceptors	Coutinho et al., 2003
		Aminoacids metabolism
	Nc-Spain7	NCLIV_0245	NAD binding domain of 6-phosphogluconate dehydrogenase	-4.0395	4.78883e-06	TGME49_263430	3-hydroxyisobutyrate dehydrogenase	Leucine, isoleucine and valine metabolism.	Shanmugasundram et al., 2013
		NCLIV_012460	Lysyl-tRNA synthetase, related	-3.48435	1.19495e-11	TGME49_220340	hypothetical protein	Lysine biosynthesis	Shanmugasundram et al., 2013
						TGME49_220350	tRNA ligases class II (D, K and N) domain-containing protein	Lysine degradation	Shanmugasundram et al., 2013
		NCLIV_018380	putative dihydrodipicolinate reductase	-2.46472	4.91302e-05	TGME49_243680	dihydrodipicolinate reductase	Lysine biosynthesis	Shanmugasundram et al., 2013
		NCLIV_0696503	Phenylalanine-4-hydroxylase, related	-4.7074	0.0395308	-		Phenylalanine and tyrosine metabolism	Shanmugasundram et al., 2013
		NCLIV_053050	putative indole-3-glycerol phosphate synthase domain containing protein	-2.82656	3.88506e-09	TGME49_207180	indole-3-glycerol phosphate synthase domain-containing protein	Tryptophan metabolism	InterPro (IPR013798)
	Nc-Spain1H	NCLIV_004630	putative threonine synthase	5.7715	8.51133e-31	TGME49_220840	threonine synthase	Threonine metabolism	Shanmugasundram et al., 2013
		NCLIV_067100	Cysteine synthase, related	2.27948	0.00797428	TGME49_278910	O-acetylserine (thiol) lyase 2, putative	Glycine, serine and cysteine metabolism	Shanmugasundram et al., 2013
		Lipids and Glycan metabolism
	Nc-Spain7	NCLIV_000530	3-oxoacyl-(Acyl-carrier-protein) synthase II,related	-3.2128	1.26621e-17	TGME49_293590	3-oxoacyl-acyl-carrier protein synthase I/II, putative	Fatty acid biosynthesis in the apicoplast (FAS II system)	Shanmugasundram et al., 2013
		NCLIV_066970	putative enoyl-acyl carrier reductase	-4.02837	5.18878e-25	TGME49_251930	enoyl-acyl carrier reductase ENR
		NCLIV_0319	3-oxoacyl-(acyl-carrier-protein) synthase III family protein	-2.68277	9.7493e-07	TGME49_231890	beta-ketoacyl-acyl carrier protein synthase III, putative
		NCLIV_004340	hypothetical protein	-4.42184	5.09911e-17	TGME49_321570	beta-hydroxyacyl-acyl carrier protein dehydratase (FABZ)
		NCLIV_062520	3-ketoacyl-(Acyl-carrier-protein) reductase, related	-6.03254	9.12522e-27	TGME49_217740	3-ketoacyl-(acyl-carrier-protein) reductase
		NCLIV_023990	Acyl carrier protein, related	-2.28546	5.72925e-13	TGME49_264080	acyl carrier protein ACP	Fatty acid biosynthesis in the apicoplast (FAS II system); Pantothenate and CoA biosynthesis	Shanmugasundram et al., 2013
		NCLIV_035870	putative glycerol-3-phosphate acyltransferase	-2.66538	1.18002e-06	TGME49_270910	acyltransferase domain-containing protein	Fatty acid biosynthesis in the apicoplast (FAS II system); Recycling of phospholipids; Phosphatidylethanolamine and phosphatidylserine metabolism	Shanmugasundram et al., 2013
		NCLIV_035250	GK18150, related	-2.20652	9.49094e-06	TGME49_271888	3-ketoacyl-CoA reductase, putative	Fatty acid elongation via elongase pathway of ER	Shanmugasundram et al., 2013
		NCLIV_015250	hypothetical protein	-2.08033	0.00119938	TGME49_256830	SacI domain-containing protein	Inositol phosphate metabolism	Shanmugasundram et al., 2013
		NCLIV_045290	cDNA FLJ30053 fis, clone ADRGL1000144, highly similar to StAR-related lipid transfer protein 7, related	-2.51458	2.36807e-09	TGVEG_228130	START domain protein	START domain-containing proteins (START proteins) play important functions in eukaryotic cells, including the redistribution of phospholipids to subcellular compartments and delivering sterols to the mitochondrion for steroid synthesis	Hill et al., 2016
		NCLIV_057630	putative dolichyl pyrophosphate Glc1Man9GlcNAc2 alpha-1,3-glucosyltransferase	-2.41391	1.25056e-06	TGME49_314730	ALG6, ALG8 glycosyltransferase family protein	N-Glycan biosynthesis	Shanmugasundram et al., 2013
		NCLIV_004260	hypothetical protein	-3.92949	6.18928e-09	TGME49_321660	mannosyltransferase, putative	Glycosylphosphatidylinositol (GPI) anchor biosynthesis; N-Glycan biosynthesis	Shanmugasundram et al., 2013
		NCLIV_028260	hypothetical protein	-5.13485	4.63085e-07	TGME49_258110	N-acetylglucosaminyl phosphatidylinositol deacetylase	Glycosylphosphatidylinositol (GPI) anchor biosynthesis	Shanmugasundram et al., 2013
		NCLIV_054430	conserved hypothetical protein	-2.01046	0.000244039	TGME49_310350	PGAP1 family protein	GPI anchor metabolic process	ToxoDB (GO:0006505)
		NCLIV_033980	conserved hypothetical protein	-2.00797	0.000689861	TGME49_273730	phospholipase, patatin family protein	Lipid metabolism and immune regulation during host infection	Wilson et al., 2017
		NCLIV_016930	hypothetical protein	-3.11123	0.00378819	TGME49_240770	cytochrome b5 family heme/steroid binding domain-containing protein	Fatty acid biosynthetic process; oxidation-reduction process	ToxoDB (GO:0006633; GO:0055114)
	Nc-Spain1H	NCLIV_001340	putative oxysterol-binding protein domain-containing protein	4.61649	2.51578e-06	TGME49_294320	Oxysterol-binding protein	Lipid trafficking and metabolism	Zeng and Zhu., 2006
		NCLIV_021430	hypothetical protein	9.32419	1.47277e-07	TGME49_203580	NAD-binding domain 4 domain-containing protein	Fatty acid elongation via elongase pathway of ER	Shanmugasundram et al., 2013
		NCLIV_050890	putative KR domain domain-containing protein	3.15147	0.0100459	TGME49_236980	AMP-binding enzyme domain-containing protein	Fatty acid elongation in the cytosol (FAS I system)	Shanmugasundram et al., 2013
		NCLIV_013310	hypothetical protein	2.23433	0.00333981	TGME49_213340	GMC oxidoreductase	Phosphatidylcholine metabolism	Shanmugasundram et al., 2013
		NCLIV_057150	hypothetical protein	8.35673	0.00164148	TGME49_313950	GMC oxidoreductase
		NCLIV_064160	conserved hypothetical protein	2.13517	0.0284108	TGVEG_248170	peroxisomal membrane anchor	Peroxisome biosynthesis and integrity. Peroxisomes are organelles involved in fatty acid degradation and cellular detoxification.	Moog et al., 2017
		NCLIV_028730	putative peroxisomal-type ATPase	2.48652	0.022724	TGME49_255210	ATPase, AAA family protein
		NCLIV_053410	putative peroxisome biogenesis factor 1	6.83102	2.21592e-08	TGME49_308960	ATPase, AAA family protein
						TGME49_236990	beta-ketoacyl synthase, N-terminal domain-containing protein	Fatty acid elongation in the cytosol (FAS I system)	Shanmugasundram et al., 2013
		Vitamins, cofactors and other substrates metabolism
	Nc-Spain7	NCLIV_023120	Chorismate synthase, related	-2.67296	1.6543e-11	TGME49_201380	chorismate synthase, putative	Shikimate biosynthesis	Shanmugasundram et al., 2013
		NCLIV_004820	phospho-2-dehydro-3-deoxyheptonate aldolase,related	-2.48271	2.27678e-10	TGVEG_221250	phospho-2-dehydro-3-deoxyheptonate aldolase	Shikimate biosynthesis; Ubiquinone metabolism	InterPro (IPR006268)
		NCLIV_002980	putative 5-formyltetrahydrofolate cyclo-ligase domain-containing protein	-2.16924	0.0221321	TGME49_208090	5-formyltetrahydrofolate cyclo-ligase	Folate metabolism	Ulland et al., 2013
		NCLIV_0146303	Novel protein similar to quinoid dihydropteridine reductase (QDPR, zgc:112405), related	-7.90474	0.00051074	TGME49_285750	6,7-dihydropteridine reductase	Folate biosynthesis	Shanmugasundram et al., 2013
		NCLIV_051000	Ethylene-inducible protein hever, related	-2.26456	0.0464966	TGME49_237140	ethylene inducible protein, putative	Pyridoxal phosphate (Vitamin B6) metabolism	Shanmugasundram et al., 2013
		NCLIV_032510	FAD binding domain containing protein, related	-2.14352	0.000341097	TGME49_232540	FAD binding domain-containing protein	Ubiquinone metabolism	Shanmugasundram et al., 2013
0		NCLIV_008230	delta-aminolevulinic acid dehydratase, related	-3.12162	2.90195e-10	TGME49_253900	parasite porphobilinogen synthase PBGS	Porphyrin metabolism	Shanmugasundram et al., 2013; Dhanasekaran Shanmugam et al., 2010	The differences in structure, localisation and metal dependence to human enzyme in addition to the fact that the treatment with succinylacetone kills T. gondii suggests it as a good drug target although it is challenging to design small molecule inhibitors which selectively target parasite enzyme active sites and not those of host
	Nc-Spain1H	NCLIV_000440	Molybdopterin biosynthesis protein, related	2.03973	1.37315e-06	TGME49_293480	MoeA N-terminal region (domain I and II) domain-containing protein	Folate biosynthesis	Shanmugasundram et al., 2013
		Redox metabolism
	Nc-Spain7	NCLIV_045930	putative glutaredoxin	-4.10272	0.0010456	TGVEG_227100	putative glutaredoxin	Redox metabolism	Shanmugasundram et al., 2013
		NCLIV_063860	putative thioredoxin	-2.52281	1.78304e-25	TGME49_247350	thioredoxin domain-containing protein
		NCLIV_014020	Peroxiredoxin-2E-1, related	-6.05971	2.82688e-33	TGME49_286630	redoxin domain-containing protein
		NCLIV_015430	hypothetical protein	-2.94085	2.49657e-16	TGME49_238040	protein disulfide-isomerase domain-containing protein	Redox homeostasis	ToxoDB
	Nc-Spain1H	NCLIV_007660	hypothetical protein	2.15104	0.0155698	TGP89_253120A	mandelonitrile lyase, putative	Oxidation-reduction process	ToxoDB (GO:0055114)
		NCLIV_007690	putative oxidoreductase	7.19554	0.0383366	TGME49_253150	hypothetical protein
		NCLIV_027380	putative 2OG-Fe(II) oxygenase family oxidoreductase	7.82705	4.59543e-83	TGME49_259150	hypothetical protein	Oxidation-reduction process	InterPro (I7MKU4)
		Others
	Nc-Spain7	NCLIV_026210	hypothetical protein	-8.87394	3.72713e-18	TGME49_261070	apicoplast triosephosphate translocator APT1	Pyruvate metabolism, Isoprenoids metabolism, Fatty acid biosynthesis in the apicoplast (FAS II system)	Shanmugasundram et al., 2013, Brooks et al., 2010
		NCLIV_0428403	hypothetical protein	-6.3662	0.00388831	TGME49_290970	8-amino-7-oxononanoate synthase	Sphingomyelin and ceramide metabolism, Pyridoxal phosphate (Vitamin B6) metabolism	Shanmugasundram et al., 2013
						TGME49_290980	glycine C-acetyltransferase, putative
		NCLIV_042850	pyridoxal phosphate-dependent acyltransferase, related	-2.24061	9.65029e-08	TGME49_290970	8-amino-7-oxononanoate synthase
						TGME49_290980	glycine C-acetyltransferase, putative
		NCLIV_039650	genome sequencing data, contig C317, related	-2.16885	0.0184508	TGME49_265860	hydrolase, carbon-nitrogen family protein	Nitrogen compound metabolic process	InterPro (IPR003010)
		NCLIV_031690	Oligosaccharyl transferase-like protein, related	-2.06362	1.53788e-08	TGME49_231430	oligosaccharyl transferase stt3 protein, putative	Aminosugars metabolism; N-Glycan biosynthesis	Shanmugasundram et al., 2013
		NCLIV_006990	conserved hypothetical protein	-2.03586	0.000362776	TGVEG_276155	AMP-binding enzyme	The family of enzymes includes long chain fatty acid Co-A ligase, acetyl-CoA synthetase and various other closely-related synthetases	InterPro (IPR020459)
	Nc-Spain1H	NCLIV_022740	putative enoyl-CoA hydratase/isomerase family protein	2.7596	0.000470754	TGME49_202140	enoyl-CoA hydratase/isomerase family protein	Leucine, isoleucine and valine metabolism; Fatty acid recycling and degradation	Shanmugasundram et al., 2013
		NCLIV_043550	glycerol-3-phosphate dehydrogenase, related	5.39648	6.04383e-09	TGME49_210260	NAD-dependent glycerol-3-phosphate dehydrogenase	Fatty acid biosynthesis in the apicoplast (FAS II system); Glycolysis; Electron transport chain	Shanmugasundram et al., 2013
		NCLIV_001470	putative rhodanese-like domain containing protein	3.8405	1.23923e-21	TGME49_294570	rhodanese family domain-containing protein	Cyanide detoxification; Sulfur and selenium metabolism; Biosynthesis of prosthetic groups in iron-sulfur proteins.	Cipollone et al, 2007
		Immune related
	Nc-Spain7	NCLIV_0051603	putative ppg3	-15.8691	0.047654	TGVEG_221630	putative ppg3	Cellular surface coat molecules	Favila et al., 2015
		NCLIV_020320	Proteophosphoglycan ppg4, related	-2.31089	0.00854753	TGVEG_205370	putative proteophosphoglycan protein ppg4
		NCLIV_065610	Proteophosphoglycan 5, related	-2.74226	1.35694e-09	TGVEG_249440	putative proteophosphoglycan 5, related protein
		NCLIV_015405	putative cyclophilin	-2.2315	3.13693e-06	TGME49_238000	peptidyl-prolyl isomerase	N. caninum antigen related with interferon production and CC-chemokine receptor 5-dependent cell migration	Mineo et al., 2010
		NCLIV_054410	Calr protein, related	-2.14572	0.000197101	TGME49_310320	calreticulin family protein	Protein folding. Putative role in immune evasion	ToxoDB (GO:0006457); Castillo et al., 2014
		NCLIV_042400	macrophage migration inhibitory factor, related	-2.83725	1.0808e-10	TGME49_290040	macrophage migration inhibitory factor, putative	Immunomodulatory activity and parasite dissemination	Sommerville et al., 2013
	Nc-Spain1H	NCLIV_004020	tryptophan-rich antigen (Pv-fam-a), related	3.09187	0.00900956	TGVEG_209755	putative tryptophan-rich antigen, related protein	Candidate antigens for potential vaccines in Plasmodium vivax	Wang et al., 2015
		NCLIV_056990	Proteophosphoglycan 5, related	2.36381	0.00569206	TGVEG_313725	proteophosphoglycan 5, related protein	Cellular surface coat molecules	Favila et al., 2015
		Adhesion/invasion/survival
		Cell adhesion and invasion
	Nc-Spain7	NCLIV_0044323	srs domain-containing protein	-37.1247	0.000699733	TGME49_321470	SAG-related sequence SRS12D	Surface antigen	Piraine et al., 2015
						TGME49_321490	SAG-related sequence SRS12A
		NCLIV_0236203	SRS domain-containing protein	-15.2239	1.59565e-07	TGME49_281930	SAG-related sequence SRS39
		NCLIV_027700	SRS domain-containing protein	-2.31269	1.81927e-10	TGME49_258810	SAG-related sequence SRS27B
		NCLIV_056530	conserved hypothetical protein	-2.12465	0.00699374	TGME49_313200	LRR-containing protein	Proteins containing LRRs include tyrosine kinase receptors, cell adhesion molecules, extracellular matrix binding glycoproteins and virulence factors.	InterPro (IPR001611)
		NCLIV_003470	putative thrombospondin type 1 domain-containing protein	-2.61715	2.17756e-07	TGME49_209060	thrombospondin type 1 domain-containing protein	Genes containing TSP1 domains have been identified in several genera of apicomplexans, including thrombospondin-related adhesive proteins (TRAPs)key molecules of glideosome.	Boucher and Bosch, 2015
		NCLIV_024420	hypothetical protein	-2.03343	1.55142e-13	TGME49_263520	microtubule associated protein SPM1	Stabilizes Subpellicular Microtubules in T. gondii. Loss of SPM1 decreases parasite fitness	Tran et al., 2012
		NCLIV_037160	putative actin-like family protein	-3.3725	7.17359e-05	TGME49_269240	actin-like family protein	May be implicated in actin-based gliding motility	Boucher and Bosch, 2015; Gordon and Sibley, 2005
	Nc-Spain1H	NCLIV_002220	srs domain-containing protein	2.42615	0.0175429	TGME49_295600	SAG-related sequence SRS10	Surface antigen	Piraine et al., 2015
		NCLIV_004471	srs domain-containing protein	4.40187	1.35119e-16	TGME49_321470	SAG-related sequence SRS12D
						TGME49_321490	SAG-related sequence SRS12A
		NCLIV_010040	srs domain-containing protein	5.96056	0.00549047	TGVEG_320230	SAG-related sequence SRS15C
		NCLIV_058060	SRS domain-containing protein	2.92161	3.76131e-07	TGME49_315320	SAG-related sequence SRS52A
		NCLIV_034381	SRS domain-containing protein	2.37418	0.0175429	TGME49_273110	SAG-related sequence SRS30D
						TGME49_273120	SAG-related sequence SRS30C
		NCLIV_0389302	srs domain-containing protein	211.829	1.04089e-23	TGME49_267130	SAG-related sequence SRS38A
						TGME49_267140	SAG-related sequence SRS38B
						TGME49_267150	SAG-related sequence SRS38C
						TGME49_267160	SAG-related sequence SRS38D
		NCLIV_0434302	srs domain-containing protein	15.3528	0.0249995	TGVEG_440320	SAG-related sequence SRS36C
		NCLIV_0479402	SRS domain-containing protein	25.9212	0.00175199	TGME49_224790	SAG-related sequence SRS40A
		NCLIV_049510	SRS domain-containing protein	7.17783	0.0388461	TGME49_234370	SAG-related sequence SRS42
		NCLIV_049630	SRS domain-containing protein	3.49747	6.19946e-12	TGME49_234930	SAG-related sequence SRS43
		NCLIV_052740	SRS domain-containing protein	2.22558	0.00177423	-
		NCLIV_068872	SRS domain-containing protein	2.49098	3.93138e-08	-
		NCLIV_019580	SRS domain-containing protein	14.1013	7.17876e-41	TGME49_280570	SAG-related sequence SRS35A	Bradyzoite-specific surface protein (SAG4)	Fernández-García et al., 2006
		NCLIV_010030	Bradyzoite surface protein BSR4	4.19573	8.59258e-05	TGME49_320230	SAG-related sequence SRS15C	Bradyzoite-specific surface protein	Risco-Castillo et al., 2007
		NCLIV_020010	putative F5/8 type C domain-containing protein	2.52472	3.31243e-07	TGME49_205658	F5/8 type C domain-containing protein	Cell adhesion	ToxoDB (GO:0007155)
						TGME49_205662	LCCL domain-containing protein
		NCLIV_011720	hypothetical protein	3.15903	9.8365e-07	TGME49_211270	sushi domain (scr repeat) domain-containing protein	Cell diferentiation; Domain found in many complement and adhesion proteins	ToxoDB (GO:0030154); Lamarque et al., 2012
		NCLIV_026560	Cell wall surface anchor family protein, related	2.46954	0.00234673	TGME49_260480	leucine rich repeat-containing protein	Proteins containing LRRs include tyrosine kinase receptors, cell adhesion molecules, extracellular matrix binding glycoproteins and virulence factors.	InterPro (IPR001611)
		NCLIV_066090	putative leucine rich repeat protein	2.74805	4.65762e-09	TGME49_249980	leucine rich repeat-containing protein
		NCLIV_036660	conserved hypothetical protein	2.19271	6.3767e-05	TGME49_269930	calcium binding egf domain-containing protein	Several parasite proteins containing EGF or TSR-like domains have adhesive properties. Hypothetical proteins containing these domains are likely involved in invasion. EGF-containing MICs activate Akt signaling via EGF receptors to avoid autophagic killing of the parasite by the host cell	Huynh et al., 2014
		NCLIV_011000	fibrillin 1, related	2.19572	0.0180233	TGME49_318540	calcium binding egf domain-containing protein
		NCLIV_001350	putative EGF-like domain-containing protein	3.54892	0.00204098	TGME49_294330	EGF family domain-containing protein	Apical membrane antigen (AMA) 4	Lamarque et al., 2014
		NCLIV_0384902	conserved hypothetical protein	62.511	2.69569e-07	TGME49_267875	NBP2b protein, putative	Cell binding	Meyer et al., 2010; Boucher et al., 2015
		NCLIV_024520	hypothetical protein	2.45947	0.00619059	TGME49_263410	scavenger receptor cysteine-rich domain-containing protein	Domain found in cell-surface and secreted proteins. They likely mediate protein-protein interactions and ligand binding	(IPR001190)
		NCLIV_053260	putative platelet binding protein GspB	3.63339	6.10602e-09	TGME49_306890	hypothetical protein
		NCLIV_064920	conserved hypothetical protein	2.73416	3.28577e-13	TGME49_248780	SRR1 protein
		NCLIV_069310	unspecified product	10.9767	1.91457e-85	TGME49_267680	microneme protein MIC12	Microneme protein	Piraine et al., 2015
		NCLIV_061910	hypothetical protein	4.69204	1.0218e-08	TGME49_218310	microneme protein MIC14
		NCLIV_020210	conserved hypothetical protein	2.06831	9.50888e-05	TGME49_205480	IMC subcompartment protein ISP4	Protein of the inner membrane complex (IMC), used by apicomplexan parasites to facilitate host cell invasion and replication.	Fung et al., 2012
		Rhoptry proteins
	Nc-Spain7	NCLIV_007770	putative Rhoptry kinase family protein, truncated (incomplete catalytic triad)	-4.74988	4.62824e-104	TGME49_253330	Rhoptry kinase family protein, truncated (incomplete catalytic triad)	Rhoptry protein	Piraine et al., 2015
		NCLIV_068850	unspecified product	-2.47289	1.62596e-35	TGME49_2523601	rhoptry kinase family protein ROP24 (incomplete catalytic triad)
	Nc-Spain1H	NCLIV_001400	unspecified product	3.28167	6.5759e-41	TGME49_294400	hypotetical protein	Rhoptry protein RON2L1. RON2L1 interacts in a selective and exclusive manner with AMA4 to assist invasion in Toxoplasma.	Lamarque et al., 2014
		NCLIV_068890	unspecified product	2.14439	2.71432e-05	TGVEG_442710	rhoptry kinase family protein	Rhoptry protein	Piraine et al., 2015
		NCLIV_017420	unspecified product	2.04344	6.10069e-06	TGME49_242110	rhoptry kinase family protein ROP38
						TGME49_242118	myosin-light-chain kinase
						TGME49_242230	rhoptry kinase family protein ROP29
						TGME49_242240	rhoptry kinase family protein ROP19A
						TGME49_242250	rhoptry kinase family protein ROP19B
		NCLIV_001950	unspecified product	2.21871	4.86099e-07	TGME49_295105	rhoptry protein, putative
						TGME49_295110	rhoptry protein ROP7
						TGME49_295125	rhoptry protein ROP4
		Parasite survival
	Nc-Spain1H	NCLIV_062190	GK22245, related	3.46795	4.17246e-20	TGME49_217430	protease inhibitor PI1	Protection of parasites from proteolytic damage in the gut, suppression of proteolytic activity during parasite replication, and counteraction of host proteases of the innate immune system	Pszenny et al., 2012
						TGME49_246130	serpin (serine proteinase inhibitor) superfamily protein
		NCLIV_056890	hypothetical protein	2.36132	8.24804e-10	-		NcPI-S. Serine-protease inhibitor	Morris et al., 2004
		NCLIV_003900	putative oocyst wall protein COWP	2.17784	0.000208433	TGME49_209610	oocyst wall protein OWP2	Cyst wall protein	Sullivan and Jeffers, 2012
		NCLIV_005970	putative oocyst wall protein	2.31135	6.51047e-23	TGME49_222940	hypothetical protein
		Transmembrane proteins
	Nc-Spain7	NCLIV_000900	conserved hypothetical protein	-3.05936	3.92365e-06	TGVEG_294050	putative transmembrane protein
		NCLIV_005700	conserved hypothetical protein	-2.58646	6.73027e-05	TGVEG_222300	putative transmembrane protein
		NCLIV_005740	conserved hypothetical protein	-2.05709	8.16934e-07	TGMAS_222350B	putative transmembrane protein
		NCLIV_005790	conserved hypothetical protein	-2.38791	0.00264434	TGVEG_222400	putative transmembrane protein
		NCLIV_0071703	conserved hypothetical protein	-18.0166	0.0310274	TGVEG_275760	putative transmembrane protein
		NCLIV_0077403	hypothetical protein	-17.9167	0.0318288	TGVEG_253300	putative transmembrane protein
		NCLIV_010530	conserved hypothetical protein	-2.18803	5.07998e-05	TGVEG_319630	putative transmembrane protein
		NCLIV_010990	conserved hypothetical protein	-2.48731	0.0449083	TGVEG_318550	putative transmembrane protein
		NCLIV_016780	conserved hypothetical protein	-4.26716	0.000893374	TGVEG_240580	putative transmembrane protein
		NCLIV_024790	conserved hypothetical protein	-3.10562	0.00647101	TGVEG_263120	putative transmembrane protein
		NCLIV_044100	conserved hypothetical protein	-2.09271	0.000138285	TGVEG_206320	putative transmembrane protein
		NCLIV_047210	conserved hypothetical protein	-3.7792	3.78254e-08	TGVEG_225500	putative transmembrane protein
		NCLIV_048050	conserved hypothetical protein	-2.00465	0.000789571	TGVEG_266090	putative transmembrane protein
		NCLIV_048150	conserved hypothetical protein	-2.14489	0.00019805	TGVEG_224570	putative transmembrane protein
		NCLIV_056010	conserved hypothetical protein	-2.25195	0.0301593	TGVEG_312470	putative transmembrane protein
		NCLIV_063790	hypothetical protein	-2.47041	8.49023e-05	TGVEG_247280	putative transmembrane protein
		NCLIV_066620	conserved hypothetical protein	-3.21845	1.09535e-05	TGVEG_251520	putative transmembrane protein
		NCLIV_009390	putative Cleft lip and palate transmembrane protein 1	-2.16962	8.03702e-09	TGME49_299110	cleft lip and palate transmembrane protein 1 (clptm1) protein
	Nc-Spain1H	NCLIV_000990	conserved hypothetical protein	2.58011	0.00647101	TGVEG_294240	putative transmembrane protein
		NCLIV_012450	conserved hypothetical protein	2.31064	2.34808e-12	TGVEG_220330	putative transmembrane protein
		NCLIV_013240	conserved hypothetical protein	2.64927	1.45908e-08	TGVEG_213240	putative transmembrane protein
		NCLIV_014420	conserved hypothetical protein	3.47244	3.45496e-05	TGVEG_286010	putative transmembrane protein
		NCLIV_018840	conserved hypothetical protein	3.68745	2.57915e-28	TGVEG_244260	putative transmembrane protein
		NCLIV_0192602	hypothetical protein	15.3025	0.0251662	TGVEG_244715	putative transmembrane protein
		NCLIV_021160	conserved hypothetical protein	4.63821	0.0136855	TGVEG_203930	putative transmembrane protein
		NCLIV_023530	conserved hypothetical protein	4.5958	0.00127275	TGVEG_281590	putative transmembrane protein
		NCLIV_027630	conserved hypothetical protein	4.40874	1.25095e-15	TGVEG_258840	putative transmembrane protein
		NCLIV_038440	conserved hypothetical protein	8.48108	7.49191e-101	TGVEG_279350	putative transmembrane protein
		NCLIV_039840	conserved hypothetical protein	5.01832	0.00264887	TGVEG_265430	putative transmembrane protein
		NCLIV_043290	conserved hypothetical protein	3.03508	0.038283	TGVEG_291910	putative transmembrane protein
		NCLIV_062130	conserved hypothetical protein	10.657	0.00366614	TGVEG_217370	putative transmembrane protein
		NCLIV_062170	conserved hypothetical protein	11.4067	2.45349e-20	TGVEG_217410	putative transmembrane protein
		NCLIV_049360	conserved hypothetical protein	2.53267	4.5783e-05	TGVEG_211860	putative transmembrane protein
		NCLIV_051320	conserved hypothetical protein	3.52275	7.4586e-45	TGVEG_237585	putative transmembrane protein
		NCLIV_059880	conserved hypothetical protein	2.9543	0.000315926	TGVEG_216335	putative transmembrane protein
		NCLIV_064070	conserved hypothetical protein	5.82923	6.6181e-10	TGVEG_247970	putative transmembrane protein
		NCLIV_002730	conserved hypothetical protein	10.7044	0.000555702	TGVEG_207780	putative transmembrane protein
		NCLIV_064130	conserved hypothetical protein	2.32573	1.25056e-06	TGVEG_248140	putative transmembrane protein
		NCLIV_069520	hypothetical protein	4.12922	1.50555e-13	TGRUB_213460	putative transmembrane protein
		NCLIV_069530	hypothetical protein	3.02003	0.00111392	TGRUB_213460	putative transmembrane protein
		NCLIV_003880	conserved hypothetical protein	3.39012	0.0409699	TGVEG_209590	putative transmembrane protein
		Others
	Nc-Spain7	NCLIV_005130	conserved hypothetical protein	-2.30912	0.00823588	TGVEG_221600	oligomerisation domain protein
		NCLIV_052780	putative penicillin amidase domain-containing protein	-2.87212	1.06988e-31	TGME49_275320	penicillin amidase
		NCLIV_025050	SPRY domain-containing protein, related	-2.24498	0.0113841	TGME49_262850	hypothetical protein	Unknown	InterPro (IPR003877)
		NCLIV_016000	conserved hypothetical protein	-2.06208	0.00103598	TGVEG_239340	GTP1/Obg protein	GTP-binding protein. Uncertain function, but it has been shown to be important in development and normal cell metabolism	InterPro (IPR036726)
		NCLIV_032060	putative peptidase family T4	-3.81902	7.19471e-07	TGME49_232060	hypothetical protein
		NCLIV_018460	conserved hypothetical protein	-2.28955	0.000381667	TGVEG_243760	TLC domain protein	Protein domain with at least 5 transmembrane alpha-helices. Proteins containing this domain may possess diverse functions such as lipid trafficking, sensing or metabolism.	InterPro (IPR006634)
		NCLIV_019620	conserved hypothetical protein	-2.15392	0.0426856	TGVEG_280530	DTW domain protein	Unknown	InterPro (IPR005636)
		NCLIV_005330	at4g25910 protein, related	-2.20847	0.000410579	TGME49_221922	NifU family domain-containing protein	Iron-sulfur cluster assembly	ToxoDB (GO:0016226)
		NCLIV_0155	alpha/beta hydrolase fold domain containing protein	-2.99726	1.26289e-09	TGME49_238200	alpha/beta hydrolase fold domain-containing protein	Hydrolytic enzymes of widely differing catalytic function	InterPro (IPR029058)
		NCLIV_053980	conserved hypothetical protein	-3.9174	6.90979e-06	TGVEG_309860	alpha/beta hydrolase family protein
		NCLIV_0534803	Large protein with signal peptide. cysteine-rich,threonine-rich, possible mucin, related	-4.5257	0.0427499	TGME49_309030	hypothetical protein
		NCLIV_061740	Hydrolase, alpha/beta fold family, related	-4.3072	0.000547279	TGME49_218540	peptidase S15, putative	Proteolytic enzime	InterPro (IPR008252)
		NCLIV_015810	putative retinitis pigmentosa GTPase regulator	-2.30459	0.0448518	TGME49_238980	hypothetical protein
		NCLIV_012730	Os10g0412100 protein, related	-2.68302	0.0274953	TGME49_301216	endonuclease/exonuclease/phosphatase family protein	It includes magnesium dependent endonucleases and phosphatases involved in intracellular signalling, AP endonuclease proteins, DNase I proteins, Synaptojanin an inositol-1,4,5-trisphosphate phosphatase and Sphingomyelinase	InterPro (IPR005135)
		NCLIV_052110	conserved hypothetical protein	-4.69195	4.10919e-06	TGME49_215100	PP-loop family protein	The PP-loop motif appears to be a modified version of the P-loop of nucleotide binding domain involved in phosphate binding	InterPro (IPR012122)
	Nc-Spain1H	NCLIV_012440	conserved hypothetical protein	2.16296	3.37882e-11	TGME49_220320	BSD domain-containing protein	Unknown function. Domain present in basal transcription factors, synapse-associated proteins and several hypothetical proteins.	InterPro (IPR005607)
		NCLIV_014810	putative Patched family domain containing protein	2.88453	0.00501715	TGME49_285470	patched family protein	Integral component of membrane. Hedgehog receptor activity	Toxo DB (GO:0016021; GO:0008158)
		NCLIV_021240	zinc finger (C3HC4 type) / FHA domain-containing protein	8.38378	5.08316e-26	TGME49_203830	FHA domain-containing protein	FHA domains are protein-protein interaction domains specific for phosphoproteins, found in signalling molecules. FHA-containing proteins act in maintaining cell-cycle checkpoints, DNA repair and transcriptional regulation.	InterPro (IPR008984)
		NCLIV_056000	hypothetical protein	5.45865	1.22747e-38	TGME49_312460	zinc finger, MYND-type containing 12 family protein
		NCLIV_067570	unspecified product	3.09801	1.72308e-06	TGME49_278320	Toxoplasma gondii family A protein
		NCLIV_006930	hypothetical protein	2.76899	0.0434146	TGME49_2004801	Toxoplasma gondii family B protein
		NCLIV_060290	conserved hypothetical protein	4.34856	1.20373e-06
		NCLIV_0406202	conserved hypothetical protein	15.2819	0.0252263	TGVAND_287960	putative toxoplasma gondii family D protein
		NCLIV_000380	potential mitochondrial membrane protein,related	6.94874	0.00139589	TGME49_293425	hypothetical protein
		NCLIV_010741	hypothetical protein	4.49294	1.98452e-09	TGARI_356120	putative kelch repeat protein
		NCLIV_016090	conserved hypothetical protein	2.76534	0.00346238	TGARI_239475A	putative flagellar protein
		NCLIV_044250	conserved hypothetical protein	2.4016	2.6787e-14	TGRUB_206550	putative hydrocephalus-inducing-like protein
		NCLIV_004580	hypothetical protein	2.1372	3.95243e-14	TGME49_321340	membrane protein, putative
		NCLIV_013250	GK19899, related	5.86755	2.79417e-124	TGRUB_213255	hypothetical protein
		NCLIV_035550	GH22156, related	2.92291	0.00937166	TGME49_271315	hypothetical protein
		Hypothetical
	Nc-Spain7	NCLIV_0524603	hypothetical protein	-210.273	9.59923e-73	TGME49_215540	hypothetical protein
		NCLIV_0073603	conserved hypothetical protein	-15.8439	0.0478118	TGME49_252260	hypothetical protein
		NCLIV_0620603	hypothetical protein	-9.73371	0.00346238	TGME49_218188	hypothetical protein
		NCLIV_0673203	conserved hypothetical protein	-9.49293	0.00333905	TGME49_278680	hypothetical protein
		NCLIV_0345903	conserved hypothetical protein	-7.12844	0.022009	TGME49_272730	hypothetical protein
		NCLIV_0408103	conserved hypothetical protein	-6.24953	0.0421042	TGME49_288310	hypothetical protein
		NCLIV_023350	conserved hypothetical protein	-6.18612	4.88105e-17	TGME49_281380	hypothetical protein
		NCLIV_025780	conserved hypothetical protein	-5.89747	0.00112661	TGME49_261700	hypothetical protein
		NCLIV_058960	conserved+hypothetical+protein	-5.84757	2.89962e-21	TGME49_316510	hypothetical protein
		NCLIV_031330	conserved hypothetical protein	-5.78329	1.85656e-08	TGME49_230950	hypothetical protein
		NCLIV_065930	conserved hypothetical protein	-5.11533	0.00488459	TGME49_249800	hypothetical protein
		NCLIV_005670	conserved hypothetical protein	-5.11225	3.03271e-14	TGME49_222270	hypothetical protein
		NCLIV_058660	conserved hypothetical protein	-4.52508	0.00127454	TGME49_316130	hypothetical protein
		NCLIV_047150	conserved hypothetical protein	-4.1608	2.95871e-74	TGME49_225560	hypothetical protein
		NCLIV_053100	conserved hypothetical protein	-4.06272	0.000164607	TGME49_207230	hypothetical protein
		NCLIV_007960	conserved hypothetical protein	-4.02226	9.87918e-07	TGME49_253540	hypothetical protein
		NCLIV_033590	conserved hypothetical protein	-3.9175	0.001889	TGME49_274150	hypothetical protein
		NCLIV_009520	conserved hypothetical protein	-3.76526	3.36499e-05	TGME49_320760	hypothetical protein
		NCLIV_034300	conserved hypothetical protein	-3.60938	0.000189342	TGME49_273330	hypothetical protein
		NCLIV_015650	hypothetical protein	-3.38896	7.07007e-05	-
		NCLIV_044360	conserved hypothetical protein	-3.38397	1.99472e-05	TGME49_206700	hypothetical protein
		NCLIV_055500	conserved hypothetical protein	-3.33292	2.248e-06	TGME49_311730	hypothetical protein
		NCLIV_017800	hypothetical protein	-3.3256	0.0214953	-
		NCLIV_037170	conserved hypothetical protein	-3.30961	0.000524914	TGME49_269210	hypothetical protein
		NCLIV_055510	conserved hypothetical protein	-3.20198	0.00129309	TGME49_311740	hypothetical protein
		NCLIV_064560	hypothetical protein	-3.19344	0.00427957	-
		NCLIV_014720	conserved hypothetical protein	-3.04672	1.11663e-08	TGME49_285650	hypothetical protein
		NCLIV_036050	conserved hypothetical protein	-2.98453	6.93214e-07	TGME49_270720	hypothetical protein
		NCLIV_053090	conserved hypothetical protein	-2.95019	0.00161713	-
		NCLIV_015080	conserved hypothetical protein	-2.76107	0.00275143	TGME49_284645	hypothetical protein
		NCLIV_068350	conserved hypothetical protein	-2.71973	0.0112123	TGME49_277540	hypothetical protein
		NCLIV_026360	conserved hypothetical protein	-2.64173	2.70645e-06	TGME49_260800	hypothetical protein
		NCLIV_015150	conserved hypothetical protein	-2.63305	1.56877e-07	TGME49_284570	hypothetical protein
		NCLIV_058270	conserved hypothetical protein	-2.61062	3.67417e-06	TGME49_315580	hypothetical protein
		NCLIV_015770	conserved hypothetical protein	-2.60586	0.000136336	TGME49_238930	hypothetical protein
		NCLIV_059870	conserved hypothetical protein	-2.56601	0.000776789	TGME49_216370	hypothetical protein
		NCLIV_051700	conserved hypothetical protein	-2.56303	5.08704e-07	TGME49_214540	hypothetical protein
		NCLIV_032420	conserved hypothetical protein	-2.5167	2.24742e-05	TGME49_232430	hypothetical protein
		NCLIV_034340	hypothetical protein	-2.49597	0.00943505	TGME49_273280	hypothetical protein
		NCLIV_006110	conserved hypothetical protein	-2.48724	1.30609e-06	TGME49_223095	hypothetical protein
		NCLIV_011620	conserved hypothetical protein	-2.39054	0.0173226	TGME49_211360	hypothetical protein
		NCLIV_010800	conserved hypothetical protein	-2.36417	0.00112515	TGME49_318760	hypothetical protein
		NCLIV_034920	hypothetical protein	-2.34705	0.000493956	TGME49_272383	hypothetical protein
		NCLIV_042120	conserved hypothetical protein	-2.31301	0.000238372	TGME49_289890	hypothetical protein
		NCLIV_024480	conserved hypothetical protein	-2.31031	0.00185452	TGME49_263450	hypothetical protein
		NCLIV_018960	conserved hypothetical protein	-2.31024	0.0190075	TGME49_244400	hypothetical protein
		NCLIV_023770	hypothetical protein	-2.29795	0.00112323	TGME49_282150	hypothetical protein
		NCLIV_063160	conserved hypothetical protein	-2.29175	3.39134e-11	TGME49_246140	hypothetical protein
		NCLIV_029560	conserved hypothetical protein	-2.25193	0.00174921	TGME49_257540	hypothetical protein
		NCLIV_057480	hypothetical protein	-2.2483	0.00154009	TGME49_314415	hypothetical protein
		NCLIV_053010	conserved hypothetical protein	-2.23195	4.64332e-07	-
		NCLIV_007340	conserved hypothetical protein	-2.2289	0.00235424	TGME49_252230	hypothetical protein
		NCLIV_023230	conserved hypothetical protein	-2.20988	9.32645e-13	TGME49_201170	hypothetical protein
		NCLIV_035450	hypothetical protein	-2.20627	0.000345615	TGME49_271470	hypothetical protein
		NCLIV_046780	conserved hypothetical protein	-2.18326	3.42105e-06	TGME49_226050	hypothetical protein
		NCLIV_010420	conserved hypothetical protein	-2.18181	0.0135909	TGME49_319720	hypothetical protein
		NCLIV_015100	conserved hypothetical protein	-2.17049	0.000124015	TGME49_284620	hypothetical protein
		NCLIV_037850	conserved hypothetical protein	-2.16573	0.0238627	TGME49_268350	hypothetical protein
		NCLIV_039850	hypothetical protein	-2.15938	9.53438e-08	TGME49_265420	hypothetical protein
		NCLIV_044720	conserved hypothetical protein	-2.14503	0.00864227	TGME49_306530	hypothetical protein
		NCLIV_048560	conserved hypothetical protein	-2.0966	5.54564e-05	TGME49_223950	hypothetical protein
		NCLIV_050450	conserved hypothetical protein	-2.086	0.00124719	TGME49_236160	hypothetical protein
		NCLIV_053850	conserved hypothetical protein	-2.07652	0.000240646	TGME49_309720	hypothetical protein
		NCLIV_063710	conserved hypothetical protein	-2.05076	3.24944e-06	TGME49_247040	hypothetical protein
		NCLIV_056670	conserved hypothetical protein	-2.02803	4.78575e-16	TGME49_313380	hypothetical protein
		NCLIV_068490	conserved hypothetical protein	-2.02769	0.0421042	TGME49_277220	hypothetical protein
		NCLIV_013900	conserved hypothetical protein	-2.01304	0.016229	TGME49_286760	hypothetical protein
		NCLIV_009750	conserved hypothetical protein	-2.00114	0.0480576	TGME49_320515	hypothetical protein
	Nc-Spain1H	NCLIV_015120	hypothetical protein	62.9169	1.35449e-152	-
		NCLIV_023940	conserved hypothetical protein	43.1297	2.68516e-277	TGME49_264140	hypothetical protein
		NCLIV_043730	hypothetical protein	35.8855	5.21602e-155	TGME49_210460	hypothetical protein
		NCLIV_010680	conserved hypothetical protein	34.5388	1.37271e-10	TGME49_319380	hypothetical protein
		NCLIV_006950	conserved hypothetical protein	23.9751	6.54552e-15	TGME49_276200	hypothetical protein
		NCLIV_033540	conserved hypothetical protein	17.9933	4.28553e-174	TGME49_233960	hypothetical protein
		NCLIV_048760	conserved hypothetical protein	17.2173	2.02503e-148	TGME49_223725	hypothetical protein
		NCLIV_0318002	hypothetical protein	15.4244	0.024736	-
		NCLIV_070090	hypothetical protein, conserved	11.8311	9.71169e-39	TGME49_305790	hypothetical protein
		NCLIV_016200	conserved hypothetical protein	9.71237	0.00036299	TGME49_239580	hypothetical protein
		NCLIV_067410	conserved hypothetical protein	9.2924	4.2782e-05	TGME49_278600	hypothetical protein
		NCLIV_002460	conserved hypothetical protein	7.17414	0.0388514	TGME49_207350	hypothetical protein
		NCLIV_067170	conserved hypothetical protein	6.04352	7.1003e-05	TGME49_278840	hypothetical protein
		NCLIV_041630	conserved hypothetical protein	5.88727	2.43855e-45	TGME49_289280	hypothetical protein
		NCLIV_0601702	hypothetical protein	5.88246	1.77254e-30	-
		NCLIV_031720	conserved hypothetical protein	5.64458	0.0297425	TGME49_231470	hypothetical protein
		NCLIV_010160	conserved hypothetical protein	5.64247	0.029655	TGME49_320090	hypothetical protein
		NCLIV_013590	conserved hypothetical protein	5.51009	0.0108151	-
		NCLIV_036640	conserved hypothetical protein	5.39149	1.12021e-122	TGME49_269950	hypothetical protein
		NCLIV_041620	conserved hypothetical protein	4.83911	2.48972e-08	TGME49_289260	hypothetical protein
		NCLIV_038280	conserved hypothetical protein	4.74978	8.43241e-97	TGME49_200450	hypothetical protein
		NCLIV_018110	hypothetical protein	4.36724	3.2711e-29	-
		NCLIV_069030	hypothetical protein	4.12922	6.27118e-12	-
		NCLIV_000080	conserved hypothetical protein	3.9773	3.82904e-12	TGME49_293030	hypothetical protein
		NCLIV_059130	hypothetical protein	3.95598	0.0118986	-
		NCLIV_002710	conserved hypothetical protein	3.87463	0.0463087	TGME49_207740	hypothetical protein
		NCLIV_017690	conserved hypothetical protein	3.8048	1.2499e-37	TGME49_242670	hypothetical protein
		NCLIV_058520	conserved hypothetical protein	3.71448	2.16202e-46	TGME49_315900	hypothetical protein
		NCLIV_001410	conserved hypothetical protein	3.70022	2.78737e-15	TGME49_294410	hypothetical protein
		NCLIV_041840	conserved hypothetical protein	3.68748	1.64123e-16	TGME49_289590	hypothetical protein
		NCLIV_037980	conserved hypothetical protein	3.63484	7.48151e-44	TGME49_268220	hypothetical protein
		NCLIV_037560	conserved hypothetical protein	3.62964	0.00803653	TGME49_268790	hypothetical protein
		NCLIV_029430	conserved hypothetical protein	3.57826	0.00323832	TGME49_257670	hypothetical protein
		NCLIV_017220	hypothetical protein	3.47853	3.98216e-05	TGME49_241240	hypothetical protein
		NCLIV_026330	conserved hypothetical protein	3.44448	3.97947e-13	TGME49_260830	hypothetical protein
		NCLIV_037300	conserved hypothetical protein	3.21306	0.00250447	TGME49_269075	hypothetical protein
		NCLIV_057140	conserved hypothetical protein	3.04356	0.0400455	TGME49_313940	hypothetical protein
		NCLIV_069090	hypothetical protein	3.02003	0.00681326	-
		NCLIV_047410	hypothetical protein	2.89413	0.00427957	TGME49_225300	hypothetical protein
		NCLIV_049520	conserved hypothetical protein	2.77992	0.00072977	TGME49_234380	hypothetical protein
		NCLIV_059080	conserved hypothetical protein	2.68971	2.6035e-17	TGVEG_363750	hypothetical protein
		NCLIV_036370	conserved hypothetical protein	2.62291	0.0327102	TGME49_270280	hypothetical protein
		NCLIV_037530	conserved hypothetical protein	2.60437	0.00265994	-
		NCLIV_019900	hypothetical protein	2.53311	0.00088947	-
		NCLIV_001225	unspecified product	2.51945	2.19732e-07	-
		NCLIV_066170	hypothetical protein	2.50129	7.74767e-09	-
		NCLIV_033310	hypothetical protein	2.4961	2.39559e-34	-
		NCLIV_044760	conserved hypothetical protein	2.43903	0.0228214	TGME49_306570	hypothetical protein
		NCLIV_057880	hypothetical protein	2.36332	0.000113954	-
		NCLIV_049380	conserved hypothetical protein	2.35585	0.00374009	TGME49_211920	hypothetical protein
		NCLIV_026900	conserved hypothetical protein	2.3065	0.00856134	TGME49_260000	hypothetical protein
		NCLIV_000210	hypothetical protein	2.22982	0.0119944	TGME49_293258	hypothetical protein
		NCLIV_045640	conserved hypothetical protein	2.17546	2.34808e-12	-
		NCLIV_032400	hypothetical protein	2.1733	3.39706e-06	-
		NCLIV_064170	conserved hypothetical protein	2.16265	1.36707e-06	TGME49_248180	hypothetical protein
		NCLIV_015630	conserved hypothetical protein	2.07926	0.000407636	TGME49_238260	hypothetical protein
		NCLIV_034710	conserved hypothetical protein	2.0635	0.0134772	TGME49_272590	hypothetical protein
		NCLIV_068430	hypothetical protein	2.0204	3.41496e-07	-
		NCLIV_013400	conserved hypothetical protein	2.00032	1.68873e-21	TGRUB_213445A	hypothetical protein
		Nc, Neospora caninum; Tg, Toxoplasma gondii; FC, Fold Change in the comparison Nc-Spain1H versus Nc-Spain7; P adj, p-value adjusted by FDR. Genes were considered differentially expressed when presented a FC ≥ 1.5 and p adj ≤ 0.05.
		1No synthenic
		2Exclusively expressed by Nc-Spain1H
		3Exclusively expressed by Nc-Spain7
		References:
		Al Riyahi, A., Al-Anouti, F., Al-Rayes, M., and Ananvoranich, S. (2006). Single argonaute protein from Toxoplasma gondii is involved in the double-stranded RNA induced gene silencing. Int. J. Parasitol. 36: 1003-14. doi:10.1016/j.ijpara.2006.04.014 6/j.ijpara.2006.04.014
		Alves, L.R.,Goldenberg, S. (2016). RNA-binding proteins related to stress response and differentiation in protozoa. World J. Biol. Chem. 7: 78-87. doi:10.4331/wjbc.v7.i1.78
		Anderson, M.Z., Brewer, J., Singh, U., and Boothroyd, J. C. (2009). A pseudouridine synthase homologue is critical to cellular differentiation in Toxoplasma gondii. Eukaryot. Cell. 8: 398-409. doi:10.1128/EC.00329-08
		Berry, L., Chen, C., Reininger, L., Carvalho, T. G., El Hajj, H., Morlon‐Guyot, J., et al. (2016). The conserved apicomplexan Aurora kinase TgArk3 is involved in endodyogeny, duplication rate and parasite virulence. Cell. Microbiol. 18: 1106-20. doi:10.1111/cmi.12571
		Biddau, M., Bouchut, A., Major, J., Saveria, T., Tottey, J., Oka, O., et al. (2018). Two essential Thioredoxins mediate apicoplast biogenesis, protein import, and gene expression in Toxoplasma gondii. PLoS Pathog. 14: e1006836. doi:10.1371/journal.ppat.1006836
		Boucher, L.E.,Bosch, J. (2015). The apicomplexan glideosome and adhesins - Structures and function. J. Struct. Biol. 190: 93-114. doi:10.1016/j.jsb.2015.02.008
		Bourbon, H. (2008). Comparative genomics supports a deep evolutionary origin for the large, four-module transcriptional mediator complex. Nucleic Acids Res. 36: 3993-4008. doi:10.1093/nar/gkn349
		Broderick, S, Rehmet, K, Concannon, C, and Nasheuer, H. (2001). Eukaryotic single-stranded DNA binding proteins: central factors in genome stability. Subcell. Biochem. 50:143-63. doi: 10.1007/978-90-481-3471-7_8
		Brooks, C.F., Johnsen, H., van Dooren, G. G., Muthalagi, M., Lin, S. S., Bohne, W., et al. (2010). The Toxoplasma apicoplast phosphate translocator links cytosolic and apicoplast metabolism and is essential for parasite survival. Cell. Host Microbe 7: 62-73. doi:10.1016/j.chom.2009.12.002
		Castillo, C., Ramírez, G., Valck, C., Aguilar, L., Maldonado, I., Rosas, C., et al. (2013). The interaction of classical complement component C1 with parasite and host calreticulin mediates Trypanosoma cruzi infection of human placenta. PLoS Negl. Trop. Dis. 7:e2376. doi:10.1371/journal.pntd.0002376
		Cerritelli, S.M.,Crouch, R. J. (2009). Ribonuclease H: the enzymes in eukaryotes. FEBS J. 276:1494-505. doi:10.1111/j.1742-4658.2009.06908.x
		Cherry, A.A.,Ananvoranich, S. (2014). Characterization of a homolog of DEAD-box RNA helicases in Toxoplasma gondii as a marker of cytoplasmic mRNP stress granules. Gene 543: 34-44. doi:10.1016/j.gene.2014.04.011
		Chesnokov, I.N. (2007). Multiple functions of the origin recognition complex. Int. Rev. Cytol. 256: 69-109. doi:10.1016/S0074-7696(07)56003-1
		Cipollone, R., Ascenzi, P., and Visca, P. (2007). Common themes and variations in the rhodanese superfamily. IUBMB Life 59: 51-9. doi:10.1080/15216540701206859
		Clarke, D.J.,Giménez‐Abián, J. F. (2000). Checkpoints controlling mitosis. Bioessays 22: 351-63. doi:10.1002/(SICI)1521-1878(200004)22:4<351::AID-BIES5>3.0.CO;2-W
		Copeland, R.A., Solomon, M. E., and Richon, V. M. (2009). Protein methyltransferases as a target class for drug discovery. Nat. Rev. Drug Discov. 8:724-32. doi:10.1038/nrd2974
		Coutinho, P.M., Deleury, E., Davies, G. J., and Henrissat, B. (2003). An evolving hierarchical family classification for glycosyltransferases. J. Mol. Biol. 328: 307-17. doi:10.1016/s0022-2836(03)00307-3
		Daher, W., Oria, G., Fauquenoy, S., Cailliau, K., Browaeys, E., Tomavo, S., et al. (2007). A Toxoplasma gondii leucine-rich repeat protein binds phosphatase type 1 protein and negatively regulates its activity. Eukaryot.Cell. 6: 1606-17. doi:10.1128/EC.00260-07
		Dalmasso, M.C., Onyango, D. O., Naguleswaran, A., Sullivan Jr, W. J., and Angel, S. O. (2009). Toxoplasma H2A variants reveal novel insights into nucleosome composition and functions for this histone family. J.Mol.Biol. 392: 33-47. doi:10.1016/j.jmb.2009.07.017
		Das, M., Singh, S., Pradhan, S., and Narayan, G. (2014). MCM Paradox: Abundance of eukaryotic replicative helicases and genomic integrity. Mol. Biol .Int. 2014: 574850. doi:10.1155/2014/574850
		Deng, W.,Roberts, S. G. (2006). Core promoter elements recognized by transcription factor IIB. Biochem. Soc. Trans. 34: 1051-3. doi:10.1042/BST0341051
		Dixon, S.E., Stilger, K. L., Elias, E. V., Naguleswaran, A., and Sullivan, W. J.,Jr. (2010). A decade of epigenetic research in Toxoplasma gondii. Mol. Biochem. Parasitol. 173: 1-9. doi:10.1016/j.molbiopara.2010.05.001
		Ehrenkaufer, G.M., Hackney, J. A., and Singh, U. (2009). A developmentally regulated Myb domain protein regulates expression of a subset of stage‐specific genes in Entamoeba histolytica. Cell. Microbiol. 11: 898-910. doi:10.1111/j.1462-5822.2009.01300.x
		Ehrenman, K., Sehgal, A., Lige, B., Stedman, T. T., Joiner, K. A., and Coppens, I. (2010). Novel roles for ATP‐binding cassette G transporters in lipid redistribution in Toxoplasma. Mol. Microbiol. 76: 1232-49. doi:10.1111/j.1365-2958.2010.07169.x
		English, C.M., Adkins, M. W., Carson, J. J., Churchill, M. E., and Tyler, J. K. (2006). Structural basis for the histone chaperone activity of Asf1. Cell 127: 495-508. doi:10.1016/j.cell.2006.08.047
		Escotte-Binet, S., Huguenin, A., Aubert, D., Martin, A. P., Kaltenbach, M., Florent, I., et al. (2018). Metallopeptidases of Toxoplasma gondii: in silico identification and gene expression. Parasite. 25: 26. doi:10.1051/parasite/2018025
		Favila, M.A., Geraci, N. S., Jayakumar, A., Hickerson, S., Mostrom, J., Turco, S. J., et al. (2015). Differential impact of LPG-and PG-deficient Leishmania major mutants on the immune response of human dendritic cells. PLoS Negl. Trop. Dis. 9:e0004238. doi: 10.1371/journal.pntd.0004238
		Fenoy, I.M., Bogado, S. S., Contreras, S. M., Gottifredi, V., and Angel, S. O. (2016). The Knowns Unknowns: Exploring the Homologous Recombination Repair Pathway in Toxoplasma gondii. Front. Microbiol. 7: 627. doi:10.3389/fmicb.2016.00627
		Fernández-García, A., Risco-Castillo, V., Zaballos, A., Álvarez-García, G., and Ortega-Mora, L. M. (2006). Identification and molecular cloning of the Neospora caninum SAG4 gene specifically expressed at bradyzoite stage. Mol. Biochem. Parasitol. 146: 89-97. doi:10.1016/j.molbiopara.2005.08.019
		Frankel, M.B., Knoll, L. J. (2008). Functional analysis of key nuclear trafficking components reveals an atypical Ran network required for parasite pathogenesis. Mol. Microbiol. 70: 410-20. doi: 10.1111/j.1365-2958.2008.06419.x
		Freist, W., Verhey, J. F., Ruhlmann, A., Gauss, D. H., and Arnez, J. G. (1999). Histidyl-tRNA synthetase. Biol.Chem. 380: 623-46. doi:10.1515/BC.1999.079
		Fung, C., Beck, J. R., Robertson, S. D., Gubbels, M., and Bradley, P. J. (2012). Toxoplasma ISP4 is a central IMC sub-compartment protein whose localization depends on palmitoylation but not myristoylation. Mol. Biochem. Parasitol. 184: 99-108. doi: 10.1016/j.molbiopara.2012.05.002
		Glaser, S., van Dooren, G. G., Agrawal, S., Brooks, C. F., McFadden, G. I., Striepen, B., et al. (2012). Tic22 is an essential chaperone required for protein import into the apicoplast. J. Biol. Chem. 287: 39505-12. doi:10.1074/jbc.M112.405100
		Gordon, J.L., Sibley, L. D. (2005). Comparative genome analysis reveals a conserved family of actin-like proteins in apicomplexan parasites. BMC Genomics 6: 179. doi: 10.1186/1471-2164-6-179
		Gubbels, M., Lehmann, M., Muthalagi, M., Jerome, M. E., Brooks, C. F., Szatanek, T., et al. (2008). Forward genetic analysis of the apicomplexan cell division cycle in Toxoplasma gondii. PLoS Pathog. 4: e36. doi:10.1371/journal.ppat.0040036
		Haque, S.J., Majumdar, T., and Barik, S. (2012). Redox-assisted protein folding systems in eukaryotic parasites. Antioxid. Redox Signal. 17:674-83. doi:10.1089/ars.2011.4433
		Hill, R.J., Ringel, A., Knuepfer, E., Moon, R. W., Blackman, M. J., and van Ooij, C. (2016). Regulation and essentiality of the StAR-related lipid transfer (START) domain-containing phospholipid transfer protein PFA0210c in Malaria parasites. J. Biol. Chem. 291: 24280-92. doi:10.1074/jbc.M116.740506
		Hori, H. (2014). Methylated nucleosides in tRNA and tRNA methyltransferases. Front Genet. 2014 5:144. doi:10.3389/fgene.2014.00144
		Howard, B.L., Harvey, K. L., Stewart, R. J., Azevedo, M. F., Crabb, B. S., Jennings, I. G., et al. (2015). Identification of potent phosphodiesterase inhibitors that demonstrate cyclic nucleotide-dependent functions in apicomplexan parasites. ACS Chem. Biol. 10:1145-54. doi:10.1021/cb501004q
		Huang, S., Holmes, M. J., Radke, J. B., Hong, D. P., Liu, T. K., White, M. W., et al. (2017). Toxoplasma gondii AP2IX-4 regulates gene expression during bradyzoite development. mSphere. 2:e00054-17. doi: 10.1128/mSphere.00054-17
		Huynh, M.H., Boulanger, M. J., and Carruthers, V. B. (2014). A conserved apicomplexan microneme protein contributes to Toxoplasma gondii invasion and virulence. Infect. Immun. 82: 4358-68. doi:10.1128/IAI.01877-14
		Iyer, L.M., Anantharaman, V., Wolf, M. Y., and Aravind, L. (2008). Comparative genomics of transcription factors and chromatin proteins in parasitic protists and other eukaryotes. Int. J. Parasitol. 38: 1-31. doi:10.1016/j.ijpara.2007.07.018
		Jazwinski, S.M.,Conzelmann, A. (2002). LAG1 puts the focus on ceramide signaling. Int. J. Biochem. Cell Biol. 34: 1491-5. doi: 10.1016/S1357-2725(02)00044-4
		Kramer, S., Kimblin, N. C., and Carrington, M. (2010). Genome-wide in silico screen for CCCH-type zinc finger proteins of Trypanosoma brucei, Trypanosoma cruzi and Leishmania major. BMC Genomics 11: 283. doi:10.1186/1471-2164-11-283
		Krishna, R., Xia, D., Sanderson, S., Shanmugasundram, A., Vermont, S., Bernal, A., et al. (2015). A large-scale proteogenomics study of apicomplexan pathogens-Toxoplasma gondii and Neospora caninum. Proteomics 15: 2618-28. doi:10.1002/pmic.201400553
		Lamarque, M.H., Papoin, J., Finizio, A., Lentini, G., Pfaff, A. W., Candolfi, E., et al. (2012). Identification of a new rhoptry neck complex RON9/RON10 in the Apicomplexa parasite Toxoplasma gondii. PLoS One 7: e32457. doi:10.1371/journal.pone.0032457
		Lamarque, M.H., Roques, M., Kong-Hap, M., Tonkin, M. L., Rugarabamu, G., Marq, J., et al. (2014). Plasticity and redundancy among AMA–RON pairs ensure host cell entry of Toxoplasma parasites. Nat. Commun. 5: 4098. doi:10.1038/ncomms5098
		Lauriola, A. (2017). Ruolo di Mitostatin nel mantenimento della stabilità genomica e suo coinvolgimento nella trasformazione cellulare. etd-01312017-150738
		Leipe, D.D., Wolf, Y. I., Koonin, E. V., and Aravind, L. (2002). Classification and evolution of P-loop GTPases and related ATPases. J. Mol. Biol. 317: 41-72. doi:10.1006/jmbi.2001.5378
		Lorestani, A., Sheiner, L., Yang, K., Robertson, S. D., Sahoo, N., Brooks, C. F., et al. (2010). A Toxoplasma MORN1 null mutant undergoes repeated divisions but is defective in basal assembly, apicoplast division and cytokinesis. PloS One 5: e12302. doi:10.1371/journal.pone.0012302.
		Matsubayashi, M., Kawahara, F., Hatta, T., Yamagishi, J., Miyoshi, T., Sasai, K., et al. (2016). Transcriptional profiles of virulent and precocious strains of Eimeria tenella at sporozoite stage; novel biological insight into attenuated asexual development. Infect. Genet. Evol. 40:54-62. doi:10.1016/j.meegid.2016.02.021
		Melo, M.B., Nguyen, Q. P., Cordeiro, C., Hassan, M. A., Yang, N., McKell, R., et al. (2013). Transcriptional analysis of murine macrophages infected with different Toxoplasma strains identifies novel regulation of host signaling pathways. PLoS Pathog. 9: e1003779. doi:10.1371/journal.ppat.1003779
		Meyer, E.V., Semenya, A. A., Okenu, D. M., Dluzewski, A. R., Bannister, L. H., Barnwell, J. W., et al. (2009). The reticulocyte binding-like proteins of P. knowlesi locate to the micronemes of merozoites and define two new members of this invasion ligand family. Mol. Biochem. Parasitol. 165: 111-21. doi:10.1016/j.molbiopara.2009.01.012
		Mineo, T.W., Oliveira, C. J., Silva, D. A., Oliveira, L. L., Abatepaulo, A. R., Ribeiro, D. P., et al. (2010). Neospora caninum excreted/secreted antigens trigger CC-chemokine receptor 5-dependent cell migration. Int. J. Parasitol. 40: 797-805 doi:10.1016/j.ijpara.2009.12.003
		Mittl, P.R.,Schneider-Brachert, W. (2007). Sel1-like repeat proteins in signal transduction. Cell. Signal. 19: 20-31. doi:10.1016/j.cellsig.2006.05.034
		Moog, D., Przyborski, J. M., and Maier, U. G. (2017). Genomic and proteomic evidence for the presence of a peroxisome in the apicomplexan parasite Toxoplasma gondii and other Coccidia. Genome Biol Evol. 9:3108-3121. doi: 10.1093/gbe/evx231
		Morris, M.T., Cheng, W., Zhou, X. W., Brydges, S. D., and Carruthers, V. B. (2004). Neospora caninum expresses an unusual single-domain Kazal protease inhibitor that is discharged into the parasitophorous vacuole. Int. J. Parasitol. 34: 693-701. doi:10.1016/j.ijpara.2004.01.004
		Morrissette, N. (2015). Targeting Toxoplasma tubules: tubulin, microtubules, and associated proteins in a human pathogen. Eukaryot.Cell. 14: 2-12. doi:10.1128/EC.00225-14
		Mottram, J.C., Helms, M. J., Coombs, G. H., and Sajid, M. (2003). Clan CD cysteine peptidases of parasitic protozoa. Trends Parasitol. 19: 182-7. doi:10.1016/S1471-4922(03)00038-2
		Munoz, C., San Francisco, J., Gutierrez, B., and Gonzalez, J. (2015). Role of the ubiquitin-proteasome systems in the biology and virulence of protozoan parasites. Biomed. Res. Int. 2015:141526. doi:10.1155/2015/141526
		Murzina, N.V., Pei, X., Zhang, W., Sparkes, M., Vicente-Garcia, J., Pratap, J. V., et al. (2008). Structural basis for the recognition of histone H4 by the histone-chaperone RbAp46. Structure 16: 1077-85. doi:10.1016/j.str.2008.05.006
		Narasimhan, J., Joyce, B. R., Naguleswaran, A., Smith, A. T., Livingston, M. R., Dixon, S. E., et al. (2008). Translation regulation by eukaryotic initiation factor-2 kinases in the development of latent cysts in Toxoplasma gondii. J.Biol.Chem. 283: 16591-601. doi:10.1074/jbc.M800681200
		Nigg, E.A. (1995). Cyclin‐dependent protein kinases: key regulators of the eukaryotic cell cycle. Bioessays 17: 471-80. doi:10.1002/bies.950170603
		Palmieri, F.,Pierri, C. L. (2010). Mitochondrial metabolite transport. Essays Biochem. 47: 37-52. doi:10.1042/bse0470037
		Parthun, M. (2007). Hat1: the emerging cellular roles of a type B histone acetyltransferase. Oncogene. 26: 5319. doi:10.1038/sj.onc.1210602
		Piraine REA, Silva RAE, Junior AGDS, Cunha RC, Leite FPL. (2015). The Potential of Neospora caninum Immunogens against Neosporosis. J. Vaccines Vaccin. 6: 298. doi:2157-7560.1000298
		Ponts, N., Yang, J., Chung, D. D., Prudhomme, J., Girke, T., Horrocks, P., et al. (2008). Deciphering the ubiquitin-mediated pathway in apicomplexan parasites: a potential strategy to interfere with parasite virulence. PloS One. 3: e2386. doi:10.1371/journal.pone.0002386
		Pszenny, V., Davis, P. H., Zhou, X. W., Hunter, C. A., Carruthers, V. B., and Roos, D. S. (2012). Targeted disruption of Toxoplasma gondii serine protease inhibitor 1 increases bradyzoite cyst formation in vitro and parasite tissue burden in mice. Infect. Immun. 80: 1156-65. doi:10.1128/IAI.06167-11
		Qiu, X., Shao, Y., Miao, S., and Wang, L. (2006). The diversity of the DnaJ/Hsp40 family, the crucial partners for Hsp70 chaperones. Cell Mol Life Sci. 63: 2560-70. doi:10.1007/s00018-006-6192-6
		Radke, J.B., Worth, D., Hong, D., Huang, S., Sullivan Jr, W. J., Wilson, E. H., et al. (2018). Transcriptional repression by ApiAP2 factors is central to chronic toxoplasmosis. PLoS Pathog. 14: e1007035. doi:10.1371/journal.ppat.1007035
		Rajendran, E., Hapuarachchi, S. V., Miller, C. M., Fairweather, S. J., Cai, Y., Smith, N. C., et al. (2017). Cationic amino acid transporters play key roles in the survival and transmission of apicomplexan parasites. Nat. Commun. 8: 14455. doi:10.1038/ncomms14455
		Reiff, S.B., Vaishnava, S., and Striepen, B. (2012). The HU protein is important for apicoplast genome maintenance and inheritance in Toxoplasma gondii. Eukaryot. Cell. 11: 905-15. doi:10.1128/EC.00029-12
		Risco-Castillo, V., Fernández-García, A., Zaballos, A., Aguado-Martínez, A., Hemphill, A., Rodríguez-Bertos, A., et al. (2007). Molecular characterisation of BSR4, a novel bradyzoite-specific gene from Neospora caninum. Int. J. Parasitol. 37: 887-96. doi:10.1016/j.ijpara.2007.02.003
		Sauvage, V., Millot, J., Aubert, D., Visneux, V., Marle-Plistat, M., Pinon, J., et al. (2006). Identification and expression analysis of ABC protein-encoding genes in Toxoplasma gondii: Toxoplasma gondii ATP-binding cassette superfamily. Mol. Biochem. Parasitol. 147: 177-92. doi:10.1016/j.molbiopara.2006.02.008
		Shanmugam, D., Wu, B., Ramirez, U., Jaffe, E. K., and Roos, D. S. (2010). Plastid-associated porphobilinogen synthase from Toxoplasma gondii: kinetic and structural properties validate therapeutic potential. J. Biol. Chem. 285: 22122-31. doi:10.1074/jbc.M110.107243
		Shanmugasundram, A., Gonzalez-Galarza, F. F., Wastling, J. M., Vasieva, O., and Jones, A. R. (2012). Library of apicomplexan metabolic pathways: a manually curated database for metabolic pathways of apicomplexan parasites. Nucleic Acids Res. D706/D713. doi:10.1093/nar/gks1139.
		Sommerville, C., Richardson, J. M., Williams, R. A., Mottram, J. C., Roberts, C. W., Alexander, J., et al. (2013). Biochemical and immunological characterization of Toxoplasma gondii macrophage migration inhibitory factor. J. Biol. Chem. 288: 12733-41. doi:10.1074/jbc.M112.419911
		Stirnimann, C.U., Petsalaki, E., Russell, R. B., and Müller, C. W. (2010). WD40 proteins propel cellular networks. Trends Biochem. Sci. 35: 565-74. doi: 10.1016/j.tibs.2010.04.003
		Strzalka, W.,Ziemienowicz, A. (2010). Proliferating cell nuclear antigen (PCNA): a key factor in DNA replication and cell cycle regulation. Ann. Bot. 107: 1127-40. doi:10.1093/aob/mcq243
		Stwora-Wojczyk, M.M., Dzierszinski, F., Roos, D. S., Spitalnik, S. L., and Wojczyk, B. S. (2004). Functional characterization of a novel Toxoplasma gondii glycosyltransferase: UDP-N-acetyl-D-galactosamine: polypeptide N-acetylgalactosaminyltransferase-T3. Arch. Biochem. Biophys. 426: 231-40. doi:10.1016/j.abb.2004.02.013
		Sullivan, W.J.,Jr,Jeffers, V. (2012). Mechanisms of Toxoplasma gondii persistence and latency. FEMS Microbiol.Rev. 36: 717-33. doi:10.1111/j.1574-6976.2011.00305.x
		Tran, J.Q., Li, C., Chyan, A., Chung, L., and Morrissette, N. S. (2012). SPM1 stabilizes subpellicular microtubules in Toxoplasma gondii. Eukaryot.Cell. 11: 206-16. doi:10.1128/EC.05161-11
		Uboldi, A.D., McCoy, J. M., Blume, M., Gerlic, M., Ferguson, D. J., Dagley, L. F., et al. (2015). Regulation of starch stores by a Ca 2 -dependent protein kinase is essential for viable cyst development in Toxoplasma gondii. Cell Host Microbe. 18 :670-81. doi:10.1016/j.chom.2015.11.004
		Ulland, T.K., Janowski, A. M., Buchan, B. W., Faron, M., Cassel, S. L., Jones, B. D., et al. (2013). Francisella tularensis live vaccine strain folate metabolism and pseudouridine synthase gene mutants modulate macrophage caspase-1 activation. Infect. Immun. 81: 201-8. doi:10.1128/IAI.00991-12
		Vanagas, L., Jeffers, V., Bogado, S. S., Dalmasso, M. C., Sullivan Jr, W. J., and Angel, S. O. (2012). Toxoplasma histone acetylation remodelers as novel drug targets. Expert Rev. Anti Infect. Ther. 10: 1189–1201. doi:10.1586/eri.12.100
		Wang, J.C. (2002). Cellular roles of DNA topoisomerases: a molecular perspective. Nat Rev. Mol. Cell Biol.3:430-40. doi: 10.1038/nrm831
		Wang, B., Lu, F., Cheng, Y., Chen, J. H., Jeon, H. Y., Ha, K. S., et al. (2015). Immunoprofiling of the tryptophan-rich antigen family in Plasmodium vivax. Infect. Immun. 83: 3083-95. doi:10.1128/IAI.03067-14
		Wei, F., Wang, W., and Liu, Q. (2013). Protein kinases of Toxoplasma gondii: functions and drug targets. Parasitol. Res. 112: 2121-9. doi: 10.1007/s00436-013-3451-y
		Wilson, S.K.,Knoll, L. J. (2018). Patatin‐like phospholipases in microbial infections with emerging roles in fatty acid metabolism and immune regulation by Apicomplexa. Mol. Microbiol. 107: 34-46. doi:10.1111/mmi.13871
		Yan, N. (2013). Structural advances for the major facilitator superfamily (MFS) transporters. Trends Biochem. Sci. 38: 151-9. doi:10.1016/j.tibs.2013.01.003
		Yang, Y.S.,Strittmatter, S. M. (2007). The reticulons: a family of proteins with diverse functions. Genome Biol. 8: 234. doi: 10.1186/gb-2007-8-12-234
		Zeng, B.,Zhu, G. (2006). Two distinct oxysterol binding protein-related proteins in the parasitic protist Cryptosporidium parvum (Apicomplexa). Biochem. Biophys. Res. Commun. 346: 591-9. doi:10.1016/j.bbrc.2006.05.165
